# Supplementary material for: Cultivation and Transcriptional Analysis of a Canonical Nitrospira Under Stable Growth Conditions
Source: Front Microbiol. 2019 Jun 26;10:1325. doi: 10.3389/fmicb.2019.01325 (PMC6606698; doi:10.3389/fmicb.2019.01325)
Supplement: Supplementary file 2 [file Table_1.XLSX]

## Sheet: Sheet1
Supplementary table S1. Gene expression levels of Nitrospira moscoviensis CDS during growth on nitrite and time course differential gene expression analysis.
Refseq							t1	t1	t1	t2	t2	t2	t3	t3	t3	Microscope			Transcription over three timepoints						DESeq timecourse										T1 vs T2						T1 vs T3						T2 vs T3
Locus Tag	Chr	Start	End	Strand	Length	Product	04.sam	05.sam	06.sam	07.sam	10.sam	16.sam	03.sam	09.sam	12.sam	Locus Tag	Gene	Product	RPKM Average	RPKM standard deviation	Fold to median	Fold to median standard deviation	Log2-fold to median	Rank	baseMean	log2FoldChange_t1vst2	lfcSE_t1vst2	log2FoldChange_t1vst3	lfcSE_t1vst3	log2FoldChange_t2vst3	lfcSE_t2vst3	stat	pvalue	padj	baseMean	log2FoldChange	lfcSE	stat	pvalue	padj	baseMean	log2FoldChange	lfcSE	stat	pvalue	padj	baseMean	log2FoldChange	lfcSE
NITMOv2_RS20860	NZ_CP011801	4282377	4285814	-	3438	nitrate oxidoreductase subunit alpha	32106	23128.1	25115.2	37597.4	32184	25777.1	20132.6	14764	23465.6	NITMOv2_4538	-	putative Nitrite oxidoreductase, alpha subunit	26030	6947.99	266.647	71.1741	8.05879	1	4866.43	0.363265	0.207484	-0.532795	0.20774	-0.89606	0.207772	18.3237	0.000104969	0.00580447	4866.43	0.363265	0.207484	1.75081	0.0799784	0.587395	4866.43	-0.532795	0.20774	-2.56472	0.010326	0.18931	4866.43	-0.169529	0.359502
NITMOv2_RS16660	NZ_CP011801	3419462	3420412	-	951	hypothetical protein	20480.3	17796.9	20694.1	16378.1	20124.4	21209.5	18114.1	17452.4	16773.4	NITMOv2_3624	-	putative Nitrite oxidoreductase, membrane subunit	18780.4	1845.02	192.383	18.9001	7.58784	2	956.867	0.0669431	0.137332	-0.24928	0.138008	-0.316223	0.138745	5.6711	0.0586863	0.481845	956.867	0.0669431	0.137332	0.487454	0.625937	0.935905	956.867	-0.24928	0.138008	-1.80628	0.070875	0.454781	956.867	-0.182337	0.237828
NITMOv2_RS11530	NZ_CP011801	2324069	2324275	-	207	hypothetical protein	11732.3	6439.53	11006.7	12677	14603.2	20614.5	22569.9	15012.9	29773.4	NITMOv2_2496	-	conserved exported protein of unknown function	16047.7	7094.55	164.39	72.6754	7.36098	3	176.906	0.795333	0.365319	1.12968	0.364174	0.334346	0.363049	9.61466	0.00816965	0.134107	176.906	0.795333	0.365319	2.17709	0.0294739	0.461911	176.906	1.12968	0.364174	3.10203	0.00192198	0.0708599	176.906	1.92501	0.632738
NITMOv2_RS20840	NZ_CP011801	4273898	4275187	-	1290	nitrate oxidoreductase subunit beta	18966	14717	17157.2	23045.7	17011.8	14084.2	12100.9	10314.3	13324.4	NITMOv2_4533	-	putative Nitrite oxidoreductase, beta subunit	15635.7	3866.75	160.17	39.6104	7.32346	4	1094.58	0.20897	0.200375	-0.582276	0.201429	-0.791247	0.201712	15.8149	0.000367998	0.0123017	1094.58	0.20897	0.200375	1.0429	0.296995	0.832298	1094.58	-0.582276	0.201429	-2.89073	0.00384346	0.0924833	1094.58	-0.373306	0.347504
NITMOv2_RS08105	NZ_CP011801	1646216	1646962	+	747	hypothetical protein	11153.6	12923.7	12075.7	12079.9	13690.4	10394.3	10315.2	12881.2	13075.1	NITMOv2_1768	-	conserved exported protein of unknown function	12065.4	1211.92	123.596	12.4147	6.94949	5	482.619	0.117141	0.160238	-0.0662591	0.160894	-0.1834	0.162055	1.32259	0.516184	0.890786	482.619	0.117141	0.160238	0.731043	0.464753	0.925151	482.619	-0.0662591	0.160894	-0.411817	0.680474	0.883669	482.619	0.0508817	0.277245
NITMOv2_RS20570	NZ_CP011801	4215823	4216479	-	657	hypothetical protein	10119.6	8668.91	8881.96	9018.99	11084.3	9340.73	7919.9	8549.18	9770.18	NITMOv2_4475	-	conserved exported protein of unknown function	9261.52	947.701	94.8735	9.70809	6.56793	6	326.825	0.192689	0.16464	-0.153408	0.166394	-0.346097	0.167724	4.29845	0.116575	0.634382	326.825	0.192689	0.16464	1.17037	0.241852	0.817217	326.825	-0.153408	0.166394	-0.921958	0.35655	0.727531	326.825	0.0392815	0.285403
NITMOv2_RS18560	NZ_CP011801	3819220	3819678	+	459	DNA-binding response regulator	3798.02	4884.17	7319.06	6565.42	6072.59	6852.76	9358.5	9127.65	7433.76	NITMOv2_4039	-	protein of unknown function	6823.55	1799.28	69.8993	18.4315	6.12721	7	166.485	0.391751	0.217686	0.618729	0.216218	0.226978	0.217247	8.27041	0.0159994	0.202371	166.485	0.391751	0.217686	1.79962	0.0719212	0.587395	166.485	0.618729	0.216218	2.86159	0.00421518	0.0937738	166.485	1.01048	0.375604
NITMOv2_RS00545	NZ_CP011801	125015	125980	+	966	hypothetical protein	5463.73	3846.99	7304.35	12863.9	4856.45	6056.84	8274.61	3979.6	8742.17	NITMOv2_0132	-	conserved exported protein of unknown function	6820.97	2867.02	69.8729	29.3693	6.12666	8	357.816	0.64583	0.533023	0.27272	0.533512	-0.373109	0.533375	1.49102	0.474493	0.884713	357.816	0.64583	0.533023	1.21164	0.225652	0.817217	357.816	0.27272	0.533512	0.511179	0.609226	0.843712	357.816	0.91855	0.923584
NITMOv2_RS20945	NZ_CP011801	4303253	4303762	-	510	DUF3015 domain-containing protein	7755.82	6059.01	6746.71	6240.84	7120.33	5348.02	4688.9	6093.46	6941.27	NITMOv2_4557	-	Orotate phosphoribosyltransferase (Modular protein)	6332.71	935.39	64.8712	9.58199	6.01951	9	173.397	-0.0307858	0.202257	-0.29548	0.204414	-0.264694	0.207754	2.44197	0.29494	0.783054	173.397	-0.0307858	0.202257	-0.152211	0.87902	0.980274	173.397	-0.29548	0.204414	-1.4455	0.148318	0.5869	173.397	-0.326266	0.349606
NITMOv2_RS09640	NZ_CP011801	1954716	1955162	-	447	Hsp20/alpha crystallin family protein	7477.2	4608.65	5643.16	7044.67	7026.04	6397.02	4656.26	4995.33	4150.62	NITMOv2_2089	-	Heat shock protein, Hsp20 family	5777.66	1241.84	59.1854	12.7212	5.88717	10	139.699	0.302703	0.209846	-0.454889	0.217064	-0.757592	0.218607	12.0102	0.00246611	0.05018	139.699	0.302703	0.209846	1.4425	0.14916	0.677738	139.699	-0.454889	0.217064	-2.09564	0.0361143	0.33441	139.699	-0.152186	0.366763
NITMOv2_RS20325	NZ_CP011801	4163034	4164740	-	1707	hypothetical protein	6867.1	4259.41	3874.8	6357.4	6014.04	6262.46	4747.5	5191.91	7233.46	NITMOv2_4425	-	conserved exported protein of unknown function	5645.34	1178.24	57.83	12.0697	5.85375	11	518.765	0.411533	0.218826	0.114875	0.219505	-0.296658	0.219736	3.82218	0.147919	0.681664	518.765	0.411533	0.218826	1.88064	0.0600206	0.575837	518.765	0.114875	0.219505	0.523339	0.600738	0.840403	518.765	0.526408	0.379276
NITMOv2_RS16935	NZ_CP011801	3487109	3487558	-	450	cytochrome c	2083.93	3859.82	4572.26	5342.33	5626.98	7771.89	7282.26	5882.82	6113.34	NITMOv2_3685	-	putative Monoheme cytochrome c	5392.85	1732.73	55.2435	17.7498	5.78773	12	129.582	0.941957	0.242246	0.813987	0.243227	-0.12797	0.240062	16.8521	0.000219082	0.00788695	129.582	0.941957	0.242246	3.88843	0.000100894	0.00944365	129.582	0.813987	0.243227	3.34662	0.000818042	0.0449923	129.582	1.75594	0.421966
NITMOv2_RS20575	NZ_CP011801	4216531	4217040	-	510	hypothetical protein	3182.48	4831.37	5470.3	5178.57	5773.24	5434.28	5774.29	6860.78	5937.72	NITMOv2_4476	-	conserved exported protein of unknown function	5382.56	999.723	55.1381	10.241	5.78498	13	146.336	0.397034	0.203109	0.393437	0.203205	-0.0035971	0.204361	4.97831	0.0829799	0.588403	146.336	0.397034	0.203109	1.95479	0.0506084	0.575837	146.336	0.393437	0.203205	1.93616	0.0528482	0.422042	146.336	0.790471	0.35118
NITMOv2_RS20830	NZ_CP011801	4271448	4273085	-	1638	Fis family transcriptional regulator	6723.32	6103.4	6415.42	4206.64	5212.83	5008.84	4555.47	5241.98	4374.48	NITMOv2_4531	nifA	Nif-specific regulatory protein NifA	5315.82	909.345	54.4544	9.31518	5.76698	14	465.384	-0.314705	0.142708	-0.521057	0.143666	-0.206352	0.1463	13.5868	0.00112112	0.0291492	465.384	-0.314705	0.142708	-2.20524	0.0274373	0.458594	465.384	-0.521057	0.143666	-3.62687	0.000286873	0.0220892	465.384	-0.835762	0.246185
NITMOv2_RS16410	NZ_CP011801	3371809	3372108	-	300	RNA-binding protein	3727.04	5520.44	5850.94	5586.88	3533.22	3226.07	5830.73	6905.92	4833.8	NITMOv2_3572	rbpA	putative RNA-binding protein RbpA	5001.67	1255.4	51.2363	12.8602	5.67909	15	79.7758	-0.149651	0.264673	0.148226	0.260961	0.297877	0.26869	1.23192	0.540122	0.894921	79.7758	-0.149651	0.264673	-0.565419	0.571789	0.925151	79.7758	0.148226	0.260961	0.568	0.570035	0.832844	79.7758	-0.00142567	0.451785
NITMOv2_RS02355	NZ_CP011801	486255	487082	-	828	hypothetical protein	4559.33	4707.69	4534.64	5377.5	5357.68	3958.2	4305.39	4920.88	5588.96	NITMOv2_0515	-	putative two-component sensor histidine kinase	4812.25	544.328	49.2959	5.57601	5.6234	16	213.8	0.209769	0.186324	0.0305382	0.187545	-0.179231	0.189336	1.4759	0.478092	0.887337	213.8	0.209769	0.186324	1.12583	0.260238	0.818938	213.8	0.0305382	0.187545	0.162831	0.870651	0.959791	213.8	0.240307	0.322385
NITMOv2_RS16730	NZ_CP011801	3437667	3439442	-	1776	hypothetical protein	4149.73	3786.88	4306.79	4785.37	5106.2	4074.69	4450.85	5625.32	6400.08	NITMOv2_3640	-	putative Nitrite oxidoreductase, cytochrome c containing membrane subunit	4742.88	840.127	48.5853	8.60613	5.60245	17	450.251	0.300306	0.173181	0.35224	0.173039	0.0519338	0.173742	4.74717	0.0931464	0.617878	450.251	0.300306	0.173181	1.73406	0.0829081	0.587395	450.251	0.35224	0.173039	2.03562	0.041789	0.365654	450.251	0.652546	0.299469
NITMOv2_RS20835	NZ_CP011801	4273125	4273766	-	642	hypothetical protein	4138.65	4655.94	4417.99	5036.79	4677.94	4214.17	4207.67	4266.9	5015.83	NITMOv2_4532	-	exported protein of unknown function	4514.65	347.681	46.2474	3.56159	5.5313	18	155.519	0.195864	0.183562	-0.037627	0.185781	-0.233491	0.188361	1.81654	0.403221	0.867735	155.519	0.195864	0.183562	1.06702	0.285964	0.831599	155.519	-0.037627	0.185781	-0.202534	0.839499	0.950609	155.519	0.158237	0.317709
NITMOv2_RS18310	NZ_CP011801	3757742	3762682	-	4941	hypothetical protein	5421.29	4831.52	4731.16	5376.05	5569.7	4781.14	3432.66	3158.75	2870.17	NITMOv2_3987	-	conserved exported protein of unknown function, putative Multicopper oxidase	4463.6	1035.94	45.7244	10.612	5.51489	19	1193.55	0.179508	0.145144	-0.739759	0.146745	-0.919267	0.147127	41.2994	1.08e-09	5.04e-07	1193.55	0.179508	0.145144	1.23675	0.216179	0.802949	1193.55	-0.739759	0.146745	-5.04112	4.63e-07	0.000178188	1193.55	-0.560252	0.252102
NITMOv2_RS16795	NZ_CP011801	3452815	3453612	-	798	hypothetical protein	4203.42	3214.26	4268.1	4985.63	5017.94	4327.52	4300.77	3894.31	4917.18	NITMOv2_3655	-	conserved exported protein of unknown function	4347.68	581	44.537	5.95167	5.47693	20	186.713	0.396425	0.191857	0.0844831	0.194119	-0.311942	0.194987	4.77478	0.0918692	0.617878	186.713	0.396425	0.191857	2.06625	0.0388046	0.534361	186.713	0.0844831	0.194119	0.435212	0.663409	0.877705	186.713	0.480908	0.333111
NITMOv2_RS18570	NZ_CP011801	3819876	3820454	+	579	hypothetical protein	4588.97	5092.78	5119.55	2485.4	3051.14	4938.63	4436.05	3140.86	2799.22	NITMOv2_4041	-	protein of unknown function	3961.4	1073.93	40.5799	11.0012	5.3427	21	122.172	-0.41154	0.230997	-0.583408	0.232935	-0.171868	0.239843	6.87631	0.032124	0.342088	122.172	-0.41154	0.230997	-1.78158	0.0748179	0.587395	122.172	-0.583408	0.232935	-2.50459	0.0122592	0.202878	122.172	-0.994948	0.39713
NITMOv2_RS02605	NZ_CP011801	544614	544982	-	369	hypothetical protein	1498.76	2846.15	4032.31	4817.46	3776.86	4530.32	4680.43	4304.5	4507.85	NITMOv2_0568	-	conserved exported protein of unknown function	3888.29	1077.57	39.831	11.0384	5.31582	22	76.8269	0.76645	0.280688	0.621496	0.28234	-0.144954	0.279913	8.14358	0.0170468	0.209945	76.8269	0.76645	0.280688	2.73061	0.00632177	0.211328	76.8269	0.621496	0.28234	2.20123	0.0277195	0.310716	76.8269	1.38795	0.488521
NITMOv2_RS20655	NZ_CP011801	4230425	4230904	-	480	hypothetical protein	2855.39	4165.57	4552.89	4373.56	3803.12	4536.66	3690.34	3500.92	2976.7	NITMOv2_4492	-	conserved exported protein of unknown function	3828.35	636.051	39.217	6.5156	5.29341	23	98.6654	0.252356	0.217624	-0.25438	0.224051	-0.506736	0.226757	5.00836	0.0817426	0.588403	98.6654	0.252356	0.217624	1.1596	0.246213	0.817217	98.6654	-0.25438	0.224051	-1.13537	0.256222	0.639083	98.6654	-0.00202333	0.379077
NITMOv2_RS16860	NZ_CP011801	3471209	3471541	-	333	RNA-binding protein	1733	3093.19	2897.37	3558.84	3006.25	3765.07	4587.99	5115.5	6211.96	NITMOv2_3670	rbpF	putative RNA-binding protein RbpF	3774.35	1343.47	38.6638	13.7623	5.27291	24	66.629	0.548935	0.263353	0.993014	0.257479	0.444079	0.257569	14.8103	0.000608127	0.0189736	66.629	0.548935	0.263353	2.08441	0.0371229	0.534361	66.629	0.993014	0.257479	3.85668	0.000114939	0.0110629	66.629	1.54195	0.452724
NITMOv2_RS18575	NZ_CP011801	3820836	3821147	+	312	hypothetical protein	2312.06	2395.12	3204.16	2767.39	2579.45	5357.98	5180.66	4574.43	3964.37	NITMOv2_4043	-	protein of unknown function	3592.85	1207.93	36.8046	12.3739	5.20181	25	59.4446	0.511586	0.283202	0.711199	0.280492	0.199613	0.281093	6.72954	0.0345699	0.351711	59.4446	0.511586	0.283202	1.80644	0.0708499	0.587395	59.4446	0.711199	0.280492	2.53554	0.0112274	0.19648	59.4446	1.22279	0.488616
NITMOv2_RS01125	NZ_CP011801	243295	244584	-	1290	nitrate oxidoreductase subunit beta	2935.78	2645.93	3280.06	4908.37	4260.56	3768.29	3158.24	2391.2	3868.36	NITMOv2_0254	-	putative Nitrite oxidoreductase, beta subunit	3468.53	806.467	35.5311	8.26132	5.15101	26	242.418	0.658284	0.204307	0.0170624	0.207624	-0.641221	0.207119	13.8604	0.000977793	0.0269181	242.418	0.658284	0.204307	3.22203	0.00127287	0.0595704	242.418	0.0170624	0.207624	0.0821794	0.934504	0.986747	242.418	0.675346	0.35609
NITMOv2_RS05990	NZ_CP011801	1217443	1219080	-	1638	chaperonin GroEL	3346.98	3378.45	3527.06	3503.81	4949.2	3330.27	2973.9	3246.37	2577.82	NITMOv2_1293	groEL	chaperone Hsp60, peptide-dependent ATPase, heat shock protein	3425.98	643.247	35.0952	6.58932	5.1332	27	302.187	0.30999	0.175449	-0.298473	0.178595	-0.608463	0.179447	11.5191	0.00315261	0.0614758	302.187	0.30999	0.175449	1.76684	0.0772542	0.587395	302.187	-0.298473	0.178595	-1.67122	0.0946773	0.499326	302.187	0.0115173	0.305214
NITMOv2_RS01130	NZ_CP011801	244623	248060	-	3438	nitrate oxidoreductase subunit alpha	3056.38	3072.39	3201.95	5205.04	3973.76	4555.29	2840.21	2015.4	2884.35	NITMOv2_0255	-	putative Nitrite oxidoreductase, alpha subunit	3422.75	979.695	35.0621	10.0358	5.13184	28	639.676	0.671009	0.176114	-0.336867	0.17857	-1.00788	0.17833	34.1655	3.81e-08	4.46e-06	639.676	0.671009	0.176114	3.81008	0.000138924	0.0108361	639.676	-0.336867	0.17857	-1.88647	0.0592321	0.430518	639.676	0.334142	0.306603
NITMOv2_RS16740	NZ_CP011801	3440571	3441884	-	1314	nitric oxide reductase	2854.7	3304.64	2910.52	3440.1	3510.52	2460.73	3235.36	3433.69	4041.15	NITMOv2_3642	-	putative dihaem cytochrome c	3243.49	455.651	33.2258	4.66761	5.05423	29	228.082	0.177484	0.189223	0.173141	0.189295	-0.00434279	0.191185	1.14126	0.56517	0.89776	228.082	0.177484	0.189223	0.937963	0.348263	0.890601	228.082	0.173141	0.189295	0.914665	0.360368	0.727531	228.082	0.350625	0.326686
NITMOv2_RS11535	NZ_CP011801	2324471	2325337	+	867	hypothetical protein	1705.64	9504.34	2185.44	1757.43	2014.97	1369.99	2451.71	4301.26	2508.89	NITMOv2_2497	-	conserved protein of unknown function	3088.85	2549.03	31.6417	26.1119	4.98376	30	140.267	-1.23632	0.664217	-0.587252	0.661771	0.649064	0.666568	3.39737	0.182924	0.681664	140.267	-1.23632	0.664217	-1.86131	0.0626999	0.586672	140.267	-0.587252	0.661771	-0.887395	0.374866	0.740121	140.267	-1.82357	1.14627
NITMOv2_RS18240	NZ_CP011801	3744697	3745149	+	453	hypothetical protein	5573.44	3611.33	3053.65	2728.22	2123.23	2573.47	3421.5	1778.57	2259.67	NITMOv2_3973	-	protein of unknown function	3013.68	1131.35	30.8716	11.5894	4.94821	31	73.298	-0.620383	0.288021	-0.793927	0.290798	-0.173545	0.301952	8.76046	0.0125225	0.172368	73.298	-0.620383	0.288021	-2.15395	0.0312442	0.471687	73.298	-0.793927	0.290798	-2.73017	0.00633026	0.121858	73.298	-1.41431	0.493826
NITMOv2_RS01405	NZ_CP011801	302189	302566	-	378	hypothetical protein	3085.19	2564.66	2706.21	3090.38	3063.79	1687.52	2811.68	3532.13	4287.69	NITMOv2_0316	-	protein of unknown function	2981.03	706.352	30.5372	7.23575	4.93249	32	60.2058	0.0293623	0.280683	0.267285	0.277144	0.237923	0.284359	1.10649	0.575081	0.89776	60.2058	0.0293623	0.280683	0.10461	0.916685	0.980274	60.2058	0.267285	0.277144	0.964426	0.334832	0.712212	60.2058	0.296647	0.47992
NITMOv2_RS18060	NZ_CP011801	3714803	3715468	+	666	hypothetical protein	2924.44	3396.44	3473.35	2745.39	2947.3	2642.15	3258.13	3663.8	1665.06	NITMOv2_3934	-	putative Phosphoribosyltransferase	2968.45	598.223	30.4084	6.1281	4.9264	33	105.486	-0.118906	0.234519	-0.270914	0.23633	-0.152009	0.241911	1.31619	0.517836	0.890786	105.486	-0.118906	0.234519	-0.50702	0.612141	0.935905	105.486	-0.270914	0.23633	-1.14634	0.251655	0.639083	105.486	-0.38982	0.403957
NITMOv2_RS22985	NZ_CP011801	3745169	3745462	-	294	hypothetical protein	3271.48	3915.69	4705.11	2533.73	2670.61	3142.27	2108.76	2114.06	2103.55	na	-	na	2951.7	903.297	30.2367	9.25323	4.91823	34	46.5052	-0.409617	0.265943	-0.984495	0.281021	-0.574878	0.294952	12.5299	0.00190182	0.0423834	46.5052	-0.409617	0.265943	-1.54024	0.123501	0.672526	46.5052	-0.984495	0.281021	-3.50328	0.000459574	0.0294893	46.5052	-1.39411	0.460869
NITMOv2_RS20855	NZ_CP011801	4281001	4282290	-	1290	nitrate oxidoreductase subunit beta	2404.54	2285.83	2595.21	4540.9	4336.64	3290.86	2162.71	2159.21	2711.16	NITMOv2_4537	-	putative Nitrite oxidoreductase, beta subunit	2943.01	917.62	30.1477	9.39995	4.91398	35	206.652	0.854988	0.192201	-0.124993	0.198629	-0.979981	0.197061	31.4766	1.46e-07	1.37e-05	206.652	0.854988	0.192201	4.4484	8.65e-06	0.0010122	206.652	-0.124993	0.198629	-0.629278	0.529167	0.807864	206.652	0.729995	0.337574
NITMOv2_RS19990	NZ_CP011801	4090399	4090689	-	291	HU family DNA-binding protein	1776.55	1596.3	3874.8	3141.64	3979.77	2796.73	2434.86	3480.65	2271.8	NITMOv2_4345	hupB	DNA-binding protein HU-beta	2817.01	868.41	28.857	8.89586	4.85085	36	44.0583	0.541472	0.330254	0.0704181	0.338476	-0.471054	0.338572	3.20619	0.201272	0.699872	44.0583	0.541472	0.330254	1.63956	0.101096	0.622539	44.0583	0.0704181	0.338476	0.208045	0.835194	0.948524	44.0583	0.61189	0.576746
NITMOv2_RS16745	NZ_CP011801	3441963	3443867	-	1905	hypothetical protein	2524.45	2692.9	2300.47	3528.18	2575.99	2390.11	2254.88	2573.86	2966.55	NITMOv2_3643	-	conserved membrane protein of unknown function, Cytochrome bd-like oxidase	2645.26	394.638	27.0977	4.04261	4.7601	37	271.218	0.300807	0.194279	-0.01741	0.195885	-0.318217	0.196835	3.40576	0.182159	0.681664	271.218	0.300807	0.194279	1.54833	0.121544	0.672526	271.218	-0.01741	0.195885	-0.0888787	0.929178	0.986747	271.218	0.283397	0.336877
NITMOv2_RS09775	NZ_CP011801	1982334	1983509	-	1176	hypothetical protein	1840.21	2215.46	2016.48	3008.81	2136.49	2992.64	2880.72	3092.79	3264.12	NITMOv2_2119	pstS	Phosphate ABC transporter, periplasmic phosphate-binding protein	2605.3	543.626	26.6883	5.56882	4.73813	38	163.704	0.539971	0.189734	0.538959	0.189804	-0.00101244	0.189854	10.5167	0.00520379	0.0936682	163.704	0.539971	0.189734	2.84593	0.00442814	0.159413	163.704	0.538959	0.189804	2.83955	0.00451765	0.0937738	163.704	1.07893	0.32864
NITMOv2_RS16735	NZ_CP011801	3439493	3440530	-	1038	cytochrome c	2745.07	2257.05	2138.98	2740.1	2590.73	2542.88	2730.42	2572.53	3102.28	NITMOv2_3641	-	putative monohaem cytochrome c	2602.23	283.765	26.6568	2.90684	4.73643	39	144.775	0.246665	0.194946	0.157834	0.195822	-0.0888311	0.198159	1.6435	0.439661	0.867735	144.775	0.246665	0.194946	1.2653	0.205763	0.802865	144.775	0.157834	0.195822	0.806007	0.420239	0.766005	144.775	0.404499	0.336798
NITMOv2_RS16665	NZ_CP011801	3420496	3421467	-	972	hypothetical protein	2646.97	2555.76	2379.89	1741.76	2241.58	2104.55	2414.66	3102.45	2566.97	NITMOv2_3625	-	conserved protein of unknown function, putative Chaperone protein	2417.18	379.177	24.7612	3.88423	4.63001	40	124.819	-0.215286	0.192343	0.0137055	0.189802	0.228992	0.197067	1.69865	0.427703	0.867735	124.819	-0.215286	0.192343	-1.11929	0.263018	0.818938	124.819	0.0137055	0.189802	0.0722091	0.942435	0.986747	124.819	-0.201581	0.327423
NITMOv2_RS05890	NZ_CP011801	1193669	1195078	+	1410	type I glutamate--ammonia ligase	2839.4	2349.12	2143.51	2737.61	2589.36	1918.79	1915.83	1877.5	2540.92	NITMOv2_1270	glnA	Glutamine synthetase	2323.56	373.756	23.8022	3.82869	4.57302	41	176.584	0.0981555	0.213014	-0.285155	0.215862	-0.383311	0.218238	3.27677	0.194294	0.683681	176.584	0.0981555	0.213014	0.460793	0.644947	0.946489	176.584	-0.285155	0.215862	-1.32101	0.186499	0.600989	176.584	-0.187	0.369209
NITMOv2_RS00560	NZ_CP011801	127524	128372	+	849	hypothetical protein	2492.34	999.131	3368.2	2791.74	485.523	1787.65	4616.18	1030.33	3240.29	NITMOv2_0136	-	conserved exported protein of unknown function	2312.38	1347.52	23.6876	13.8038	4.56606	42	104.965	-0.321037	0.825808	0.30709	0.82384	0.628127	0.826344	0.575149	0.750081	0.9321	104.965	-0.321037	0.825808	-0.388755	0.697457	0.954415	104.965	0.30709	0.82384	0.372754	0.709331	0.901295	104.965	-0.0139474	1.42776
NITMOv2_RS18670	NZ_CP011801	3838938	3839258	-	321	iron-sulfur cluster assembly accessory protein	1573.06	2013.38	1846.87	2056.91	2262.53	2535.35	2207.3	3585.63	2458.09	NITMOv2_4062	erpA	Iron-sulfur cluster insertion protein ErpA 2	2282.13	571.769	23.3777	5.85711	4.54706	43	38.9265	0.448158	0.296192	0.532209	0.29461	0.0840509	0.296913	3.75109	0.153271	0.681664	38.9265	0.448158	0.296192	1.51306	0.130264	0.677738	38.9265	0.532209	0.29461	1.80649	0.0708426	0.454781	38.9265	0.980366	0.510777
NITMOv2_RS18055	NZ_CP011801	3714095	3714568	+	474	Hsp20/alpha crystallin family protein	1902.33	1704.36	1912.87	2785.94	2650.33	3526.77	1681.67	2233.98	1934.6	NITMOv2_3932	-	Heat shock protein, Hsp20 family	2259.21	615.615	23.1429	6.30626	4.5325	44	57.8071	0.79046	0.244173	-0.00294122	0.25831	-0.793401	0.255041	14.0144	0.000905335	0.0264811	57.8071	0.79046	0.244173	3.23729	0.00120671	0.0595704	57.8071	-0.00294122	0.25831	-0.0113864	0.990915	0.994032	57.8071	0.787518	0.433178
NITMOv2_RS19220	NZ_CP011801	3951117	3951623	-	507	ATP synthase F0 subunit B	2276.49	1832.44	1834.22	2003.54	2400.39	2863.37	2183.63	1861.56	2187.24	NITMOv2_4179	atpF	ATP synthase F0, subunit B	2160.32	334.358	22.13	3.42511	4.46793	45	58.805	0.37602	0.249029	-0.0122919	0.255962	-0.388312	0.258446	3.06661	0.215822	0.699872	58.805	0.37602	0.249029	1.50994	0.131058	0.677738	58.805	-0.0122919	0.255962	-0.0480222	0.961699	0.98957	58.805	0.363729	0.433901
NITMOv2_RS05870	NZ_CP011801	1188242	1189099	+	858	hypothetical protein	1415.26	2730.56	1598.69	1657.48	3340.13	2512.35	1574.2	2629.29	1814.42	NITMOv2_1266	-	conserved protein of unknown function	2141.38	674.94	21.9359	6.91397	4.45522	46	98.2521	0.510433	0.2717	0.0119948	0.276546	-0.498438	0.276788	4.64127	0.0982113	0.62112	98.2521	0.510433	0.2717	1.87866	0.0602906	0.575837	98.2521	0.0119948	0.276546	0.0433738	0.965404	0.98957	98.2521	0.522428	0.473271
NITMOv2_RS03390	NZ_CP011801	699239	699787	+	549	hypothetical protein	1861.44	1030.07	2413.81	2220.32	1859.21	1883.07	1613.26	2473.89	3340.62	NITMOv2_0731	-	putative monoheme cytochrome c	2077.3	645.258	21.2795	6.60992	4.41139	47	60.9817	0.255429	0.310885	0.385892	0.309275	0.130463	0.31286	1.61108	0.446846	0.867735	60.9817	0.255429	0.310885	0.821619	0.411294	0.916498	60.9817	0.385892	0.309275	1.24773	0.212129	0.606494	60.9817	0.641321	0.535462
NITMOv2_RS20845	NZ_CP011801	4275274	4278711	-	3438	nitrate oxidoreductase subunit alpha	1402.3	1545.01	1994.88	2713.32	2672.01	3672.38	1970.76	1104.79	1364.64	NITMOv2_4534	-	putative Nitrite oxidoreductase, alpha subunit	2048.9	829.609	20.9886	8.49838	4.39153	48	382.625	0.97448	0.205948	-0.221812	0.210038	-1.19629	0.208927	39.556	2.57e-09	6.02e-07	382.625	0.97448	0.205948	4.73168	2.23e-06	0.000521054	382.625	-0.221812	0.210038	-1.05606	0.290942	0.665118	382.625	0.752668	0.359737
NITMOv2_RS16525	NZ_CP011801	3392180	3392461	-	282	metal-binding protein SmbP	1833.25	2578.3	1319.08	2281.34	2227.41	1715.99	1884.43	2367.28	2117.44	NITMOv2_3596	smbP	Metal-binding protein SmbP	2036.06	385.318	20.857	3.94713	4.38246	49	30.741	0.273763	0.335083	0.109622	0.33939	-0.164141	0.345289	0.677989	0.712486	0.930513	30.741	0.273763	0.335083	0.817002	0.413927	0.916498	30.741	0.109622	0.33939	0.322998	0.746697	0.919242	30.741	0.383385	0.579402
NITMOv2_RS17960	NZ_CP011801	3699790	3700248	-	459	response regulator	1754.95	1056.04	1722.13	2028.64	2480.35	2539.83	1881.35	2106.38	2415.97	NITMOv2_3912	-	protein of unknown function	1998.4	467.669	20.4713	4.79072	4.35553	50	49.2747	0.704475	0.276206	0.392869	0.281791	-0.311607	0.279374	6.538	0.0380445	0.3655	49.2747	0.704475	0.276206	2.55054	0.0107555	0.301159	49.2747	0.392869	0.281791	1.39418	0.163263	0.589815	49.2747	1.09734	0.483055
NITMOv2_RS17115	NZ_CP011801	3518884	3519279	-	396	PIN domain nuclease	2185.95	1785.06	1908.04	1795.6	2428.84	2055.17	1397.85	1918.31	1992.54	NITMOv2_3724	-	PilT protein domain protein	1940.82	286.301	19.8814	2.93282	4.31335	51	41.2793	0.187968	0.282855	-0.232645	0.292665	-0.420613	0.298831	1.98609	0.370447	0.845702	41.2793	0.187968	0.282855	0.66454	0.506345	0.925151	41.2793	-0.232645	0.292665	-0.79492	0.42666	0.766005	41.2793	-0.0446765	0.491955
NITMOv2_RS17995	NZ_CP011801	3705887	3706486	-	600	DNA-binding response regulator	2344.43	2995.85	1627.41	1410.83	1668.47	1356.41	2140.4	2148.51	1670.51	NITMOv2_3919	-	putative Fimbriae Z protein	1929.2	527.449	19.7624	5.4031	4.30469	52	61.4889	-0.521561	0.268265	-0.283674	0.264087	0.237888	0.278669	3.84056	0.146566	0.681664	61.4889	-0.521561	0.268265	-1.94421	0.0518707	0.575837	61.4889	-0.283674	0.264087	-1.07417	0.282749	0.665118	61.4889	-0.805235	0.453607
NITMOv2_RS16820	NZ_CP011801	3457870	3462714	-	4845	hypothetical protein	1699.8	1650.75	1883.42	1956.81	1948.72	1784.19	1914.86	2228.33	2227.19	NITMOv2_3660	-	conserved exported protein of unknown function, putative Multicopper oxidase	1921.56	203.833	19.6842	2.08803	4.29897	53	497.697	0.230355	0.146639	0.206914	0.146747	-0.0234408	0.147698	2.9656	0.227002	0.703555	497.697	0.230355	0.146639	1.57089	0.116207	0.672526	497.697	0.206914	0.146747	1.41	0.158539	0.5869	497.697	0.437269	0.253498
NITMOv2_RS02790	NZ_CP011801	576432	576872	+	441	Hsp20/alpha crystallin family protein	1063.23	1465.52	1660.63	2111.44	2492.57	2443.99	2108.76	1565.97	2079.37	NITMOv2_0607	-	putative Heat shock protein Hsp20	1887.94	477.5	19.3398	4.89143	4.2735	54	44.8121	0.85986	0.281509	0.394599	0.290368	-0.465261	0.285115	9.41256	0.00903833	0.13645	44.8121	0.85986	0.281509	3.05447	0.00225456	0.0959214	44.8121	0.394599	0.290368	1.35896	0.174158	0.599556	44.8121	1.25446	0.495813
NITMOv2_RS01040	NZ_CP011801	231668	231895	+	228	hypothetical protein	843.698	1505.9	1835.43	1485.08	2324.49	2701.25	2039.4	1615.42	2151.27	NITMOv2_0235	-	conserved exported protein of unknown function	1833.55	546.972	18.7826	5.60309	4.23132	55	22.3635	0.734427	0.390284	0.413519	0.399259	-0.320909	0.394778	3.55273	0.169253	0.681664	22.3635	0.734427	0.390284	1.88178	0.0598663	0.575837	22.3635	0.413519	0.399259	1.03571	0.300335	na	22.3635	1.14795	0.68382
NITMOv2_RS03385	NZ_CP011801	698487	699011	+	525	carboxypeptidase regulatory-like domain-containing protein	1603.03	1885.03	1882.04	1741.36	1495.54	2597.61	1855.71	1490.8	1787.29	NITMOv2_0730	-	conserved exported protein of unknown function	1815.38	332.005	18.5965	3.401	4.21696	56	51.0327	0.217652	0.266781	-0.130793	0.273702	-0.348445	0.278691	1.61852	0.445188	0.867735	51.0327	0.217652	0.266781	0.815846	0.414588	0.916498	51.0327	-0.130793	0.273702	-0.477866	0.632745	0.85931	51.0327	0.0868594	0.463142
NITMOv2_RS14510	NZ_CP011801	2974835	2975176	-	342	hypothetical protein	2038.94	1299.2	1631.49	1336.57	2008.82	1736.52	1489.08	2423.13	2369.51	NITMOv2_3166	-	conserved protein of unknown function	1814.81	419.227	18.5906	4.29449	4.2165	57	33.0662	0.106973	0.329425	0.237519	0.326544	0.130546	0.335946	0.531178	0.766754	0.9321	33.0662	0.106973	0.329425	0.324727	0.745388	0.980274	33.0662	0.237519	0.326544	0.727372	0.466998	0.792845	33.0662	0.344492	0.563421
NITMOv2_RS18510	NZ_CP011801	3799026	3800315	-	1290	nitrate oxidoreductase subunit beta	1798.74	1503.01	2072.57	2480.43	1932.47	2097.28	1802.26	1106.37	1405.18	NITMOv2_4027	-	putative Nitrite oxidoreductase, beta subunit	1799.81	413.584	18.437	4.23669	4.20453	58	125.769	0.382436	0.22169	-0.395392	0.229371	-0.777827	0.230461	11.4244	0.00330538	0.0618767	125.769	0.382436	0.22169	1.72509	0.0845108	0.587395	125.769	-0.395392	0.229371	-1.72381	0.0847428	0.486955	125.769	-0.0129559	0.387818
NITMOv2_RS05910	NZ_CP011801	1198665	1199105	+	441	cyanase	1581.22	2244.08	1080.73	1497.2	3026.7	1546.2	1004.17	2192.36	1402.36	NITMOv2_1274	cynS	Cyanate hydratase	1730.56	644.72	17.7275	6.6044	4.14792	59	40.9637	0.439915	0.347912	-0.151862	0.358932	-0.591778	0.360428	3.02499	0.220359	0.699872	40.9637	0.439915	0.347912	1.26445	0.20607	0.802865	40.9637	-0.151862	0.358932	-0.423095	0.672226	0.883669	40.9637	0.288053	0.608146
NITMOv2_RS06445	NZ_CP011801	1313033	1314325	+	1293	ATP-dependent helicase	1385.45	1249.6	1240.65	1872.37	1624.37	1854.26	1883.7	2154.21	2259.56	NITMOv2_1402	rhlE	ATP-dependent RNA helicase RhlE	1724.91	374.098	17.6697	3.8322	4.1432	60	119.159	0.570725	0.197172	0.621512	0.196743	0.050787	0.196549	12.0502	0.0024173	0.05018	119.159	0.570725	0.197172	2.89456	0.00379691	0.148079	119.159	0.621512	0.196743	3.15901	0.00158308	0.0677207	119.159	1.19224	0.341376
NITMOv2_RS17580	NZ_CP011801	3613651	3614514	+	864	universal stress protein	1321.94	2244.08	1856.67	1410.83	1681.19	1858.45	1665.78	2291.32	1184.76	NITMOv2_3831	-	putative Universal stress protein	1723.89	384.666	17.6592	3.94046	4.14235	61	79.195	-0.0128188	0.250804	-0.142368	0.252696	-0.129549	0.258653	0.375489	0.828827	0.951191	79.195	-0.0128188	0.250804	-0.0511108	0.959237	0.983707	79.195	-0.142368	0.252696	-0.563394	0.573167	0.832844	79.195	-0.155186	0.43199
NITMOv2_RS09685	NZ_CP011801	1963024	1963239	+	216	hypothetical protein	1836.8	1776.56	1829.77	1410.83	1908.38	1934.83	1435.13	2557.75	592.378	NITMOv2_2099	-	conserved exported protein of unknown function	1698.05	531.07	17.3945	5.44019	4.12056	62	19.5682	0.0427163	0.414066	-0.347243	0.427628	-0.389959	0.439924	0.938109	0.625594	na	19.5682	0.0427163	0.414066	0.103163	0.917833	na	19.5682	-0.347243	0.427628	-0.812022	0.416779	na	19.5682	-0.304527	0.717703
NITMOv2_RS02350	NZ_CP011801	485584	486258	-	675	DNA-binding response regulator	1994.88	2094.47	1911.57	1755.7	1395.84	1368.63	1574.54	1432.34	1611.27	NITMOv2_0514	devR	Transcriptional regulatory protein DevR (DosR)	1682.14	270.445	17.2315	2.7704	4.10698	63	60.832	-0.285087	0.243794	-0.446914	0.24715	-0.161827	0.258537	3.48022	0.175501	0.681664	60.832	-0.285087	0.243794	-1.16938	0.242251	0.817217	60.832	-0.446914	0.24715	-1.80827	0.070564	0.454781	60.832	-0.732001	0.417367
NITMOv2_RS04495	NZ_CP011801	910950	911264	-	315	50S ribosomal protein L21	763.346	1346.45	1143.99	1451.14	2118.69	768.111	1687.01	2484.67	3181.91	NITMOv2_0977	rplU	50S ribosomal subunit protein L21	1660.59	807.394	17.0108	8.27082	4.08838	64	27.7437	0.567475	0.398278	1.13126	0.386401	0.56379	0.386128	8.57938	0.0137092	0.183311	27.7437	0.567475	0.398278	1.42482	0.154208	0.693938	27.7437	1.13126	0.386401	2.9277	0.0034148	0.0876465	27.7437	1.69874	0.683203
NITMOv2_RS00555	NZ_CP011801	127159	127527	+	369	hypothetical protein	1238.11	821.005	2488.69	2064.63	478.756	1072.97	3120.28	998.145	2542.89	NITMOv2_0135	-	conserved exported protein of unknown function	1647.28	923.364	16.8744	9.4588	4.07677	65	32.4338	-0.204858	0.723694	0.481816	0.715943	0.686674	0.724206	0.975937	0.613872	0.917781	32.4338	-0.204858	0.723694	-0.283072	0.777121	0.980274	32.4338	0.481816	0.715943	0.672981	0.500959	0.794002	32.4338	0.276958	1.24424
NITMOv2_RS05585	NZ_CP011801	1143055	1145136	+	2082	elongation factor G	1512.94	1348.39	1602.4	1561.26	1385.91	1700.93	2105.73	1813.27	1792.5	NITMOv2_1203	fusA	protein chain elongation factor EF-G, GTP-binding	1647.04	236.327	16.872	2.42089	4.07656	66	182.883	0.157929	0.177219	0.275297	0.176358	0.117368	0.179121	2.45541	0.292964	0.783054	182.883	0.157929	0.177219	0.891151	0.372848	0.890601	182.883	0.275297	0.176358	1.56102	0.11852	0.539549	182.883	0.433226	0.30485
NITMOv2_RS05575	NZ_CP011801	1142012	1142383	+	372	30S ribosomal protein S12	840.296	1357.31	906.203	1774.91	1846.82	1596.48	1190.43	3217.81	2063.77	NITMOv2_1201	rpsL	30S ribosomal protein S12	1643.78	723.863	16.8386	7.41513	4.0737	67	32.4902	0.897205	0.358089	1.00841	0.356096	0.111208	0.348323	9.22874	0.00990843	0.144911	32.4902	0.897205	0.358089	2.50554	0.0122265	0.301159	32.4902	1.00841	0.356096	2.83186	0.0046278	0.0937738	32.4902	1.90562	0.623486
NITMOv2_RS05580	NZ_CP011801	1142471	1142941	+	471	30S ribosomal protein S7	1684.71	1329.3	1530.17	1258.06	1250.26	1634.52	2068.47	2394.83	1222.49	NITMOv2_1202	rpsG	30S ribosomal subunit protein S7	1596.98	406.113	16.3592	4.16016	4.03203	68	39.8929	-0.0480711	0.305265	0.225722	0.299492	0.273793	0.311104	0.909284	0.634675	0.917781	39.8929	-0.0480711	0.305265	-0.157473	0.874872	0.980274	39.8929	0.225722	0.299492	0.753683	0.451039	0.789319	39.8929	0.177651	0.51863
NITMOv2_RS20620	NZ_CP011801	4226646	4227137	-	492	ribosome maturation factor RimP	953.019	1231.51	1866.52	1238.78	1196.89	1520.04	2160.2	2152.25	1473.72	NITMOv2_4485	yhbC	Ribosome maturation factor RimP	1532.55	435.686	15.6992	4.46309	3.97262	69	39.9234	0.0610486	0.315566	0.429021	0.308205	0.367972	0.317816	2.2535	0.324085	0.803418	39.9234	0.0610486	0.315566	0.193458	0.846601	0.980274	39.9234	0.429021	0.308205	1.392	0.163923	0.589815	39.9234	0.49007	0.536784
NITMOv2_RS05590	NZ_CP011801	1145239	1146444	+	1206	elongation factor Tu	1465.45	1205.77	1542.21	1403.81	1448.58	1386.14	1689.11	1584.28	1768.29	NITMOv2_1204	tufB	protein chain elongation factor EF-Tu, possible GTP-binding factor (duplicate of tufA)	1499.29	169.28	15.3585	1.73408	3.94097	70	96.5915	0.105454	0.209438	0.173665	0.208675	0.0682118	0.213625	0.707341	0.702106	0.929113	96.5915	0.105454	0.209438	0.503507	0.614608	0.935905	96.5915	0.173665	0.208675	0.832231	0.405279	0.761133	96.5915	0.279119	0.359421
NITMOv2_RS17520	NZ_CP011801	3600922	3601584	-	663	MarR family transcriptional regulator	1124.29	1888.68	1648.1	1123.55	1539.53	1625.64	1569.65	1597.15	1318.78	NITMOv2_3818	-	Transcriptional regulator, MarR family	1492.82	254.923	15.2922	2.61139	3.93472	71	52.6873	-0.00431434	0.266603	-0.111503	0.268843	-0.107188	0.277223	0.212066	0.899395	0.976433	52.6873	-0.00431434	0.266603	-0.0161826	0.987089	0.993309	52.6873	-0.111503	0.268843	-0.414751	0.678324	0.883669	52.6873	-0.115817	0.458099
NITMOv2_RS08365	NZ_CP011801	1706149	1706538	+	390	glycine cleavage system protein GcvH	1603.03	1191.09	1222.05	1258.89	1962.9	1128	1476.13	1829.77	1749.79	NITMOv2_1819	gcvH	Glycine cleavage system, H protein	1491.3	309.259	15.2766	3.168	3.93325	72	31.0868	0.212395	0.333344	0.24216	0.332833	0.0297649	0.340297	0.636677	0.727357	0.9321	31.0868	0.212395	0.333344	0.637166	0.524017	0.925151	31.0868	0.24216	0.332833	0.727572	0.466875	0.792845	31.0868	0.454556	0.572704
NITMOv2_RS18530	NZ_CP011801	3807932	3809221	-	1290	nitrate oxidoreductase subunit beta	1537.79	1174.23	1594.97	1929.22	1780.31	1977.93	1338.82	910.082	1091.08	NITMOv2_4032	-	putative Nitrite oxidoreductase, beta subunit	1481.6	378.475	15.1773	3.87704	3.92384	73	103.647	0.495136	0.214533	-0.451336	0.226245	-0.946472	0.22667	17.7191	0.000142021	0.0059566	103.647	0.495136	0.214533	2.30796	0.0210011	0.424299	103.647	-0.451336	0.226245	-1.9949	0.0460542	0.394019	103.647	0.0437995	0.378212
NITMOv2_RS17120	NZ_CP011801	3519276	3519485	-	210	type II toxin-antitoxin system VapB family antitoxin	1660.28	865.574	2158.82	1612.37	1308.6	628.455	1792.45	1315.41	1929.46	NITMOv2_3725	-	conserved protein of unknown function	1474.6	496.148	15.1056	5.08246	3.91701	74	16.5857	-0.296526	0.4664	-0.00329572	0.456167	0.29323	0.481199	0.519464	0.771258	na	16.5857	-0.296526	0.4664	-0.635777	0.524922	na	16.5857	-0.00329572	0.456167	-0.0072248	0.994235	na	16.5857	-0.299822	0.787199
NITMOv2_RS18515	NZ_CP011801	3800354	3803791	-	3438	nitrate oxidoreductase subunit alpha	1028.12	1127.91	1477.56	1974.67	1729.96	2527.16	1281.64	863.742	1135.13	NITMOv2_4028	-	putative Nitrite oxidoreductase, alpha subunit	1460.65	532.28	14.9627	5.45259	3.9033	75	272.455	0.878923	0.197407	-0.216361	0.202841	-1.09528	0.201591	35.2831	2.18e-08	3.4e-06	272.455	0.878923	0.197407	4.45235	8.49e-06	0.0010122	272.455	-0.216361	0.202841	-1.06665	0.286128	0.665118	272.455	0.662562	0.345816
NITMOv2_RS05595	NZ_CP011801	1146522	1146833	+	312	30S ribosomal protein S10	1425.77	1941.99	1229.5	1030.99	943.702	1057.5	2129.04	1623.19	1640.43	NITMOv2_1205	rpsJ	30S ribosomal protein S10	1446.9	419.001	14.8218	4.29218	3.88965	76	23.8734	-0.46433	0.373311	0.183913	0.352308	0.648243	0.381721	3.01623	0.221327	0.699872	23.8734	-0.46433	0.373311	-1.24382	0.213568	0.802865	23.8734	0.183913	0.352308	0.522023	0.601654	na	23.8734	-0.280417	0.617458
NITMOv2_RS21995	NZ_CP011801	4530681	4531454	-	774	exodeoxyribonuclease III	1366.92	2922.52	1291.6	656.199	405.768	1278.83	2317.19	1814.22	606.154	NITMOv2_4802	xthA	Exodeoxyribonuclease III	1406.6	831.41	14.409	8.51683	3.8489	77	57.025	-1.14989	0.626008	-0.300124	0.617952	0.849764	0.63044	3.38748	0.18383	0.681664	57.025	-1.14989	0.626008	-1.83686	0.0662311	0.586672	57.025	-0.300124	0.617952	-0.485675	0.627198	0.859205	57.025	-1.45001	1.0724
NITMOv2_RS01640	NZ_CP011801	346944	347150	+	207	hypothetical protein	1800.5	1561.1	1403.91	1145.02	1043.09	2018.95	1604.49	1000.86	1030.22	NITMOv2_0366	-	conserved exported protein of unknown function	1400.9	370.764	14.3506	3.79805	3.84304	78	15.5242	-0.0997731	0.436187	-0.4669	0.451995	-0.367127	0.470617	1.13582	0.566708	na	15.5242	-0.0997731	0.436187	-0.228739	0.819072	na	15.5242	-0.4669	0.451995	-1.03298	0.301615	na	15.5242	-0.566673	0.753417
NITMOv2_RS03155	NZ_CP011801	644056	645390	+	1335	ferredoxin oxidoreductase	1576.01	1164.9	1340.94	1369.61	1529.15	1054.49	1476.13	1724.32	1309.89	NITMOv2_0682	forA	Pyruvateferredoxin oxidoreductase alpha subunit	1393.94	207.814	14.2793	2.12881	3.83585	79	99.5244	0.0586358	0.22521	0.0525391	0.225379	-0.00609665	0.230159	0.0839419	0.958898	0.992864	99.5244	0.0586358	0.22521	0.260361	0.794585	0.980274	99.5244	0.0525391	0.225379	0.233115	0.815672	0.939778	99.5244	0.111175	0.387372
NITMOv2_RS22990	NZ_CP011801	3745481	3745987	+	507	hypothetical protein	1351.66	1354.41	1765.44	1536.05	1509.92	1648.61	1397.52	817.268	1051.56	na	-	na	1381.38	293.308	14.1507	3.00459	3.8228	80	37.7766	0.168691	0.29381	-0.530534	0.311575	-0.699224	0.317876	5.16055	0.0757531	0.562445	37.7766	0.168691	0.29381	0.574148	0.565868	0.925151	37.7766	-0.530534	0.311575	-1.70275	0.0886148	0.48724	37.7766	-0.361843	0.51552
NITMOv2_RS01680	NZ_CP011801	352646	353941	-	1296	RNA polymerase sigma factor RpoD/SigA	1475.01	1558.39	1569.65	1332.45	1347.98	1035.3	1298.45	1545.31	1135.39	NITMOv2_0374	rpoD	RNA polymerase sigma factor	1366.44	190.747	13.9976	1.95398	3.8071	81	94.6501	-0.189515	0.212679	-0.288631	0.21419	-0.0991161	0.221819	1.92977	0.381027	0.856027	94.6501	-0.189515	0.212679	-0.891088	0.372882	0.890601	94.6501	-0.288631	0.21419	-1.34755	0.177804	0.599556	94.6501	-0.478147	0.364713
NITMOv2_RS19980	NZ_CP011801	4089470	4089886	-	417	hypothetical protein	1845.21	1404.57	1421.69	893.186	1129.73	1793.43	1964.64	662.438	1125.09	NITMOv2_4343	-	conserved protein of unknown function	1360	448.245	13.9316	4.59175	3.80029	82	30.338	-0.219977	0.3703	-0.390667	0.374888	-0.17069	0.38883	1.11429	0.572842	0.89776	30.338	-0.219977	0.3703	-0.594052	0.552477	0.925151	30.338	-0.390667	0.374888	-1.04209	0.29737	0.669517	30.338	-0.610644	0.635718
NITMOv2_RS18325	NZ_CP011801	3765281	3765655	-	375	response regulator	1410.66	1292.59	1487.92	722.344	1413.29	2932.79	1653.27	675.245	625.551	NITMOv2_3990	-	Putative Response regulator, CheY-like (fragment)	1357.07	707.179	13.9016	7.24423	3.79718	83	27.2897	0.330843	0.418665	-0.581072	0.441416	-0.911916	0.444835	4.21494	0.121545	0.640877	27.2897	0.330843	0.418665	0.790235	0.429391	0.925151	27.2897	-0.581072	0.441416	-1.31638	0.188046	0.600989	27.2897	-0.250229	0.736463
NITMOv2_RS19140	NZ_CP011801	3934750	3935751	-	1002	M23 family peptidase	971.895	1350.48	1334.14	1216.52	1410.47	1185.41	1347.97	1883.85	1468.53	NITMOv2_4162	-	conserved protein of unknown function	1352.14	247.686	13.8511	2.53725	3.79193	84	72.0707	0.181008	0.236745	0.293551	0.235191	0.112543	0.240223	1.58971	0.451647	0.869839	72.0707	0.181008	0.236745	0.764569	0.444528	0.925151	72.0707	0.293551	0.235191	1.24813	0.211982	0.606494	72.0707	0.474558	0.406226
NITMOv2_RS16595	NZ_CP011801	3405287	3405484	-	198	ubiquitin-like protein Pup	728.648	1122.04	939.345	598.533	2280.14	888.724	2012.91	1976.44	1507.87	NITMOv2_3610	pup	Prokaryotic ubiquitin-like protein Pup	1339.41	623.008	13.7207	6.38199	3.77828	85	14.0379	0.552477	0.509711	0.924502	0.497655	0.372025	0.497967	3.46691	0.176673	na	14.0379	0.552477	0.509711	1.0839	0.278408	na	14.0379	0.924502	0.497655	1.85772	0.063209	na	14.0379	1.47698	0.875763
NITMOv2_RS11540	NZ_CP011801	2325334	2326626	+	1293	hypothetical protein	994.918	1405.8	1366.52	1165.32	1229.66	1088.74	1780.95	1495.48	1401.91	NITMOv2_2498	-	protein of unknown function	1325.48	237.298	13.578	2.43084	3.7632	86	91.1463	0.0102461	0.220641	0.249659	0.217625	0.239413	0.223934	1.65469	0.437208	0.867735	91.1463	0.0102461	0.220641	0.0464379	0.962961	0.983987	91.1463	0.249659	0.217625	1.1472	0.2513	0.639083	91.1463	0.259905	0.37675
NITMOv2_RS03785	NZ_CP011801	775254	775460	+	207	50S ribosomal protein L31	813.129	682.981	673.878	1553.95	853.435	1275.13	2246.29	1890.51	1854.4	NITMOv2_0820	rpmE	50S ribosomal subunit protein L31	1315.97	594.091	13.4806	6.08577	3.75281	87	14.4719	0.874336	0.481352	1.38085	0.465204	0.506517	0.451737	8.96657	0.0112963	na	14.4719	0.874336	0.481352	1.81642	0.0693065	na	14.4719	1.38085	0.465204	2.96828	0.00299474	na	14.4719	2.25519	0.831963
NITMOv2_RS12095	NZ_CP011801	2445428	2446705	+	1278	TolC family protein	1232.37	1074.63	945.96	1139.26	1382.32	1617.85	1386.04	1765.21	1284.88	NITMOv2_2614	-	putative Heavy metal efflux system, outer membrane lipoprotein	1314.28	258.981	13.4633	2.65296	3.75096	88	89.5805	0.440465	0.221804	0.36416	0.22285	-0.0763048	0.224122	4.46832	0.107082	0.633815	89.5805	0.440465	0.221804	1.98583	0.0470518	0.575837	89.5805	0.36416	0.22285	1.6341	0.102238	0.531912	89.5805	0.804625	0.384041
NITMOv2_RS01115	NZ_CP011801	242236	242604	-	369	hypothetical protein	716.8	656.804	787.56	1376.42	1223.49	2086.33	1560.14	1372.45	2022.75	NITMOv2_0252	-	conserved protein of unknown function	1311.42	529.216	13.4339	5.4212	3.74781	89	25.8867	1.19503	0.36824	1.11552	0.370258	-0.0795147	0.352432	12.7122	0.0017361	0.0406249	25.8867	1.19503	0.36824	3.24525	0.00117348	0.0595704	25.8867	1.11552	0.370258	3.01281	0.00258844	0.0765694	25.8867	2.31055	0.64898
NITMOv2_RS05525	NZ_CP011801	1128737	1129942	+	1206	elongation factor Tu	1345.82	1222.52	1214.49	1319.58	1220.71	1112.56	1725.83	1068.91	1556.1	NITMOv2_1190	tufB	protein chain elongation factor EF-Tu, possible GTP-binding factor (duplicate of tufA)	1309.61	211.159	13.4155	2.16308	3.74583	90	84.5435	0.0615505	0.236443	0.130828	0.235645	0.0692779	0.24111	0.30837	0.857114	0.954852	84.5435	0.0615505	0.236443	0.260319	0.794618	0.980274	84.5435	0.130828	0.235645	0.555193	0.578763	0.832844	84.5435	0.192379	0.405874
NITMOv2_RS09620	NZ_CP011801	1948042	1950468	-	2427	ATP-dependent Clp protease ATP-binding subunit	2035.98	1148.39	1355.46	1346.3	1213.17	1069.43	1222.51	1214.06	1151.07	NITMOv2_2085	clpC	Negative regulator of genetic competence ClpC/MecB	1306.26	288.486	13.3812	2.9552	3.74213	91	170.342	-0.222288	0.223284	-0.429998	0.224923	-0.20771	0.229032	3.68671	0.158286	0.681664	170.342	-0.222288	0.223284	-0.995539	0.319474	0.861737	170.342	-0.429998	0.224923	-1.91176	0.0559069	0.422042	170.342	-0.652286	0.385274
NITMOv2_RS05885	NZ_CP011801	1190943	1193618	+	2676	[protein-PII] uridylyltransferase	1289.43	1720.8	1290.15	1024.91	1305.67	1208.3	1348.71	1419.38	1043.97	NITMOv2_1269	-	putative (Protein-PII) uridylyltransferase GlnD	1294.59	207.157	13.2616	2.12208	3.72918	92	184.584	-0.165775	0.183088	-0.240193	0.183775	-0.0744172	0.188229	1.82186	0.40215	0.867735	184.584	-0.165775	0.183088	-0.90544	0.365232	0.890601	184.584	-0.240193	0.183775	-1.307	0.191214	0.600989	184.584	-0.405968	0.314894
NITMOv2_RS00200	NZ_CP011801	44863	45375	+	513	hypothetical protein	1031.19	748.027	793.087	891.049	1492.26	900.417	1122.21	2153.89	2452.65	NITMOv2_0042	-	conserved protein of unknown function	1287.2	621.052	13.1858	6.36195	3.72092	93	34.9471	0.443609	0.357332	1.06459	0.345534	0.620985	0.348118	9.73794	0.00768126	0.133142	34.9471	0.443609	0.357332	1.24145	0.214441	0.802865	34.9471	1.06459	0.345534	3.08101	0.002063	0.0708599	34.9471	1.5082	0.610717
NITMOv2_RS20755	NZ_CP011801	4252247	4252441	-	195	30S ribosomal protein S21	924.823	621.437	1132.63	1562.76	1811.91	1579.19	908.391	826.349	2187.24	NITMOv2_4515	rpsU	30S ribosomal protein S21	1283.86	524.502	13.1517	5.37291	3.71717	94	13.5492	0.957681	0.49032	0.453892	0.508165	-0.503789	0.495032	3.86306	0.144926	na	13.5492	0.957681	0.49032	1.95318	0.0507988	na	13.5492	0.453892	0.508165	0.893197	0.371752	na	13.5492	1.41157	0.867315
NITMOv2_RS05880	NZ_CP011801	1190599	1190937	+	339	DUF3240 domain-containing protein	1170.35	1906.47	960.127	1148.64	1158.05	1167.92	1306.31	1358.1	1321.05	NITMOv2_1268	glnB	Nitrogen regulatory protein PII	1277.45	264.556	13.086	2.71007	3.70995	95	23.0702	-0.064904	0.371913	-0.0509588	0.371762	0.0139452	0.387516	0.0379445	0.981207	0.992864	23.0702	-0.064904	0.371913	-0.174514	0.861462	0.980274	23.0702	-0.0509588	0.371762	-0.137074	0.890972	na	23.0702	-0.115863	0.634732
NITMOv2_RS08395	NZ_CP011801	1710385	1710576	-	192	50S ribosomal protein L28	1189.75	736.339	1513.59	1499	1022.34	1260.18	1153.23	1918.31	1110.71	NITMOv2_1824	rpmB	50S ribosomal protein L28	1267.05	339.795	12.9795	3.4808	3.69816	96	13.0007	0.215266	0.482718	0.156294	0.485473	-0.0589722	0.497356	0.216963	0.897196	na	13.0007	0.215266	0.482718	0.445946	0.655637	na	13.0007	0.156294	0.485473	0.321941	0.747497	na	13.0007	0.37156	0.830686
NITMOv2_RS03400	NZ_CP011801	701555	702361	+	807	hypothetical protein	1340.82	1351.45	1469.25	902.09	1045.91	1635.38	1152.37	1312.15	1162.73	NITMOv2_0733	-	putative Monoheme cytochrome c	1263.57	222.817	12.9439	2.2825	3.6942	97	54.3263	-0.133488	0.258875	-0.277486	0.261919	-0.143998	0.271947	1.13061	0.568188	0.89776	54.3263	-0.133488	0.258875	-0.515647	0.606101	0.933726	54.3263	-0.277486	0.261919	-1.05943	0.289403	0.665118	54.3263	-0.410974	0.444163
NITMOv2_RS07510	NZ_CP011801	1535780	1537375	+	1596	cytochrome-c3 hydrogenase	866.297	746.62	837.597	1272.93	1033.11	1102.55	2289.12	1081.75	2124.54	NITMOv2_1640	-	putative [NiFe] hydrogenase large subunit	1261.61	560.322	12.9238	5.73985	3.69195	98	107.286	0.58345	0.263617	1.09532	0.25945	0.511871	0.259069	17.6964	0.000143643	0.0059566	107.286	0.58345	0.263617	2.21325	0.0268806	0.458594	107.286	1.09532	0.25945	4.2217	2.42e-05	0.00311164	107.286	1.67877	0.454423
NITMOv2_RS11050	NZ_CP011801	2226673	2226873	+	201	thiamine biosynthesis protein ThiS	1614.99	1406.74	1619.32	589.599	878.911	1860.35	1321.91	1603.36	424.39	NITMOv2_2396	-	putative Thiamine biosynthesis protein ThiS	1257.73	506.418	12.884	5.18767	3.68751	99	13.4001	-0.427118	0.501755	-0.570844	0.508646	-0.143725	0.537934	1.45154	0.483953	na	13.4001	-0.427118	0.501755	-0.851249	0.394631	na	13.4001	-0.570844	0.508646	-1.12228	0.261743	na	13.4001	-0.997962	0.855327
NITMOv2_RS18580	NZ_CP011801	3821182	3821571	+	390	hypothetical protein	1202.27	932.156	1341.28	1475.94	1207.94	1015.2	1362.59	1416.6	1312.34	NITMOv2_4044	-	conserved exported protein of unknown function	1251.81	181.616	12.8234	1.86044	3.6807	100	26.1681	0.193347	0.347101	0.137543	0.348928	-0.0558036	0.357646	0.333798	0.846285	0.951857	26.1681	0.193347	0.347101	0.557033	0.577505	0.928771	26.1681	0.137543	0.348928	0.394188	0.693442	0.889918	26.1681	0.33089	0.597117
NITMOv2_RS05470	NZ_CP011801	1118333	1119157	+	825	HEAT repeat domain-containing protein	524.627	1150.6	1239.94	1067.1	1118.26	1466.39	1690.85	1506.75	1395.86	NITMOv2_1179	-	conserved protein of unknown function	1240.04	338.088	12.7028	3.46332	3.66707	101	54.3164	0.442529	0.294243	0.601673	0.291957	0.159144	0.293629	4.48929	0.105965	0.633815	54.3164	0.442529	0.294243	1.50396	0.132592	0.677738	54.3164	0.601673	0.291957	2.06082	0.0393198	0.352049	54.3164	1.0442	0.507364
NITMOv2_RS18535	NZ_CP011801	3809260	3812697	-	3438	nitrate oxidoreductase subunit alpha	706.395	1016.3	1396.41	1393.59	1684.28	1791.41	1197.91	863.742	1097.91	NITMOv2_4033	-	putative Nitrite oxidoreductase, alpha subunit	1238.66	361.901	12.6886	3.70726	3.66547	102	229.875	0.74818	0.215829	-0.0460325	0.219966	-0.794212	0.219097	17.5736	0.000152733	0.0059566	229.875	0.74818	0.215829	3.46653	0.000527218	0.0352483	229.875	-0.0460325	0.219966	-0.209271	0.834237	0.948524	229.875	0.702147	0.376737
NITMOv2_RS16320	NZ_CP011801	3356292	3358061	-	1770	proteasome ATPase	1304.16	1654.53	1359.46	1042.58	1319.69	1056.3	925.712	1118.47	1361.46	NITMOv2_3553	arc	Proteasome-associated ATPase	1238.04	222.924	12.6823	2.2836	3.66474	103	117.163	-0.218623	0.207344	-0.404027	0.209644	-0.185405	0.216075	3.76308	0.152355	0.681664	117.163	-0.218623	0.207344	-1.0544	0.291701	0.831599	117.163	-0.404027	0.209644	-1.92721	0.0539538	0.422042	117.163	-0.62265	0.356645
NITMOv2_RS01925	NZ_CP011801	396973	397701	-	729	methyltransferase domain-containing protein	725.65	1025.07	1164.03	1741.76	1211.67	1025.87	1275.67	1673.59	1287.14	NITMOv2_0425	pmtA	Phosphatidylethanolamine N-methyltransferase	1236.72	317.477	12.6687	3.25219	3.6632	104	48.329	0.58605	0.295028	0.466675	0.297172	-0.119375	0.296643	4.3422	0.114052	0.633815	48.329	0.58605	0.295028	1.98642	0.0469862	0.575837	48.329	0.466676	0.297172	1.57039	0.116325	0.539549	48.329	1.05273	0.51255
NITMOv2_RS03360	NZ_CP011801	693096	695042	+	1947	1-deoxy-D-xylulose-5-phosphate synthase	1494.35	1172.18	1098.56	1313	957.759	1084.54	1285.08	1288.73	1193.88	NITMOv2_0726	dxs	1-deoxy-D-xylulose-5-phosphate synthase 1	1209.79	156.833	12.3929	1.60657	3.63144	105	126.088	-0.0562066	0.211685	-0.0813836	0.212024	-0.025177	0.216891	0.158428	0.923842	0.981209	126.088	-0.0562066	0.211685	-0.26552	0.790609	0.980274	126.088	-0.0813836	0.212024	-0.383841	0.701096	0.896584	126.088	-0.13759	0.363989
NITMOv2_RS05875	NZ_CP011801	1189197	1190501	+	1305	ammonium transporter	921.28	1145.25	1024.37	1167.58	1459.01	1466.39	865.32	1305.33	1438.05	NITMOv2_1267	amtB	ammonium transporter	1199.18	231.948	12.2842	2.37604	3.61873	106	83.8757	0.515627	0.227747	0.159025	0.232499	-0.356601	0.232891	5.39825	0.0672642	0.523238	83.8757	0.515627	0.227747	2.26403	0.0235722	0.424299	83.8757	0.159025	0.232499	0.683983	0.493986	0.792845	83.8757	0.674652	0.397002
NITMOv2_RS16905	NZ_CP011801	3478289	3479803	-	1515	Do family serine endopeptidase	1055.46	893.188	1243	1307.46	1153.12	1568.03	1432.29	1063.62	1055.72	NITMOv2_3679	htrA	putative periplasmic serine endoprotease DegP-like	1196.88	211.94	12.2606	2.17108	3.61596	107	97.3696	0.42604	0.221884	0.0687138	0.226158	-0.357326	0.227344	4.25502	0.119133	0.640855	97.3696	0.42604	0.221884	1.9201	0.0548448	0.575837	97.3696	0.0687138	0.226158	0.30383	0.761257	0.924555	97.3696	0.494754	0.386102
NITMOv2_RS18645	NZ_CP011801	3835000	3835386	-	387	PilZ domain-containing protein	807.727	991.57	1381.71	1093.66	557.931	1079.9	2002.51	1427.58	1377.62	NITMOv2_4057	-	conserved protein of unknown function	1191.14	417.579	12.2018	4.27761	3.60902	108	24.3946	-0.112255	0.389092	0.517346	0.371611	0.629601	0.390106	3.1384	0.208212	0.699872	24.3946	-0.112255	0.389092	-0.288506	0.772959	0.980274	24.3946	0.517346	0.371611	1.39217	0.163871	na	24.3946	0.405091	0.653294
NITMOv2_RS08080	NZ_CP011801	1643947	1644375	-	429	50S ribosomal protein L13	1289.15	1459.44	921.281	1223.37	960.861	769.088	1600.01	1126.84	1342.17	NITMOv2_1762	rplM	50S ribosomal subunit protein L13	1188.02	269.406	12.1699	2.75975	3.60525	109	27.1991	-0.166972	0.35732	0.095227	0.350185	0.262199	0.367374	0.520718	0.770775	0.9321	27.1991	-0.166972	0.35732	-0.46729	0.640292	0.946489	27.1991	0.095227	0.350185	0.271934	0.785673	0.93609	27.1991	-0.0717453	0.60469
NITMOv2_RS18000	NZ_CP011801	3706510	3706701	-	192	hypothetical protein	688.8	1051.91	665.981	1410.83	613.407	1145.62	1499.2	1918.31	1666.06	NITMOv2_3920	-	protein of unknown function	1184.46	471.76	12.1334	4.83263	3.60091	110	12.0528	0.561175	0.519609	1.04137	0.501728	0.480194	0.501928	4.31544	0.115588	na	12.0528	0.561175	0.519609	1.07999	0.280144	na	12.0528	1.04137	0.501728	2.07557	0.0379342	na	12.0528	1.60254	0.889671
NITMOv2_RS08060	NZ_CP011801	1640141	1640914	-	774	30S ribosomal protein S2	1196.06	756.725	886.097	1268.65	1166.58	1250.41	1315.93	1338.36	1432.73	NITMOv2_1758	rpsB	30S ribosomal subunit protein S2	1179.06	219.72	12.0781	2.25077	3.59432	111	48.8838	0.46322	0.274929	0.42869	0.27571	-0.03453	0.277299	3.51208	0.172728	0.681664	48.8838	0.46322	0.274929	1.68487	0.0920133	0.590269	48.8838	0.42869	0.27571	1.55486	0.11998	0.539549	48.8838	0.891911	0.47572
NITMOv2_RS03395	NZ_CP011801	699824	701527	+	1704	hypothetical protein	1178.28	1291.93	1009.63	1331.34	933.069	1135.94	1169.47	1134.78	1314.08	NITMOv2_0732	-	conserved membrane protein of unknown function, putative Cytochrome bd-type quinol oxidase subunit 1	1166.5	135.033	11.9495	1.38325	3.57887	112	106.457	0.0903375	0.214719	-0.0083907	0.215958	-0.0987282	0.220259	0.252429	0.881426	0.966059	106.457	0.0903375	0.214719	0.420724	0.673957	0.953323	106.457	-0.0083907	0.215958	-0.0388533	0.969007	0.98957	106.457	0.0819468	0.370096
NITMOv2_RS01630	NZ_CP011801	345175	345495	-	321	hypothetical protein	411.993	943.772	760.474	1371.27	1406.44	1096.37	896.717	1362.54	2059.48	NITMOv2_0363	-	conserved protein of unknown function	1145.45	473.393	11.7338	4.84936	3.5526	113	19.6882	1.0326	0.43302	1.00334	0.434012	-0.0292641	0.419484	7.08585	0.0289286	na	19.6882	1.0326	0.43302	2.38465	0.0170952	na	19.6882	1.00334	0.434012	2.31177	0.0207901	na	19.6882	2.03594	0.758801
NITMOv2_RS11675	NZ_CP011801	2364950	2365549	-	600	hypothetical protein	1542.91	2221.64	1414.3	253.949	654.3	513.238	1328.52	1419.55	888.567	NITMOv2_2526	-	conserved exported protein of unknown function	1137.44	612.188	11.6518	6.27115	3.54248	114	35.7727	-1.76365	0.358504	-0.570645	0.318684	1.193	0.374177	24.971	3.78e-06	0.000294921	35.7727	-1.76365	0.358504	-4.91947	8.68e-07	0.000406132	35.7727	-0.570645	0.318684	-1.79063	0.0733527	0.455496	35.7727	-2.33429	0.565828
NITMOv2_RS05710	NZ_CP011801	1158015	1158779	+	765	type I methionyl aminopeptidase	1147.26	1399.25	972.498	1040.14	1077.67	1293.88	1331.42	872.643	1059.31	NITMOv2_1228	map	Methionine aminopeptidase	1132.67	175.714	11.6029	1.79998	3.53642	115	46.3865	0.0727424	0.276365	-0.162138	0.281493	-0.23488	0.289194	0.688555	0.708732	0.930513	46.3865	0.0727424	0.276365	0.263211	0.792388	0.980274	46.3865	-0.162138	0.281493	-0.575992	0.56462	0.832844	46.3865	-0.0893955	0.477074
NITMOv2_RS03750	NZ_CP011801	768226	769134	-	909	ferredoxin oxidoreductase	1798.78	1222.02	1176.51	893.99	950.139	846.927	1217.93	785.051	1266.87	NITMOv2_0813	porB	Pyruvateferredoxin oxidoreductase, beta subunit	1128.69	310.546	11.5621	3.18119	3.53133	116	54.9036	-0.542813	0.284587	-0.439075	0.282737	0.103738	0.297751	4.34862	0.113687	0.633815	54.9036	-0.542813	0.284587	-1.90737	0.0564726	0.575837	54.9036	-0.439075	0.282737	-1.55295	0.120436	0.539549	54.9036	-0.981888	0.482912
NITMOv2_RS18110	NZ_CP011801	3723498	3723710	-	213	hypothetical protein	508.001	1801.58	1146.07	794.832	1382.32	1652.27	1455.34	540.369	800.961	NITMOv2_3947	-	protein of unknown function	1120.2	480.606	11.4751	4.92325	3.52044	117	12.7617	0.288373	0.519825	-0.313446	0.544763	-0.601819	0.552463	1.1956	0.55002	na	12.7617	0.288373	0.519825	0.55475	0.579066	na	12.7617	-0.313446	0.544763	-0.57538	0.565034	na	12.7617	-0.0250733	0.910359
NITMOv2_RS08085	NZ_CP011801	1644418	1644906	-	489	bifunctional nuclease family protein	1130.97	1693.39	1141.04	761.674	642.258	584.758	1856.49	1271.03	915.823	NITMOv2_1763	-	conserved protein of unknown function	1110.83	444.214	11.3791	4.55046	3.50832	118	28.6603	-0.848762	0.368044	-0.0236292	0.343096	0.825133	0.378429	6.40787	0.0406022	0.380036	28.6603	-0.848762	0.368044	-2.30614	0.0211025	0.424299	28.6603	-0.0236292	0.343096	-0.0688704	0.945093	0.986747	28.6603	-0.872391	0.602605
NITMOv2_RS03365	NZ_CP011801	695130	696314	+	1185	flavodoxin-dependent (E)-4-hydroxy-3-methylbut-2-enyl-diphosphate synthase	1521.86	1329.4	922.104	642.909	1027	1039.47	1195.86	1223.83	989.796	NITMOv2_0727	ispG	1-hydroxy-2-methyl-2-(E)-butenyl 4-diphosphate synthase	1099.14	254.172	11.2594	2.60369	3.49306	119	69.2379	-0.386091	0.261299	-0.223228	0.258818	0.162864	0.270247	2.23662	0.326831	0.805036	69.2379	-0.386091	0.261299	-1.47759	0.139519	0.677738	69.2379	-0.223228	0.258818	-0.862488	0.388419	0.746465	69.2379	-0.609319	0.444403
NITMOv2_RS21675	NZ_CP011801	4457305	4457664	+	360	hypothetical protein	801.513	448.816	904.119	987.579	817.875	1344.19	1230.11	1278.87	2073.32	NITMOv2_4729	-	conserved protein of unknown function	1098.49	460.927	11.2527	4.72166	3.49221	120	21.0365	0.598741	0.415196	0.976175	0.405341	0.377434	0.404174	5.88236	0.0528034	na	21.0365	0.598741	0.415196	1.44207	0.149283	na	21.0365	0.976175	0.405341	2.40828	0.0160279	na	21.0365	1.57492	0.714158
NITMOv2_RS08375	NZ_CP011801	1708023	1708496	+	474	helix-hairpin-helix domain-containing protein	1090.67	1619.15	784.769	678.626	1242.34	974.502	1074.4	1311.25	1079.78	NITMOv2_1821	-	conserved exported protein of unknown function	1095.05	280.18	11.2176	2.87012	3.48769	121	27.5657	-0.14092	0.359494	-0.0548329	0.35734	0.0860875	0.372841	0.156786	0.924601	0.981209	27.5657	-0.14092	0.359494	-0.391996	0.695061	0.954415	27.5657	-0.0548329	0.35734	-0.153447	0.878046	0.959791	27.5657	-0.195753	0.612247
NITMOv2_RS08380	NZ_CP011801	1708493	1709704	+	1212	tyrosine--tRNA ligase	1329.24	983.173	1083.79	866.052	1020.32	852.977	1260.56	968.652	1214.08	NITMOv2_1822	tyrS	Tyrosine--tRNA ligase	1064.32	170.716	10.9027	1.74878	3.44661	122	68.8934	-0.213658	0.245559	-0.0631552	0.243233	0.150503	0.253268	0.788711	0.674114	0.926213	68.8934	-0.213658	0.245559	-0.87009	0.384251	0.890601	68.8934	-0.0631552	0.243233	-0.259649	0.795135	0.93609	68.8934	-0.276814	0.418065
NITMOv2_RS03140	NZ_CP011801	642165	642884	+	720	ferredoxin oxidoreductase	868.306	953.734	1049.42	1293.26	845.138	855.396	830.326	1502.68	1303.23	NITMOv2_0679	forC	2-oxoglutarateferredoxin oxidoredutase, gamma subunit	1055.72	249.574	10.8146	2.5566	3.43491	123	40.587	0.187704	0.308783	0.261219	0.307467	0.0735147	0.314108	0.770807	0.680176	0.926213	40.587	0.187704	0.308783	0.607883	0.543265	0.925151	40.587	0.261219	0.307467	0.849583	0.395557	0.74741	40.587	0.448923	0.530191
NITMOv2_RS18435	NZ_CP011801	3786515	3786781	+	267	hypothetical protein	945.606	378.216	870.741	951.119	882.203	1070.96	1409.79	1551.89	1437.68	NITMOv2_4012	-	exported protein of unknown function	1055.36	364.706	10.8109	3.73599	3.43442	124	14.9708	0.446845	0.463592	0.865109	0.449495	0.418264	0.453975	3.73811	0.154269	na	14.9708	0.446845	0.463592	0.963875	0.335109	na	14.9708	0.865109	0.449495	1.92462	0.0542763	na	14.9708	1.31195	0.792359
NITMOv2_RS11595	NZ_CP011801	2343128	2344222	+	1095	glycosyltransferase family 4 protein	1065.02	1069.78	1157.13	943.128	1236.9	883.854	788.62	1156.24	1188	NITMOv2_2509	-	putative Glycosyl transferase, group 1	1054.3	151.878	10.8001	1.55581	3.43297	125	61.7639	0.00457238	0.250307	-0.14924	0.253152	-0.153812	0.260511	0.457179	0.795655	0.937301	61.7639	0.00457238	0.250307	0.018267	0.985426	0.993309	61.7639	-0.14924	0.253152	-0.589527	0.555508	0.832181	61.7639	-0.144667	0.430829
NITMOv2_RS03440	NZ_CP011801	709557	710558	+	1002	hypothetical protein	935.899	866.725	1194.92	827.911	1155.8	812.224	1082.79	1309.51	1213.13	NITMOv2_0741	-	putative dihaem cytochrome c	1044.32	186.885	10.6979	1.91442	3.41925	126	55.7101	-0.00349558	0.262222	0.178148	0.259104	0.181644	0.267833	0.622834	0.732408	0.9321	55.7101	-0.00349558	0.262222	-0.0133306	0.989364	0.993309	55.7101	0.178148	0.259104	0.687556	0.491733	0.792845	55.7101	0.174653	0.447276
NITMOv2_RS18120	NZ_CP011801	3724278	3724859	-	582	DUF3365 domain-containing protein	929.59	2186.24	818.901	1018.12	1214.17	944.841	494.581	1067.93	659.555	NITMOv2_3949	-	conserved exported protein of unknown function	1037.1	481.889	10.6239	4.9364	3.40924	127	32.311	-0.149554	0.371418	-0.862167	0.389972	-0.712613	0.400495	5.23775	0.072885	0.550164	32.311	-0.149554	0.371418	-0.402657	0.687201	0.954332	32.311	-0.862167	0.389972	-2.21084	0.0270468	0.310716	32.311	-1.01172	0.647814
NITMOv2_RS11700	NZ_CP011801	2368882	2369301	+	420	hypothetical protein	1030.52	721.311	1079.41	1168.97	1028.19	942.682	738.067	1370.22	1218.61	NITMOv2_2531	-	conserved exported protein of unknown function	1033.11	212.465	10.583	2.17646	3.40368	128	23.2415	0.241598	0.371464	0.127709	0.375083	-0.113889	0.382948	0.426216	0.808069	0.938402	23.2415	0.241598	0.371464	0.650395	0.515437	0.925151	23.2415	0.127709	0.375083	0.340483	0.733493	na	23.2415	0.369308	0.640856
NITMOv2_RS03255	NZ_CP011801	668365	669513	-	1149	methionine adenosyltransferase	910.335	1089.81	809.357	1001.95	1110.43	976.32	905.722	1162.01	1317.77	NITMOv2_0704	metK	methionine adenosyltransferase 1	1031.52	155.072	10.5667	1.58854	3.40146	129	63.3442	0.261027	0.246655	0.210166	0.247624	-0.0508611	0.251788	1.26582	0.531045	0.890786	63.3442	0.261027	0.246655	1.05827	0.289933	0.831599	63.3442	0.210166	0.247624	0.848733	0.39603	0.74741	63.3442	0.471194	0.425342
NITMOv2_RS18305	NZ_CP011801	3756649	3757578	-	930	hypothetical protein	1021.28	1194.43	987.448	1638.38	1034.22	780.5	809.493	990.096	825.507	NITMOv2_3986	-	conserved exported protein of unknown function	1031.26	262.996	10.5641	2.69409	3.40109	130	51.8611	0.254273	0.289506	-0.356199	0.30069	-0.610471	0.304435	4.039	0.132722	0.66789	51.8611	0.254273	0.289506	0.878298	0.379782	0.890601	51.8611	-0.356199	0.30069	-1.1846	0.236174	0.631437	51.8611	-0.101926	0.505743
NITMOv2_RS19150	NZ_CP011801	3936535	3936855	+	321	rhodanese	711.624	817.936	941.54	1265.79	1222.99	411.138	827.739	1003.98	1926.61	NITMOv2_4164	-	putative Thiosulfate sulfurtransferase GlpE	1014.37	429.141	10.3911	4.39605	3.37727	131	17.473	0.373625	0.47019	0.540228	0.465502	0.166603	0.470844	1.40282	0.495886	na	17.473	0.373625	0.47019	0.794627	0.42683	na	17.473	0.540228	0.465502	1.16053	0.245834	na	17.473	0.913853	0.808608
NITMOv2_RS05950	NZ_CP011801	1205848	1206699	+	852	CBS domain-containing protein	663.224	853.382	777.688	794.832	990.666	1316.66	1299.41	1161.79	1251.5	NITMOv2_1283	-	conserved protein of unknown function	1012.13	251.134	10.3681	2.57257	3.37408	132	45.8668	0.53651	0.278203	0.634095	0.276539	0.0975848	0.276971	6.02364	0.049202	0.419441	45.8668	0.53651	0.278203	1.92849	0.0537945	0.575837	45.8668	0.634095	0.276539	2.29297	0.0218499	0.290076	45.8668	1.17061	0.480654
NITMOv2_RS01055	NZ_CP011801	233676	234092	-	417	FKBP-type peptidyl-prolyl cis-trans isomerase	807.28	920.234	947.792	974.384	894.367	1054.96	1327.46	993.657	1176.23	NITMOv2_0238	fbp	Peptidyl-prolyl cis-trans isomerase	1010.71	157.464	10.3535	1.61304	3.37205	133	22.4925	0.237621	0.36527	0.318464	0.363069	0.0808438	0.372102	0.84003	0.657037	0.920639	22.4925	0.237621	0.36527	0.650535	0.515347	0.925151	22.4925	0.318464	0.363069	0.877147	0.380407	na	22.4925	0.556085	0.626116
NITMOv2_RS09630	NZ_CP011801	1951595	1952947	-	1353	FAD-binding protein	1119.63	985.206	953.664	700.721	1146.11	991.685	1047.37	1105.9	1024.51	NITMOv2_2087	-	putative Ferredoxin-NADP(+) reductase	1008.31	132.807	10.329	1.36045	3.36863	134	72.7482	-0.0163666	0.235075	-0.0251442	0.235349	-0.00877759	0.242545	0.0119653	0.994035	0.994035	72.7482	-0.0163666	0.235075	-0.0696232	0.944494	0.980864	72.7482	-0.0251442	0.235349	-0.106838	0.914917	0.98299	72.7482	-0.0415109	0.403076
NITMOv2_RS02965	NZ_CP011801	613055	613837	+	783	50S ribosomal protein L25	1366.56	980.173	1187.68	864.875	877.414	870.847	1018.02	1175.98	599.187	NITMOv2_0642	rplY	50S ribosomal protein L25	993.415	226.8	10.1764	2.3233	3.34715	135	41.5443	-0.342456	0.296461	-0.439937	0.298994	-0.0974814	0.313816	2.53651	0.281323	0.769013	41.5443	-0.342456	0.296461	-1.15515	0.24803	0.817451	41.5443	-0.439937	0.298994	-1.47139	0.141186	0.572175	41.5443	-0.782393	0.506056
NITMOv2_RS08165	NZ_CP011801	1657374	1659185	+	1812	ATP-dependent metallopeptidase FtsH/Yme1/Tma family protein	842.651	902.833	936.623	896.95	974.951	861.871	1319.72	978.211	1035.68	NITMOv2_1780	ftsH	protease, ATP-dependent zinc-metallo	972.166	143.849	9.95871	1.47357	3.31596	136	94.0148	0.138758	0.213764	0.24233	0.212548	0.103572	0.217242	1.31202	0.518917	0.890786	94.0148	0.138758	0.213764	0.649118	0.516262	0.925151	94.0148	0.24233	0.212548	1.14012	0.254236	0.639083	94.0148	0.381088	0.366809
NITMOv2_RS02625	NZ_CP011801	547877	548497	-	621	cytochrome c	1142.25	1138.3	599.003	763.346	758.609	1062.6	1176.63	963.789	1133.24	NITMOv2_0573	-	putative Cytochrome c	970.864	212.42	9.94538	2.176	3.31403	137	32.1002	-0.0462112	0.339647	0.127817	0.335585	0.174028	0.348181	0.274663	0.871681	0.962139	32.1002	-0.0462112	0.339647	-0.136057	0.891776	0.980274	32.1002	0.127817	0.335585	0.380877	0.703295	0.896584	32.1002	0.0816054	0.578554
NITMOv2_RS03745	NZ_CP011801	767502	768209	-	708	ferredoxin oxidoreductase	1222.65	941.372	1034.37	789.107	1053.53	1242.71	750.577	1040.44	632.539	NITMOv2_0812	porC	Pyruvateferredoxin oxidoreductase gamma subunit	967.477	209.104	9.91068	2.14202	3.30898	138	36.7064	0.0263455	0.299926	-0.496568	0.313509	-0.522913	0.322484	3.305	0.19157	0.682751	36.7064	0.0263455	0.299926	0.08784	0.930004	0.980274	36.7064	-0.496568	0.313509	-1.5839	0.113216	0.539549	36.7064	-0.470222	0.522006
NITMOv2_RS05740	NZ_CP011801	1161871	1162299	+	429	50S ribosomal protein L17	1177.05	1365.28	839.991	828.738	777.84	820.36	1083.88	965.863	745.65	NITMOv2_1234	rplQ	50S ribosomal subunit protein L17	956.071	211.205	9.79384	2.16355	3.29187	139	21.8673	-0.349422	0.376265	-0.333637	0.376036	0.0157851	0.399251	1.15579	0.561078	0.89776	21.8673	-0.349422	0.376265	-0.92866	0.353065	0.890601	21.8673	-0.333637	0.376036	-0.887248	0.374945	na	21.8673	-0.683059	0.637616
NITMOv2_RS03515	NZ_CP011801	727540	727842	-	303	RNA-binding protein	634.862	399.935	920.744	670.492	777.387	2105.22	949.988	1291.54	844.578	NITMOv2_0759	rbpA	putative RNA-binding protein RbpA	954.971	496.579	9.78257	5.08688	3.29021	140	15.4033	0.881814	0.488512	0.533284	0.49951	-0.34853	0.489697	3.29439	0.192589	na	15.4033	0.881814	0.488512	1.8051	0.0710591	na	15.4033	0.533284	0.49951	1.06761	0.285694	na	15.4033	1.4151	0.858199
NITMOv2_RS20320	NZ_CP011801	4161288	4162040	-	753	hypothetical protein	734.454	858.293	1034.31	562.083	755.965	1226.86	1205.61	1222.83	991.23	NITMOv2_4420	-	protein of unknown function	954.626	241.878	9.77903	2.47776	3.28969	141	38.0331	0.0301533	0.313212	0.301798	0.30744	0.271645	0.317907	1.1492	0.56293	0.89776	38.0331	0.0301533	0.313212	0.0962712	0.923305	0.980274	38.0331	0.301798	0.30744	0.981648	0.326273	0.701761	38.0331	0.331951	0.533083
NITMOv2_RS08390	NZ_CP011801	1710076	1710363	+	288	hypothetical protein	333.964	981.785	1049.42	1116.9	886.032	992.871	1768.29	559.507	888.567	NITMOv2_1823	-	exported protein of unknown function	953.038	395.277	9.76277	4.04915	3.28729	142	14.7003	0.48489	0.507446	0.407479	0.510259	-0.077411	0.512429	1.04521	0.592972	na	14.7003	0.48489	0.507446	0.955549	0.3393	na	14.7003	0.407479	0.510259	0.798572	0.424539	na	14.7003	0.892368	0.879289
NITMOv2_RS19925	NZ_CP011801	4081241	4081711	+	471	peroxiredoxin	740.251	1157.77	666.366	1042.39	791.828	840.608	987.224	977.483	1358.32	NITMOv2_4332	bcp2	Peroxiredoxin	951.361	218.513	9.74559	2.23841	3.28475	143	23.9189	0.218866	0.373106	0.342826	0.369833	0.123961	0.378712	0.885959	0.64212	0.919158	23.9189	0.218866	0.373106	0.586605	0.557469	0.925151	23.9189	0.342826	0.369833	0.926976	0.353939	na	23.9189	0.561692	0.639177
NITMOv2_RS03020	NZ_CP011801	622655	623293	+	639	DUF177 domain-containing protein	884.299	790.169	1055.11	900.81	675.803	1135.94	1004.88	900.615	1201.44	NITMOv2_0654	-	conserved protein of unknown function	949.896	166.494	9.73058	1.70553	3.28253	144	32.4069	0.0772551	0.321399	0.103404	0.320969	0.0261484	0.331091	0.114259	0.944472	0.992017	32.4069	0.0772551	0.321399	0.240371	0.810043	0.980274	32.4069	0.103404	0.320969	0.32216	0.747331	0.919242	32.4069	0.180659	0.550469
NITMOv2_RS03430	NZ_CP011801	707970	708689	+	720	cytochrome c	751.419	1065.94	1081.71	752.441	1063.24	1313.64	861.079	895.212	710.853	NITMOv2_0739	-	putative monoheme cytochrome c	943.949	200.65	9.66966	2.05543	3.27346	145	36.3555	0.208624	0.300978	-0.299614	0.313722	-0.508238	0.319826	2.53667	0.2813	0.769013	36.3555	0.208624	0.300978	0.693154	0.488213	0.925151	36.3555	-0.299614	0.313722	-0.955031	0.339562	0.714213	36.3555	-0.0909905	0.5251
NITMOv2_RS21795	NZ_CP011801	4479722	4480756	+	1035	hypothetical protein	836.362	702.494	876.041	1030.52	910.331	913.84	1005.48	1289.99	906.596	NITMOv2_4757	pstS	Phosphate ABC transporter, periplasmic phosphate-binding protein, PstS	941.295	161.587	9.64248	1.65527	3.2694	146	52.0563	0.341892	0.262073	0.312061	0.262776	-0.029831	0.266313	2.09686	0.350488	0.816061	52.0563	0.341892	0.262073	1.30457	0.19204	0.7762	52.0563	0.312061	0.262776	1.18755	0.235009	0.631437	52.0563	0.653953	0.452266
NITMOv2_RS18300	NZ_CP011801	3755696	3756613	-	918	hypothetical protein	864.377	1056.04	1253.61	958.994	812.53	1389.72	723.595	626.899	743.376	NITMOv2_3985	-	conserved exported protein of unknown function	936.571	254.905	9.59408	2.6112	3.26214	147	46.2259	0.0898393	0.277146	-0.670092	0.294433	-0.759932	0.300874	7.40803	0.0246245	0.28108	46.2259	0.0898393	0.277146	0.324158	0.745818	0.980274	46.2259	-0.670092	0.294433	-2.27587	0.0228537	0.293289	46.2259	-0.580253	0.486289
NITMOv2_RS03405	NZ_CP011801	702358	703296	+	939	ubiquinol-cytochrome c reductase iron-sulfur subunit	845.046	752.806	705.634	1045.72	877.975	773.019	1202.6	1078.67	1135.55	NITMOv2_0734	-	putative Quinol-cytochrome c reductase, FeS subunit, modulated with PRC-barrel (modular protein)	935.225	183.069	9.58029	1.87533	3.26007	148	46.9398	0.345357	0.276576	0.491517	0.273975	0.14616	0.277872	3.38238	0.1843	0.681664	46.9398	0.345357	0.276576	1.24869	0.21178	0.802865	46.9398	0.491517	0.273975	1.79402	0.0728093	0.455496	46.9398	0.836874	0.47529
NITMOv2_RS08575	NZ_CP011801	1749052	1749270	+	219	cold shock domain-containing protein	823.473	553.335	743.112	695.75	537.781	1104.82	1516.58	630.677	1752.79	NITMOv2_1860	cspE	DNA-binding transcriptional repressor	928.701	438.471	9.51347	4.49163	3.24997	149	10.8075	0.202198	0.559802	0.792968	0.535617	0.59077	0.551774	2.3977	0.301541	na	10.8075	0.202198	0.559802	0.361195	0.717954	na	10.8075	0.792968	0.535617	1.48048	0.138746	na	10.8075	0.995166	0.946611
NITMOv2_RS08075	NZ_CP011801	1643522	1643914	-	393	30S ribosomal protein S9	825.987	1182	1183.14	947.731	449.519	727.6	957.797	1288.64	705.427	NITMOv2_1761	rpsI	30S ribosomal subunit protein S9	918.649	271.388	9.41049	2.78005	3.23427	150	19.1548	-0.449046	0.415826	-0.18536	0.406446	0.263686	0.434838	1.1776	0.554994	na	19.1548	-0.449046	0.415826	-1.07989	0.280192	na	19.1548	-0.18536	0.406446	-0.456051	0.648354	na	19.1548	-0.634405	0.697951
NITMOv2_RS18115	NZ_CP011801	3723720	3724031	-	312	hypothetical protein	1233.1	841.53	968.699	976.727	1321.18	775.497	922.584	516.468	683.513	NITMOv2_3948	-	conserved exported protein of unknown function	915.478	252.535	9.378	2.58693	3.22928	151	15.4615	0.110398	0.433799	-0.608646	0.464385	-0.719044	0.476186	2.59659	0.272997	na	15.4615	0.110398	0.433799	0.254491	0.799116	na	15.4615	-0.608646	0.464385	-1.31065	0.189976	na	15.4615	-0.498248	0.762179
NITMOv2_RS02270	NZ_CP011801	461602	463707	-	2106	universal stress protein UspA	1004.75	671.306	750.673	747.618	1053.22	856.441	883.157	1060.26	1184.76	NITMOv2_0498	-	putative Universal stress protein UspA (Modular protein)	912.464	173.14	9.34714	1.77362	3.22452	152	102.648	0.219265	0.230213	0.27745	0.229677	0.0581847	0.232845	1.62279	0.444238	0.867735	102.648	0.219265	0.230213	0.952444	0.340872	0.890601	102.648	0.27745	0.229677	1.208	0.227047	0.619952	102.648	0.496715	0.396589
NITMOv2_RS05660	NZ_CP011801	1152602	1153123	+	522	50S ribosomal protein L5	552.768	619.056	1002.1	940.552	864.88	927.031	848.353	1367.07	1062.19	NITMOv2_1218	rplE	50S ribosomal subunit protein L5	909.334	239.76	9.31507	2.45606	3.21957	153	25.2794	0.424951	0.365417	0.496437	0.363775	0.071486	0.367196	2.17492	0.337072	0.816061	25.2794	0.424951	0.365417	1.16292	0.244862	0.817217	25.2794	0.496437	0.363775	1.36468	0.172353	0.599556	25.2794	0.921388	0.629993
NITMOv2_RS03135	NZ_CP011801	641241	642140	+	900	ferredoxin oxidoreductase	507.625	785.428	891.203	1034.61	1003.26	1075.36	811.874	920.789	1137.37	NITMOv2_0678	forB	2-oxoacidferredoxin oxidoreductase, beta subunit	907.501	190.633	9.29629	1.95281	3.21666	154	43.8116	0.628852	0.289091	0.332128	0.294907	-0.296724	0.293645	4.73451	0.0937379	0.617878	43.8116	0.628852	0.289091	2.17527	0.0296097	0.461911	43.8116	0.332128	0.294907	1.12621	0.260076	0.639083	43.8116	0.96098	0.504837
NITMOv2_RS06760	NZ_CP011801	1381532	1381774	+	243	DUF465 domain-containing protein	692.666	748.027	1195.93	1184.4	969.334	1086.22	455.597	757.851	1053.12	NITMOv2_1470	-	conserved protein of unknown function	904.792	253.712	9.26855	2.59899	3.21234	155	11.8716	0.395501	0.490326	-0.303409	0.522261	-0.69891	0.527451	1.81258	0.40402	na	11.8716	0.395501	0.490326	0.80661	0.419891	na	11.8716	-0.303409	0.522261	-0.580952	0.561273	na	11.8716	0.0920928	0.864955
NITMOv2_RS06670	NZ_CP011801	1363162	1364040	-	879	DUF4440 domain-containing protein	683.885	528.469	859.597	693.376	893.243	925.88	1209.12	1178.48	1043.23	NITMOv2_1450	-	conserved exported protein of unknown function	890.587	229.839	9.12303	2.35444	3.18951	156	41.5906	0.349455	0.293095	0.625376	0.287742	0.27592	0.292012	4.7549	0.092787	0.617878	41.5906	0.349455	0.293095	1.19229	0.233147	0.817217	41.5906	0.625376	0.287742	2.17339	0.0297509	0.310716	41.5906	0.974831	0.502125
NITMOv2_RS22515	NZ_CP011801	1132648	1133586	+	939	50S ribosomal protein L7/L12	640.186	860.35	891.327	865.428	752.55	1194.67	1131.86	759.97	908.439	NITMOv2_1198	rplJL	Fused 50S ribosomal proteins L10 and L7/L12 (Modular protein)	889.42	177.252	9.11107	1.81574	3.18762	157	44.6474	0.338656	0.287031	0.165624	0.290612	-0.173031	0.294264	1.3948	0.497879	0.890786	44.6474	0.338656	0.287031	1.17986	0.238056	0.817217	44.6474	0.165624	0.290612	0.569917	0.568734	0.832844	44.6474	0.50428	0.497084
NITMOv2_RS03755	NZ_CP011801	769190	770401	-	1212	ferredoxin oxidoreductase	684.461	733.214	805.651	935.895	793.582	943.719	986.526	930.666	1143.7	NITMOv2_0814	porA	Pyruvateferredoxin oxidoreductase alpha subunit	884.157	142.854	9.05716	1.46338	3.17906	158	57.2783	0.373996	0.250286	0.388638	0.250186	0.014642	0.253117	3.10641	0.211569	0.699872	57.2783	0.373996	0.250286	1.49428	0.135103	0.677738	57.2783	0.388638	0.250186	1.5534	0.120328	0.539549	57.2783	0.762635	0.431745
NITMOv2_RS00735	NZ_CP011801	168184	171195	-	3012	PAS domain S-box protein	886.135	1005.81	964.84	663.257	873.269	817.909	1080.64	909.478	743.422	NITMOv2_0173	-	putative Histidine kinase	882.751	129.253	9.04276	1.32405	3.17676	159	141.616	-0.173457	0.191914	-0.135291	0.191608	0.0381656	0.197369	0.923864	0.630065	0.917781	141.616	-0.173457	0.191914	-0.903826	0.366088	0.890601	141.616	-0.135291	0.191608	-0.706081	0.480138	0.792845	141.616	-0.308748	0.328839
NITMOv2_RS03015	NZ_CP011801	622408	622650	+	243	30S ribosomal protein S18	742.142	914.255	956.74	557.364	1050.11	724.145	182.239	1610.43	1140.88	NITMOv2_0653	rpsR	30S ribosomal subunit protein S18	875.367	398.694	8.96712	4.08416	3.16464	160	11.2655	-0.0607517	0.560553	0.0845217	0.554759	0.145273	0.57672	0.0642891	0.968367	na	11.2655	-0.0607517	0.560553	-0.108378	0.913696	na	11.2655	0.0845217	0.554759	0.152357	0.878905	na	11.2655	0.02377	0.954646
NITMOv2_RS17360	NZ_CP011801	3576055	3576825	-	771	outer membrane protein assembly factor BamD	1403.43	943.037	889.545	614.835	941.989	713.227	861.557	865.852	636.172	NITMOv2_3779	-	conserved protein of unknown function	874.405	234.446	8.95726	2.40163	3.16306	161	36.0544	-0.422918	0.318544	-0.546186	0.322012	-0.123267	0.33916	3.37233	0.185229	0.681664	36.0544	-0.422918	0.318544	-1.32766	0.184291	0.763156	36.0544	-0.546186	0.322012	-1.69616	0.0898547	0.48724	36.0544	-0.969104	0.543411
NITMOv2_RS16385	NZ_CP011801	3366953	3367471	-	519	16S rRNA processing protein RimM	857.11	583.72	828.714	1141.71	869.879	1271.44	810.594	842.726	616.347	NITMOv2_3566	rimM	Ribosome maturation factor RimM	869.138	220.061	8.90331	2.25427	3.15434	162	24.3558	0.611045	0.352398	-0.106413	0.373778	-0.717459	0.372608	4.64547	0.0980052	0.62112	24.3558	0.611045	0.352398	1.73397	0.0829242	0.587395	24.3558	-0.106413	0.373778	-0.284697	0.775877	na	24.3558	0.504632	0.62366
NITMOv2_RS05420	NZ_CP011801	1110257	1110640	-	384	hypothetical protein	469.637	841.53	908.156	396.795	715.641	1661.15	1037.91	839.261	888.567	NITMOv2_1168	-	protein of unknown function	862.071	364.887	8.83092	3.73784	3.14256	163	17.5474	0.392754	0.46477	0.260784	0.46908	-0.13197	0.473493	0.742383	0.689912	na	17.5474	0.392754	0.46477	0.845051	0.398082	na	17.5474	0.260784	0.46908	0.555948	0.578246	na	17.5474	0.653538	0.804922
NITMOv2_RS22395	NZ_CP011801	324280	325032	+	753	hypothetical protein	926.051	938.758	1049.75	539.599	782.032	876.331	852.747	1008.83	764.663	NITMOv2_0340	-	conserved protein of unknown function	859.862	152.833	8.80829	1.5656	3.13886	164	34.3963	-0.321747	0.305415	-0.233254	0.303246	0.0884924	0.321234	1.2395	0.538079	0.894921	34.3963	-0.321747	0.305415	-1.05347	0.292123	0.831599	34.3963	-0.233254	0.303246	-0.769191	0.44178	0.783804	34.3963	-0.555001	0.516993
NITMOv2_RS19225	NZ_CP011801	3951697	3951927	-	231	ATP synthase F0 subunit C	884.787	786.885	1056.76	732.897	849.741	1142.64	1150.23	298.958	830.868	NITMOv2_4180	atpE	ATP synthase F0, subunit C	859.309	259.97	8.80262	2.66309	3.13793	165	10.6687	0.0742533	0.524153	-0.333548	0.544496	-0.407801	0.561158	0.594471	0.742869	na	10.6687	0.0742533	0.524153	0.141663	0.887346	na	10.6687	-0.333548	0.544496	-0.612581	0.540154	na	10.6687	-0.259295	0.909685
NITMOv2_RS16395	NZ_CP011801	3367871	3369217	-	1347	signal recognition particle protein	839.001	944.613	957.912	703.843	801.482	963.444	772.587	957.019	775.764	NITMOv2_3569	ffh	Signal Recognition Particle protein	857.296	99.8629	8.782	1.02298	3.13455	166	61.5891	-0.0515997	0.236722	-0.205409	0.239788	-0.153809	0.248357	0.772527	0.679591	0.926213	61.5891	-0.0515997	0.236722	-0.217976	0.827448	0.980274	61.5891	-0.205409	0.239788	-0.856626	0.391652	0.746465	61.5891	-0.257008	0.406682
NITMOv2_RS10235	NZ_CP011801	2077139	2077525	+	387	hypothetical protein	838.793	835.006	1111.38	787.438	659.372	682.044	743.789	892.238	1102.1	NITMOv2_2217	-	conserved exported protein of unknown function	850.239	163.458	8.70971	1.67444	3.12263	167	17.5422	-0.281277	0.41331	-0.106673	0.406893	0.174605	0.432421	0.474936	0.788622	na	17.5422	-0.281277	0.41331	-0.680548	0.496157	na	17.5422	-0.106673	0.406893	-0.262164	0.793195	na	17.5422	-0.38795	0.696983
NITMOv2_RS07895	NZ_CP011801	1605822	1606169	-	348	4Fe-4S dicluster domain-containing protein	587.316	406.256	1002.1	924.335	789.673	632.066	1145.28	926.081	1225.61	NITMOv2_1721	yfhL	Uncharacterized ferredoxin-like protein YfhL	848.746	269.201	8.69442	2.75765	3.12009	168	15.7718	0.315142	0.459426	0.610942	0.449748	0.2958	0.458129	1.85616	0.395311	na	15.7718	0.315142	0.459426	0.685947	0.492747	na	15.7718	0.610942	0.449748	1.35841	0.174334	na	15.7718	0.926085	0.785373
NITMOv2_RS03190	NZ_CP011801	649317	650513	+	1197	ATP citrate lyase	693.038	759.275	747.768	820.331	721.534	863.666	850.905	1230.8	944.241	NITMOv2_0690	aclB	ATP-citrate lyase, beta subunit	847.95	163.837	8.68627	1.67832	3.11874	169	53.9886	0.239597	0.256045	0.382582	0.253605	0.142985	0.25899	2.32855	0.312149	0.793943	53.9886	0.239597	0.256045	0.935761	0.349396	0.890601	53.9886	0.382582	0.253605	1.50858	0.131407	0.555954	53.9886	0.62218	0.438946
NITMOv2_RS11110	NZ_CP011801	2234669	2235208	-	540	peptide deformylase	690.192	785.428	688.853	815.145	836.05	855.396	1025.09	1065.73	868.821	NITMOv2_2408	def	Peptide deformylase	847.856	129.723	8.6853	1.32886	3.11858	170	24.408	0.328635	0.349379	0.383079	0.348061	0.0544434	0.354388	1.43026	0.489128	0.890325	24.408	0.328635	0.349379	0.940628	0.346896	0.890601	24.408	0.383079	0.348061	1.10061	0.271067	na	24.408	0.711714	0.600693
NITMOv2_RS05465	NZ_CP011801	1118106	1118315	+	210	hypothetical protein	1030.52	961.748	1107.09	241.856	1028.19	1256.91	421.753	657.707	913.954	NITMOv2_1178	-	conserved protein of unknown function	846.635	335.911	8.67279	3.44102	3.1165	171	9.48226	-0.24599	0.567455	-0.713354	0.594025	-0.467364	0.621589	1.46987	0.479536	na	9.48226	-0.24599	0.567455	-0.433496	0.664654	na	9.48226	-0.713354	0.594025	-1.20088	0.229797	na	9.48226	-0.959344	0.981514
NITMOv2_RS08055	NZ_CP011801	1639488	1640084	-	597	translation elongation factor Ts	1067.34	642.777	1090.4	708.958	789.106	1068.48	667.599	809.739	750.147	NITMOv2_1757	tsf	Elongation factor Ts	843.838	181.598	8.64414	1.86026	3.11172	172	26.9978	-0.0644488	0.343286	-0.43744	0.354848	-0.372991	0.367676	1.70244	0.426893	0.867735	26.9978	-0.0644488	0.343286	-0.187741	0.85108	0.980274	26.9978	-0.43744	0.354848	-1.23275	0.217668	0.616193	26.9978	-0.501889	0.593582
NITMOv2_RS01455	NZ_CP011801	311162	311530	-	369	50S ribosomal protein L20	390.982	328.402	630.048	1422.3	797.927	476.876	900.082	1247.68	1387.03	NITMOv2_0326	rplT	50S ribosomal subunit protein L20	842.37	425.608	8.6291	4.35986	3.10921	173	16.6886	1.11615	0.485526	1.28112	0.481347	0.164964	0.461883	8.05469	0.0178216	na	16.6886	1.11615	0.485526	2.29885	0.0215134	na	16.6886	1.28112	0.481347	2.66153	0.00777875	na	16.6886	2.39727	0.849427
NITMOv2_RS22200	NZ_CP011801	4570035	4570220	+	186	hypothetical protein	323.191	651.507	562.471	637.148	738.726	1182.58	1904.69	742.572	802.576	NITMOv2_4843	-	protein of unknown function	838.384	460.006	8.58827	4.71222	3.10237	174	8.27446	0.854162	0.636467	1.13317	0.624794	0.279005	0.609379	3.48467	0.175111	na	8.27446	0.854162	0.636467	1.34204	0.179584	na	8.27446	1.13317	0.624794	1.81367	0.0697291	na	8.27446	1.98733	1.10434
NITMOv2_RS02195	NZ_CP011801	445393	446154	+	762	nickel pincer cofactor biosynthesis protein LarB	1088.67	980.68	1067.86	488.791	437.918	1068.04	958.906	845.869	587.713	NITMOv2_0481	-	conserved protein of unknown function	836.05	261.785	8.56436	2.68168	3.09835	175	33.8016	-0.584445	0.337683	-0.475312	0.334975	0.109133	0.356341	3.60862	0.164588	0.681664	33.8016	-0.584445	0.337683	-1.73075	0.0834966	0.587395	33.8016	-0.475312	0.334975	-1.41895	0.155914	0.5869	33.8016	-1.05976	0.570523
NITMOv2_RS05210	NZ_CP011801	1064100	1064549	-	450	GatB/YqeY domain-containing protein	1416.01	942.513	929.951	677.197	916.021	488.798	885.681	869.634	379.122	NITMOv2_1125	-	conserved protein of unknown function	833.88	300.218	8.54214	3.07539	3.0946	176	20.0964	-0.555436	0.414445	-0.723754	0.421138	-0.168318	0.447447	3.50316	0.1735	na	20.0964	-0.555436	0.414445	-1.34019	0.180182	na	20.0964	-0.723754	0.421138	-1.71857	0.085693	na	20.0964	-1.27919	0.705715
NITMOv2_RS00980	NZ_CP011801	217502	218980	-	1479	DegQ family serine endoprotease	853.538	969.552	919.577	961.537	1061.75	743.607	763.518	684.833	533.5	NITMOv2_0222	-	putative periplasmic serine endoprotease DegP-like	832.379	165.785	8.52675	1.69828	3.092	177	66.3802	0.135292	0.239647	-0.541075	0.251765	-0.676367	0.256571	7.58808	0.0225045	0.263303	66.3802	0.135292	0.239647	0.564548	0.572381	0.925151	66.3802	-0.541075	0.251765	-2.14913	0.0316242	0.320403	66.3802	-0.405782	0.41929
NITMOv2_RS01320	NZ_CP011801	286737	288254	+	1518	F0F1 ATP synthase subunit alpha	760.329	1051.08	895.951	825.306	594.819	854.913	758.488	803.719	941.248	NITMOv2_0297	atpA	ATP synthase F1, alpha subunit	831.762	128.543	8.52043	1.31677	3.09093	178	67.3831	-0.127504	0.242948	-0.170598	0.243826	-0.0430934	0.25263	0.542874	0.762283	0.9321	67.3831	-0.127504	0.242948	-0.52482	0.599708	0.933726	67.3831	-0.170598	0.243826	-0.69967	0.484134	0.792845	67.3831	-0.298102	0.416087
NITMOv2_RS05600	NZ_CP011801	1146909	1147529	+	621	50S ribosomal protein L3	987.371	910.641	935.941	790.609	695.392	425.042	1426.22	852.583	446.43	NITMOv2_1206	rplC	50S ribosomal subunit protein L3	830.025	301.924	8.50264	3.09286	3.08791	179	27.4731	-0.43982	0.389486	-0.138345	0.381525	0.301475	0.402652	1.31022	0.519385	0.890786	27.4731	-0.43982	0.389486	-1.12923	0.258801	0.818938	27.4731	-0.138345	0.381525	-0.362611	0.716896	0.907911	27.4731	-0.578164	0.657566
NITMOv2_RS16345	NZ_CP011801	3360489	3361817	-	1329	S41 family peptidase	913.689	866.225	1032.11	700.637	930.495	777.884	749.73	675.522	818.364	NITMOv2_3558	ctpA	Carboxy-terminal-processing protease	829.406	116.809	8.49631	1.19657	3.08684	180	59.0725	-0.125347	0.244593	-0.403704	0.250219	-0.278357	0.259489	2.67753	0.262169	0.757376	59.0725	-0.125347	0.244593	-0.512472	0.608321	0.933726	59.0725	-0.403704	0.250219	-1.6134	0.106657	0.534088	59.0725	-0.529051	0.42135
NITMOv2_RS08175	NZ_CP011801	1660220	1661569	+	1350	phosphoglucosamine mutase	908.382	1002.36	895.509	664.656	857.861	716.904	738.067	903.737	742.447	NITMOv2_1782	glmM	phosphoglucosamine mutase	825.546	113.15	8.45676	1.15909	3.08011	181	59.4663	-0.21396	0.240986	-0.307569	0.243023	-0.0936091	0.254092	1.74517	0.417871	0.867735	59.4663	-0.21396	0.240986	-0.887851	0.374621	0.890601	59.4663	-0.307569	0.243023	-1.2656	0.205657	0.606291	59.4663	-0.521529	0.411954
NITMOv2_RS06655	NZ_CP011801	1355365	1356513	-	1149	HD domain-containing protein	837.09	826.149	758.772	766.193	717.51	727.454	1136.97	641.106	1002.25	NITMOv2_1447	-	putative Response regulator with HD domain	823.721	154.76	8.43807	1.58534	3.07691	182	50.5686	-0.0188531	0.276844	0.133524	0.27412	0.152377	0.283397	0.352094	0.838579	0.951754	50.5686	-0.0188531	0.276844	-0.0681002	0.945706	0.980864	50.5686	0.133524	0.27412	0.487101	0.626187	0.859205	50.5686	0.114671	0.472498
NITMOv2_RS04490	NZ_CP011801	910665	910928	-	264	50S ribosomal protein L27	683.108	918.033	484.35	1603.21	520.466	499.907	838.713	959.155	888.567	NITMOv2_0976	rpmA	50S ribosomal protein L27	821.723	348.39	8.4176	3.56885	3.07341	183	11.7103	0.525899	0.543472	0.32223	0.551607	-0.20367	0.552703	0.947507	0.622661	na	11.7103	0.525899	0.543472	0.967666	0.333211	na	11.7103	0.32223	0.551607	0.584166	0.559109	na	11.7103	0.848129	0.945401
NITMOv2_RS00120	NZ_CP011801	26262	27509	+	1248	efflux RND transporter periplasmic adaptor subunit	683.984	922.446	810.354	800.373	802.147	704.997	851.616	866.929	905.654	NITMOv2_0024	-	RND efflux system, membrane fusion protein	816.5	81.7364	8.3641	0.837294	3.06421	184	54.4076	0.0621631	0.25233	0.0594547	0.252555	-0.00270844	0.26041	0.0799788	0.9608	0.992864	54.4076	0.0621631	0.25233	0.246356	0.805407	0.980274	54.4076	0.0594547	0.252555	0.235413	0.813888	0.939778	54.4076	0.121618	0.432546
NITMOv2_RS03420	NZ_CP011801	705213	707270	+	2058	hypothetical protein	736.084	922.493	694.752	649.885	686.729	790.912	1129.69	827.726	901.52	NITMOv2_0737	-	conserved membrane protein of unknown function, Cytochrome bd-type quinol oxidase subunit 1-like	815.533	151.334	8.35419	1.55024	3.0625	185	89.2281	-0.0296684	0.221932	0.223272	0.218658	0.25294	0.225546	1.55208	0.460224	0.874976	89.2281	-0.0296684	0.221932	-0.133682	0.893654	0.980274	89.2281	0.223272	0.218658	1.0211	0.307207	0.680819	89.2281	0.193603	0.378497
NITMOv2_RS03150	NZ_CP011801	643248	644018	+	771	2-oxoglutarate:ferredoxin oxidoreductase	779.682	550.105	618.158	922.253	738.316	998.517	832.839	626.996	1217.03	NITMOv2_0681	forD	2-oxoglutarateferredoxin oxidoredutase delta subunit	809.321	211.608	8.29056	2.16768	3.05147	186	33.5393	0.537499	0.332352	0.376698	0.336027	-0.160801	0.336396	2.74324	0.253696	0.756317	33.5393	0.537499	0.332352	1.61726	0.105823	0.643182	33.5393	0.376698	0.336027	1.12104	0.262273	0.639083	33.5393	0.914197	0.577565
NITMOv2_RS12100	NZ_CP011801	2446654	2448030	+	1377	efflux RND transporter periplasmic adaptor subunit	873.108	733.359	650.021	725.393	627.216	958.427	1061.27	902.734	743.376	NITMOv2_2615	-	putative Heavy metal efflux system, membrane fusion protein	808.323	147.564	8.28033	1.51162	3.04969	187	59.341	0.127925	0.260635	0.181863	0.259877	0.0539379	0.266049	0.521517	0.770467	0.9321	59.341	0.127925	0.260635	0.490821	0.623553	0.935905	59.341	0.181863	0.259877	0.699804	0.484049	0.792845	59.341	0.309788	0.447382
NITMOv2_RS18105	NZ_CP011801	3723062	3723496	-	435	thioredoxin TrxC	829.152	1625.02	855.128	622.71	541.49	556.218	458.111	952.54	784.39	NITMOv2_3946	trxC	thioredoxin	802.751	350.459	8.22325	3.59005	3.03971	188	18.5073	-0.786406	0.429592	-0.630688	0.423528	0.155717	0.460172	4.03848	0.132756	na	18.5073	-0.786406	0.429592	-1.83059	0.0671622	na	18.5073	-0.630688	0.423528	-1.48913	0.136453	na	18.5073	-1.41709	0.718396
NITMOv2_RS03225	NZ_CP011801	660855	661727	+	873	succinate--CoA ligase subunit alpha	729.9	1249.28	732.35	581.784	697.021	730.677	786.257	949.267	757.266	NITMOv2_0697	sucD	succinyl-CoA synthetase alpha chain	801.534	193.212	8.21078	1.97923	3.03752	189	37.1234	-0.296906	0.308484	-0.164496	0.305397	0.132409	0.321793	0.93853	0.625462	0.917781	37.1234	-0.296906	0.308484	-0.962466	0.335816	0.888099	37.1234	-0.164496	0.305397	-0.538631	0.590141	0.832844	37.1234	-0.461402	0.52279
NITMOv2_RS00520	NZ_CP011801	119847	121109	-	1263	serine hydroxymethyltransferase	675.86	1055.41	635.062	817.677	761.537	679.209	683.72	1038.9	861.129	NITMOv2_0125	glyA	serine hydroxymethyltransferase	800.944	157.541	8.20474	1.61382	3.03646	190	53.9267	0.0789349	0.273558	0.0773127	0.273742	-0.00162221	0.280813	0.114036	0.944577	0.992017	53.9267	0.0789349	0.273558	0.288549	0.772926	0.980274	53.9267	0.0773127	0.273742	0.282429	0.777614	0.932653	53.9267	0.156248	0.469767
NITMOv2_RS05700	NZ_CP011801	1156041	1157360	+	1320	preprotein translocase subunit SecY	837.946	1040.44	801.379	538.679	713.782	899.833	654.196	1116.11	533.14	NITMOv2_1226	secY	preprotein translocase membrane subunit	792.833	205.206	8.12166	2.10209	3.02177	191	55.5549	-0.214473	0.278536	-0.294188	0.280162	-0.0797148	0.290499	1.214	0.544984	0.894921	55.5549	-0.214473	0.278536	-0.770004	0.441298	0.925151	55.5549	-0.294188	0.280162	-1.05006	0.293689	0.665118	55.5549	-0.508661	0.477238
NITMOv2_RS18785	NZ_CP011801	3862743	3863147	+	405	hypothetical protein	682.771	698.158	774.96	668.837	872.401	488.798	710.731	909.421	1316.4	NITMOv2_4087	-	conserved protein of unknown function	791.386	231.833	8.10683	2.37486	3.01914	192	17.071	0.0288485	0.433798	0.37286	0.42202	0.344012	0.439375	0.944229	0.623682	na	17.071	0.0288485	0.433798	0.0665021	0.946978	na	17.071	0.37286	0.42202	0.883513	0.376959	na	17.071	0.401709	0.734516
NITMOv2_RS01260	NZ_CP011801	275761	276123	+	363	ribonuclease P protein component	728.648	945.852	960.694	419.75	648.893	1211.9	731.968	824.398	646.23	NITMOv2_0283	rnpA	Ribonuclease P protein component	790.925	228.417	8.10211	2.33987	3.0183	193	15.2467	-0.135643	0.447214	-0.329122	0.455607	-0.193479	0.476105	0.523958	0.769527	na	15.2467	-0.135643	0.447214	-0.303307	0.761656	na	15.2467	-0.329122	0.455607	-0.722383	0.470059	na	15.2467	-0.464766	0.767125
NITMOv2_RS05720	NZ_CP011801	1159252	1159644	+	393	30S ribosomal protein S13	734.211	616.694	798.622	473.866	799.146	391.785	1408.53	878.616	976.745	NITMOv2_1230	rpsM	30S ribosomal subunit protein S13	786.468	299.376	8.05645	3.06676	3.01014	194	16.3594	-0.271372	0.454756	0.515091	0.425711	0.786463	0.456146	3.21056	0.200833	na	16.3594	-0.271372	0.454756	-0.596742	0.550679	na	16.3594	0.515091	0.425711	1.20995	0.226297	na	16.3594	0.243719	0.753655
NITMOv2_RS18320	NZ_CP011801	3763770	3765167	-	1398	sigma-54-dependent Fis family transcriptional regulator	756.794	996.834	823.187	641.836	884.569	944.03	617.696	806.843	564.411	NITMOv2_3989	-	Sensory sigma-54 dependent transcriptional regulator	781.8	149.943	8.00863	1.53599	3.00156	195	58.4658	0.0477295	0.24715	-0.440255	0.256774	-0.487984	0.263449	4.10794	0.128225	0.652275	58.4658	0.0477295	0.24715	0.19312	0.846865	0.980274	58.4658	-0.440255	0.256774	-1.71456	0.0864261	0.48724	58.4658	-0.392525	0.429683
NITMOv2_RS03740	NZ_CP011801	767203	767481	-	279	hypothetical protein	603.29	434.338	333.316	970.892	914.613	473.03	1031.71	660.064	1605.15	NITMOv2_0811	porE	Pyruvateferredoxin oxidoreductase epsilon subunit	780.711	396.491	7.99748	4.06159	2.99955	196	11.6949	0.907826	0.552863	1.19587	0.543203	0.288042	0.528139	5.13004	0.0769177	na	11.6949	0.907826	0.552863	1.64204	0.100581	na	11.6949	1.19587	0.543203	2.20151	0.0276998	na	11.6949	2.10369	0.960481
NITMOv2_RS05615	NZ_CP011801	1148472	1149314	+	843	50S ribosomal protein L2	456.378	527.079	799.78	1004.15	791.68	652.31	1024.36	955.742	758.918	NITMOv2_1209	rplB	50S ribosomal subunit protein L2	774.489	202.035	7.93374	2.06961	2.988	197	34.9732	0.573091	0.328414	0.531307	0.329459	-0.0417844	0.329119	3.74578	0.153679	0.681664	34.9732	0.573091	0.328414	1.74503	0.0809804	0.587395	34.9732	0.531307	0.329459	1.61266	0.106818	0.534088	34.9732	1.1044	0.569631
NITMOv2_RS05940	NZ_CP011801	1203930	1205270	+	1341	hypothetical protein	681.376	843.412	944.861	593.368	819.705	1148.18	610.928	755.308	572.499	NITMOv2_1281	-	putative octaheme cytochrome c	774.405	188.701	7.93288	1.93302	2.98784	198	55.5421	0.140088	0.264086	-0.425227	0.274917	-0.565315	0.280231	4.32363	0.115116	0.633815	55.5421	0.140088	0.264086	0.530465	0.595789	0.93254	55.5421	-0.425227	0.274917	-1.54675	0.121924	0.539549	55.5421	-0.285139	0.460556
NITMOv2_RS03780	NZ_CP011801	773917	775164	+	1248	transcription termination factor Rho	1040.43	954.813	1043.21	624.02	660.592	563.998	620.97	737.812	717.688	NITMOv2_0819	rho	transcription termination factor	773.726	188.251	7.92592	1.92841	2.98658	199	51.5525	-0.609054	0.2564	-0.630331	0.257125	-0.0212772	0.27519	8.40838	0.0149328	0.194127	51.5525	-0.609054	0.2564	-2.37541	0.0175296	0.410193	51.5525	-0.630331	0.257125	-2.45146	0.0142278	0.202878	51.5525	-1.23938	0.433564
NITMOv2_RS05930	NZ_CP011801	1202269	1202715	+	447	ubiquinol-cytochrome c reductase iron-sulfur subunit	995.167	1039.2	676.139	833.24	1097.82	639.702	396.278	823.972	429.374	NITMOv2_1279	-	putative quinol-cytochrome c reductase, iron sulfur subunit	770.1	254.713	7.88878	2.60924	2.9798	200	18.5611	0.0526371	0.407132	-0.792764	0.4404	-0.845401	0.451858	4.29119	0.116999	na	18.5611	0.0526371	0.407132	0.129287	0.89713	na	18.5611	-0.792764	0.4404	-1.8001	0.0718453	na	18.5611	-0.740126	0.717804
NITMOv2_RS20615	NZ_CP011801	4225436	4226605	-	1170	transcription termination/antitermination protein NusA	842.617	586.913	765.024	824.791	637.523	657.997	624.518	1082.12	874.896	NITMOv2_4484	nusA	Transcription elongation protein NusA	766.267	158.658	7.84952	1.62527	2.9726	201	47.8662	0.0503476	0.287608	0.13471	0.286171	0.0843628	0.294322	0.226432	0.892958	0.976083	47.8662	0.0503476	0.287608	0.175056	0.861035	0.980274	47.8662	0.13471	0.286171	0.470734	0.63783	0.86095	47.8662	0.185058	0.492542
NITMOv2_RS09415	NZ_CP011801	1903036	1904001	-	966	acetyl-CoA carboxylase carboxyltransferase subunit alpha	1070.34	836.303	950.649	490.723	853.435	842.493	527.191	619.579	662.286	NITMOv2_2041	accA	acetyl-CoA carboxylase, carboxytransferase, alpha subunit	761.445	196.842	7.80012	2.01642	2.9635	202	39.3987	-0.309558	0.294345	-0.745241	0.30599	-0.435683	0.319871	6.01994	0.0492933	0.419441	39.3987	-0.309558	0.294345	-1.05169	0.292944	0.831599	39.3987	-0.745241	0.30599	-2.43551	0.014871	0.204476	39.3987	-1.0548	0.508153
NITMOv2_RS02375	NZ_CP011801	490452	491768	-	1317	hypothetical protein	675.535	598.08	723.766	745.585	536.556	734.867	857.436	908.903	1052.52	NITMOv2_0519	-	conserved protein of unknown function	759.25	159.161	7.77763	1.63042	2.95933	203	53.228	0.114483	0.264945	0.413658	0.25968	0.299176	0.267238	2.69914	0.259351	0.756317	53.228	0.114483	0.264945	0.4321	0.665669	0.953323	53.228	0.413658	0.25968	1.59296	0.11117	0.539549	53.228	0.528141	0.451489
NITMOv2_RS05555	NZ_CP011801	1131858	1132550	+	693	50S ribosomal protein L1	1023.58	641.166	721.283	757.327	453.195	444.362	798.774	1029.74	953.959	NITMOv2_1197	rplA	50S ribosomal subunit protein L1	758.154	220.995	7.76641	2.26384	2.95725	204	27.9473	-0.413665	0.364308	0.124013	0.349472	0.537678	0.372787	2.25606	0.323671	0.803418	27.9473	-0.413665	0.364308	-1.13548	0.256174	0.818938	27.9473	0.124013	0.349472	0.354856	0.722697	0.912257	27.9473	-0.289653	0.608878
NITMOv2_RS07515	NZ_CP011801	1537493	1537807	+	315	hypothetical protein	496.175	384.699	1033.28	591.204	249.257	628.455	1546.43	292.314	1557.11	NITMOv2_1641	-	conserved protein of unknown function	753.213	507.931	7.71579	5.20317	2.94781	205	12.5742	-0.304669	0.605542	0.741892	0.567442	1.04656	0.600803	3.43184	0.179798	na	12.5742	-0.304669	0.605542	-0.503134	0.61487	na	12.5742	0.741892	0.567442	1.30743	0.191066	na	12.5742	0.437223	1.00816
NITMOv2_RS14930	NZ_CP011801	3068123	3068314	-	192	type II toxin-antitoxin system VapB family antitoxin	1189.75	1051.91	605.437	529.06	511.172	229.124	691.938	1079.05	888.567	NITMOv2_3260	vapB	Antitoxin VapB32	752.89	318.858	7.71248	3.26633	2.94719	206	7.64782	-1.01549	0.653213	-0.170566	0.596416	0.84492	0.680293	2.63581	0.267695	na	7.64782	-1.01549	0.653213	-1.5546	0.120041	na	7.64782	-0.170566	0.596416	-0.285986	0.774889	na	7.64782	-1.18605	1.04976
NITMOv2_RS20695	NZ_CP011801	4239554	4240918	-	1365	HEAT repeat domain-containing protein	916.015	976.545	732.379	558.129	632.73	709.026	665.072	893.806	687.419	NITMOv2_4500	-	conserved protein of unknown function	752.347	142.828	7.70692	1.46311	2.94615	207	54.6259	-0.358357	0.256318	-0.295966	0.255207	0.062391	0.269154	2.33463	0.311201	0.793943	54.6259	-0.358357	0.256318	-1.3981	0.162084	0.722434	54.6259	-0.295966	0.255207	-1.15971	0.246167	0.639083	54.6259	-0.654324	0.434989
NITMOv2_RS01465	NZ_CP011801	311801	312310	-	510	translation initiation factor IF-3	447.904	475.217	364.687	763.507	538.836	1164.49	824.899	947.871	1212.63	NITMOv2_0328	infC	protein chain initiation factor IF-3	748.894	314.362	7.67154	3.22027	2.93952	208	20.3404	1.04096	0.414864	1.15416	0.412127	0.1132	0.396489	9.19631	0.0100704	na	20.3404	1.04096	0.414864	2.50915	0.0121023	na	20.3404	1.15416	0.412127	2.80048	0.00510265	na	20.3404	2.19511	0.725754
NITMOv2_RS03200	NZ_CP011801	652477	654723	+	2247	aconitate hydratase	770.48	746.029	724.261	708.239	628.967	665.653	748.907	932.263	806.709	NITMOv2_0692	acnA	Aconitate hydratase	747.945	87.3242	7.66183	0.894535	2.93769	209	89.562	-0.050823	0.210274	0.0721587	0.208649	0.122982	0.215828	0.329444	0.848129	0.951857	89.562	-0.050823	0.210274	-0.241699	0.809014	0.980274	89.562	0.0721587	0.208649	0.345837	0.729465	0.913993	89.562	0.0213358	0.359052
NITMOv2_RS18675	NZ_CP011801	3839323	3839670	-	348	ferredoxin	587.316	1218.77	400.841	535.141	789.673	695.273	763.518	1124.53	612.805	NITMOv2_4063	fdx	2Fe-2S ferredoxin	747.54	268.811	7.65768	2.75366	2.93691	210	13.7738	0.0393374	0.495166	0.163553	0.49067	0.124215	0.508073	0.129192	0.937446	na	13.7738	0.0393374	0.495166	0.0794429	0.93668	na	13.7738	0.163553	0.49067	0.333325	0.738889	na	13.7738	0.20289	0.84484
NITMOv2_RS03295	NZ_CP011801	676483	677100	+	618	DUF47 domain-containing protein	1206.16	849.7	808.817	602.683	571.719	462.697	609.085	744.975	862.686	NITMOv2_0712	-	conserved protein of unknown function	746.503	220.789	7.64705	2.26173	2.9349	211	24.619	-0.699422	0.368859	-0.455773	0.360741	0.243649	0.391197	3.95097	0.138694	0.676133	24.619	-0.699422	0.368859	-1.89618	0.0579368	0.575837	24.619	-0.455773	0.360741	-1.26344	0.206433	0.606291	24.619	-1.1552	0.615912
NITMOv2_RS20330	NZ_CP011801	4165085	4165375	-	291	twin-arginine translocase TatA/TatE family subunit	1363.4	971.663	639.142	290.892	809.444	529.111	532.626	870.162	659.555	NITMOv2_4426	tatA	Sec-independent protein translocase protein TatA	740.666	310.216	7.58726	3.17781	2.92358	212	11.4598	-0.788283	0.535736	-0.61586	0.527058	0.172422	0.574449	2.60108	0.272385	na	11.4598	-0.788283	0.535736	-1.4714	0.141183	na	11.4598	-0.61586	0.527058	-1.16849	0.242611	na	11.4598	-1.40414	0.894212
NITMOv2_RS10390	NZ_CP011801	2102730	2103026	+	297	hypothetical protein	445.285	1020.04	626.23	627.034	660.909	444.362	820.075	852.583	1148.85	NITMOv2_2252	-	conserved protein of unknown function	738.374	242.607	7.56379	2.48522	2.91911	213	11.6221	-0.0941974	0.522304	0.416509	0.500031	0.510706	0.527526	1.1211	0.570896	na	11.6221	-0.0941974	0.522304	-0.18035	0.856878	na	11.6221	0.416509	0.500031	0.832967	0.404863	na	11.6221	0.322311	0.876002
NITMOv2_RS03050	NZ_CP011801	627711	627944	+	234	acyl carrier protein	513.791	1035.73	1241.92	1085.25	754.962	657.997	946.24	196.75	182.27	NITMOv2_0660	acpP	acyl carrier protein (ACP)	734.99	381.64	7.52912	3.90946	2.91248	214	9.32278	-0.0156102	0.586924	-1.13044	0.651638	-1.11483	0.668347	3.66204	0.16025	na	9.32278	-0.0156102	0.586924	-0.0265966	0.978781	na	9.32278	-1.13044	0.651638	-1.73477	0.0827812	na	9.32278	-1.14605	1.04477
NITMOv2_RS06645	NZ_CP011801	1353258	1353656	+	399	thioredoxin	783.434	759.275	699.212	551.602	393.564	716.659	998.888	750.016	962.057	NITMOv2_1445	trxA	Thioredoxin	734.967	185.803	7.52889	1.90334	2.91244	215	15.5462	-0.333732	0.445504	0.204289	0.423898	0.538021	0.455984	1.40921	0.494303	na	15.5462	-0.333732	0.445504	-0.749112	0.45379	na	15.5462	0.204289	0.423898	0.481929	0.629856	na	15.5462	-0.129444	0.740544
NITMOv2_RS08090	NZ_CP011801	1644918	1645370	-	453	bifunctional nuclease family protein	796.205	1203.78	230.948	336.356	693.298	631.229	684.301	1117.96	894.451	NITMOv2_1764	-	conserved protein of unknown function	732.058	320.851	7.49908	3.28675	2.90671	216	17.4757	-0.291068	0.501159	0.241958	0.48432	0.533026	0.508528	1.10413	0.575761	na	17.4757	-0.291068	0.501159	-0.580791	0.561382	na	17.4757	0.241958	0.48432	0.499582	0.617369	na	17.4757	-0.0491107	0.844305
NITMOv2_RS20645	NZ_CP011801	4229474	4229821	+	348	4Fe-4S dicluster domain-containing protein	760.056	580.365	334.034	827.037	733.268	568.86	763.518	793.784	1225.61	NITMOv2_4490	yfhL	Uncharacterized ferredoxin-like protein YfhL	731.837	241.419	7.49682	2.47306	2.90628	217	13.6371	0.472085	0.492742	0.665959	0.48613	0.193874	0.489427	1.96731	0.373941	na	13.6371	0.472085	0.492742	0.958077	0.338024	na	13.6371	0.665959	0.48613	1.36992	0.170712	na	13.6371	1.13804	0.847759
NITMOv2_RS22400	NZ_CP011801	558947	559681	+	735	hypothetical protein	1210.45	632.006	268.864	575.848	747.772	1047.42	512.128	563.748	986.49	na	-	na	727.192	299.738	7.44924	3.07046	2.89709	218	28.734	0.238088	0.437844	-0.116884	0.445456	-0.354972	0.450468	0.65561	0.720503	0.9321	28.734	0.238088	0.437844	0.543774	0.586597	0.93254	28.734	-0.116884	0.445456	-0.262391	0.79302	0.93609	28.734	0.121204	0.759839
NITMOv2_RS03435	NZ_CP011801	708619	709560	+	942	hypothetical protein	484.992	557.447	678.707	718.893	625.128	560.405	963.718	1050.79	882.907	NITMOv2_0740	-	putative nitrite oxidoreductase, membrane subunit	724.777	197.796	7.4245	2.02619	2.89229	219	36.2484	0.26311	0.30811	0.670675	0.29925	0.407566	0.306083	5.1301	0.0769155	0.562445	36.2484	0.26311	0.30811	0.853946	0.393135	0.897498	36.2484	0.670675	0.29925	2.24118	0.0250141	0.305572	36.2484	0.933785	0.52467
NITMOv2_RS04035	NZ_CP011801	824977	825453	+	477	bacterioferritin	554.506	550.435	560.505	958.298	658.415	599.469	696.29	820.41	1117.69	NITMOv2_0876	bfrB	Bacterioferritin	724.002	201.664	7.41656	2.06581	2.89075	220	18.5168	0.540347	0.415171	0.589133	0.41394	0.0487865	0.414605	2.47892	0.289541	na	18.5168	0.540347	0.415171	1.3015	0.193086	na	18.5168	0.589133	0.41394	1.42323	0.154669	na	18.5168	1.12948	0.718004
NITMOv2_RS16635	NZ_CP011801	3413814	3415067	-	1254	hypothetical protein	613.599	756.974	732.318	742.541	579.165	894.57	741.599	715.925	697.248	NITMOv2_3618	-	conserved protein of unknown function	719.327	89.8986	7.36867	0.920907	2.8814	221	48.2381	0.185924	0.265028	-0.031521	0.26966	-0.217445	0.275686	0.749587	0.687431	0.929113	48.2381	0.185924	0.265028	0.701524	0.482976	0.925151	48.2381	-0.031521	0.26966	-0.116891	0.906946	0.978079	48.2381	0.154403	0.45816
NITMOv2_RS02905	NZ_CP011801	601956	602669	+	714	YggS family pyridoxal phosphate-dependent enzyme	589.348	707.168	1074.52	616.496	852.24	646.938	527.191	741.532	716.827	NITMOv2_0630	yggS	putative enzyme	719.14	163.593	7.36676	1.67582	2.88103	222	27.4644	-0.0654044	0.348702	-0.339672	0.356923	-0.274267	0.369738	0.987063	0.610467	0.917781	27.4644	-0.0654044	0.348702	-0.187565	0.851217	0.980274	27.4644	-0.339672	0.356923	-0.951666	0.341266	0.714213	27.4644	-0.405076	0.601056
NITMOv2_RS03930	NZ_CP011801	801867	802880	+	1014	ketol-acid reductoisomerase	640.262	717.043	791.009	634.455	735.604	585.69	524.071	908.076	925.371	NITMOv2_0855	ilvC	Ketol-acid reductoisomerase	717.954	138.253	7.3546	1.41624	2.87865	223	38.7978	-0.0232505	0.301694	0.0583176	0.300039	0.0815681	0.310977	0.0739493	0.963701	0.992864	38.7978	-0.0232505	0.301694	-0.0770667	0.938571	0.980864	38.7978	0.0583176	0.300039	0.194367	0.845889	0.951825	38.7978	0.035067	0.515148
NITMOv2_RS20770	NZ_CP011801	4254407	4254937	-	531	hypothetical protein	860.381	760.705	700.528	605.779	665.39	538.506	875.673	1170.49	281.128	NITMOv2_4518	-	conserved protein of unknown function	717.621	247.601	7.35119	2.53638	2.87798	224	20.2362	-0.249253	0.424103	-0.0931721	0.419296	0.156081	0.44002	0.350031	0.839444	na	20.2362	-0.249253	0.424103	-0.587717	0.556722	na	20.2362	-0.0931721	0.419296	-0.222211	0.82415	na	20.2362	-0.342425	0.719533
NITMOv2_RS02960	NZ_CP011801	612062	613003	+	942	ribose-phosphate pyrophosphokinase	446.703	600.327	505.945	539.17	458.427	770.557	940.213	1392.91	792.352	NITMOv2_0641	prsA	Ribose-phosphate pyrophosphokinase	716.29	305.149	7.33756	3.12589	2.8753	225	35.4791	0.298769	0.328394	0.941659	0.314873	0.64289	0.321213	9.51278	0.00859661	0.134107	35.4791	0.298769	0.328394	0.909789	0.362934	0.890601	35.4791	0.941659	0.314873	2.9906	0.00278434	0.0765694	35.4791	1.24043	0.557493
NITMOv2_RS06560	NZ_CP011801	1336053	1336772	-	720	hypothetical protein	918.401	617.122	565.075	658.386	899.663	549.898	522.798	895.212	799.71	NITMOv2_1429	-	conserved protein of unknown function	714.029	163.775	7.3144	1.67769	2.87074	226	27.5427	0.104155	0.359	-0.0151551	0.36241	-0.11931	0.372046	0.125296	0.939274	0.992017	27.5427	0.104155	0.359	0.290126	0.77172	0.980274	27.5427	-0.0151551	0.36241	-0.0418175	0.966644	0.98957	27.5427	0.089	0.618082
NITMOv2_RS05935	NZ_CP011801	1202771	1203817	+	1047	hypothetical protein	597.116	597.993	699.462	452.758	731.167	840.34	676.738	879.455	936.941	NITMOv2_1280	-	putative quinol-cytochrome c reductase, cytochrome b subunit	712.441	154.224	7.29813	1.57984	2.86753	227	39.6229	0.174635	0.299809	0.31589	0.296968	0.141255	0.304427	1.14126	0.565169	0.89776	39.6229	0.174635	0.299809	0.582485	0.56024	0.925151	39.6229	0.31589	0.296968	1.06372	0.287458	0.665118	39.6229	0.490524	0.513299
NITMOv2_RS06205	NZ_CP011801	1257280	1260249	+	2970	hypothetical protein	752.937	632.422	814.099	655.536	627.864	585.076	738.067	914.589	682.132	NITMOv2_1342	-	putative NHL repeat protein	711.414	104.535	7.28761	1.07084	2.86544	228	112.594	-0.132154	0.205059	-0.00398107	0.203647	0.128173	0.210214	0.522376	0.770136	0.9321	112.594	-0.132154	0.205059	-0.644469	0.519272	0.925151	112.594	-0.00398106	0.203647	-0.0195488	0.984403	0.994032	112.594	-0.136135	0.350504
NITMOv2_RS02930	NZ_CP011801	605479	605778	-	300	hypothetical protein	841.589	740.546	426.228	677.197	1046.88	366.598	590.454	920.789	781.939	NITMOv2_0635	-	conserved protein of unknown function	710.247	222.251	7.27565	2.2767	2.86308	229	11.4159	0.191221	0.52663	0.12031	0.53006	-0.0709117	0.543328	0.13604	0.934242	na	11.4159	0.191221	0.52663	0.363103	0.716528	na	11.4159	0.12031	0.53006	0.226973	0.820445	na	11.4159	0.311531	0.906312
NITMOv2_RS16380	NZ_CP011801	3366164	3366949	-	786	tRNA (guanosine(37)-N1)-methyltransferase TrmD	871.875	796.563	680.308	538.484	599.359	895.508	788.774	585.744	624.032	NITMOv2_3565	trmD	tRNA (guanine-1-)-methyltransferase	708.961	132.135	7.26248	1.35357	2.86046	230	29.7711	-0.120806	0.32822	-0.305847	0.333792	-0.18504	0.347815	0.844965	0.655418	0.920639	29.7711	-0.120806	0.32822	-0.368065	0.712825	0.958372	29.7711	-0.305847	0.333792	-0.916279	0.35952	0.727531	29.7711	-0.426653	0.563308
NITMOv2_RS05730	NZ_CP011801	1160139	1160765	+	627	30S ribosomal protein S4	594.424	579.81	797.207	1026.06	532.206	701.624	741.599	477.283	884.315	NITMOv2_1232	rpsD	30S ribosomal subunit protein S4	703.836	178.425	7.20998	1.82776	2.85	231	23.8002	0.313879	0.382574	0.0178407	0.391116	-0.296039	0.396588	0.833098	0.659318	0.921077	23.8002	0.313879	0.382574	0.820441	0.411965	0.916498	23.8002	0.0178407	0.391116	0.045615	0.963617	na	23.8002	0.33172	0.664369
NITMOv2_RS16390	NZ_CP011801	3367486	3367776	-	291	30S ribosomal protein S16	413.151	694.045	519.303	639.963	944.351	982.635	608.715	711.95	806.122	NITMOv2_3567	rpsP	30S ribosomal protein S16	702.248	186.365	7.19372	1.90909	2.84674	232	10.9529	0.786161	0.507823	0.350167	0.526906	-0.435994	0.518256	2.42104	0.298043	na	10.9529	0.786161	0.507823	1.5481	0.121598	na	10.9529	0.350167	0.526906	0.664573	0.506324	na	10.9529	1.13633	0.895789
NITMOv2_RS03205	NZ_CP011801	654754	656985	+	2232	NADP-dependent isocitrate dehydrogenase	592.517	741.994	624.967	834.36	589.222	729.255	684.498	773.512	735.695	NITMOv2_0693	idh	Isocitrate dehydrogenase (NADP(+))	700.669	84.44	7.17754	0.864989	2.84349	233	83.7385	0.263335	0.222749	0.0990657	0.225123	-0.16427	0.228447	1.42335	0.49082	0.890325	83.7385	0.263335	0.222749	1.18221	0.237124	0.817217	83.7385	0.0990657	0.225123	0.440051	0.6599	0.877705	83.7385	0.362401	0.385236
NITMOv2_RS05705	NZ_CP011801	1157362	1158018	+	657	adenylate kinase	603.88	614.816	601.567	463.834	567.658	669.586	1145.86	946.016	681.64	NITMOv2_1227	adk	Adenylate kinase	699.428	212.146	7.16483	2.17318	2.84093	234	24.2929	-0.00405825	0.367377	0.529877	0.351924	0.533936	0.368282	2.97632	0.225788	0.703555	24.2929	-0.00405825	0.367377	-0.0110466	0.991186	0.993309	24.2929	0.529877	0.351924	1.50566	0.132155	na	24.2929	0.525819	0.618061
NITMOv2_RS21025	NZ_CP011801	4318919	4319656	+	738	hypothetical protein	765.673	711.537	929.321	894.671	452.159	596.095	630.057	592.649	693.515	NITMOv2_4574	-	conserved protein of unknown function	696.187	151.443	7.13162	1.55136	2.83423	235	27.5986	-0.188402	0.348657	-0.410606	0.355497	-0.222204	0.3708	1.35914	0.506835	0.890786	27.5986	-0.188402	0.348657	-0.540366	0.588945	0.93254	27.5986	-0.410606	0.355497	-1.15502	0.248082	0.639083	27.5986	-0.599008	0.598654
NITMOv2_RS01480	NZ_CP011801	314530	314802	-	273	HU family DNA-binding protein	396.353	1701.55	468.382	744.173	647.11	241.713	729.957	674.571	624.926	NITMOv2_0330	hupB	HU, DNA-binding transcriptional regulator, beta subunit	692.082	413.877	7.08958	4.23969	2.8257	236	10.0468	-0.417282	0.613474	-0.325618	0.609461	0.0916641	0.643784	0.528197	0.767898	na	10.0468	-0.417282	0.613474	-0.680195	0.496381	na	10.0468	-0.325618	0.609461	-0.534272	0.593153	na	10.0468	-0.742901	1.03977
NITMOv2_RS03410	NZ_CP011801	703302	704414	+	1113	cytochrome bc complex cytochrome b subunit	680.53	925.456	793.759	410.699	458.539	434.78	676.396	827.304	1015.5	NITMOv2_0735	-	putative Quinol-cytochrome c reductase, cytochrome b subunit	691.441	220.224	7.08301	2.25594	2.82436	237	40.6222	-0.758061	0.301161	0.0130678	0.281583	0.771129	0.309641	7.98168	0.0184842	0.22181	40.6222	-0.758061	0.301161	-2.51713	0.0118315	0.301159	40.6222	0.0130678	0.281583	0.0464082	0.962985	0.98957	40.6222	-0.744993	0.494061
NITMOv2_RS16315	NZ_CP011801	3354781	3356280	-	1500	proteasome accessory factor PafA2	641.211	821.333	790.459	474.038	719.73	659.877	634.738	798.017	639.768	NITMOv2_3552	dop	Pup deamidase/depupylase	686.575	109.139	7.03316	1.118	2.81417	238	54.7849	-0.176442	0.255303	-0.190176	0.255757	-0.0137331	0.266849	0.714065	0.69975	0.929113	54.7849	-0.176442	0.255303	-0.691109	0.489497	0.925151	54.7849	-0.190176	0.255757	-0.743578	0.457132	0.792845	54.7849	-0.366618	0.435861
NITMOv2_RS16340	NZ_CP011801	3360035	3360511	+	477	histidinol-phosphatase	831.759	1058.53	828.573	425.91	534.963	737.808	696.29	386.075	670.616	NITMOv2_3557	-	putative DNA polymerase IV, family X (N-terminal)	685.614	213.246	7.02331	2.18445	2.81215	239	17.4358	-0.577868	0.416403	-0.682815	0.421386	-0.104947	0.45281	3.29711	0.192328	na	17.4358	-0.577868	0.416403	-1.38776	0.16521	na	17.4358	-0.682815	0.421386	-1.6204	0.105146	na	17.4358	-1.26068	0.704896
NITMOv2_RS01605	NZ_CP011801	340319	341023	+	705	1-acyl-sn-glycerol-3-phosphate acyltransferase	886.781	773.491	906.868	600.352	556.851	717.597	659.549	457.129	604.982	NITMOv2_0358	-	putative Acyltransferase	684.844	150.581	7.01544	1.54253	2.81053	240	25.877	-0.361425	0.339505	-0.655802	0.34992	-0.294377	0.369905	3.68055	0.158774	0.681664	25.877	-0.361425	0.339505	-1.06457	0.287072	0.831599	25.877	-0.655802	0.34992	-1.87415	0.0609103	0.434268	25.877	-1.01723	0.581881
NITMOv2_RS05610	NZ_CP011801	1148158	1148445	+	288	50S ribosomal protein L23	1085.38	701.275	887.974	646.629	613.407	458.248	1076.35	319.718	370.236	NITMOv2_1208	rplW	50S ribosomal subunit protein L23	684.358	284.042	7.01045	2.90968	2.80951	241	10.5942	-0.53631	0.545616	-0.688979	0.554328	-0.152669	0.591579	1.86003	0.394547	na	10.5942	-0.53631	0.545616	-0.982944	0.325635	na	10.5942	-0.688979	0.554328	-1.24291	0.213901	na	10.5942	-1.22529	0.927354
NITMOv2_RS22540	NZ_CP011801	1252718	1253176	-	459	hypothetical protein	523.865	352.012	734.439	627.034	898.059	718.821	1157.75	351.063	789.837	na	-	na	683.654	258.643	7.00324	2.6495	2.80802	242	16.8645	0.545721	0.460967	0.415586	0.465256	-0.130135	0.465582	1.52554	0.466373	na	16.8645	0.545721	0.460967	1.18386	0.236467	na	16.8645	0.415586	0.465256	0.893241	0.371728	na	16.8645	0.961307	0.800712
NITMOv2_RS05995	NZ_CP011801	1219122	1219421	-	300	co-chaperone GroES	520.984	1211.8	581.22	451.465	588.87	1466.39	590.454	383.662	355.427	NITMOv2_1294	groS	Cpn10 chaperonin GroES, small subunit of GroESL	683.364	386.957	7.00027	3.96393	2.80741	243	10.9644	0.232731	0.541257	-0.817659	0.594163	-1.05039	0.60337	3.23981	0.197917	na	10.9644	0.232731	0.541257	0.429982	0.667209	na	10.9644	-0.817659	0.594163	-1.37615	0.168775	na	10.9644	-0.584928	0.963288
NITMOv2_RS16260	NZ_CP011801	3342758	3343651	+	894	UTP--glucose-1-phosphate uridylyltransferase	753.1	926.248	585.12	435.557	526.953	713.514	767.788	798.223	620.208	NITMOv2_3541	galU	UTP--glucose-1-phosphate uridylyltransferase	680.746	151.878	6.97345	1.55582	2.80187	244	32.2649	-0.325635	0.324407	-0.108741	0.318716	0.216894	0.337681	1.01983	0.600546	0.909564	32.2649	-0.325635	0.324407	-1.00378	0.315483	0.861737	32.2649	-0.108741	0.318716	-0.341183	0.732966	0.913993	32.2649	-0.434375	0.547368
NITMOv2_RS08370	NZ_CP011801	1706593	1708026	+	1434	dihydrolipoyl dehydrogenase	519.81	478.862	624.183	637.529	615.973	766.942	880.122	802.64	773.313	NITMOv2_1820	lpd	Dihydrolipoyl dehydrogenase	677.708	135.298	6.94233	1.38597	2.79542	245	51.8006	0.405019	0.260355	0.510166	0.258615	0.105147	0.261316	4.32698	0.114923	0.633815	51.8006	0.405019	0.260355	1.55565	0.119793	0.672526	51.8006	0.510166	0.258615	1.97268	0.0485316	0.397546	51.8006	0.915186	0.448382
NITMOv2_RS03195	NZ_CP011801	650605	652425	+	1821	ATP citrate lyase	699.839	743.097	689.42	771.655	463.508	471.082	717.397	809.04	726.078	NITMOv2_0691	aclA	ATP citrate lyase, alpha subunit	676.791	124.228	6.93293	1.27257	2.79347	246	65.7553	-0.187313	0.257014	0.00569353	0.254013	0.193007	0.263866	0.699752	0.704776	0.929113	65.7553	-0.187313	0.257014	-0.728806	0.466121	0.925151	65.7553	0.00569353	0.254013	0.0224143	0.982117	0.994032	65.7553	-0.18162	0.437644
NITMOv2_RS17990	NZ_CP011801	3705151	3705810	-	660	DNA-binding response regulator	455.405	918.033	634.058	743.891	386.632	533.234	771.616	767.324	840.099	NITMOv2_3918	devR	Transcriptional regulatory protein DevR (DosR)	672.255	180.973	6.88647	1.85386	2.78376	247	23.5819	-0.104605	0.38632	0.210624	0.377244	0.315229	0.394463	0.677611	0.712621	0.930513	23.5819	-0.104605	0.38632	-0.270773	0.786565	0.980274	23.5819	0.210624	0.377244	0.558322	0.576625	na	23.5819	0.106018	0.653844
NITMOv2_RS10230	NZ_CP011801	2076619	2076846	+	228	hypothetical protein	369.118	885.821	1121.65	519.778	602.645	482.366	582.685	1009.64	467.667	NITMOv2_2216	-	protein of unknown function	671.263	266.296	6.87631	2.7279	2.78164	248	8.0985	-0.438467	0.61757	-0.27924	0.608728	0.159227	0.652096	0.539149	0.763704	na	8.0985	-0.438467	0.61757	-0.709989	0.477711	na	8.0985	-0.27924	0.608728	-0.458727	0.64643	na	8.0985	-0.717708	1.03858
NITMOv2_RS02970	NZ_CP011801	613840	614421	+	582	aminoacyl-tRNA hydrolase	846.96	728.747	778.954	523.606	573.356	1096.02	532.626	593.292	366.419	NITMOv2_0643	pth	Peptidyl-tRNA hydrolase	671.109	216.738	6.87473	2.22023	2.7813	249	20.9288	-0.0332114	0.38143	-0.748239	0.408088	-0.715027	0.421087	4.00536	0.134973	na	20.9288	-0.0332114	0.38143	-0.0870707	0.930615	na	20.9288	-0.748239	0.408088	-1.83352	0.0667246	na	20.9288	-0.78145	0.668382
NITMOv2_RS09770	NZ_CP011801	1981506	1982177	-	672	hypothetical protein	679.855	721.311	899.507	277.127	584.197	785.568	922.584	616.6	539.487	NITMOv2_2118	-	conserved exported protein of unknown function	669.582	198.164	6.85909	2.02996	2.77802	250	23.8455	-0.417806	0.387317	-0.225165	0.381497	0.192641	0.404787	1.18821	0.552056	0.89776	23.8455	-0.417806	0.387317	-1.07872	0.280714	0.831599	23.8455	-0.225165	0.381497	-0.590215	0.555047	na	23.8455	-0.642972	0.653649
NITMOv2_RS02365	NZ_CP011801	488004	489062	-	1059	LuxR family transcriptional regulator	703.878	572.145	537.861	799.336	463.386	685.425	710.886	847.752	704.812	NITMOv2_0517	aubR	Transcriptional regulator (modular protein)	669.498	123.651	6.85823	1.26666	2.77784	251	37.9044	0.213388	0.30748	0.233616	0.307232	0.0202277	0.313818	0.717072	0.698699	0.929113	37.9044	0.213388	0.30748	0.693991	0.487688	0.925151	37.9044	0.233616	0.307232	0.76039	0.447022	0.78586	37.9044	0.447004	0.528573
NITMOv2_RS05735	NZ_CP011801	1160847	1161845	+	999	DNA-directed RNA polymerase subunit alpha	601.737	768.243	663.254	881.237	727	528.43	443.284	714.326	683.102	NITMOv2_1233	rpoA	RNA polymerase, alpha subunit	667.846	130.271	6.84131	1.33448	2.77427	252	35.9016	0.213129	0.311943	-0.207797	0.322141	-0.420926	0.328151	1.65558	0.437014	0.867735	35.9016	0.213129	0.311943	0.68323	0.494461	0.925151	35.9016	-0.207797	0.322141	-0.645051	0.518894	0.802306	35.9016	0.00533208	0.542663
NITMOv2_RS17295	NZ_CP011801	3559519	3561192	+	1674	dihydroxy-acid dehydratase	883.388	663.572	694.408	566.354	703.549	643.847	595.216	715.069	509.572	NITMOv2_3765	ilvD	Dihydroxy-acid dehydratase	663.886	107.091	6.80074	1.09703	2.76569	253	59.4973	-0.135889	0.250191	-0.39266	0.255243	-0.25677	0.264433	2.41127	0.299501	0.783054	59.4973	-0.135889	0.250191	-0.543142	0.587032	0.93254	59.4973	-0.39266	0.255243	-1.53837	0.123957	0.542312	59.4973	-0.528549	0.430772
NITMOv2_RS20610	NZ_CP011801	4222909	4225425	-	2517	translation initiation factor IF-2	840.681	754.268	706.608	598.635	538.102	454.425	835.714	658.49	584.611	NITMOv2_4483	infB	Translation initiation factor IF-2	663.504	132.779	6.79682	1.36016	2.76486	254	89.0869	-0.415395	0.229402	-0.22432	0.226798	0.191075	0.237266	3.34207	0.188052	0.682237	89.0869	-0.415395	0.229402	-1.81077	0.0701757	0.587395	89.0869	-0.22432	0.226798	-0.989075	0.322627	0.69987	89.0869	-0.639715	0.389654
NITMOv2_RS00895	NZ_CP011801	203301	203624	+	324	YbaB/EbfC family nucleoid-associated protein	630.821	311.678	538.166	731.54	545.25	1018.33	1298.45	426.291	460.738	NITMOv2_0205	ybaB	Nucleoid-associated protein, ybaB	662.363	313.37	6.78514	3.21011	2.76238	255	11.5327	0.684275	0.543691	0.448993	0.552893	-0.235283	0.548393	1.63145	0.442319	na	11.5327	0.684275	0.543691	1.25857	0.208184	na	11.5327	0.448993	0.552893	0.812078	0.416747	na	11.5327	1.13327	0.949656
NITMOv2_RS20590	NZ_CP011801	4220893	4221162	-	270	30S ribosomal protein S15	489.814	224.408	344.426	438.924	290.8	896.13	820.075	1108.36	1342.72	NITMOv2_4479	rpsO	30S ribosomal subunit protein S15	661.74	395.595	6.77875	4.05241	2.76102	256	9.39737	0.64093	0.616834	1.50251	0.581832	0.861577	0.577612	6.99123	0.0303301	na	9.39737	0.64093	0.616834	1.03906	0.298775	na	9.39737	1.50251	0.581832	2.58237	0.00981234	na	9.39737	2.14344	1.0509
NITMOv2_RS06210	NZ_CP011801	1260279	1261745	+	1467	IMP dehydrogenase	696.612	605.764	665.609	842.457	468.313	494.795	754.67	737.51	668.696	NITMOv2_1343	guaB	IMP dehydrogenase	659.381	120.77	6.75459	1.23715	2.75587	257	51.8029	0.0012924	0.283559	0.0517112	0.282804	0.0504188	0.29105	0.0435203	0.978475	0.992864	51.8029	0.0012924	0.283559	0.00455777	0.996363	0.996363	51.8029	0.0517112	0.282804	0.182852	0.854914	0.952929	51.8029	0.0530036	0.485857
NITMOv2_RS00135	NZ_CP011801	32200	32793	+	594	nitroreductase	971.531	918.033	645.8	399.022	594.819	592.482	484.59	736.321	574.427	NITMOv2_0027	-	Nitroreductase	657.447	188.616	6.73478	1.93215	2.75163	258	20.7815	-0.578639	0.387879	-0.572662	0.388012	0.00597736	0.417207	3.1529	0.206708	na	20.7815	-0.578639	0.387879	-1.4918	0.135751	na	20.7815	-0.572662	0.388012	-1.47589	0.139974	na	20.7815	-1.1513	0.654175
NITMOv2_RS04385	NZ_CP011801	890658	891323	+	666	hypothetical protein	649.876	697.484	523.621	838.87	766.298	429.35	631.679	725.847	640.408	NITMOv2_0954	-	conserved exported protein of unknown function	655.937	123.477	6.71931	1.26488	2.74831	259	23.4866	0.265291	0.369976	0.0284954	0.377248	-0.236796	0.384268	0.605864	0.738649	0.9321	23.4866	0.265291	0.369976	0.71705	0.473343	0.925151	23.4866	0.0284954	0.377248	0.0755349	0.939789	na	23.4866	0.293786	0.640885
NITMOv2_RS07505	NZ_CP011801	1534775	1535737	+	963	hydrogenase	399.508	335.563	265.562	879.02	509.58	411.138	919.71	884.455	1284.41	NITMOv2_1639	hupS	putative [NiFe] hydrogenase small subunit	654.327	347.967	6.70282	3.56452	2.74477	260	33.5909	0.985163	0.37127	1.5551	0.361249	0.569938	0.350315	18.5397	9.42e-05	0.00580447	33.5909	0.985163	0.37127	2.6535	0.00796622	0.248546	33.5909	1.5551	0.361249	4.3048	1.67e-05	0.00311164	33.5909	2.54026	0.643399
NITMOv2_RS04525	NZ_CP011801	915549	916562	-	1014	type I glyceraldehyde-3-phosphate dehydrogenase	616.549	776.797	653.442	667.847	619.456	715.843	545.908	612.951	672.997	NITMOv2_0984	gapA	Glyceraldehyde-3-phosphate dehydrogenase	653.532	66.5389	6.69468	0.681614	2.74301	261	35.5011	0.0897818	0.293126	-0.219429	0.301382	-0.309211	0.310353	1.04355	0.593467	0.909564	35.5011	0.0897818	0.293126	0.30629	0.759384	0.980274	35.5011	-0.219429	0.301382	-0.728077	0.466566	0.792845	35.5011	-0.129648	0.507138
NITMOv2_RS01610	NZ_CP011801	341079	342788	+	1710	30S ribosomal protein S1	421.849	578.736	516.64	752.441	792.048	604.566	686.273	726.939	798.151	NITMOv2_0359	rpsA	30S ribosomal subunit protein S1	653.071	130.744	6.68996	1.33932	2.742	262	59.8694	0.634329	0.251178	0.485514	0.253671	-0.148815	0.252476	6.87393	0.0321621	0.342088	59.8694	0.634329	0.251178	2.52542	0.011556	0.301159	59.8694	0.485514	0.253671	1.91395	0.0556269	0.422042	59.8694	1.11984	0.437189
NITMOv2_RS05625	NZ_CP011801	1149684	1150040	+	357	50S ribosomal protein L22	404.124	735.455	586.104	521.65	769.765	739.358	558.202	1031.7	477.885	NITMOv2_1211	rplV	50S ribosomal subunit protein L22	647.138	191.804	6.62917	1.96481	2.72883	263	12.2781	0.36288	0.493212	0.204738	0.500164	-0.158142	0.507295	0.54918	0.759883	na	12.2781	0.36288	0.493212	0.735749	0.461883	na	12.2781	0.204738	0.500164	0.409341	0.682289	na	12.2781	0.567618	0.854106
NITMOv2_RS20530	NZ_CP011801	4205968	4207026	-	1059	threonine synthase	726.584	705.645	724.466	671.442	630.204	664.654	459.985	652.117	583.987	NITMOv2_4467	thrC	Threonine synthase	646.565	83.6173	6.62331	0.856562	2.72755	264	36.7347	-0.0259722	0.287843	-0.426943	0.298688	-0.400971	0.309228	2.42562	0.297361	0.783054	36.7347	-0.0259722	0.287843	-0.0902303	0.928104	0.980274	36.7347	-0.426943	0.298688	-1.4294	0.15289	0.5869	36.7347	-0.452915	0.498512
NITMOv2_RS05690	NZ_CP011801	1155384	1155602	+	219	50S ribosomal protein L30	109.796	553.335	477.715	618.445	627.411	1305.69	808.841	525.565	779.017	NITMOv2_1224	rpmD	50S ribosomal protein L30	645.091	320.045	6.60821	3.27849	2.72426	265	7.55709	1.3031	0.659176	0.886213	0.67811	-0.416889	0.640944	3.98884	0.136092	na	7.55709	1.3031	0.659176	1.97686	0.0480569	na	7.55709	0.886213	0.67811	1.30689	0.191251	na	7.55709	2.18932	1.17383
NITMOv2_RS01140	NZ_CP011801	248733	249038	-	306	hypothetical protein	314.319	264.009	493.847	663.919	641.471	862.585	506.517	1203.65	836.298	NITMOv2_0256	-	conserved exported protein of unknown function	642.957	294.297	6.58634	3.01473	2.71948	266	10.4608	1.07651	0.554668	1.12593	0.553144	0.0494252	0.529283	5.17877	0.0750663	na	10.4608	1.07651	0.554668	1.94082	0.0522805	na	10.4608	1.12593	0.553144	2.03552	0.0417987	na	10.4608	2.20244	0.973195
NITMOv2_RS20600	NZ_CP011801	4222151	4222546	-	396	30S ribosome-binding factor RbfA	880.45	969.034	704.509	427.523	743.523	166.636	670.97	755.698	430.82	NITMOv2_4481	-	30s ribosome binding factor (modular protein)	638.796	252.058	6.54372	2.58204	2.71011	267	13.4542	-0.7906	0.499309	-0.531668	0.487251	0.258932	0.531741	2.78614	0.248312	na	13.4542	-0.7906	0.499309	-1.58339	0.113333	na	13.4542	-0.531668	0.487251	-1.09116	0.275203	na	13.4542	-1.32227	0.831082
NITMOv2_RS01620	NZ_CP011801	343771	344049	+	279	integration host factor subunit beta	818.75	1375.4	666.632	242.723	633.194	236.515	1349.16	247.524	152.872	NITMOv2_0361	ihfB	integration host factor (IHF), DNA-binding protein, beta subunit	635.863	472.789	6.51368	4.84317	2.70347	268	9.40251	-1.22604	0.68068	-0.747759	0.653599	0.478281	0.720545	3.50408	0.17342	na	9.40251	-1.22604	0.68068	-1.8012	0.0716716	na	9.40251	-0.747759	0.653599	-1.14406	0.252597	na	9.40251	-1.9738	1.12332
NITMOv2_RS11455	NZ_CP011801	2309027	2310733	-	1707	hypothetical protein	471.893	650.744	612.885	664.502	609.454	592.743	570.737	849.586	699.61	NITMOv2_2480	-	conserved exported protein of unknown function	635.795	103.075	6.51298	1.05588	2.70332	269	57.8836	0.232015	0.253825	0.222179	0.254147	-0.00983587	0.259057	1.07806	0.583313	0.906946	57.8836	0.232015	0.253825	0.914075	0.360677	0.890601	57.8836	0.222179	0.254147	0.874215	0.382001	0.746465	57.8836	0.454194	0.43695
NITMOv2_RS00525	NZ_CP011801	121121	121597	-	477	50S ribosomal protein L9	504.096	635.117	560.505	745.343	905.321	922.26	510.613	434.334	491.785	NITMOv2_0126	rplI	50S ribosomal protein L9	634.375	182.585	6.49844	1.87037	2.70009	270	16.3806	0.712404	0.404928	-0.300821	0.445024	-1.01323	0.440933	6.03035	0.0490372	na	16.3806	0.712404	0.404928	1.75933	0.0785208	na	16.3806	-0.300821	0.445024	-0.675965	0.499063	na	16.3806	0.411583	0.72774
NITMOv2_RS01615	NZ_CP011801	342820	343722	+	903	signal peptide peptidase SppA	758.908	603.889	708.019	581.205	565.176	682.044	735.615	458.865	590.41	NITMOv2_0360	-	putative Peptidase S49, signal peptide peptidase SppA	631.57	96.6079	6.4697	0.989636	2.6937	271	30.5742	-0.090449	0.321641	-0.297558	0.327747	-0.207109	0.340955	0.853289	0.652695	0.920639	30.5742	-0.090449	0.321641	-0.281212	0.778548	0.980274	30.5742	-0.297558	0.327747	-0.907888	0.363937	0.72977	30.5742	-0.388007	0.552712
NITMOv2_RS17110	NZ_CP011801	3518431	3518871	-	441	DUF5069 domain-containing protein	736.084	915.951	658.979	767.797	445.102	798.038	451.878	521.989	386.859	NITMOv2_3723	-	conserved protein of unknown function	631.409	186.335	6.46805	1.90879	2.69333	272	14.9771	-0.0727425	0.431358	-0.825626	0.46658	-0.752883	0.483452	3.59029	0.166103	na	14.9771	-0.0727425	0.431358	-0.168636	0.866083	na	14.9771	-0.825626	0.46658	-1.76953	0.0768058	na	14.9771	-0.898368	0.757501
NITMOv2_RS10555	NZ_CP011801	2135748	2136326	+	579	hypothetical protein	539.879	627.877	381.457	614.039	542.425	417.884	956.046	636.124	957.626	NITMOv2_2289	-	conserved exported protein of unknown function	630.373	205.091	6.45744	2.10092	2.69096	273	19.4248	0.172079	0.416815	0.674563	0.401342	0.502484	0.413975	3.06267	0.216247	na	19.4248	0.172079	0.416815	0.412843	0.679722	na	19.4248	0.674563	0.401342	1.68077	0.0928079	na	19.4248	0.846642	0.705864
NITMOv2_RS03040	NZ_CP011801	625854	626804	+	951	[acyl-carrier-protein] S-malonyltransferase	417.191	594.646	635.613	747.694	681.133	485.714	675.204	822.998	605.459	NITMOv2_0658	fabD	Malonyl CoA-acyl carrier protein transacylase (MCT)	629.517	124.371	6.44867	1.27404	2.689	274	32.0175	0.352265	0.326647	0.28233	0.328523	-0.0699356	0.332895	1.30708	0.5202	0.890786	32.0175	0.352265	0.326647	1.07843	0.280842	0.831599	32.0175	0.28233	0.328523	0.85939	0.390126	0.746465	32.0175	0.634595	0.564298
NITMOv2_RS00540	NZ_CP011801	123616	124536	-	921	MerR family DNA-binding transcriptional regulator	535.212	657.873	820.397	661.756	703.32	549.301	649.115	574.868	509.406	NITMOv2_0130	-	Putative Regulatory protein, MerR family, Cobalamin B12-binding (fragment)	629.028	98.0105	6.44366	1.004	2.68788	275	31.0774	0.0426491	0.319562	-0.292637	0.329019	-0.335287	0.339183	1.15633	0.560927	0.89776	31.0774	0.0426491	0.319562	0.133461	0.893828	0.980274	31.0774	-0.292637	0.329019	-0.889424	0.373775	0.740121	31.0774	-0.249988	0.552902
NITMOv2_RS14565	NZ_CP011801	2984128	2984694	-	567	hypothetical protein	678.53	783.647	574.044	388.164	830.858	465.522	741.972	649.587	526.558	NITMOv2_3177	-	conserved exported protein of unknown function	626.542	149.369	6.4182	1.53011	2.68217	276	18.9309	-0.15863	0.408875	-0.148825	0.408854	0.00980438	0.428628	0.195545	0.906855	na	18.9309	-0.15863	0.408875	-0.387966	0.698041	na	18.9309	-0.148825	0.408854	-0.364006	0.715854	na	18.9309	-0.307455	0.69639
NITMOv2_RS00730	NZ_CP011801	167835	168206	-	372	response regulator	937.253	325.753	781.209	637.148	791.492	768.674	357.129	556.929	458.615	NITMOv2_0172	-	Signal transduction response regulator, receiver domain	623.8	213.313	6.39011	2.18515	2.67584	277	12.5505	0.151408	0.483025	-0.708051	0.5237	-0.859459	0.535116	2.8809	0.236821	na	12.5505	0.151408	0.483025	0.313458	0.753933	na	12.5505	-0.708051	0.5237	-1.35202	0.17637	na	12.5505	-0.556642	0.853698
NITMOv2_RS05725	NZ_CP011801	1159673	1160056	+	384	30S ribosomal protein S11	469.637	736.339	665.981	440.884	817.875	687.372	518.954	659.419	610.89	NITMOv2_1231	rpsK	30S ribosomal protein S11	623.039	125.399	6.38231	1.28456	2.67408	278	12.7703	0.168213	0.470548	-0.120877	0.483698	-0.28909	0.496914	0.345621	0.841297	na	12.7703	0.168213	0.470548	0.357483	0.720731	na	12.7703	-0.120877	0.483698	-0.249902	0.802663	na	12.7703	0.0473357	0.81476
NITMOv2_RS04040	NZ_CP011801	825459	825929	+	471	bacterioferritin	561.57	728.969	666.366	790.782	708.478	653.806	517.117	390.993	588.605	NITMOv2_0877	bfrA	Bacterioferritin	622.965	122.225	6.38155	1.25205	2.67391	279	15.8506	0.268341	0.415688	-0.441465	0.44534	-0.709806	0.453349	2.48658	0.288434	na	15.8506	0.268341	0.415688	0.645534	0.518581	na	15.8506	-0.441465	0.44534	-0.991299	0.321539	na	15.8506	-0.173124	0.732614
NITMOv2_RS21055	NZ_CP011801	4325181	4325459	+	279	30S ribosomal protein S20	387.829	941.066	291.651	970.892	633.194	709.545	317.448	495.048	840.794	NITMOv2_4579	rpsT	30S ribosomal protein S20	620.83	262.681	6.35968	2.69086	2.66895	280	9.3608	0.723454	0.583258	0.0488873	0.61454	-0.674567	0.608449	1.91881	0.383121	na	9.3608	0.723454	0.583258	1.24037	0.214839	na	9.3608	0.0488873	0.61454	0.079551	0.936594	na	9.3608	0.772341	1.03222
NITMOv2_RS03055	NZ_CP011801	627960	629210	+	1251	beta-ketoacyl-[acyl-carrier-protein] synthase II	518.965	645.778	557.525	811.987	486.41	826.385	707.978	533.631	494.358	NITMOv2_0661	fabF	3-oxoacyl-[acyl-carrier-protein] synthase II	620.335	133.726	6.35462	1.36986	2.6678	281	41.7363	0.424877	0.294135	-0.0509989	0.304249	-0.475876	0.306369	3.06568	0.215921	0.699872	41.7363	0.424877	0.294135	1.4445	0.148599	0.677738	41.7363	-0.0509989	0.304249	-0.167622	0.866881	0.959791	41.7363	0.373878	0.514104
NITMOv2_RS16885	NZ_CP011801	3474406	3474924	-	519	molybdopterin-guanine dinucleotide biosynthesis protein B	694.954	739.379	537.544	652.406	567.312	678.101	383.966	532.248	780.706	NITMOv2_3675	mobB	Molybdopterin-guanine dinucleotide biosynthesis protein B	618.513	124.041	6.33595	1.27066	2.66356	282	17.2318	0.06455	0.414149	-0.273883	0.427407	-0.338433	0.441028	0.65996	0.718938	na	17.2318	0.06455	0.414149	0.155862	0.876142	na	17.2318	-0.273883	0.427407	-0.640802	0.521651	na	17.2318	-0.209333	0.716859
NITMOv2_RS16640	NZ_CP011801	3415097	3415363	-	267	twin-arginine translocase TatA/TatE family subunit	225.144	378.216	653.056	570.672	661.652	659.053	663.431	862.162	878.583	NITMOv2_3619	tatA	Sec-independent protein translocase protein TatA	616.885	208.705	6.31927	2.13794	2.65976	283	8.75829	0.680891	0.592699	0.848659	0.585619	0.167768	0.579905	2.32923	0.312042	na	8.75829	0.680891	0.592699	1.1488	0.25064	na	8.75829	0.848659	0.585619	1.44917	0.147291	na	8.75829	1.52955	1.02576
NITMOv2_RS21215	NZ_CP011801	4355246	4355476	-	231	hypothetical protein	728.648	786.885	654.187	659.608	509.844	1333.09	287.559	398.61	184.637	NITMOv2_4613	-	conserved protein of unknown function	615.896	337.627	6.30914	3.4586	2.65744	284	7.69038	0.291581	0.582391	-1.39676	0.706453	-1.68834	0.714861	6.26307	0.0436508	na	7.69038	0.291581	0.582391	0.500661	0.61661	na	7.69038	-1.39676	0.706453	-1.97715	0.0480249	na	7.69038	-1.10518	1.07958
NITMOv2_RS04510	NZ_CP011801	913009	913359	-	351	preprotein translocase subunit SecG	548.043	402.784	364.297	723.501	447.385	751.997	441.579	721.416	1093.62	NITMOv2_0981	secG	Protein-export membrane protein SecG	610.514	234.868	6.254	2.40595	2.64478	285	11.4679	0.644521	0.5282	0.697487	0.526503	0.0529659	0.523194	2.15211	0.340938	na	11.4679	0.644521	0.5282	1.22022	0.222381	na	11.4679	0.697487	0.526503	1.32475	0.185253	na	11.4679	1.34201	0.91579
NITMOv2_RS01650	NZ_CP011801	347373	348299	+	927	D-alanyl-D-alanine carboxypeptidase	661.443	718.977	614.45	584.42	592.894	522.017	358.285	769.808	667.144	NITMOv2_0368	-	putative D-alanyl-D-alanine carboxypeptidase	609.938	120.101	6.2481	1.2303	2.64342	286	30.1979	-0.110656	0.330779	-0.225016	0.334205	-0.114361	0.347993	0.456983	0.795733	0.937301	30.1979	-0.110656	0.330779	-0.33453	0.737979	0.978398	30.1979	-0.225016	0.334205	-0.673288	0.500764	0.794002	30.1979	-0.335672	0.566671
NITMOv2_RS16305	NZ_CP011801	3353232	3353921	-	690	proteasome subunit alpha	679.544	673.224	707.572	343.506	483.613	350.659	609.708	834.048	803.573	NITMOv2_3550	prcA	Proteasome subunit alpha	609.494	180.371	6.24356	1.84769	2.64237	287	22.2092	-0.702211	0.382583	0.0461722	0.355635	0.748383	0.394145	4.4673	0.107137	0.633815	22.2092	-0.702211	0.382583	-1.83545	0.0664394	0.586672	22.2092	0.0461722	0.355635	0.12983	0.896701	na	22.2092	-0.656039	0.624773
NITMOv2_RS02745	NZ_CP011801	567783	569462	-	1680	phosphoenolpyruvate mutase	529.571	661.202	581.22	493.79	677.668	680.826	553.55	712.515	533.14	NITMOv2_0598	pepM	Phosphoenolpyruvate mutase	602.609	80.7238	6.17303	0.826922	2.62598	288	54.028	0.171834	0.252611	-0.0465044	0.256987	-0.218339	0.262837	0.785981	0.675035	0.926213	54.028	0.171834	0.252611	0.680233	0.496357	0.925151	54.028	-0.0465044	0.256987	-0.18096	0.856399	0.952929	54.028	0.12533	0.436607
NITMOv2_RS03315	NZ_CP011801	681009	681950	+	942	4-hydroxy-3-methylbut-2-enyl diphosphate reductase	663.673	514.566	617.006	485.253	520.94	560.405	423.096	1026.36	611.243	NITMOv2_0716	ispH	1-hydroxy-2-methyl-2-(E)-butenyl 4-diphosphate reductase, 4Fe-4S protein	602.504	175.276	6.17196	1.7955	2.62573	289	30.1169	-0.107858	0.345858	0.0970328	0.340786	0.204891	0.355261	0.3337	0.846327	0.951857	30.1169	-0.107858	0.345858	-0.311856	0.75515	0.980274	30.1169	0.0970328	0.340786	0.284733	0.775849	0.932653	30.1169	-0.010825	0.587618
NITMOv2_RS14570	NZ_CP011801	2984777	2985487	-	711	hypothetical protein	558.016	568.121	637.625	547.663	938.659	340.302	591.7	518.025	719.851	NITMOv2_3178	-	conserved exported protein of unknown function	602.218	162.086	6.16902	1.66038	2.62504	290	22.9975	0.167235	0.388572	-0.0196998	0.394292	-0.186935	0.403368	0.267803	0.874676	0.963173	22.9975	0.167235	0.388572	0.430385	0.666916	0.953323	22.9975	-0.0196998	0.394292	-0.0499623	0.960152	na	22.9975	0.147536	0.670971
NITMOv2_RS05530	NZ_CP011801	1130025	1130174	+	150	50S ribosomal protein L33	240.454	269.29	619.968	677.197	785.16	439.918	590.454	1227.72	568.683	NITMOv2_1192	rpmG	50S ribosomal protein L33	602.094	295.799	6.16775	3.03011	2.62474	291	4.80446	0.836935	0.795724	0.949768	0.789612	0.112832	0.77123	1.70344	0.426681	na	4.80446	0.836935	0.795724	1.05179	0.292895	na	4.80446	0.949768	0.789612	1.20283	0.229043	na	4.80446	1.7867	1.38511
NITMOv2_RS06485	NZ_CP011801	1324051	1324836	-	786	isoprenyl transferase	550.658	565.302	547.204	344.63	549.413	587.677	845.115	468.595	949.613	NITMOv2_1411	ispU	undecaprenyl pyrophosphate synthase	600.912	185.041	6.15564	1.89553	2.62191	292	25.0782	-0.0782131	0.375811	0.382554	0.363027	0.460767	0.379837	1.76363	0.414031	0.867735	25.0782	-0.0782131	0.375811	-0.208118	0.835137	0.980274	25.0782	0.382554	0.363027	1.05379	0.291979	0.665118	25.0782	0.304341	0.633851
NITMOv2_RS16160	NZ_CP011801	3321582	3322343	-	762	glycosyltransferase family 2 protein	252.445	795.146	579.694	22.2178	103.039	461.856	1917.81	815.66	447.782	NITMOv2_3520	waaE	Lipopolysaccharide core biosynthesis glycosyltransferase WaaE	599.517	566.291	6.14136	5.80099	2.61856	293	23.5541	-1.41405	0.979126	0.918502	0.939454	2.33255	0.976209	5.37063	0.0681998	0.523238	23.5541	-1.41405	0.979126	-1.4442	0.148684	0.677738	23.5541	0.918502	0.939454	0.977697	0.328224	na	23.5541	-0.495547	1.65213
NITMOv2_RS01810	NZ_CP011801	374715	376124	+	1410	argininosuccinate lyase	605.398	744.843	667.784	408.239	654.3	639.597	690.957	473.455	468.861	NITMOv2_0402	argH	Argininosuccinate lyase	594.826	116.262	6.0933	1.19097	2.60722	294	44.786	-0.144289	0.281711	-0.368587	0.286957	-0.224298	0.298066	1.65771	0.436548	0.867735	44.786	-0.144289	0.281711	-0.51219	0.608518	0.933726	44.786	-0.368587	0.286957	-1.28447	0.198979	0.606291	44.786	-0.512876	0.484321
NITMOv2_RS01330	NZ_CP011801	289345	290787	+	1443	F0F1 ATP synthase subunit beta	474.909	489.872	523.621	645.285	462.499	731.673	690.5	670.013	665.039	NITMOv2_0299	atpD	ATP synthase F1, beta subunit	594.823	105.466	6.09328	1.08038	2.60722	295	45.8556	0.408368	0.274335	0.367982	0.275298	-0.0403858	0.277997	2.69272	0.260186	0.756317	45.8556	0.408368	0.274335	1.48857	0.1366	0.677738	45.8556	0.367982	0.275298	1.33667	0.181331	0.599556	45.8556	0.77635	0.474147
NITMOv2_RS01520	NZ_CP011801	323326	324252	+	927	hypothetical protein	311.267	544.68	489.052	493.105	868.166	545.745	549.37	744.975	805.174	NITMOv2_0339	-	conserved protein of unknown function	594.615	176.931	6.09114	1.81245	2.60671	296	29.4092	0.632468	0.351332	0.592862	0.352441	-0.0396056	0.350726	3.99977	0.135351	0.668225	29.4092	0.632468	0.351332	1.8002	0.0718291	0.587395	29.4092	0.592862	0.352441	1.68216	0.0925379	0.494821	29.4092	1.22533	0.610155
NITMOv2_RS19260	NZ_CP011801	3958662	3958883	+	222	hypothetical protein	108.313	181.952	418.897	610.087	353.676	792.645	498.694	933.232	1440.92	NITMOv2_4189	-	conserved protein of unknown function	593.157	414.614	6.07621	4.24724	2.60317	297	6.96898	1.3705	0.742779	1.91303	0.720779	0.542534	0.665302	7.38175	0.0249501	na	6.96898	1.3705	0.742779	1.84509	0.0650242	na	6.96898	1.91303	0.720779	2.65411	0.0079517	na	6.96898	3.28353	1.30379
NITMOv2_RS05680	NZ_CP011801	1154404	1154769	+	366	50S ribosomal protein L18	525.582	386.276	381.128	508.823	697.205	540.883	483.979	817.641	990.533	NITMOv2_1222	rplR	50S ribosomal subunit protein L18	592.45	204.086	6.06896	2.09063	2.60145	298	11.5566	0.52422	0.516684	0.737364	0.508561	0.213144	0.510249	2.21307	0.330704	na	11.5566	0.52422	0.516684	1.01459	0.310303	na	11.5566	0.737364	0.508561	1.4499	0.147086	na	11.5566	1.26158	0.889291
NITMOv2_RS05455	NZ_CP011801	1116520	1117143	+	624	hypothetical protein	500.946	453.131	447.092	596.888	692.048	352.499	816.132	922.265	546.81	NITMOv2_1176	-	conserved exported protein of unknown function	591.979	186.186	6.06414	1.90725	2.6003	299	19.6675	0.350092	0.409639	0.617919	0.401774	0.267827	0.408278	2.37705	0.30467	na	19.6675	0.350092	0.409639	0.854635	0.392753	na	19.6675	0.617919	0.401774	1.53798	0.124055	na	19.6675	0.968011	0.701258
NITMOv2_RS05685	NZ_CP011801	1154872	1155381	+	510	30S ribosomal protein S5	518.626	435.615	774.96	398.351	346.394	646.938	738.067	902.734	543.594	NITMOv2_1223	rpsE	30S ribosomal subunit protein S5	589.476	188.524	6.03849	1.93121	2.59419	300	15.8742	-0.251298	0.452733	0.229071	0.434634	0.480369	0.462192	1.08331	0.581786	na	15.8742	-0.251298	0.452733	-0.555069	0.578848	na	15.8742	0.229071	0.434634	0.527043	0.598164	na	15.8742	-0.0222272	0.757712
NITMOv2_RS00105	NZ_CP011801	21656	22783	+	1128	efflux RND transporter periplasmic adaptor subunit	628.847	555.052	577.098	420.246	609.056	721.497	745.919	469.374	567.17	NITMOv2_0021	-	putative RND efflux system, membrane fusion protein	588.251	105.311	6.02595	1.07879	2.59119	301	35.4565	0.0724826	0.310311	-0.0594499	0.313718	-0.131933	0.322948	0.167619	0.919606	0.980355	35.4565	0.0724826	0.310311	0.23358	0.815311	0.980274	35.4565	-0.0594499	0.313718	-0.189501	0.8497	0.951825	35.4565	0.0130327	0.533974
NITMOv2_RS17710	NZ_CP011801	3635548	3636078	-	531	carboxypeptidase regulatory-like domain-containing protein	430.191	532.493	503.505	542.013	702.356	745.624	708.878	606.923	522.096	NITMOv2_3860	-	conserved exported protein of unknown function	588.231	108.671	6.02574	1.1132	2.59114	302	16.7177	0.546786	0.412833	0.260068	0.423316	-0.286717	0.423821	1.76157	0.414457	na	16.7177	0.546786	0.412833	1.32447	0.185346	na	16.7177	0.260068	0.423316	0.614359	0.538978	na	16.7177	0.806854	0.720854
NITMOv2_RS05275	NZ_CP011801	1072375	1072758	-	384	hypothetical protein	563.564	894.125	605.437	352.707	511.172	687.372	403.631	719.366	555.354	NITMOv2_1138	-	conserved protein of unknown function	588.081	165.102	6.02421	1.69128	2.59077	303	11.9765	-0.299418	0.49305	-0.347183	0.495874	-0.0477647	0.526078	0.604324	0.739218	na	11.9765	-0.299418	0.49305	-0.607278	0.543666	na	11.9765	-0.347183	0.495874	-0.700144	0.483838	na	11.9765	-0.646602	0.83739
NITMOv2_RS03805	NZ_CP011801	778823	779521	+	699	ATP phosphoribosyltransferase	515.996	751.237	631.941	532.845	308.897	849.627	443.474	559.85	671.192	NITMOv2_0824	hisG	ATP phosphoribosyltransferase	585.007	162.662	5.99271	1.66628	2.58321	304	21.7924	-0.0603038	0.391838	-0.235365	0.397801	-0.175062	0.412583	0.366158	0.832702	0.951191	21.7924	-0.0603038	0.391838	-0.1539	0.877689	0.980274	21.7924	-0.235365	0.397801	-0.591666	0.554075	na	21.7924	-0.295669	0.673307
NITMOv2_RS00835	NZ_CP011801	189836	191092	-	1257	ATP-dependent Clp protease ATP-binding subunit ClpX	621.699	610.561	462.386	606.083	484.089	402.471	563.679	714.216	780.412	NITMOv2_0193	clpX	ATP-dependent Clp protease ATP-binding subunit	582.844	120.558	5.97056	1.23498	2.57787	305	39.0676	-0.0507883	0.306526	0.212116	0.300885	0.262904	0.312717	0.818187	0.664252	0.925208	39.0676	-0.0507883	0.306526	-0.16569	0.868401	0.980274	39.0676	0.212116	0.300885	0.704972	0.480828	0.792845	39.0676	0.161327	0.520757
NITMOv2_RS05650	NZ_CP011801	1151742	1152110	+	369	50S ribosomal protein L14	488.728	547.336	913.57	458.806	319.171	536.486	600.055	686.225	693.515	NITMOv2_1216	rplN	50S ribosomal protein L14	582.655	169.48	5.96862	1.73613	2.5774	306	11.3936	-0.479957	0.517986	-0.0674965	0.497982	0.412461	0.539173	0.962363	0.618053	na	11.3936	-0.479957	0.517986	-0.926582	0.354143	na	11.3936	-0.0674965	0.497982	-0.13554	0.892185	na	11.3936	-0.547454	0.861327
NITMOv2_RS06650	NZ_CP011801	1353677	1355356	+	1680	DNA repair protein RecN	522.415	589.071	615.816	433.326	537.461	772.475	514.011	548.089	698.159	NITMOv2_1446	recN	DNA repair protein RecN	581.203	102.696	5.95375	1.05201	2.5738	307	52.0853	0.101665	0.267824	-0.0412765	0.270705	-0.142941	0.277542	0.284647	0.86734	0.961241	52.0853	0.101665	0.267824	0.379596	0.704245	0.955324	52.0853	-0.0412765	0.270705	-0.152478	0.87881	0.959791	52.0853	0.0603885	0.461511
NITMOv2_RS05620	NZ_CP011801	1149307	1149594	+	288	30S ribosomal protein S19	375.709	490.892	484.35	470.276	545.25	763.747	691.938	799.296	592.378	NITMOv2_1210	rpsS	30S ribosomal protein S19	579.315	144.31	5.93441	1.47829	2.5691	308	8.86293	0.496138	0.565298	0.556275	0.562853	0.0601368	0.566165	1.18085	0.55409	na	8.86293	0.496138	0.565298	0.877657	0.38013	na	8.86293	0.556275	0.562853	0.988314	0.322999	na	8.86293	1.05241	0.975801
NITMOv2_RS17945	NZ_CP011801	3697026	3698210	-	1185	efflux RND transporter periplasmic adaptor subunit	456.558	988.531	735.721	528.614	629.454	835.288	411.075	291.389	323.933	NITMOv2_3909	-	putative Cation efflux system protein CzcB	577.84	238.223	5.9193	2.44032	2.56543	309	36.8176	-0.00637021	0.315888	-1.12724	0.346869	-1.12087	0.354724	12.8799	0.00159649	0.0393241	36.8176	-0.00637021	0.315888	-0.020166	0.983911	0.993309	36.8176	-1.12724	0.346869	-3.24976	0.00115501	0.0555851	36.8176	-1.13361	0.560693
NITMOv2_RS18180	NZ_CP011801	3734185	3734709	-	525	ubiquinol-cytochrome c reductase iron-sulfur subunit	412.207	1000.22	575.684	225.732	523.44	712.248	674.804	789.248	284.341	NITMOv2_3961	-	putative Quinol-cytochrome c reductase, iron-sulfur subunit (Rieske iron-sulfur protein)	577.547	247.761	5.9163	2.53802	2.5647	310	15.9746	-0.330851	0.486844	-0.227163	0.483298	0.103689	0.508229	0.495336	0.780619	na	15.9746	-0.330851	0.486844	-0.679584	0.496768	na	15.9746	-0.227163	0.483298	-0.470026	0.638336	na	15.9746	-0.558014	0.826373
NITMOv2_RS09590	NZ_CP011801	1942478	1942843	-	366	DNA-directed RNA polymerase subunit omega	821.223	441.458	444.649	647.593	536.312	600.981	544.476	691.85	466.133	NITMOv2_2078	rpoZ	DNA-directed RNA polymerase subunit omega	577.186	127.125	5.9126	1.30225	2.56379	311	11.3448	0.148833	0.505416	-0.114533	0.517919	-0.263366	0.532383	0.24897	0.882952	na	11.3448	0.148833	0.505416	0.294476	0.768395	na	11.3448	-0.114533	0.517919	-0.221141	0.824982	na	11.3448	0.0342994	0.874036
NITMOv2_RS00125	NZ_CP011801	27506	30760	+	3255	multidrug efflux RND transporter permease subunit	590.978	626.688	642.824	494.115	572.89	554.121	591.814	530.408	576.545	NITMOv2_0025	-	Multidrug efflux system protein	575.598	45.7985	5.89633	0.469153	2.55982	312	100.134	-0.093287	0.197966	-0.203095	0.199617	-0.109808	0.206402	1.04002	0.594513	0.909564	100.134	-0.093287	0.197966	-0.471227	0.637478	0.946489	100.134	-0.203095	0.199617	-1.01742	0.308954	0.680819	100.134	-0.296382	0.339814
NITMOv2_RS03215	NZ_CP011801	657862	659445	+	1584	FAD-binding protein	554.076	561.02	572.413	673.349	359.37	555.452	726.884	624.904	538.525	NITMOv2_0695	sdhA or nadB	Succinate dehydrogenase/fumarate reductase, flavoprotein subunit	573.999	102.513	5.87996	1.05013	2.55581	313	48.5759	0.0317077	0.28342	0.0872107	0.282524	0.055503	0.29091	0.0968198	0.952743	0.992864	48.5759	0.0317077	0.28342	0.111875	0.910922	0.980274	48.5759	0.0872107	0.282524	0.308685	0.757562	0.924555	48.5759	0.118918	0.485453
NITMOv2_RS11055	NZ_CP011801	2226870	2227799	+	930	cysteine synthase A	478.322	564.639	624.967	400.493	696.513	804.152	476.172	643.562	458.615	NITMOv2_2397	cysK	cysteine synthase A, O-acetylserine sulfhydrolase A subunit	571.937	131.153	5.85883	1.34351	2.55061	314	28.4082	0.273077	0.336469	-0.1588	0.348588	-0.431877	0.354462	1.54843	0.461064	0.874976	28.4082	0.273077	0.336469	0.811596	0.417023	0.916498	28.4082	-0.1588	0.348588	-0.455552	0.648712	0.869711	28.4082	0.114277	0.586351
NITMOv2_RS05565	NZ_CP011801	1133711	1137667	+	3957	DNA-directed RNA polymerase subunit beta	513.479	571.653	505.281	654.607	615.112	478.051	576.353	663.192	565.88	NITMOv2_1199	rpoB	RNA polymerase, beta subunit	571.512	64.9571	5.85448	0.66541	2.54954	315	121.175	0.261747	0.200797	0.111278	0.202467	-0.150469	0.205017	1.71147	0.424971	0.867735	121.175	0.261747	0.200797	1.30354	0.192392	0.7762	121.175	0.111278	0.202467	0.549608	0.582588	0.832844	121.175	0.373024	0.347265
NITMOv2_RS05670	NZ_CP011801	1153425	1153820	+	396	30S ribosomal protein S8	971.531	663.024	557.736	342.019	297.409	277.726	670.97	930.09	430.82	NITMOv2_1220	rpsH	30S ribosomal subunit protein S8	571.258	260.037	5.85188	2.66377	2.5489	316	11.9309	-1.14938	0.539795	-0.209539	0.488958	0.93984	0.561512	4.90944	0.0858871	na	11.9309	-1.14938	0.539795	-2.12929	0.0332304	na	11.9309	-0.209539	0.488958	-0.428541	0.668257	na	11.9309	-1.35892	0.863493
NITMOv2_RS03325	NZ_CP011801	686015	688192	+	2178	squalene--hopene cyclase	673.448	510.018	608.439	481.935	603.831	444.362	538.809	676.429	587.482	NITMOv2_0719	shc	Squalene--hopene cyclase	569.417	81.4434	5.83302	0.834293	2.54424	317	66.2117	-0.130454	0.244097	-0.0828624	0.243439	0.0475914	0.252592	0.304069	0.858959	0.954852	66.2117	-0.130454	0.244097	-0.534434	0.593041	0.93254	66.2117	-0.0828624	0.243439	-0.340382	0.733569	0.913993	66.2117	-0.213316	0.417001
NITMOv2_RS22880	NZ_CP011801	3090221	3090673	+	453	PIN domain-containing protein	796.205	624.181	436.235	523.221	216.656	485.561	879.815	406.529	753.222	NITMOv2_3283	-	conserved protein of unknown function	569.07	212.849	5.82946	2.18039	2.54336	318	13.7283	-0.485516	0.506016	0.0684591	0.483055	0.553975	0.519996	1.3313	0.513938	na	13.7283	-0.485516	0.506016	-0.959487	0.337313	na	13.7283	0.0684591	0.483055	0.141721	0.8873	na	13.7283	-0.417057	0.841661
NITMOv2_RS03010	NZ_CP011801	621976	622386	+	411	single-stranded DNA-binding protein	380.28	442.264	537.381	617.881	620.869	588.698	592.609	448.073	882.081	NITMOv2_0652	ssb	Single-stranded DNA-binding protein	567.793	146.344	5.81638	1.49912	2.54012	319	12.5219	0.534239	0.486165	0.432716	0.490541	-0.101524	0.49161	1.36076	0.506424	na	12.5219	0.534239	0.486165	1.09888	0.271818	na	12.5219	0.432716	0.490541	0.882119	0.377712	na	12.5219	0.966955	0.843974
NITMOv2_RS16680	NZ_CP011801	3423491	3424591	+	1101	WD40 repeat domain-containing protein	753.466	568.663	401.205	430.552	588.335	519.431	744.101	397.252	697.295	NITMOv2_3628	-	conserved protein of unknown function	566.7	141.753	5.80518	1.45209	2.53734	320	33.3771	-0.0675027	0.346562	0.0234546	0.344643	0.0909574	0.356526	0.0702654	0.965477	0.992864	33.3771	-0.0675027	0.346562	-0.194778	0.845566	0.980274	33.3771	0.0234546	0.344643	0.0680549	0.945742	0.986747	33.3771	-0.0440481	0.592163
NITMOv2_RS15035	NZ_CP011801	3089956	3090240	+	285	type II toxin-antitoxin system prevent-host-death family antitoxin	295.294	425.194	489.448	297.016	619.864	385.893	1398.44	807.71	374.133	NITMOv2_3282	-	conserved protein of unknown function	565.888	352.643	5.79687	3.61242	2.53527	321	8.48692	0.211105	0.64457	1.02037	0.607368	0.809268	0.62651	3.21944	0.199944	na	8.48692	0.211105	0.64457	0.327513	0.74328	na	8.48692	1.02037	0.607368	1.67999	0.0929587	na	8.48692	1.23148	1.08454
NITMOv2_RS04465	NZ_CP011801	905851	907248	-	1398	tetratricopeptide repeat protein	515.996	491.193	440.696	581.285	449.305	472.015	760.241	724.512	655.938	NITMOv2_0971	-	conserved protein of unknown function	565.687	121.154	5.7948	1.24108	2.53476	322	42.098	0.173087	0.286752	0.488542	0.280322	0.315455	0.288158	3.1233	0.20979	0.699872	42.098	0.173087	0.286752	0.603613	0.546101	0.925151	42.098	0.488542	0.280322	1.74279	0.0813706	0.481964	42.098	0.661629	0.488445
NITMOv2_RS10620	NZ_CP011801	2148721	2149131	-	411	ACT domain-containing protein	731.308	491.404	424.248	659.073	525.351	374.626	484.862	672.109	726.419	NITMOv2_2302	-	conserved protein of unknown function	565.489	133.93	5.79278	1.37196	2.53425	323	12.458	0.0390728	0.494692	0.104101	0.492315	0.0650278	0.510933	0.0456145	0.977451	na	12.458	0.0390728	0.494692	0.0789841	0.937045	na	12.458	0.104101	0.492315	0.211451	0.832535	na	12.458	0.143173	0.844474
NITMOv2_RS03920	NZ_CP011801	799413	801188	+	1776	biosynthetic-type acetolactate synthase large subunit	656.645	488.997	530.167	524.294	475.252	557.329	536.096	712.886	588.375	NITMOv2_0853	ilvI	acetolactate synthase, large subunit	563.338	77.7708	5.77074	0.796671	2.52876	324	53.3757	-0.0128738	0.260504	0.0401531	0.259659	0.0530269	0.268618	0.0438142	0.978331	0.992864	53.3757	-0.0128738	0.260504	-0.0494186	0.960586	0.983707	53.3757	0.0401531	0.259659	0.154638	0.877107	0.959791	53.3757	0.0272794	0.445437
NITMOv2_RS03000	NZ_CP011801	621204	621494	+	291	hypothetical protein	578.412	485.832	878.82	407.249	741.99	529.111	836.984	237.317	366.419	NITMOv2_0650	-	protein of unknown function	562.459	218.848	5.76174	2.24185	2.5265	325	8.79147	-0.136704	0.582947	-0.521346	0.604925	-0.384642	0.630535	0.780267	0.676966	na	8.79147	-0.136704	0.582947	-0.234505	0.814593	na	8.79147	-0.521346	0.604925	-0.861836	0.388778	na	8.79147	-0.65805	1.00695
NITMOv2_RS05905	NZ_CP011801	1197766	1198608	+	843	hypothetical protein	385.069	1126.03	275.786	381.576	1140.95	652.31	210.126	655.366	227.675	NITMOv2_1273	-	ABC transporter, ATP-binding protein NrtD	561.655	362.552	5.7535	3.71393	2.52444	326	25.4064	0.415627	0.709731	-0.769512	0.729588	-1.18514	0.730792	2.59671	0.272981	0.761657	25.4064	0.415627	0.709731	0.585612	0.558137	0.925151	25.4064	-0.769512	0.729588	-1.05472	0.291553	0.665118	25.4064	-0.353886	1.24015
NITMOv2_RS06395	NZ_CP011801	1302864	1304606	-	1743	hypothetical protein	682.873	753.176	493.52	427.376	529.296	466.924	431.915	594.313	660.69	NITMOv2_1388	-	protein of unknown function	560.009	118.19	5.73665	1.21072	2.52021	327	52.0155	-0.321186	0.273879	-0.255571	0.272729	0.0656149	0.285932	1.59352	0.450787	0.869839	52.0155	-0.321186	0.273879	-1.17273	0.240904	0.817217	52.0155	-0.255571	0.272729	-0.937087	0.348714	0.7218	52.0155	-0.576756	0.465858
NITMOv2_RS03005	NZ_CP011801	621642	621989	+	348	30S ribosomal protein S6	483.672	406.256	367.438	389.194	789.673	568.86	509.012	727.635	796.646	NITMOv2_0651	rpsF	30S ribosomal protein S6	559.821	171.482	5.73471	1.75663	2.51972	328	10.3869	0.562556	0.535785	0.612905	0.534026	0.0503496	0.534101	1.61974	0.444916	na	10.3869	0.562556	0.535785	1.04997	0.293734	na	10.3869	0.612905	0.534026	1.14771	0.25109	na	10.3869	1.17546	0.92695
NITMOv2_RS02660	NZ_CP011801	552928	553182	+	255	hypothetical protein	188.591	633.622	364.687	730.311	615.812	258.775	694.652	631.914	919.928	NITMOv2_0580	-	conserved protein of unknown function	559.81	239.066	5.73461	2.44895	2.51969	329	7.62515	0.661774	0.655622	0.932273	0.643376	0.2705	0.63816	2.17178	0.337601	na	7.62515	0.661774	0.655622	1.00938	0.312791	na	7.62515	0.932273	0.643376	1.44903	0.147329	na	7.62515	1.59405	1.1315
NITMOv2_RS20535	NZ_CP011801	4207031	4208344	-	1314	homoserine dehydrogenase	640.479	645.557	628.106	541.139	448.151	518.929	438.122	578.121	584.263	NITMOv2_4468	hom	Homoserine dehydrogenase	558.096	78.0438	5.71705	0.799468	2.51527	330	39.1954	-0.231471	0.285266	-0.33321	0.288095	-0.101739	0.302512	1.46922	0.479693	0.887337	39.1954	-0.231471	0.285266	-0.811421	0.417124	0.916498	39.1954	-0.33321	0.288095	-1.1566	0.247437	0.639083	39.1954	-0.56468	0.48707
NITMOv2_RS02280	NZ_CP011801	465545	466321	-	777	class I SAM-dependent methyltransferase	464.197	493.871	598.424	413.988	555.776	452.94	683.923	859.166	494.029	NITMOv2_0500	ubiE	Ubiquinone/menaquinone biosynthesis methyltransferase ubiE	557.368	140.078	5.70959	1.43493	2.51339	331	22.9454	-0.030204	0.372733	0.299079	0.362843	0.329283	0.379335	0.962464	0.618022	0.917781	22.9454	-0.030204	0.372733	-0.0810339	0.935415	0.980864	22.9454	0.299079	0.362843	0.824267	0.409788	na	22.9454	0.268875	0.630297
NITMOv2_RS18680	NZ_CP011801	3839769	3841064	-	1296	NADH-quinone oxidoreductase subunit NuoF	630.821	529.852	448.472	496.402	393.792	458.248	529.632	674.961	839.202	NITMOv2_4064	nuoF	NADH-quinone oxidoreductase, subunit F	555.709	137.982	5.69259	1.41347	2.50909	332	38.3008	-0.144942	0.311185	0.269286	0.302002	0.414229	0.316266	1.80437	0.405683	0.867735	38.3008	-0.144942	0.311185	-0.465776	0.641376	0.946489	38.3008	0.269286	0.302002	0.891671	0.372569	0.740121	38.3008	0.124344	0.525412
NITMOv2_RS03925	NZ_CP011801	801288	801806	+	519	acetolactate synthase small subunit	347.477	817.208	649.533	424.064	567.312	550.957	639.943	487.894	493.077	NITMOv2_0854	ilvH	Acetolactate synthase, small subunit	553.052	138.558	5.66537	1.41936	2.50217	333	15.2809	-0.0971625	0.447872	-0.197018	0.4523	-0.0998555	0.472271	0.190441	0.909172	na	15.2809	-0.0971625	0.447872	-0.216943	0.828253	na	15.2809	-0.197018	0.4523	-0.435591	0.663133	na	15.2809	-0.294181	0.766348
NITMOv2_RS05925	NZ_CP011801	1201102	1202265	+	1164	ammonium transporter	351.178	798.152	679.088	349.071	590.219	850.357	513.604	454.857	384.74	NITMOv2_1278	amtB	Ammonium transporter Amt	552.363	189.61	5.65832	1.94233	2.50037	334	34.2832	0.0743493	0.347892	-0.481939	0.361273	-0.556288	0.368854	2.61876	0.269988	0.761657	34.2832	0.0743493	0.347892	0.213714	0.83077	0.980274	34.2832	-0.481939	0.361273	-1.334	0.182203	0.599556	34.2832	-0.40759	0.605838
NITMOv2_RS11740	NZ_CP011801	2378013	2378654	-	642	DNA-binding response regulator	786.532	692.099	615.622	474.671	366.897	342.615	413.87	573.7	697.566	NITMOv2_2539	-	Response regulator, LuxR family	551.508	159.493	5.64956	1.63382	2.49814	335	18.8636	-0.699829	0.409962	-0.388639	0.397719	0.31119	0.434268	3.05992	0.216545	na	18.8636	-0.699829	0.409962	-1.70706	0.0878113	na	18.8636	-0.388639	0.397719	-0.97717	0.328485	na	18.8636	-1.08847	0.681109
NITMOv2_RS00130	NZ_CP011801	30757	32193	+	1437	transporter	460.159	548.136	679.505	530.165	382.472	642.887	523.889	512.617	682.657	NITMOv2_0026	ttgC	RND efflux system, outer membrane factor lipoprotein	551.387	100.991	5.64832	1.03453	2.49782	336	42.2882	-0.0167594	0.295147	-0.0443318	0.295931	-0.0275724	0.305741	0.0232323	0.988451	0.994035	42.2882	-0.0167594	0.295147	-0.0567833	0.954718	0.983707	42.2882	-0.0443318	0.295931	-0.149805	0.880919	0.959791	42.2882	-0.0610912	0.505862
NITMOv2_RS09660	NZ_CP011801	1957591	1957941	+	351	arsenate reductase (glutaredoxin)	856.318	690.486	397.415	337.634	727	313.332	378.496	590.249	668.324	NITMOv2_2094	arsC	Arsenate reductase	551.028	198.215	5.64464	2.03048	2.49688	337	10.3285	-0.386436	0.555266	-0.319872	0.552336	0.0665636	0.587352	0.584062	0.746745	na	10.3285	-0.386436	0.555266	-0.695947	0.486462	na	10.3285	-0.319872	0.552336	-0.579125	0.562505	na	10.3285	-0.706308	0.939047
NITMOv2_RS20585	NZ_CP011801	4218633	4220750	-	2118	polyribonucleotide nucleotidyltransferase	488.174	591.216	647.629	583.515	491.189	706.195	470.439	445.613	533.643	NITMOv2_4478	pnp	polynucleotide phosphorylase/polyadenylase	550.846	87.6921	5.64278	0.898304	2.49641	338	62.6211	0.149664	0.241986	-0.320633	0.250577	-0.470297	0.255728	3.48692	0.174914	0.681664	62.6211	0.149664	0.241986	0.61848	0.536259	0.925151	62.6211	-0.320633	0.250577	-1.27958	0.200693	0.606291	62.6211	-0.170969	0.421064
NITMOv2_RS19155	NZ_CP011801	3936876	3937799	-	924	UDP-glucose 4-epimerase	442.394	327.869	389.996	567.995	658.549	404.687	431.338	1071.26	646.23	NITMOv2_4165	-	putative UDP-glucose 4-epimerase	548.925	227.704	5.6231	2.33256	2.49136	339	26.9848	0.593232	0.378738	0.783427	0.374572	0.190195	0.373687	4.67939	0.096357	0.62112	26.9848	0.593232	0.378738	1.56634	0.11727	0.672526	26.9848	0.783427	0.374572	2.09152	0.0364811	0.33441	26.9848	1.37666	0.654104
NITMOv2_RS14635	NZ_CP011801	2999789	3001999	-	2211	glycine--tRNA ligase subunit beta	696.022	548.079	615.131	367.543	337.36	606.852	660.956	593.453	511.197	NITMOv2_3193	glyS	Glycine--tRNA ligase beta subunit	548.51	123.992	5.61885	1.27015	2.49028	340	64.3935	-0.425412	0.258149	-0.160922	0.253672	0.26449	0.266955	2.74142	0.253926	0.756317	64.3935	-0.425412	0.258149	-1.64793	0.0993666	0.620048	64.3935	-0.160922	0.253672	-0.634371	0.525839	0.807864	64.3935	-0.586334	0.43671
NITMOv2_RS20605	NZ_CP011801	4222600	4222881	-	282	DUF503 domain-containing protein	511.604	572.956	535.876	300.176	278.426	1247.99	549.625	408.151	529.359	NITMOv2_4482	-	conserved protein of unknown function	548.241	284.183	5.61609	2.91113	2.48957	341	8.22864	0.224632	0.615835	-0.187952	0.63797	-0.412584	0.650987	0.406078	0.816246	na	8.22864	0.224632	0.615835	0.364761	0.71529	na	8.22864	-0.187952	0.63797	-0.294609	0.768293	na	8.22864	0.0366809	1.07179
NITMOv2_RS16375	NZ_CP011801	3365755	3366159	-	405	50S ribosomal protein L19	504.656	498.684	574.044	543.43	242.333	760.352	710.731	625.227	473.902	NITMOv2_3564	rplS	50S ribosomal subunit protein L19	548.151	150.612	5.61517	1.54284	2.48933	342	11.8155	0.0590845	0.505992	0.114023	0.503986	0.0549388	0.522512	0.0514897	0.974584	na	11.8155	0.0590845	0.505992	0.11677	0.907043	na	11.8155	0.114023	0.503986	0.226243	0.821012	na	11.8155	0.173108	0.864316
NITMOv2_RS18285	NZ_CP011801	3753768	3754421	-	654	hypothetical protein	827.25	617.637	746.521	336.528	510.234	639.025	473.988	422.38	358.687	NITMOv2_3982	-	conserved exported protein of unknown function	548.028	170.942	5.61391	1.7511	2.48901	343	19.1718	-0.494381	0.392322	-0.896638	0.409722	-0.402257	0.435511	5.09107	0.078431	na	19.1718	-0.494381	0.392322	-1.26014	0.207619	na	19.1718	-0.896638	0.409722	-2.18841	0.02864	na	19.1718	-1.39102	0.673727
NITMOv2_RS11520	NZ_CP011801	2320903	2323152	+	2250	trehalose-6-phosphate synthase	528.999	610.39	526.972	744.917	497.268	469.246	492.045	572.935	483.38	NITMOv2_2494	-	Alpha,alpha-trehalose-phosphate synthase (UDP-forming)	547.35	86.7269	5.60697	0.888416	2.48722	344	66.229	0.174438	0.251059	-0.175763	0.256805	-0.350201	0.261364	1.80148	0.40627	0.867735	66.229	0.174438	0.251059	0.694809	0.487175	0.925151	66.229	-0.175763	0.256805	-0.684422	0.493709	0.792845	66.229	-0.00132502	0.435486
NITMOv2_RS05675	NZ_CP011801	1153847	1154383	+	537	50S ribosomal protein L6	671.659	639.375	411.291	346.796	548.296	204.804	412.328	728.744	953.099	NITMOv2_1221	rplF	50S ribosomal protein L6	546.266	227.967	5.59586	2.33525	2.48436	345	15.5395	-0.515275	0.486255	0.218264	0.458018	0.73354	0.495086	2.27662	0.32036	na	15.5395	-0.515275	0.486255	-1.05968	0.289289	na	15.5395	0.218264	0.458018	0.476541	0.633689	na	15.5395	-0.297011	0.804574
NITMOv2_RS05605	NZ_CP011801	1147532	1148155	+	624	50S ribosomal protein L4	404.61	194.199	670.638	379.838	408.938	493.498	816.132	774.702	751.864	NITMOv2_1207	rplD	50S ribosomal protein L4	543.824	216.811	5.57085	2.22097	2.4779	346	17.9347	0.0548166	0.449088	0.751344	0.42713	0.696527	0.444276	3.86524	0.144769	na	17.9347	0.0548166	0.449088	0.122062	0.90285	na	17.9347	0.751344	0.42713	1.75905	0.0785687	na	17.9347	0.80616	0.755552
NITMOv2_RS01580	NZ_CP011801	335271	336347	+	1077	histidinol-phosphate transaminase	658.625	637.594	593.632	361.549	400.964	490.16	411.18	683.966	653.431	NITMOv2_0353	hisC	Histidinol-phosphate aminotransferase	543.455	127.58	5.56707	1.30691	2.47692	347	31.0469	-0.497243	0.326221	-0.189336	0.317467	0.307907	0.341131	2.34826	0.309088	0.793943	31.0469	-0.497243	0.326221	-1.52425	0.127446	0.677738	31.0469	-0.189336	0.317467	-0.596396	0.550911	0.830275	31.0469	-0.686579	0.545931
NITMOv2_RS07430	NZ_CP011801	1513923	1514243	-	321	hypothetical protein	786.532	1069.61	398.344	210.965	366.897	616.708	620.804	286.85	531.479	NITMOv2_1620	-	conserved protein of unknown function	543.132	268.338	5.56376	2.74881	2.47606	348	9.25153	-0.817714	0.598215	-0.676694	0.59026	0.14102	0.644095	2.30349	0.316085	na	9.25153	-0.817714	0.598215	-1.36692	0.171649	na	9.25153	-0.676694	0.59026	-1.14643	0.251615	na	9.25153	-1.49441	0.998839
NITMOv2_RS16265	NZ_CP011801	3343739	3346246	+	2508	endopeptidase La	541.693	467.069	486.667	499.527	579.165	491.137	573.856	642.496	586.709	NITMOv2_3542	lon	Lon protease	540.924	58.6851	5.54114	0.601161	2.47018	349	72.4615	0.17187	0.226743	0.185988	0.22666	0.0141178	0.231846	0.845356	0.655289	0.920639	72.4615	0.17187	0.226743	0.757995	0.448454	0.925151	72.4615	0.185988	0.22666	0.820559	0.411897	0.766005	72.4615	0.357857	0.389642
NITMOv2_RS16645	NZ_CP011801	3415389	3416201	-	813	tetratricopeptide repeat protein	665.463	670.74	571.926	583.073	507.022	432.884	435.759	481.347	498.384	NITMOv2_3620	-	conserved protein of unknown function	538.511	89.6437	5.51642	0.918295	2.46373	350	23.5012	-0.198765	0.352901	-0.501154	0.363755	-0.302389	0.381364	1.92126	0.382652	0.856027	23.5012	-0.198765	0.352901	-0.563231	0.573277	0.925151	23.5012	-0.501154	0.363755	-1.37772	0.168289	na	23.5012	-0.699919	0.606857
NITMOv2_RS10625	NZ_CP011801	2149275	2149637	-	363	hypothetical protein	695.528	500.745	480.347	419.75	378.521	424.164	670.97	507.322	763.727	NITMOv2_2303	-	protein of unknown function	537.897	137.603	5.51013	1.40958	2.46209	351	10.3892	-0.36037	0.536192	0.129916	0.511648	0.490286	0.551841	0.839724	0.657137	na	10.3892	-0.36037	0.536192	-0.672092	0.501525	na	10.3892	0.129916	0.511648	0.253916	0.79956	na	10.3892	-0.230455	0.891091
NITMOv2_RS11735	NZ_CP011801	2377285	2377938	+	654	DNA-binding response regulator	514.733	494.109	622.101	647.168	600.276	336.329	541.701	492.777	586.943	NITMOv2_2538	-	Response regulator, LuxR family	537.349	93.8471	5.50451	0.961355	2.46061	352	18.8903	0.081437	0.402033	-0.089926	0.408326	-0.171363	0.421264	0.16809	0.91939	na	18.8903	0.081437	0.402033	0.202563	0.839477	na	18.8903	-0.089926	0.408326	-0.220231	0.825692	na	18.8903	-0.00848898	0.692285
NITMOv2_RS20520	NZ_CP011801	4203513	4204733	-	1221	aspartate kinase	551.41	496.234	714.029	485.297	546.59	522.425	453.358	414.77	646.23	NITMOv2_4465	lysC	Aspartokinase	536.705	93.5768	5.49792	0.958586	2.45889	353	35.1276	-0.0885325	0.309107	-0.29947	0.314727	-0.210938	0.32663	0.943603	0.623877	0.917781	35.1276	-0.0885325	0.309107	-0.286414	0.774561	0.980274	35.1276	-0.29947	0.314727	-0.951524	0.341338	0.714213	35.1276	-0.388003	0.531519
NITMOv2_RS11525	NZ_CP011801	2323149	2323967	+	819	hypothetical protein	484.431	295.923	596.123	558.129	623.143	590.855	486.638	674.571	494.733	NITMOv2_2495	-	putative Trehalose-phosphatase	533.838	110.851	5.46855	1.13554	2.45116	354	23.4446	0.431812	0.367121	0.146452	0.3756	-0.28536	0.378693	1.43237	0.488613	0.890325	23.4446	0.431812	0.367121	1.17621	0.23951	0.817217	23.4446	0.146452	0.3756	0.389915	0.696599	na	23.4446	0.578265	0.638982
NITMOv2_RS17000	NZ_CP011801	3500303	3500998	-	696	hypothetical protein	380.028	696.438	501.051	413.518	394.836	663.67	604.452	760.709	367.683	NITMOv2_3700	tolQ	Protein TolQ	531.376	152.412	5.44333	1.56129	2.44449	355	19.5856	0.0235796	0.409878	0.0842867	0.408165	0.060707	0.422973	0.0492013	0.975699	na	19.5856	0.0235796	0.409878	0.0575284	0.954124	na	19.5856	0.0842867	0.408165	0.206502	0.836399	na	19.5856	0.107866	0.700208
NITMOv2_RS02825	NZ_CP011801	583354	584244	+	891	16S rRNA (cytosine(1402)-N(4))-methyltransferase RsmH	337.337	476.017	430.533	494.027	264.364	641.856	646.12	671.732	813.771	NITMOv2_0614	mraW	S-adenosyl-dependent methyltransferase activity on membrane-located substrates	530.64	176.206	5.43579	1.80503	2.44249	356	25.0492	0.286071	0.376303	0.722069	0.365055	0.435998	0.372657	3.99544	0.135644	0.668225	25.0492	0.286071	0.376303	0.760215	0.447126	0.925151	25.0492	0.722069	0.365055	1.97797	0.0479319	0.397546	25.0492	1.00814	0.640988
NITMOv2_RS16245	NZ_CP011801	3338837	3339376	-	540	OmpH family outer membrane protein	556.606	261.809	495.113	532.979	799.7	488.798	492.045	511.55	631.87	NITMOv2_3538	-	putative Outer membrane chaperone Skp	530.052	141.622	5.42977	1.45075	2.44089	357	15.4221	0.534467	0.44719	0.197186	0.459442	-0.337281	0.460212	1.46822	0.479933	na	15.4221	0.534467	0.44719	1.19517	0.232021	na	15.4221	0.197186	0.459442	0.429186	0.667788	na	15.4221	0.731653	0.78124
NITMOv2_RS06615	NZ_CP011801	1346096	1347160	+	1065	["GTP 3',8-cyclase MoaA"]	372.534	512.029	578.491	476.899	626.654	619.603	478.184	713.287	380.457	NITMOv2_1439	moaA	Cyclic pyranopterin monophosphate synthase 3	528.682	115.264	5.41573	1.18075	2.43716	358	30.0603	0.34092	0.331538	0.0238936	0.339893	-0.317027	0.344372	1.28938	0.524824	0.890786	30.0603	0.34092	0.331538	1.0283	0.303809	0.846326	30.0603	0.0238936	0.339893	0.0702974	0.943957	0.986747	30.0603	0.364814	0.576453
NITMOv2_RS06475	NZ_CP011801	1321983	1323143	-	1161	1-deoxy-D-xylulose-5-phosphate reductoisomerase	445.285	434.899	560.694	452.048	557.931	435.75	534.002	693.963	642.891	NITMOv2_1409	dxr	1-deoxy-D-xylulose 5-phosphate reductoisomerase	528.607	95.2163	5.41496	0.97538	2.43695	359	32.67	0.104386	0.315143	0.289461	0.310741	0.185075	0.320979	0.885611	0.642232	0.919158	32.67	0.104386	0.315143	0.331234	0.740468	0.978924	32.67	0.289461	0.310741	0.931519	0.351585	0.723852	32.67	0.393847	0.537329
NITMOv2_RS07695	NZ_CP011801	1570874	1571554	-	681	FKBP-type peptidyl-prolyl cis-trans isomerase	600.252	533.834	256.044	522.068	317.062	678.288	390.168	811.268	626.302	NITMOv2_1684	fkpA	FKBP-type peptidyl-prolyl cis-trans isomerase FkpA	526.143	178.606	5.38972	1.82961	2.43021	360	19.0595	0.235954	0.441839	0.323698	0.439465	0.0877439	0.448233	0.58288	0.747187	na	19.0595	0.235954	0.441839	0.534027	0.593323	na	19.0595	0.323698	0.439465	0.736573	0.461382	na	19.0595	0.559652	0.758808
NITMOv2_RS04520	NZ_CP011801	914278	915477	-	1200	phosphoglycerate kinase	811.532	538.579	474.663	253.949	523.44	513.238	479.744	633.043	497.597	NITMOv2_0983	pgk	Phosphoglycerate kinase	525.087	147.012	5.37891	1.50597	2.42731	361	33.4929	-0.430198	0.342603	-0.273233	0.338808	0.156966	0.357553	1.67103	0.433651	0.867735	33.4929	-0.430198	0.342603	-1.25568	0.209233	0.802865	33.4929	-0.273233	0.338808	-0.806453	0.419982	0.766005	33.4929	-0.703431	0.580078
NITMOv2_RS02540	NZ_CP011801	530149	531210	+	1062	tetratricopeptide repeat protein	815.098	494.458	623.908	398.539	443.593	683.489	479.535	325.137	401.612	NITMOv2_0555	-	conserved exported protein of unknown function	518.374	157.897	5.31014	1.61747	2.40875	362	29.562	-0.277403	0.339799	-0.773261	0.355038	-0.495858	0.370236	4.83337	0.089217	0.617878	29.562	-0.277403	0.339799	-0.816375	0.414286	0.916498	29.562	-0.773261	0.355038	-2.17797	0.0294085	0.310716	29.562	-1.05066	0.58818
NITMOv2_RS22130	NZ_CP011801	4553421	4554083	-	663	hypothetical protein	326.408	335.089	438.326	331.959	473.702	630.35	801.521	972.176	353.818	NITMOv2_4829	-	protein of unknown function	518.15	234.34	5.30784	2.40054	2.40813	363	18.1059	0.457357	0.444936	0.853076	0.433392	0.39572	0.4368	3.89041	0.142958	na	18.1059	0.457357	0.444936	1.02791	0.30399	na	18.1059	0.853076	0.433392	1.96837	0.0490252	na	18.1059	1.31043	0.762102
NITMOv2_RS09575	NZ_CP011801	1939952	1940449	-	498	type II 3-dehydroquinate dehydratase	434.555	1216.67	466.843	271.967	197.078	618.359	400.157	832.038	214.112	NITMOv2_2075	aroQ	3-dehydroquinate dehydratase	516.864	330.938	5.29468	3.39007	2.40454	364	13.4997	-0.83499	0.559298	-0.592334	0.548987	0.242656	0.590293	2.47837	0.289619	na	13.4997	-0.83499	0.559298	-1.49292	0.135457	na	13.4997	-0.592334	0.548987	-1.07896	0.280606	na	13.4997	-1.42732	0.938059
NITMOv2_RS15190	NZ_CP011801	3118869	3120668	-	1800	elongation factor 4	520.984	617.122	471.434	451.465	490.725	391.038	541.249	537.127	627.92	NITMOv2_3314	lepA	GTP-binding membrane protein	516.563	76.0451	5.29158	0.778994	2.4037	365	49.5607	-0.143653	0.266607	0.0255639	0.263289	0.169217	0.275189	0.441231	0.802025	0.937301	49.5607	-0.143653	0.266607	-0.538818	0.590013	0.93254	49.5607	0.0255639	0.263289	0.0970945	0.922651	0.986724	49.5607	-0.118089	0.452848
NITMOv2_RS01315	NZ_CP011801	286100	286711	+	612	ATP synthase F1 subunit delta	373.254	726.026	360.888	414.949	449.03	215.646	506.517	902.734	696.915	NITMOv2_0296	-	putative ATP synthase F1, delta subunit	516.218	216.748	5.28805	2.22034	2.40274	366	16.65	-0.250756	0.465496	0.499346	0.438844	0.750102	0.467209	2.79853	0.246779	na	16.65	-0.250756	0.465496	-0.538686	0.590104	na	16.65	0.499346	0.438844	1.13787	0.255176	na	16.65	0.24859	0.774763
NITMOv2_RS16995	NZ_CP011801	3499863	3500306	-	444	biopolymer transporter ExbD	406.172	727.81	235.63	571.957	751.561	297.242	598.433	622.155	432.276	NITMOv2_3699	exbD	Biopolymer transport protein ExbD	515.915	182.716	5.28495	1.87172	2.40189	367	12.2716	0.435268	0.522905	0.25569	0.530235	-0.179578	0.534458	0.701541	0.704145	na	12.2716	0.435268	0.522905	0.832402	0.405182	na	12.2716	0.25569	0.530235	0.48222	0.62965	na	12.2716	0.690957	0.907476
NITMOv2_RS09525	NZ_CP011801	1929225	1930097	-	873	ATP-binding protein	468.238	416.427	412.779	484.82	427.206	327.545	862.347	474.634	757.266	NITMOv2_2065	mrp	putative Protein Mrp, ATPase	514.585	175.742	5.27132	1.80027	2.39817	368	23.9146	0.0542901	0.383081	0.618735	0.367408	0.564445	0.381881	3.45891	0.177381	0.681664	23.9146	0.0542901	0.383081	0.141719	0.887302	0.980274	23.9146	0.618735	0.367408	1.68406	0.0921708	na	23.9146	0.673025	0.646256
NITMOv2_RS18065	NZ_CP011801	3715497	3716354	+	858	universal stress protein	798.711	870.954	433.544	414.369	663.451	307.635	309.679	509.761	323.115	NITMOv2_3935	-	putative Universal stress protein	514.58	214.475	5.27127	2.19705	2.39815	369	23.6698	-0.470277	0.394618	-0.948668	0.411443	-0.478391	0.431692	5.43679	0.0659805	0.523238	23.6698	-0.470277	0.394618	-1.19173	0.233368	0.817217	23.6698	-0.948668	0.411443	-2.30571	0.021127	na	23.6698	-1.41895	0.680926
NITMOv2_RS16225	NZ_CP011801	3335539	3336492	-	954	gfo/Idh/MocA family oxidoreductase	604.916	550.435	597.06	443.656	411.51	853.091	394.564	434.334	335.308	NITMOv2_3534	-	putative Oxidoreductase, Gfo/Idh/MocA family	513.875	157.904	5.26405	1.61754	2.39617	370	26.2894	0.0378492	0.3461	-0.675221	0.369014	-0.71307	0.379132	4.39614	0.111017	0.633815	26.2894	0.0378492	0.3461	0.109359	0.912918	0.980274	26.2894	-0.675221	0.369014	-1.8298	0.06728	0.454781	26.2894	-0.637372	0.606771
NITMOv2_RS05100	NZ_CP011801	1040882	1041901	-	1020	acyl-CoA desaturase	542.2	356.413	569.823	497.939	384.883	582.245	564.404	383.662	731.761	NITMOv2_1104	desC	Fatty acid desaturase, type 1	512.592	121.069	5.25091	1.24021	2.39257	371	27.9944	0.0729897	0.356804	0.102966	0.356253	0.0299764	0.366862	0.0908597	0.955587	0.992864	27.9944	0.0729897	0.356804	0.204565	0.837912	0.980274	27.9944	0.102966	0.356253	0.289025	0.772562	0.932403	27.9944	0.175956	0.611444
NITMOv2_RS17515	NZ_CP011801	3600315	3600839	+	525	hypothetical protein	687.011	653.989	309.984	483.712	448.663	418.97	590.454	438.471	568.683	NITMOv2_3817	-	conserved protein of unknown function	511.104	122.39	5.23567	1.25374	2.38837	372	14.3535	-0.157548	0.468849	-0.101697	0.466928	0.055851	0.489963	0.11827	0.942579	na	14.3535	-0.157548	0.468849	-0.336033	0.736846	na	14.3535	-0.101697	0.466928	-0.217801	0.827584	na	14.3535	-0.259246	0.797256
NITMOv2_RS01470	NZ_CP011801	312321	314252	-	1932	threonine--tRNA ligase	472.943	637.681	451.257	420.619	416.558	398.477	435.506	762.558	596.057	NITMOv2_0329	thrS	threonyl-tRNA synthetase	510.184	126.008	5.22624	1.29081	2.38577	373	52.231	-0.206592	0.27408	0.138815	0.267604	0.345407	0.280174	1.53327	0.464574	0.874976	52.231	-0.206592	0.27408	-0.753767	0.450989	0.925151	52.231	0.138815	0.267604	0.518732	0.603948	0.840403	52.231	-0.0677776	0.463644
NITMOv2_RS03950	NZ_CP011801	806345	806707	+	363	cupin domain-containing protein	463.685	445.107	352.254	279.834	486.67	545.353	670.97	697.568	646.23	NITMOv2_0859	-	conserved protein of unknown function	509.741	143.902	5.22171	1.47411	2.38452	374	9.78514	0.143069	0.551127	0.605354	0.529617	0.462285	0.549821	1.42651	0.490047	na	9.78514	0.143069	0.551127	0.259594	0.795177	na	9.78514	0.605354	0.529617	1.143	0.253037	na	9.78514	0.748423	0.930681
NITMOv2_RS09675	NZ_CP011801	1960637	1961296	-	660	hypothetical protein	710.432	397.814	493.156	513.028	327.15	333.271	670.97	488.297	646.23	NITMOv2_2097	-	conserved protein of unknown function	508.928	142.587	5.21337	1.46064	2.38222	375	17.936	-0.346073	0.432231	0.0751711	0.417241	0.421244	0.44484	1.01932	0.600701	na	17.936	-0.346073	0.432231	-0.800667	0.423325	na	17.936	0.0751711	0.417241	0.180162	0.857025	na	17.936	-0.270902	0.723841
NITMOv2_RS05665	NZ_CP011801	1153190	1153375	+	186	type Z 30S ribosomal protein S14	517.105	434.338	374.98	91.0211	316.597	354.773	238.086	990.096	1261.19	NITMOv2_1219	rpsZ	30S ribosomal protein S14 type Z	508.688	375.791	5.21091	3.84954	2.38154	376	4.93092	-0.747572	0.874466	0.830018	0.754549	1.57759	0.863095	3.5905	0.166086	na	4.93092	-0.747572	0.874466	-0.854889	0.392612	na	4.93092	0.830018	0.754549	1.10002	0.271324	na	4.93092	0.0824462	1.38677
NITMOv2_RS09520	NZ_CP011801	1928894	1929199	-	306	dioxygenase	628.638	660.023	455.859	442.612	449.03	215.646	651.236	376.139	696.915	NITMOv2_2064	-	Dioxygenase, ferredoxin subunit	508.455	160.934	5.20853	1.64858	2.38088	377	8.29978	-0.506635	0.603498	-0.0688064	0.578141	0.437829	0.628545	0.786863	0.674737	na	8.29978	-0.506635	0.603498	-0.839498	0.40119	na	8.29978	-0.0688064	0.578141	-0.119013	0.905265	na	8.29978	-0.575441	1.00092
NITMOv2_RS17525	NZ_CP011801	3601753	3602610	-	858	universal stress protein	378.337	612.022	677.412	414.369	388.92	358.908	593.551	563.42	571.665	NITMOv2_3819	-	putative Universal stress protein UspA	506.511	120.381	5.18862	1.23316	2.37535	378	23.052	-0.392773	0.375703	-0.0102533	0.363298	0.382519	0.389034	1.33684	0.512518	0.890786	23.052	-0.392773	0.375703	-1.04543	0.295822	0.832298	23.052	-0.0102533	0.363298	-0.0282227	0.977485	na	23.052	-0.403026	0.628434
NITMOv2_RS04470	NZ_CP011801	907252	907629	-	378	ribosome silencing factor	286.255	320.583	522.79	447.882	571.215	349.141	702.921	791.684	564.169	NITMOv2_0972	-	conserved protein of unknown function	506.293	172.83	5.18639	1.77044	2.37473	379	10.1534	0.375102	0.549307	0.766757	0.532639	0.391655	0.541492	2.08536	0.352508	na	10.1534	0.375102	0.549307	0.682864	0.494693	na	10.1534	0.766757	0.532639	1.43954	0.149997	na	10.1534	1.14186	0.936841
NITMOv2_RS00845	NZ_CP011801	191798	193120	-	1323	trigger factor	654.297	549.571	421.747	499.068	489.613	498.773	535.559	487.19	419.097	NITMOv2_0195	tig	Trigger factor	506.102	70.8319	5.18442	0.72559	2.37418	380	35.894	-0.0203121	0.304279	-0.251047	0.310304	-0.230734	0.320944	0.768955	0.680806	0.926213	35.894	-0.0203121	0.304279	-0.0667548	0.946777	0.980864	35.894	-0.251047	0.310304	-0.809035	0.418495	0.766005	35.894	-0.271359	0.52416
NITMOv2_RS18555	NZ_CP011801	3818424	3819068	+	645	DNA-binding response regulator	559.195	782.818	576.714	341.223	304.326	579.737	755.232	356.895	297.567	NITMOv2_4038	-	Response regulator, LuxR family	505.967	188.916	5.18305	1.93522	2.3738	381	17.3446	-0.541403	0.441189	-0.497991	0.439812	0.0434119	0.47006	1.97657	0.372215	na	17.3446	-0.541403	0.441189	-1.22715	0.219768	na	17.3446	-0.497991	0.439812	-1.13228	0.257515	na	17.3446	-1.03939	0.745123
NITMOv2_RS18620	NZ_CP011801	3830379	3830627	-	249	hypothetical protein	531.123	405.557	466.843	339.958	394.157	353.348	622.466	924.487	513.87	NITMOv2_4053	yjbJ	putative stress response protein	505.757	181.794	5.18089	1.86227	2.3732	382	6.63844	-0.278621	0.669375	0.450657	0.62415	0.729278	0.674765	1.2353	0.53921	na	6.63844	-0.278621	0.669375	-0.41624	0.677234	na	6.63844	0.450657	0.62415	0.722034	0.470274	na	6.63844	0.172037	1.10451
NITMOv2_RS03250	NZ_CP011801	667004	668260	-	1257	adenosylhomocysteinase	497.359	578.426	536.368	498.335	499.704	612.456	457.989	439.517	407.171	NITMOv2_0703	ahcY	Adenosylhomocysteinase	503.036	65.2751	5.15302	0.668667	2.36542	383	33.9202	0.106826	0.294518	-0.373369	0.307943	-0.480194	0.316526	2.50429	0.285891	0.773394	33.9202	0.106826	0.294518	0.362713	0.71682	0.958372	33.9202	-0.373369	0.307943	-1.21246	0.225336	0.619675	33.9202	-0.266543	0.512788
NITMOv2_RS19860	NZ_CP011801	4067414	4067824	+	411	Fe-S cluster assembly scaffold IscU	468.037	442.264	593.947	617.881	477.592	535.18	430.988	280.045	674.532	NITMOv2_4320	iscU	Iron-sulfur cluster assembly protein IscU	502.274	118.519	5.14521	1.21409	2.36323	384	11.1342	0.219709	0.505091	-0.192249	0.524786	-0.411958	0.536581	0.596738	0.742027	na	11.1342	0.219709	0.505091	0.434989	0.66357	na	11.1342	-0.192249	0.524786	-0.366338	0.714113	na	11.1342	0.0274602	0.879271
NITMOv2_RS17700	NZ_CP011801	3634628	3635062	-	435	CBS domain-containing protein	663.321	464.292	507.732	350.274	586.614	455.088	814.419	370.432	294.146	NITMOv2_3858	-	conserved protein of unknown function	500.702	165.062	5.12911	1.69087	2.35871	385	11.655	-0.151859	0.515095	-0.236159	0.519438	-0.0842997	0.543866	0.220779	0.895485	na	11.655	-0.151859	0.515095	-0.294818	0.768133	na	11.655	-0.236159	0.519438	-0.454643	0.649366	na	11.655	-0.388018	0.880049
NITMOv2_RS03425	NZ_CP011801	707337	707960	+	624	cytochrome c	500.946	453.131	502.979	542.626	597.678	634.497	532.26	295.125	444.283	NITMOv2_0738	-	putative monoheme cytochrome c	500.392	98.5974	5.12593	1.01002	2.35781	386	16.8517	0.37844	0.406633	-0.272576	0.431933	-0.651016	0.436891	2.29695	0.31712	na	16.8517	0.37844	0.406633	0.930667	0.352026	na	16.8517	-0.272576	0.431933	-0.631061	0.528	na	16.8517	0.105863	0.716212
NITMOv2_RS02780	NZ_CP011801	573769	575205	+	1437	hypothetical protein	384.86	491.917	622.88	435.913	519.069	673.5	493.072	432.521	430.37	NITMOv2_0605	-	putative sugar nucleotidyltransferase and phosphatidyltransferase (Bifunctional enzyme)	498.234	95.1424	5.10383	0.974624	2.35158	387	38.3329	0.210626	0.296672	-0.219336	0.306944	-0.429962	0.312896	1.89152	0.388385	0.857379	38.3329	0.210626	0.296672	0.709963	0.477727	0.925151	38.3329	-0.219336	0.306944	-0.714581	0.474868	0.792845	38.3329	-0.00871025	0.516288
NITMOv2_RS17345	NZ_CP011801	3571668	3573251	-	1584	phosphoglycerate dehydrogenase	645.157	586.521	462.334	545.092	371.762	416.589	573.12	435.98	444.283	NITMOv2_3776	serA	D-3-phosphoglycerate dehydrogenase	497.871	92.1411	5.10011	0.943878	2.35053	388	42.2535	-0.222222	0.295214	-0.293212	0.297033	-0.0709902	0.309948	1.10508	0.575487	0.89776	42.2535	-0.222222	0.295214	-0.752747	0.451602	0.925151	42.2535	-0.293212	0.297033	-0.987135	0.323576	0.69987	42.2535	-0.515433	0.50467
NITMOv2_RS20705	NZ_CP011801	4241385	4242413	-	1029	hypothetical protein	443.987	686.963	440.575	493.584	648.578	363.392	516.432	425.048	455.941	NITMOv2_4502	-	conserved exported protein of unknown function	497.167	106.16	5.09289	1.08748	2.34849	389	27.4397	0.0871463	0.3471	-0.211603	0.355846	-0.298749	0.365749	0.701665	0.704102	0.929113	27.4397	0.0871463	0.3471	0.25107	0.80176	0.980274	27.4397	-0.211603	0.355846	-0.594647	0.552079	0.830275	27.4397	-0.124457	0.600365
NITMOv2_RS18190	NZ_CP011801	3735046	3735495	-	450	cytochrome c	267.171	852.75	335.816	263.354	785.16	684.317	639.658	306.93	331.732	NITMOv2_3963	-	putative Cytochrome c55x	496.321	240.276	5.08423	2.46135	2.34603	390	11.9332	0.406252	0.547598	-0.181628	0.57177	-0.58788	0.576235	1.13948	0.565672	na	11.9332	0.406252	0.547598	0.741881	0.45816	na	11.9332	-0.181628	0.57177	-0.317659	0.750743	na	11.9332	0.224624	0.95996
NITMOv2_RS19770	NZ_CP011801	4053835	4054941	-	1107	deoxyhypusine synthase	543.031	638.559	682.552	443.512	319.171	377.527	460.042	519.867	481.608	NITMOv2_4302	-	putative Deoxyhypusine synthase	496.208	115.902	5.08307	1.18728	2.3457	391	29.2366	-0.587426	0.328336	-0.424092	0.323412	0.163335	0.349172	3.64525	0.161601	0.681664	29.2366	-0.587426	0.328336	-1.7891	0.0735987	0.587395	29.2366	-0.424092	0.323412	-1.31131	0.189754	0.600989	29.2366	-1.01152	0.550344
NITMOv2_RS00205	NZ_CP011801	45595	46548	-	954	UDP-3-O-acyl-N-acetylglucosamine deacetylase	453.687	508.093	414.287	603.373	370.359	507.243	487.403	651.502	469.431	NITMOv2_0043	lpxC	UDP-3-O-[3-hydroxymyristoyl] N-acetylglucosamine deacetylase	496.153	87.3321	5.08251	0.894616	2.34554	392	25.2997	0.23575	0.352822	0.154682	0.355403	-0.081068	0.363289	0.465068	0.792523	0.937301	25.2997	0.23575	0.352822	0.668183	0.504017	0.925151	25.2997	0.154682	0.355403	0.43523	0.663395	0.877705	25.2997	0.390432	0.607956
NITMOv2_RS15935	NZ_CP011801	3272430	3273971	-	1542	DegQ family serine endoprotease	491.2	366.737	474.927	483.085	585.561	613.375	416.419	537.426	484.044	NITMOv2_3472	-	putative periplasmic serine endoprotease DegP-like	494.752	76.9082	5.06816	0.787835	2.34146	393	40.9516	0.415286	0.281283	0.0123515	0.290328	-0.402935	0.292833	2.76059	0.251504	0.756317	40.9516	0.415286	0.281283	1.4764	0.139837	0.677738	40.9516	0.0123515	0.290328	0.042543	0.966066	0.98957	40.9516	0.427638	0.490989
NITMOv2_RS06495	NZ_CP011801	1326554	1327918	+	1365	TldD/PmbA family protein	651.78	517.865	502.446	359.683	546.449	596.226	308.204	539.657	421.825	NITMOv2_1413	pmbA	Peptidase U62	493.793	111.013	5.05833	1.1372	2.33866	394	36.0665	-0.0737242	0.308336	-0.48662	0.319125	-0.412895	0.329917	2.57439	0.276045	0.764431	36.0665	-0.0737242	0.308336	-0.239103	0.811026	0.980274	36.0665	-0.48662	0.319125	-1.52486	0.127295	0.54454	36.0665	-0.560344	0.533834
NITMOv2_RS11060	NZ_CP011801	2227883	2228704	+	822	molybdopterin-synthase adenylyltransferase MoeB	599.672	909.098	678.797	350.132	477.592	187.313	484.862	308.05	441.04	NITMOv2_2398	thiF	Adenylyltransferase ThiF	492.951	215.088	5.04971	2.20333	2.3362	395	21.6038	-0.958175	0.400644	-0.872953	0.397587	0.0852223	0.434692	7.72961	0.020967	na	21.6038	-0.958175	0.400644	-2.39158	0.0167758	na	21.6038	-0.872953	0.397587	-2.19562	0.0281188	na	21.6038	-1.83113	0.669497
NITMOv2_RS17545	NZ_CP011801	3607576	3609081	-	1506	formate dehydrogenase	471.009	616.898	470.842	415.941	391.016	438.166	632.209	458.56	523.936	NITMOv2_3823	fdsB	Formate dehydrogenase, beta subunit	490.953	84.5248	5.02924	0.865858	2.33034	396	39.3568	-0.198401	0.29249	-0.00246552	0.287988	0.195935	0.302788	0.573313	0.75077	0.9321	39.3568	-0.198401	0.29249	-0.678316	0.497571	0.925151	39.3568	-0.00246552	0.287988	-0.00856119	0.993169	0.994032	39.3568	-0.200866	0.495272
NITMOv2_RS07985	NZ_CP011801	1624898	1625443	+	546	HNH endonuclease	528.47	665.826	276.771	620.144	503.308	402.855	608.297	421.607	390.579	NITMOv2_1743	-	putative HNH endonuclease	490.873	128.023	5.02842	1.31145	2.33011	397	14.413	0.21572	0.468082	-0.089308	0.480333	-0.305028	0.490676	0.420758	0.810277	na	14.413	0.21572	0.468082	0.46086	0.644899	na	14.413	-0.089308	0.480333	-0.185929	0.8525	na	14.413	0.126412	0.811713
NITMOv2_RS05405	NZ_CP011801	1108051	1108488	-	438	hypothetical protein	411.736	968.336	345.016	502.486	179.26	703.066	556.078	262.782	486.886	NITMOv2_1165	-	conserved exported protein of unknown function	490.627	238.239	5.02591	2.44048	2.32938	398	11.4652	-0.160209	0.557464	-0.404013	0.568877	-0.243804	0.591383	0.504323	0.777119	na	11.4652	-0.160209	0.557464	-0.287389	0.773815	na	11.4652	-0.404013	0.568877	-0.710194	0.477584	na	11.4652	-0.564222	0.958666
NITMOv2_RS21610	NZ_CP011801	4447305	4448027	+	723	DNA-binding response regulator	532.125	474.888	659.198	608.822	461.54	273.808	398.128	445.749	560.424	NITMOv2_4714	phoP	Alkaline phosphatase synthesis transcriptional regulatory protein PhoP	490.52	116.003	5.02481	1.18832	2.32907	399	19.0617	-0.182638	0.409237	-0.331621	0.41494	-0.148983	0.434031	0.66766	0.716175	na	19.0617	-0.182638	0.409237	-0.446289	0.655388	na	19.0617	-0.331621	0.41494	-0.799204	0.424172	na	19.0617	-0.514259	0.700654
NITMOv2_RS21420	NZ_CP011801	4398776	4399249	-	474	hypothetical protein	1217.49	639.137	613.101	250.02	372.703	185.619	467.131	291.389	359.926	NITMOv2_4656	-	conserved exported protein of unknown function	488.502	313.748	5.00413	3.21398	2.32312	400	12.3838	-1.51555	0.536743	-1.23575	0.519863	0.279794	0.591365	10.5989	0.00499445	na	12.3838	-1.51555	0.536743	-2.8236	0.00474875	na	12.3838	-1.23575	0.519863	-2.37708	0.0174504	na	12.3838	-2.7513	0.875779
NITMOv2_RS11695	NZ_CP011801	2367640	2368824	+	1185	hypothetical protein	466.704	426.091	588.577	514.327	496.937	593.982	336.334	505.074	431.911	NITMOv2_2530	-	conserved protein of unknown function	484.438	81.1888	4.9625	0.831684	2.31107	401	30.8287	0.205261	0.314562	-0.311082	0.329084	-0.516343	0.335982	2.38373	0.303655	0.789503	30.8287	0.205261	0.314562	0.65253	0.514059	0.925151	30.8287	-0.311082	0.329084	-0.945295	0.344509	0.71695	30.8287	-0.10582	0.549188
NITMOv2_RS07370	NZ_CP011801	1499759	1500478	+	720	hypothetical protein	500.946	617.122	435.915	446.762	299.888	366.598	461.292	543.521	681.234	NITMOv2_1606	-	Adenosylcobinamide amidohydrolase	483.698	118.505	4.95492	1.21394	2.30886	402	18.5056	-0.341202	0.412497	0.0654136	0.397682	0.406616	0.425732	1.0455	0.592889	na	18.5056	-0.341202	0.412497	-0.827163	0.408144	na	18.5056	0.0654136	0.397682	0.164487	0.869348	na	18.5056	-0.275789	0.689465
NITMOv2_RS07955	NZ_CP011801	1622009	1622296	-	288	hypothetical protein	333.964	210.382	686.162	352.707	613.407	763.747	538.174	399.648	444.283	NITMOv2_1737	-	protein of unknown function	482.497	181.003	4.94262	1.85416	2.30528	403	7.44997	0.515519	0.625637	0.0409107	0.651413	-0.474608	0.653346	0.825287	0.661898	na	7.44997	0.515519	0.625637	0.823991	0.409945	na	7.44997	0.0409107	0.651413	0.062803	0.949923	na	7.44997	0.55643	1.09757
NITMOv2_RS03290	NZ_CP011801	675414	676406	+	993	ketoacyl-ACP synthase III	544.835	528.816	573.611	392.133	533.719	509.472	602.049	394.094	257.711	NITMOv2_0711	fabH	3-oxoacyl-[acyl-carrier-protein] synthase 3	481.827	110.952	4.93576	1.13657	2.30327	404	25.6271	-0.104359	0.352549	-0.475601	0.364536	-0.371241	0.378566	1.80947	0.404649	0.867735	25.6271	-0.104359	0.352549	-0.296013	0.76722	0.980274	25.6271	-0.475601	0.364536	-1.30467	0.192004	0.600989	25.6271	-0.57996	0.609134
NITMOv2_RS03935	NZ_CP011801	802893	803543	+	651	phosphatidylserine decarboxylase family protein	498.637	558.435	785.673	338.078	391.977	371.667	544.197	353.606	491.373	NITMOv2_0856	psd	Phosphatidylserine decarboxylase proenzyme	481.516	141.318	4.93257	1.44764	2.30234	405	16.6943	-0.644193	0.428418	-0.483443	0.421823	0.16075	0.457934	2.65435	0.265225	na	16.6943	-0.644193	0.428418	-1.50366	0.13267	na	16.6943	-0.483443	0.421823	-1.14608	0.251762	na	16.6943	-1.12764	0.716414
NITMOv2_RS11065	NZ_CP011801	2228717	2229967	+	1251	threonine synthase	432.471	452.045	408.852	554.858	423.648	474.732	513.284	662.438	409.124	NITMOv2_2399	thrC	Threonine synthase	481.272	83.8972	4.93008	0.85943	2.30161	406	32.1674	0.289257	0.317159	0.21432	0.319236	-0.074937	0.325044	0.902683	0.636773	0.917781	32.1674	0.289257	0.317159	0.912026	0.361755	0.890601	32.1674	0.21432	0.319236	0.671354	0.501995	0.794002	32.1674	0.503577	0.547128
NITMOv2_RS16940	NZ_CP011801	3487941	3488858	-	918	DUF4115 domain-containing protein	419.092	660.023	531.835	276.633	277.971	670.899	482.397	651.975	348.458	NITMOv2_3687	-	conserved protein of unknown function	479.92	159.807	4.91623	1.63704	2.29755	407	23.2677	-0.302785	0.394841	-0.182981	0.391379	0.119804	0.411849	0.606412	0.738447	0.9321	23.2677	-0.302785	0.394841	-0.766854	0.443168	0.925151	23.2677	-0.182981	0.391379	-0.46753	0.640121	na	23.2677	-0.485767	0.669727
NITMOv2_RS19165	NZ_CP011801	3938662	3938916	-	255	exodeoxyribonuclease VII small subunit	612.922	396.014	547.03	199.176	384.883	517.551	434.157	722.188	501.779	NITMOv2_4167	xseB	Exodeoxyribonuclease 7 small subunit	479.522	149.901	4.91215	1.53557	2.29635	408	6.45944	-0.458024	0.672388	-0.0188315	0.643511	0.439192	0.699066	0.55795	0.756559	na	6.45944	-0.458024	0.672388	-0.68119	0.495752	na	6.45944	-0.0188315	0.643511	-0.0292637	0.976654	na	6.45944	-0.476855	1.11523
NITMOv2_RS07320	NZ_CP011801	1490879	1491661	+	783	precorrin-2 C(20)-methyltransferase	506.704	541.674	400.841	410.816	576.587	421.378	311.063	382.192	762.601	NITMOv2_1597	cobI	Precorrin-2 C(20)-methyltransferase	479.317	135.231	4.91005	1.38529	2.29574	409	20.1146	0.0766177	0.40938	-0.0463851	0.41364	-0.123003	0.425923	0.0858409	0.957988	na	20.1146	0.0766177	0.40938	0.187156	0.851539	na	20.1146	-0.0463851	0.41364	-0.112139	0.910713	na	20.1146	0.0302326	0.70425
NITMOv2_RS23015	NZ_CP011801	3952746	3952988	-	243	hypothetical protein	197.905	415.57	430.533	487.693	323.111	452.591	911.194	568.388	526.558	NITMOv2_4182	-	putative ATP synthase F0, subunit I	479.283	196.056	4.90969	2.00837	2.29563	410	6.17407	0.416358	0.703436	0.894813	0.677154	0.478455	0.686589	1.76224	0.414318	na	6.17407	0.416358	0.703436	0.591892	0.553923	na	6.17407	0.894813	0.677154	1.32143	0.186357	na	6.17407	1.31117	1.19805
NITMOv2_RS10460	NZ_CP011801	2115301	2115564	-	264	thioredoxin	364.324	535.519	528.381	64.1285	297.409	333.271	838.713	784.763	565.451	NITMOv2_2266	-	putative Thioredoxin	479.107	243.791	4.90789	2.49736	2.2951	411	6.58178	-0.977259	0.735885	0.551878	0.626351	1.52914	0.73651	4.47948	0.106486	na	6.58178	-0.977259	0.735885	-1.328	0.184177	na	6.58178	0.551878	0.626351	0.8811	0.378264	na	6.58178	-0.425381	1.15119
NITMOv2_RS01655	NZ_CP011801	348397	348924	-	528	hypothetical protein	409.865	229.508	550.397	577.157	371.762	374.93	503.228	479.578	807.788	NITMOv2_0369	-	conserved exported protein of unknown function	478.246	163.084	4.89907	1.67061	2.29251	412	13.5201	0.237271	0.494444	0.476824	0.485883	0.239553	0.49742	0.968883	0.616041	na	13.5201	0.237271	0.494444	0.479875	0.631316	na	13.5201	0.476824	0.485883	0.981356	0.326417	na	13.5201	0.714096	0.844801
NITMOv2_RS06505	NZ_CP011801	1328682	1329140	+	459	hypothetical protein	445.285	704.025	683.788	331.959	342.118	431.292	482.397	451.367	418.149	NITMOv2_1415	-	conserved protein of unknown function	476.709	132.653	4.88333	1.35888	2.28787	413	11.6162	-0.61501	0.496901	-0.497823	0.491082	0.117187	0.534448	1.86383	0.393799	na	11.6162	-0.61501	0.496901	-1.23769	0.21583	na	11.6162	-0.497823	0.491082	-1.01373	0.310713	na	11.6162	-1.11283	0.830969
NITMOv2_RS08420	NZ_CP011801	1715047	1715937	+	891	ABC transporter ATP-binding protein	377.818	589.354	404.44	551.03	594.819	444.362	521.866	490.881	311.148	NITMOv2_1829	hmuV	Hemin import ATP-binding protein HmuV	476.191	98.6529	4.87802	1.01058	2.2863	414	22.7896	0.361657	0.367648	-0.100379	0.382221	-0.462036	0.386889	1.65103	0.43801	0.867735	22.7896	0.361657	0.367648	0.983702	0.325262	0.869843	22.7896	-0.100379	0.382221	-0.262621	0.792843	na	22.7896	0.261278	0.642521
NITMOv2_RS06690	NZ_CP011801	1366183	1366464	+	282	DUF507 domain-containing protein	426.337	716.196	82.4425	300.176	626.458	623.997	157.036	653.042	680.604	NITMOv2_1454	-	conserved protein of unknown function	474.032	241.198	4.85591	2.4708	2.27974	415	7.1148	0.500376	0.710906	0.283054	0.722027	-0.217322	0.724496	0.499169	0.779124	na	7.1148	0.500376	0.710906	0.703856	0.481522	na	7.1148	0.283054	0.722027	0.392027	0.695038	na	7.1148	0.78343	1.23634
NITMOv2_RS11005	NZ_CP011801	2219038	2219313	-	276	hypothetical protein	392.045	585.412	589.643	490.723	355.598	79.6953	641.798	667.238	463.6	NITMOv2_2386	-	conserved protein of unknown function	473.972	182.99	4.8553	1.87452	2.27956	416	6.93288	-0.574766	0.67459	0.11165	0.631262	0.686415	0.693259	1.11616	0.572307	na	6.93288	-0.574766	0.67459	-0.852022	0.394202	na	6.93288	0.11165	0.631262	0.176867	0.859613	na	6.93288	-0.463116	1.10748
NITMOv2_RS01625	NZ_CP011801	344068	345069	+	1002	hypothetical protein	515.944	524.066	464.048	523.78	705.234	417.088	353.565	413.528	340.529	NITMOv2_0362	-	conserved protein of unknown function	473.087	111.535	4.84623	1.14254	2.27686	417	25.5982	0.249246	0.341178	-0.516258	0.365642	-0.765504	0.371952	4.34749	0.113751	0.633815	25.5982	0.249246	0.341178	0.730545	0.465057	0.925151	25.5982	-0.516258	0.365642	-1.41192	0.157973	0.5869	25.5982	-0.267012	0.601536
NITMOv2_RS20510	NZ_CP011801	4201411	4201686	-	276	integration host factor subunit alpha	522.726	219.53	505.408	306.702	213.359	239.086	401.124	917.453	927.2	NITMOv2_4463	ihfA	Integration host factor subunit alpha	472.51	279.856	4.84031	2.8668	2.2751	418	6.84408	-0.647852	0.716896	0.715229	0.630986	1.36308	0.711321	3.89297	0.142775	na	6.84408	-0.647852	0.716896	-0.903691	0.366159	na	6.84408	0.715229	0.630986	1.13351	0.257	na	6.84408	0.0673764	1.14812
NITMOv2_RS18275	NZ_CP011801	3752544	3753011	-	468	hypothetical protein	436.722	302.088	322.9	180.875	545.25	375.998	615.056	737.812	729.08	NITMOv2_3980	-	conserved exported protein of unknown function	471.754	196.498	4.83257	2.01289	2.27279	419	11.6372	0.115272	0.533357	0.875448	0.502161	0.760176	0.522857	3.62562	0.163195	na	11.6372	0.115272	0.533357	0.216125	0.82889	na	11.6372	0.875448	0.502161	1.74336	0.0812708	na	11.6372	0.99072	0.894366
NITMOv2_RS10520	NZ_CP011801	2127636	2128016	-	381	PilZ domain-containing protein	347.112	318.059	518.674	222.178	515.197	461.856	523.04	664.612	671.672	NITMOv2_2282	-	protein of unknown function	471.378	152.243	4.82872	1.55955	2.27164	420	9.49195	0.0751324	0.566896	0.552326	0.544474	0.477194	0.567634	1.19843	0.549242	na	9.49195	0.0751324	0.566896	0.132533	0.894563	na	9.49195	0.552326	0.544474	1.01442	0.310381	na	9.49195	0.627459	0.955739
NITMOv2_RS04740	NZ_CP011801	961946	962269	+	324	hypothetical protein	371.071	561.02	609.922	470.276	242.333	610.997	615.056	355.243	394.919	NITMOv2_1027	-	conserved exported protein of unknown function	470.093	136.569	4.81556	1.399	2.2677	421	8.12785	-0.110942	0.592759	-0.235964	0.600508	-0.125022	0.629053	0.155333	0.925273	na	8.12785	-0.110942	0.592759	-0.187162	0.851534	na	8.12785	-0.235964	0.600508	-0.392941	0.694363	na	8.12785	-0.346906	1.01402
NITMOv2_RS08170	NZ_CP011801	1659334	1660227	+	894	dihydropteroate synthase	497.584	384.054	416.086	359.808	483.041	516.682	643.951	592.23	333.958	NITMOv2_1781	folP	7,8-dihydropteroate synthase	469.71	105.624	4.81164	1.082	2.26653	422	22.3642	0.147141	0.377886	0.179064	0.37719	0.0319222	0.388026	0.261093	0.877616	0.964141	22.3642	0.147141	0.377886	0.38938	0.696995	0.954415	22.3642	0.179064	0.37719	0.47473	0.634979	na	22.3642	0.326205	0.647748
NITMOv2_RS03815	NZ_CP011801	780798	781403	+	606	imidazoleglycerol-phosphate dehydratase HisB	476.146	533.247	460.372	363.183	388.693	689.641	365.38	455.836	492.671	NITMOv2_0826	hisB	Imidazoleglycerol-phosphate dehydratase	469.463	101.274	4.80911	1.03743	2.26577	423	15.1851	0.0614661	0.434133	-0.22705	0.446386	-0.288516	0.461471	0.431664	0.805871	na	15.1851	0.0614661	0.434133	0.141584	0.887409	na	15.1851	-0.22705	0.446386	-0.508639	0.611005	na	15.1851	-0.165583	0.750006
NITMOv2_RS17355	NZ_CP011801	3574725	3576011	+	1287	LysM peptidoglycan-binding domain-containing protein	504.449	470.786	469.672	447.255	701.581	273.453	447.314	411.386	497.1	NITMOv2_3778	-	putative Lytic murein transglycosylase	469.222	111.043	4.80663	1.13751	2.26503	424	32.4656	0.0953895	0.337957	-0.166302	0.344556	-0.261692	0.353037	0.56115	0.755349	0.9321	32.4656	0.0953895	0.337957	0.282253	0.777749	0.980274	32.4656	-0.166302	0.344556	-0.482656	0.62934	0.859205	32.4656	-0.0709127	0.584152
NITMOv2_RS11680	NZ_CP011801	2365692	2366414	+	723	chlorite dismutase	432.352	419.019	289.404	679.07	597.287	578.039	490.003	382.07	353.952	NITMOv2_2527	cld2	Chlorite dismutase	469.022	127.381	4.80458	1.30487	2.26441	425	18.3815	0.827023	0.398804	0.0391331	0.425571	-0.78789	0.418426	5.46948	0.064911	na	18.3815	0.827023	0.398804	2.07376	0.0381019	na	18.3815	0.0391331	0.425571	0.0919543	0.926734	na	18.3815	0.866156	0.710795
NITMOv2_RS08145	NZ_CP011801	1653349	1654320	+	972	porphobilinogen synthase	470.023	498.684	574.044	261.264	363.5	588.368	660.616	378.926	416.858	NITMOv2_1776	hemB	porphobilinogen synthase	468.032	126.486	4.79444	1.2957	2.26136	426	24.1675	-0.274297	0.376374	-0.156723	0.372991	0.117574	0.392923	0.544918	0.761504	0.9321	24.1675	-0.274297	0.376374	-0.728789	0.466131	0.925151	24.1675	-0.156723	0.372991	-0.420179	0.674355	na	24.1675	-0.43102	0.6381
NITMOv2_RS03045	NZ_CP011801	626881	627624	+	744	3-oxoacyl-[acyl-carrier-protein] reductase	339.35	787.238	484.35	432.35	422.129	502.595	386.89	309.405	544.605	NITMOv2_0659	fabG	3-oxoacyl-[acyl-carrier-protein] reductase	467.657	141.819	4.7906	1.45277	2.26021	427	18.5993	-0.0969792	0.416202	-0.394511	0.427456	-0.297532	0.44414	0.889539	0.640972	na	18.5993	-0.0969792	0.416202	-0.23301	0.815754	na	18.5993	-0.394511	0.427456	-0.92293	0.356044	na	18.5993	-0.491491	0.717373
NITMOv2_RS01255	NZ_CP011801	275459	275596	+	138	50S ribosomal protein L34	0	439.059	252.704	368.042	426.718	1115.73	481.348	500.429	618.133	NITMOv2_0282	rpmH	50S ribosomal protein L34	466.908	300.256	4.78293	3.07577	2.25789	428	3.4292	1.67172	0.992702	1.2822	1.0177	-0.389516	0.924897	2.98286	0.22505	na	3.4292	1.67172	0.992702	1.68401	0.0921806	na	3.4292	1.2822	1.0177	1.2599	0.207704	na	3.4292	2.95392	1.78519
NITMOv2_RS17170	NZ_CP011801	3531243	3532247	+	1005	polyprenyl synthetase family protein	346.924	522.502	474.229	471.68	351.564	328.297	396.573	710.061	594.146	NITMOv2_3737	ispB	Octaprenyl-diphosphate synthase	466.22	127.64	4.77588	1.30753	2.25577	429	24.8603	-0.0782451	0.369731	0.27826	0.359633	0.356505	0.376264	1.02604	0.598686	0.909564	24.8603	-0.0782451	0.369731	-0.211627	0.832398	0.980274	24.8603	0.27826	0.359633	0.773733	0.439089	0.782635	24.8603	0.200015	0.624899
NITMOv2_RS11260	NZ_CP011801	2261847	2262320	+	474	hypothetical protein	431.194	511.309	539.529	285.737	372.703	510.454	607.271	485.648	449.907	NITMOv2_2439	-	protein of unknown function	465.972	95.1633	4.77335	0.974838	2.255	430	11.7131	-0.255427	0.496031	-0.013145	0.484784	0.242282	0.516659	0.316378	0.853688	na	11.7131	-0.255427	0.496031	-0.514941	0.606594	na	11.7131	-0.013145	0.484784	-0.0271151	0.978368	na	11.7131	-0.268571	0.833779
NITMOv2_RS05545	NZ_CP011801	1130760	1131296	+	537	transcription termination/antitermination protein NusG	425.384	300.882	584.467	567.484	328.978	409.607	288.63	685.876	595.687	NITMOv2_1195	nusG	transcription termination factor	465.222	146.553	4.76566	1.50126	2.25267	431	13.345	0.0886827	0.490622	0.147898	0.488643	0.0592153	0.504478	0.0958928	0.953185	na	13.345	0.0886827	0.490622	0.180756	0.856559	na	13.345	0.147898	0.488643	0.302671	0.762141	na	13.345	0.236581	0.839325
NITMOv2_RS17385	NZ_CP011801	3581122	3581952	-	831	formylglycine-generating enzyme family protein	622.113	680.515	615.491	305.594	401.556	370.569	639.481	277.012	256.626	NITMOv2_3784	-	conserved exported protein of unknown function	463.218	173.676	4.74513	1.7791	2.24645	432	20.5381	-0.725716	0.402223	-0.776373	0.404605	-0.0506564	0.436194	5.03793	0.0805429	na	20.5381	-0.725716	0.402223	-1.80426	0.07119	na	20.5381	-0.776373	0.404605	-1.91884	0.0550045	na	20.5381	-1.50209	0.678758
NITMOv2_RS02370	NZ_CP011801	488965	490455	-	1491	beta-ketoacyl-[acyl-carrier-protein] synthase family protein	467.684	419.918	413.208	533.673	276.465	457.326	386.112	524.93	686.538	NITMOv2_0518	fabF	3-oxoacyl-[acyl-carrier-protein] synthase 2	462.873	113.96	4.74159	1.16739	2.24537	433	36.8639	0.0766016	0.326098	0.220912	0.32317	0.144311	0.332247	0.479002	0.78702	0.937301	36.8639	0.0766016	0.326098	0.234903	0.814284	0.980274	36.8639	0.220912	0.32317	0.683579	0.494241	0.792845	36.8639	0.297514	0.557826
NITMOv2_RS10770	NZ_CP011801	2178415	2179050	-	636	peroxiredoxin	340.265	476.338	603.152	585.626	493.812	415.017	382.959	398.14	469.431	NITMOv2_2336	bcp3	Peroxiredoxin	462.749	89.3221	4.74033	0.915001	2.24499	434	15.8395	0.200008	0.428368	-0.253097	0.446491	-0.453106	0.456687	0.989959	0.609583	na	15.8395	0.200008	0.428368	0.466908	0.640565	na	15.8395	-0.253097	0.446491	-0.566859	0.57081	na	15.8395	-0.0530888	0.74642
NITMOv2_RS05695	NZ_CP011801	1155599	1156048	+	450	50S ribosomal protein L15	347.322	538.579	439.144	489.087	392.58	635.437	295.227	306.93	710.853	NITMOv2_1225	rplO	50S ribosomal subunit protein L15	461.684	145.326	4.72942	1.4887	2.24166	435	11.1497	0.318515	0.51619	-0.0488088	0.533094	-0.367324	0.541578	0.569096	0.752354	na	11.1497	0.318515	0.51619	0.61705	0.537202	na	11.1497	-0.0488088	0.533094	-0.0915577	0.927049	na	11.1497	0.269706	0.898874
NITMOv2_RS11600	NZ_CP011801	2344287	2345594	+	1308	MFS transporter	670.992	509.55	515.455	323.584	270.124	386.778	694.054	387.182	391.295	NITMOv2_2510	-	putative Permease, MFS family	461.002	147.846	4.72243	1.51451	2.23953	436	32.0632	-0.698927	0.342702	-0.286276	0.331269	0.412652	0.357799	4.2095	0.121876	0.640877	32.0632	-0.698927	0.342702	-2.03946	0.041404	0.55363	32.0632	-0.286276	0.331269	-0.864178	0.38749	0.746465	32.0632	-0.985203	0.571269
NITMOv2_RS03340	NZ_CP011801	689798	690556	+	759	ABC transporter ATP-binding protein	411.845	319.316	474.778	379.195	387.925	521.642	612.625	363.948	674.327	NITMOv2_0722	yrbF	toluene transporter subunit ATP-binding component of ABC superfamily	460.622	120.575	4.71854	1.23515	2.23834	437	18.6527	0.167751	0.414127	0.364998	0.407943	0.197247	0.419865	0.803923	0.669007	na	18.6527	0.167751	0.414127	0.405072	0.685425	na	18.6527	0.364998	0.407943	0.894728	0.370932	na	18.6527	0.532749	0.706789
NITMOv2_RS03085	NZ_CP011801	633731	634591	+	861	bifunctional methylenetetrahydrofolate dehydrogenase/methenyltetrahydrofolate cyclohydrolase FolD	390.982	539.517	472.536	412.925	592.746	357.657	360.033	695.137	321.989	NITMOv2_0668	folD	bifunctional 5,10-methylene-tetrahydrofolate dehydrogenase and 5,10-methylene-tetrahydrofolate cyclohydrolase	460.391	125.441	4.71618	1.285	2.23762	438	21.1379	0.0871493	0.392459	-0.100753	0.398792	-0.187902	0.410511	0.209951	0.900347	na	21.1379	0.0871493	0.392459	0.222059	0.824268	na	21.1379	-0.100753	0.398792	-0.252644	0.800543	na	21.1379	-0.0136033	0.676461
NITMOv2_RS05450	NZ_CP011801	1115302	1116297	-	996	MFS transporter	374.2	527.224	350.132	458.944	571.527	287.095	355.695	762.702	449.636	NITMOv2_1175	-	ABC-type transport system, ATPase component	459.684	145.302	4.70893	1.48845	2.2354	439	24.3857	0.223728	0.385663	0.264468	0.3848	0.0407404	0.392816	0.551793	0.758891	0.9321	24.3857	0.223728	0.385663	0.580111	0.56184	0.925151	24.3857	0.264468	0.3848	0.687287	0.491902	na	24.3857	0.488196	0.662805
NITMOv2_RS15275	NZ_CP011801	3137767	3138264	-	498	hypothetical protein	434.555	527.224	350.132	271.967	236.494	353.348	578.005	785.814	599.515	NITMOv2_3333	-	protein of unknown function	459.673	177.998	4.70881	1.82338	2.23536	440	12.012	-0.485865	0.518083	0.524206	0.470198	1.01007	0.519497	3.90656	0.141808	na	12.012	-0.485865	0.518083	-0.937813	0.348341	na	12.012	0.524206	0.470198	1.11486	0.264909	na	12.012	0.0383416	0.84209
NITMOv2_RS00110	NZ_CP011801	22803	25898	+	3096	AcrB/AcrD/AcrF family protein	353.38	541.449	461.822	295.289	519.89	539.951	514.931	602.26	303.077	NITMOv2_0022	-	Multidrug efflux system protein	459.117	113.461	4.70312	1.16227	2.23362	441	75.4957	0.102661	0.268373	-0.00242129	0.269853	-0.105082	0.274578	0.196961	0.906214	0.977207	75.4957	0.102661	0.268373	0.38253	0.702068	0.955324	75.4957	-0.00242129	0.269853	-0.00897263	0.992841	0.994032	75.4957	0.100239	0.462922
NITMOv2_RS06200	NZ_CP011801	1256659	1257105	-	447	hypothetical protein	349.653	632.559	338.07	454.495	175.651	442.871	445.812	411.986	858.749	NITMOv2_1341	-	exported protein of unknown function	456.65	193.457	4.67784	1.98174	2.22584	442	10.8362	-0.137799	0.55977	0.362958	0.537744	0.500757	0.566702	0.867899	0.647945	na	10.8362	-0.137799	0.55977	-0.246171	0.80555	na	10.8362	0.362958	0.537744	0.674964	0.499698	na	10.8362	0.225159	0.940144
NITMOv2_RS03810	NZ_CP011801	779518	780801	+	1284	histidinol dehydrogenase	449.447	487.615	425.503	329.633	504.484	325.485	482.848	537.844	564.697	NITMOv2_0825	hisD	Histidinol dehydrogenase	456.395	84.0826	4.67524	0.861328	2.22504	443	31.164	-0.117942	0.323844	0.150921	0.31688	0.268863	0.332447	0.661662	0.718326	0.9321	31.164	-0.117942	0.323844	-0.364195	0.715712	0.958372	31.164	0.150921	0.31688	0.476272	0.633881	0.85931	31.164	0.0329787	0.547773
NITMOv2_RS10395	NZ_CP011801	2103026	2103253	+	228	hypothetical protein	685.505	442.91	509.842	445.524	172.184	482.366	679.799	302.891	374.133	NITMOv2_2253	-	conserved protein of unknown function	455.017	164.818	4.66112	1.68837	2.22068	444	5.54707	-0.487981	0.720634	-0.363616	0.712056	0.124365	0.767955	0.53349	0.765868	na	5.54707	-0.487981	0.720634	-0.677156	0.498307	na	5.54707	-0.363616	0.712056	-0.510657	0.609591	na	5.54707	-0.851598	1.20951
NITMOv2_RS02360	NZ_CP011801	487223	487984	+	762	GNAT family N-acetyltransferase	583.779	503.593	411.888	355.484	463.677	490.722	552.098	362.515	363.823	NITMOv2_0516	aubI	N-acyl-L-homoserine lactone synthetase	454.175	85.4015	4.6525	0.87484	2.21801	445	18.5228	-0.100962	0.40061	-0.304638	0.408622	-0.203677	0.426468	0.566214	0.753439	na	18.5228	-0.100962	0.40061	-0.25202	0.801026	na	18.5228	-0.304638	0.408622	-0.745526	0.455954	na	18.5228	-0.4056	0.687783
NITMOv2_RS04440	NZ_CP011801	899987	900685	+	699	ABC transporter ATP-binding protein	412.797	288.937	532.161	339.083	449.305	818.16	506.827	329.324	396.613	NITMOv2_0966	-	conserved protein of unknown function	452.579	159.1	4.63614	1.6298	2.21292	446	16.9592	0.422992	0.435164	-0.10292	0.453745	-0.525912	0.457311	1.55673	0.459156	na	16.9592	0.422992	0.435164	0.972029	0.331036	na	16.9592	-0.10292	0.453745	-0.226822	0.820562	na	16.9592	0.320073	0.762477
NITMOv2_RS05070	NZ_CP011801	1037112	1037612	-	501	hypothetical protein	383.958	564.379	324.833	675.845	666.054	307.328	486.152	275.685	383.095	NITMOv2_1097	-	conserved exported protein of unknown function	451.926	153.006	4.62945	1.56737	2.21084	447	12.2878	0.544556	0.495252	-0.185623	0.526633	-0.730179	0.527068	2.20488	0.33206	na	12.2878	0.544556	0.495252	1.09955	0.271527	na	12.2878	-0.185623	0.526633	-0.352471	0.724485	na	12.2878	0.358933	0.876032
NITMOv2_RS16900	NZ_CP011801	3477264	3478136	-	873	twin-arginine translocase subunit TatC	454.466	347.023	399.464	349.071	359.753	755.873	608.715	474.634	317.563	NITMOv2_3678	tatC	Twin-arginine targeting protein translocase TatC	451.84	145.075	4.62858	1.48613	2.21057	448	21.041	0.347129	0.401707	0.128077	0.408521	-0.219052	0.413805	0.762515	0.683002	na	21.041	0.347129	0.401707	0.864135	0.387514	na	21.041	0.128077	0.408521	0.313513	0.753891	na	21.041	0.475205	0.696621
NITMOv2_RS09625	NZ_CP011801	1950715	1951575	+	861	inorganic polyphosphate kinase	460.8	398.774	337.526	550.567	341.969	459.845	488.616	507.985	520.137	NITMOv2_2086	ppnK	putative inorganic polyphosphate/ATP-NAD kinase	451.802	76.6615	4.62819	0.785308	2.21045	449	20.8332	0.293037	0.384812	0.264589	0.38599	-0.0284477	0.393421	0.71239	0.700336	na	20.8332	0.293037	0.384812	0.761506	0.446355	na	20.8332	0.264589	0.38599	0.685483	0.493039	na	20.8332	0.557626	0.66284
NITMOv2_RS01325	NZ_CP011801	288361	289239	+	879	ATP synthase F1 subunit gamma	465.042	620.377	568.656	385.209	290.304	300.285	428.23	497.582	509.485	NITMOv2_0298	atpG	ATP synthase F1, gamma subunit	451.686	112.75	4.62699	1.15499	2.21008	450	21.0819	-0.625778	0.382915	-0.266443	0.369599	0.359335	0.403242	2.70925	0.258045	na	21.0819	-0.625778	0.382915	-1.63425	0.102207	na	21.0819	-0.266443	0.369599	-0.720897	0.470973	na	21.0819	-0.892222	0.635493
NITMOv2_RS17105	NZ_CP011801	3518115	3518420	-	306	hypothetical protein	157.159	660.023	455.859	442.612	384.883	215.646	361.798	827.507	557.532	NITMOv2_3722	-	conserved protein of unknown function	451.447	209.449	4.62455	2.14556	2.20931	451	7.28791	-0.0836854	0.674273	0.437424	0.646281	0.52111	0.679789	0.71738	0.698591	na	7.28791	-0.0836854	0.674273	-0.124112	0.901227	na	7.28791	0.437424	0.646281	0.676833	0.498512	na	7.28791	0.353739	1.13249
NITMOv2_RS01835	NZ_CP011801	380555	381358	+	804	4-hydroxy-tetrahydrodipicolinate reductase	373.84	502.406	506.037	421.142	439.455	355.655	578.336	486.736	397.866	NITMOv2_0407	dapB	4-hydroxy-tetrahydrodipicolinate reductase	451.275	72.5041	4.62279	0.742721	2.20876	452	19.3429	-0.0581323	0.392702	0.0153172	0.390426	0.0734496	0.408266	0.0363585	0.981985	na	19.3429	-0.0581323	0.392702	-0.148032	0.882318	na	19.3429	0.0153172	0.390426	0.0392322	0.968705	na	19.3429	-0.0428151	0.668291
NITMOv2_RS20635	NZ_CP011801	4228429	4228746	-	318	hypothetical protein	529.301	317.558	511.766	319.433	555.538	276.678	417.774	723.891	402.37	NITMOv2_4488	-	putative 2Fe-2S ferredoxin	450.479	143.262	4.61463	1.46755	2.20622	453	7.61655	-0.161543	0.618971	0.0633108	0.606541	0.224854	0.641125	0.133035	0.935647	na	7.61655	-0.161543	0.618971	-0.260986	0.794103	na	7.61655	0.0633108	0.606541	0.10438	0.916868	na	7.61655	-0.0982319	1.04451
NITMOv2_RS02900	NZ_CP011801	601086	601883	+	798	peptidoglycan editing factor PgeF	406.783	658.038	611.81	360.663	418.162	633.967	388.456	173.081	400.857	NITMOv2_0629	-	conserved protein of unknown function	450.202	156.946	4.6118	1.60773	2.20533	454	19.2738	-0.143239	0.403028	-0.84404	0.43074	-0.700801	0.446574	4.15565	0.125202	na	19.2738	-0.143239	0.403028	-0.355406	0.722286	na	19.2738	-0.84404	0.43074	-1.95951	0.0500528	na	19.2738	-0.987279	0.704634
NITMOv2_RS04185	NZ_CP011801	856902	857276	-	375	hypothetical protein	288.545	430.863	650.966	270.879	680.472	645.213	531.408	552.473	0	NITMOv2_0911	exbD	Biopolymer transport protein exbD	450.091	226.318	4.61066	2.31837	2.20497	455	9.01311	0.298882	0.628651	-0.438135	0.664621	-0.737017	0.67288	1.20325	0.54792	na	9.01311	0.298882	0.628651	0.475433	0.634478	na	9.01311	-0.438135	0.664621	-0.659226	0.509751	na	9.01311	-0.139254	1.10503
NITMOv2_RS14575	NZ_CP011801	2985686	2987059	-	1374	tetratricopeptide repeat protein	393.757	426.277	499.155	468.222	585.727	352.191	483.45	385.338	450.104	NITMOv2_3180	-	conserved exported protein of unknown function	449.358	70.4977	4.60315	0.722167	2.20262	456	33.173	0.207315	0.315224	-0.074675	0.32249	-0.28199	0.329302	0.807144	0.66793	0.926213	33.173	0.207315	0.315224	0.657673	0.510748	0.925151	33.173	-0.074675	0.32249	-0.231557	0.816882	0.939778	33.173	0.13264	0.546162
NITMOv2_RS09255	NZ_CP011801	1882957	1883178	-	222	hypothetical protein	433.25	727.81	575.983	152.522	265.257	396.323	299.216	518.462	672.429	NITMOv2_2009	-	conserved protein of unknown function	449.028	192.264	4.59977	1.96952	2.20156	457	5.24304	-1.00026	0.768825	-0.264884	0.707314	0.735377	0.807388	1.75727	0.41535	na	5.24304	-1.00026	0.768825	-1.30102	0.19325	na	5.24304	-0.264884	0.707314	-0.374493	0.708038	na	5.24304	-1.26514	1.23729
NITMOv2_RS15690	NZ_CP011801	3229175	3229672	+	498	hypothetical protein	458.697	324.445	210.079	407.95	197.078	574.19	578.005	647.141	642.337	NITMOv2_3420	-	conserved protein of unknown function	448.88	175.64	4.59826	1.79922	2.20109	458	11.8434	0.335461	0.532833	0.829465	0.513922	0.494004	0.523622	2.66317	0.264058	na	11.8434	0.335461	0.532833	0.629579	0.52897	na	11.8434	0.829465	0.513922	1.61399	0.10653	na	11.8434	1.16493	0.906573
NITMOv2_RS05945	NZ_CP011801	1205303	1205800	+	498	DUF1348 domain-containing protein	337.988	446.112	583.554	237.971	551.82	706.696	266.771	693.365	214.112	NITMOv2_1282	-	conserved protein of unknown function	448.71	193.663	4.59651	1.98385	2.20054	459	11.876	0.199571	0.52572	-0.317579	0.548491	-0.51715	0.559416	0.86108	0.650158	na	11.876	0.199571	0.52572	0.379615	0.704231	na	11.876	-0.317579	0.548491	-0.579004	0.562586	na	11.876	-0.118008	0.917335
NITMOv2_RS15010	NZ_CP011801	3084343	3085128	+	786	Crp/Fnr family transcriptional regulator	550.658	616.694	369.733	193.854	524.439	559.692	535.24	439.308	244.186	NITMOv2_3277	-	putative Transcriptional regulator, Crp/Fnr family	448.2	148.852	4.59129	1.52482	2.1989	460	18.7442	-0.178363	0.434145	-0.399849	0.442283	-0.221486	0.460378	0.817455	0.664495	na	18.7442	-0.178363	0.434145	-0.410838	0.681191	na	18.7442	-0.399849	0.442283	-0.904057	0.365965	na	18.7442	-0.578213	0.745818
NITMOv2_RS17160	NZ_CP011801	3525059	3526495	-	1437	glutamate synthase subunit beta	401.593	351.369	420.646	494.82	437.111	520.432	523.889	496.598	385.849	NITMOv2_3735	gltD	Glutamate synthase [NADPH] small chain	448.034	63.0278	4.58959	0.645647	2.19837	461	34.5031	0.402715	0.301581	0.170574	0.307358	-0.232141	0.310561	1.79829	0.406917	0.867735	34.5031	0.402715	0.301581	1.33535	0.181763	0.763156	34.5031	0.170574	0.307358	0.554969	0.578916	0.832844	34.5031	0.573289	0.523824
NITMOv2_RS06490	NZ_CP011801	1325030	1326463	+	1434	metalloprotease TldD	494.658	422.525	478.27	318.764	383.272	521.521	447.781	577.901	386.657	NITMOv2_1412	tldD	putative peptidase	447.928	79.5898	4.5885	0.815306	2.19802	462	34.1502	-0.111557	0.309803	-0.0747181	0.309086	0.0368391	0.322721	0.138966	0.932876	0.987751	34.1502	-0.111557	0.309803	-0.360091	0.718779	0.958372	34.1502	-0.0747181	0.309086	-0.241739	0.808983	0.939778	34.1502	-0.186275	0.528086
NITMOv2_RS20765	NZ_CP011801	4254073	4254318	-	246	sulfurtransferase TusA family protein	537.6	492.603	330.775	275.283	239.378	89.4143	630.057	655.033	780.205	NITMOv2_4517	-	putative Sulfurtransferase TusA	447.817	226.954	4.58736	2.32488	2.19766	463	5.78697	-1.00937	0.779236	0.536846	0.659703	1.54622	0.780513	4.1191	0.127511	na	5.78697	-1.00937	0.779236	-1.29534	0.195203	na	5.78697	0.536846	0.659703	0.813769	0.415778	na	5.78697	-0.472528	1.21476
NITMOv2_RS22265	NZ_CP011801	4583362	4583631	+	270	hypothetical protein	400.757	149.605	387.48	564.331	799.7	325.865	574.052	511.55	315.935	NITMOv2_4858	-	conserved protein of unknown function	447.697	188.562	4.58614	1.9316	2.19728	464	6.53854	0.905912	0.669947	0.43089	0.695472	-0.475021	0.678497	1.85609	0.395326	na	6.53854	0.905912	0.669947	1.35221	0.176307	na	6.53854	0.43089	0.695472	0.619565	0.535544	na	6.53854	1.3368	1.18518
NITMOv2_RS03940	NZ_CP011801	803540	804346	+	807	CDP-diacylglycerol--serine O-phosphatidyltransferase	387.348	500.538	273.685	419.577	462.145	490.615	411.562	342.301	739.922	NITMOv2_0857	pssA	CDP-diacylglycerol-serine O-phosphatidyltransferase	447.521	131.037	4.58434	1.34232	2.19671	465	19.3328	0.373782	0.417456	0.331245	0.419044	-0.0425371	0.424232	0.96424	0.617473	na	19.3328	0.373782	0.417456	0.89538	0.370584	na	19.3328	0.331245	0.419044	0.790477	0.429249	na	19.3328	0.705026	0.720945
NITMOv2_RS03905	NZ_CP011801	796054	797106	+	1053	cytochrome-c peroxidase	513.791	479.504	651.319	241.167	428.744	501.331	441.579	459.083	303.783	NITMOv2_0849	ccA1	Cytochrome c peroxidase	446.7	119.165	4.57592	1.2207	2.19406	466	25.0252	-0.420808	0.359989	-0.540914	0.364308	-0.120106	0.386098	2.60646	0.271652	0.761657	25.0252	-0.420808	0.359989	-1.16895	0.242424	0.817217	25.0252	-0.540914	0.364308	-1.48477	0.137604	0.563592	25.0252	-0.961722	0.612823
NITMOv2_RS06435	NZ_CP011801	1311342	1311671	-	330	hypothetical protein	182.162	61.2022	176.127	410.422	356.891	266.617	670.97	1116.11	775.476	NITMOv2_1400	-	conserved protein of unknown function	446.22	342.802	4.571	3.51161	2.19251	467	7.71673	1.33539	0.718965	2.43337	0.674671	1.09798	0.612218	14.1466	0.000847443	na	7.71673	1.33539	0.718965	1.85738	0.063257	na	7.71673	2.43337	0.674671	3.60675	0.000310055	na	7.71673	3.76876	1.25275
NITMOv2_RS16985	NZ_CP011801	3497466	3498794	-	1329	Tol-Pal system beta propeller repeat protein TolB	461.368	410.317	402.349	509.554	472.632	546.174	416.517	311.78	481.391	NITMOv2_3697	tolB	Protein TolB	445.787	69.2229	4.56657	0.709108	2.19111	468	31.9358	0.364017	0.31157	-0.147265	0.325129	-0.511282	0.328932	2.65657	0.264931	0.76066	31.9358	0.364017	0.31157	1.16833	0.242673	0.817217	31.9358	-0.147265	0.325129	-0.452944	0.650589	0.869711	31.9358	0.216752	0.54532
NITMOv2_RS05630	NZ_CP011801	1150090	1150761	+	672	30S ribosomal protein S3	286.255	330.601	328.666	554.254	408.938	360.052	560.14	753.622	412.549	NITMOv2_1212	rpsC	30S ribosomal subunit protein S3	443.897	150.757	4.54721	1.54433	2.18498	469	15.8901	0.618834	0.446265	0.788736	0.44095	0.169903	0.438983	3.49477	0.174229	na	15.8901	0.618834	0.446265	1.3867	0.165534	na	15.8901	0.788736	0.44095	1.78872	0.0736599	na	15.8901	1.40757	0.771021
NITMOv2_RS10245	NZ_CP011801	2077962	2078213	+	252	hypothetical protein	143.127	400.728	738.057	470.276	389.465	523.712	439.326	548.089	338.502	NITMOv2_2219	-	conserved membrane protein of unknown function	443.476	162.353	4.54289	1.66312	2.18361	470	5.95966	0.21304	0.705505	-0.0364663	0.721459	-0.249506	0.73835	0.138067	0.933295	na	5.95966	0.21304	0.705505	0.301968	0.762676	na	5.95966	-0.0364663	0.721459	-0.0505452	0.959688	na	5.95966	0.176574	1.2212
NITMOv2_RS16780	NZ_CP011801	3450456	3450950	-	495	hypothetical protein	412.901	652.823	352.254	444.624	198.273	488.798	402.582	604.559	430.82	NITMOv2_3652	-	conserved protein of unknown function	443.07	133.717	4.53874	1.36977	2.18229	471	11.6373	-0.177664	0.514905	-0.0213352	0.508085	0.156329	0.535605	0.136184	0.934175	na	11.6373	-0.177664	0.514905	-0.345042	0.730063	na	11.6373	-0.0213352	0.508085	-0.0419915	0.966505	na	11.6373	-0.198999	0.871597
NITMOv2_RS02910	NZ_CP011801	602662	603480	+	819	pyrroline-5-carboxylate reductase	469.751	271.262	553.543	372.086	575.209	402.855	405.531	562.142	364.54	NITMOv2_0631	proC	Pyrroline-5-carboxylate reductase	441.88	105.055	4.52655	1.07616	2.17841	472	19.3681	0.127196	0.405262	-0.0796726	0.412481	-0.206868	0.423711	0.24818	0.8833	na	19.3681	0.127196	0.405262	0.31386	0.753627	na	19.3681	-0.0796726	0.412481	-0.193155	0.846838	na	19.3681	0.0475231	0.699446
NITMOv2_RS01830	NZ_CP011801	379656	380528	+	873	4-hydroxy-tetrahydrodipicolinate synthase	426.923	508.966	492.672	368.463	382.237	403.132	456.536	474.634	439.703	NITMOv2_0406	dapA	4-hydroxy-tetrahydrodipicolinate synthase	439.252	48.7121	4.49963	0.498999	2.16981	473	20.4232	-0.19526	0.375023	-0.128198	0.372925	0.0670621	0.394181	0.288842	0.865523	na	20.4232	-0.19526	0.375023	-0.52066	0.602603	na	20.4232	-0.128198	0.372925	-0.343762	0.731025	na	20.4232	-0.323458	0.635652
NITMOv2_RS05635	NZ_CP011801	1150774	1151208	+	435	50S ribosomal protein L16	276.384	557.151	427.564	505.952	406.117	252.827	661.716	370.432	490.244	NITMOv2_1213	rplP	50S ribosomal subunit protein L16	438.71	131.191	4.49407	1.34389	2.16802	474	10.1947	0.0615135	0.548315	0.240898	0.540351	0.179384	0.560993	0.212039	0.899407	na	10.1947	0.0615135	0.548315	0.112186	0.910676	na	10.1947	0.240898	0.540351	0.445818	0.655729	na	10.1947	0.302411	0.93303
NITMOv2_RS18335	NZ_CP011801	3767849	3769222	-	1374	sigma-54-dependent Fis family transcriptional regulator	402.507	440.976	473.774	431.257	385.723	432.234	402.875	368.584	605.312	NITMOv2_3992	zraR	Transcriptional regulatory protein ZraR	438.138	70.1832	4.48822	0.718946	2.16614	475	32.2096	0.0335913	0.319298	-0.00239689	0.320462	-0.0359882	0.331384	0.0152294	0.992414	0.994035	32.2096	0.0335913	0.319298	0.105204	0.916214	0.980274	32.2096	-0.00239689	0.320462	-0.00747949	0.994032	0.994032	32.2096	0.0311944	0.547247
NITMOv2_RS09765	NZ_CP011801	1980218	1981489	+	1272	hypothetical protein	396.976	428.704	466.072	465.839	447.517	293.97	522.217	579.113	335.308	NITMOv2_2117	-	putative Phosphate-selective porin	437.302	87.8309	4.47965	0.899725	2.16339	476	29.6927	0.0286506	0.337129	0.0701232	0.336273	0.0414726	0.347852	0.0438431	0.978317	0.992864	29.6927	0.0286506	0.337129	0.0849842	0.932274	0.980459	29.6927	0.0701232	0.336273	0.208531	0.834814	0.948524	29.6927	0.0987738	0.576601
NITMOv2_RS20400	NZ_CP011801	4180612	4181670	-	1059	PhoH family protein	385.998	381.43	428.094	367.694	333.638	456.95	376.352	760.803	443.025	NITMOv2_4443	ybeZ	putative enzyme with nucleoside triphosphate hydrolase domain	437.109	127.582	4.47768	1.30693	2.16275	477	24.5154	0.0494077	0.367276	0.31059	0.359988	0.261182	0.373359	0.844506	0.655568	0.920639	24.5154	0.0494077	0.367276	0.134525	0.892988	0.980274	24.5154	0.31059	0.359988	0.862777	0.38826	0.746465	24.5154	0.359997	0.624155
NITMOv2_RS19720	NZ_CP011801	4043381	4044817	+	1437	ABC transporter permease	552.191	590.301	436.825	377.006	368.812	336.75	539.298	416.502	311.648	NITMOv2_4292	-	putative Efflux transporter, membrane fusion protein	436.592	101.036	4.47238	1.03499	2.16104	478	33.4705	-0.421214	0.31795	-0.385208	0.317201	0.0360065	0.336565	2.28103	0.319654	0.803418	33.4705	-0.421214	0.31795	-1.32478	0.185244	0.763156	33.4705	-0.385208	0.317201	-1.2144	0.224597	0.619675	33.4705	-0.806422	0.538648
NITMOv2_RS15720	NZ_CP011801	3234336	3235220	-	885	GTPase Era	407.549	387.96	367.777	478.247	443.593	447.374	500.385	442.187	433.741	NITMOv2_3426	era	membrane-associated, 16S rRNA-binding GTPase	434.313	41.6932	4.44903	0.427099	2.15349	479	20.6082	0.346147	0.373609	0.166531	0.37977	-0.179616	0.385766	0.860349	0.650396	na	20.6082	0.346147	0.373609	0.926495	0.354189	na	20.6082	0.166531	0.37977	0.438504	0.661021	na	20.6082	0.512677	0.647148
NITMOv2_RS10630	NZ_CP011801	2149672	2153202	-	3531	vitamin B12-dependent ribonucleotide reductase	350.705	480.466	385.175	407.546	500.315	448.515	476.577	469.391	380.491	NITMOv2_2304	nrdJ	Vitamin B12-dependent ribonucleotide reductase	433.242	53.283	4.43806	0.545822	2.14993	480	81.7956	0.279373	0.219406	0.0647469	0.222604	-0.214626	0.225841	1.76403	0.413949	0.867735	81.7956	0.279373	0.219406	1.27331	0.202906	0.802865	81.7956	0.0647469	0.222604	0.290862	0.771157	0.932403	81.7956	0.34412	0.379972
NITMOv2_RS12510	NZ_CP011801	2551424	2557723	-	6300	HAMP domain-containing protein	551.517	474.463	527.711	376.221	458.01	429.444	428.782	383.662	260.646	NITMOv2_2703	-	putative Signal transduction histidine kinase	432.273	87.1427	4.42813	0.892675	2.1467	481	146.022	-0.199561	0.197581	-0.618136	0.201963	-0.418575	0.206956	9.51931	0.00856858	0.134107	146.022	-0.199561	0.197581	-1.01002	0.312487	0.861737	146.022	-0.618136	0.201963	-3.06064	0.00220862	0.0708599	146.022	-0.817696	0.341795
NITMOv2_RS05895	NZ_CP011801	1195329	1196705	+	1377	nitrate ABC transporter substrate-binding protein	515.134	645.356	312.348	454.907	342.118	511.161	466.317	401.215	232.305	NITMOv2_1271	-	putative nitrate ABC transporter, nitrate binding protein NrtA	431.207	124.306	4.41721	1.27337	2.14314	482	31.8099	-0.0418781	0.346454	-0.478112	0.357967	-0.436234	0.36835	2.06361	0.356363	0.825633	31.8099	-0.0418781	0.346454	-0.120876	0.903789	0.980274	31.8099	-0.478112	0.357967	-1.33563	0.181669	0.599556	31.8099	-0.519991	0.60055
NITMOv2_RS18540	NZ_CP011801	3813191	3814657	-	1467	sigma-54-dependent Fis family transcriptional regulator	524.508	385.486	594.294	392.377	347.89	434.82	437.709	470.751	290.738	NITMOv2_4035	-	Sigma54 dependent transcriptional regulator	430.952	91.6464	4.41461	0.938811	2.14229	483	33.7848	-0.271877	0.315187	-0.429832	0.31972	-0.157955	0.33528	1.94453	0.378226	0.85512	33.7848	-0.271877	0.315187	-0.86259	0.388363	0.890951	33.7848	-0.429832	0.31972	-1.3444	0.178818	0.599556	33.7848	-0.701709	0.53918
NITMOv2_RS07960	NZ_CP011801	1622318	1622830	-	513	MogA/MoaB family molybdenum cofactor biosynthesis protein	328.105	590.547	362.554	330.018	191.316	514.524	388.456	538.473	623.556	NITMOv2_1738	moaB	Molybdenum cofactor biosynthesis protein B	429.728	143.95	4.40206	1.4746	2.13818	484	11.6499	-0.175721	0.522535	0.244542	0.503958	0.420263	0.533507	0.638115	0.726834	na	11.6499	-0.175721	0.522535	-0.336286	0.736655	na	11.6499	0.244542	0.503958	0.485243	0.627504	na	11.6499	0.0688214	0.877156
NITMOv2_RS11605	NZ_CP011801	2345639	2346442	+	804	BON domain-containing protein	373.84	226.083	477.121	421.142	390.627	300.939	605.876	486.736	583.536	NITMOv2_2512	-	conserved exported protein of unknown function	429.544	123.978	4.40018	1.27001	2.13756	485	18.4086	0.128493	0.422818	0.525083	0.410206	0.396591	0.423997	1.78046	0.410562	na	18.4086	0.128493	0.422818	0.303896	0.761208	na	18.4086	0.525083	0.410206	1.28005	0.200528	na	18.4086	0.653576	0.717158
NITMOv2_RS02380	NZ_CP011801	491983	493530	+	1548	cytochrome P450	473.763	378.362	428.03	437.466	456.489	241.557	472.02	342.024	633.706	NITMOv2_0520	-	putative Cytochrome P450	429.269	107.151	4.39736	1.09764	2.13664	486	35.6181	-0.0553489	0.336224	0.101729	0.33292	0.157078	0.34437	0.217353	0.897021	0.976292	35.6181	-0.0553489	0.336224	-0.164619	0.869244	0.980274	35.6181	0.101729	0.33292	0.305567	0.759934	0.924555	35.6181	0.0463804	0.573737
NITMOv2_RS16890	NZ_CP011801	3474951	3476249	-	1299	molybdopterin molybdenumtransferase MoeA	509.044	481.985	590.616	260.661	392.882	389.458	443.181	443.028	344.756	NITMOv2_3676	moeA	Molybdopterin biosynthesis protein MoeA	428.401	96.1977	4.38847	0.985434	2.13372	487	29.5975	-0.51665	0.326418	-0.448061	0.324559	0.068589	0.347981	3.18118	0.203805	0.699872	29.5975	-0.51665	0.326418	-1.58279	0.11347	0.672526	29.5975	-0.448061	0.324559	-1.38052	0.167425	0.59344	29.5975	-0.964711	0.550167
NITMOv2_RS11545	NZ_CP011801	2327172	2327396	+	225	hypothetical protein	213.737	897.632	206.656	225.732	348.96	293.279	688.863	409.24	568.683	NITMOv2_2499	-	protein of unknown function	428.087	242.115	4.38525	2.48019	2.13266	488	5.06607	-0.384695	0.814725	0.390866	0.760317	0.775561	0.823308	0.911659	0.633922	na	5.06607	-0.384695	0.814725	-0.472178	0.6368	na	5.06607	0.390866	0.760317	0.514084	0.607193	na	5.06607	0.00617162	1.34383
NITMOv2_RS14630	NZ_CP011801	2999270	2999773	-	504	hypothetical protein	572.509	641.166	530.478	268.729	77.8929	480.069	658.989	365.393	253.876	NITMOv2_3192	-	conserved protein of unknown function	427.678	198.454	4.38106	2.03293	2.13128	489	11.4001	-0.989693	0.556477	-0.516129	0.531512	0.473563	0.589294	3.29344	0.19268	na	11.4001	-0.989693	0.556477	-1.7785	0.0753225	na	11.4001	-0.516129	0.531512	-0.971059	0.331519	na	11.4001	-1.50582	0.914919
NITMOv2_RS17705	NZ_CP011801	3635072	3635515	-	444	CBS domain-containing protein	433.25	545.857	340.354	495.696	221.047	544.944	349.086	725.847	192.123	NITMOv2_3859	-	conserved protein of unknown function	427.578	170.757	4.38004	1.74921	2.13094	490	10.1029	0.0661687	0.559692	-0.132327	0.569567	-0.198496	0.587476	0.118411	0.942513	na	10.1029	0.0661687	0.559692	0.118223	0.905891	na	10.1029	-0.132327	0.569567	-0.232329	0.816282	na	10.1029	-0.0661584	0.964466
NITMOv2_RS09840	NZ_CP011801	1992493	1992717	+	225	hypothetical protein	267.171	0	309.984	451.465	436.2	195.519	492.045	1023.1	663.463	NITMOv2_2133	-	conserved protein of unknown function	426.55	293.962	4.3695	3.0113	2.12747	491	5.0689	0.906018	0.837933	1.68947	0.796796	0.783453	0.769734	4.6622	0.0971888	na	5.0689	0.906018	0.837933	1.08125	0.279584	na	5.0689	1.68947	0.796796	2.12033	0.0339782	na	5.0689	2.59549	1.44275
NITMOv2_RS17350	NZ_CP011801	3573282	3574424	-	1143	alanine--glyoxylate aminotransferase family protein	483.853	353.398	386.463	488.791	463.677	365.636	309.95	624.332	354.494	NITMOv2_3777	sgaA	Serine-glyoxylate transaminase	425.622	98.1723	4.36	1.00566	2.12433	492	26.0747	0.212007	0.358153	-0.0278643	0.365063	-0.239872	0.372673	0.514224	0.773281	0.932721	26.0747	0.212007	0.358153	0.591947	0.553886	0.925151	26.0747	-0.0278643	0.365063	-0.0763273	0.939159	0.986747	26.0747	0.184143	0.619842
NITMOv2_RS09560	NZ_CP011801	1937270	1938610	-	1341	acetyl-CoA carboxylase biotin carboxylase subunit	466.205	301.219	416.086	302.996	336.665	360.858	495.347	703.81	445.277	NITMOv2_2072	accC	acetyl-CoA carboxylase, biotin carboxylase subunit	425.385	125.993	4.35757	1.29066	2.12352	493	30.1733	-0.166672	0.339271	0.365083	0.325468	0.531755	0.343249	2.5947	0.273255	0.761657	30.1733	-0.166672	0.339271	-0.491266	0.623238	0.935905	30.1733	0.365083	0.325468	1.12172	0.261983	0.639083	30.1733	0.198411	0.569428
NITMOv2_RS20290	NZ_CP011801	4156382	4156660	+	279	ImmA/IrrE family metallo-endopeptidase	387.829	289.559	458.309	849.53	562.839	157.677	396.81	330.032	382.179	NITMOv2_4414	-	conserved protein of unknown function	423.863	194.666	4.34198	1.99413	2.11835	494	6.46027	0.601908	0.67261	-0.133555	0.715765	-0.735463	0.713914	1.30122	0.521727	na	6.46027	0.601908	0.67261	0.894884	0.370849	na	6.46027	-0.133555	0.715765	-0.186591	0.851981	na	6.46027	0.468353	1.19154
NITMOv2_RS16615	NZ_CP011801	3409735	3411033	-	1299	hypothetical protein	370.214	326.506	438.487	430.091	392.882	237.061	528.408	549.355	541.759	NITMOv2_3614	-	putative Pentaheme cytochrome c	423.863	105.5	4.34198	1.08072	2.11835	495	29.3159	0.0185392	0.343057	0.422768	0.332846	0.404228	0.346051	2.02054	0.364121	0.835337	29.3159	0.0185392	0.343057	0.0540411	0.956902	0.983707	29.3159	0.422768	0.332846	1.27016	0.204028	0.606291	29.3159	0.441307	0.580688
NITMOv2_RS00515	NZ_CP011801	119352	119816	-	465	transcriptional repressor NrdR	491.25	434.338	449.976	546.127	422.129	378.424	285.703	346.534	458.615	NITMOv2_0124	nrdR	Transcriptional repressor NrdR	423.677	77.9616	4.34008	0.798626	2.11772	496	10.6293	0.0881222	0.503858	-0.412235	0.529932	-0.500357	0.546367	0.949379	0.622078	na	10.6293	0.0881222	0.503858	0.174895	0.861162	na	10.6293	-0.412235	0.529932	-0.777901	0.436627	na	10.6293	-0.324113	0.878001
NITMOv2_RS05645	NZ_CP011801	1151442	1151705	+	264	30S ribosomal protein S17	409.865	535.519	528.381	192.386	743.523	249.954	83.8713	261.588	807.788	NITMOv2_1215	rpsQ	30S ribosomal subunit protein S17	423.653	249.73	4.33983	2.5582	2.11764	497	5.99002	-0.206306	0.743263	-0.399216	0.756269	-0.192911	0.79056	0.283428	0.86787	na	5.99002	-0.206306	0.743263	-0.277567	0.781344	na	5.99002	-0.399216	0.756269	-0.527876	0.597585	na	5.99002	-0.605522	1.27428
NITMOv2_RS12435	NZ_CP011801	2536908	2537291	-	384	STAS domain-containing protein	344.4	788.934	454.078	132.265	255.586	229.124	922.584	239.789	444.283	NITMOv2_2686	rsbS	antagonist of RsbT	423.449	268.047	4.33775	2.74583	2.11695	498	8.53987	-1.23071	0.673485	0.00123614	0.595641	1.23194	0.690944	4.11223	0.12795	na	8.53987	-1.23071	0.673485	-1.82737	0.0676437	na	8.53987	0.00123614	0.595641	0.00207531	0.998344	na	8.53987	-1.22947	1.0674
NITMOv2_RS19970	NZ_CP011801	4088321	4088746	-	426	rubrerythrin	225.778	521.511	327.448	596.124	368.62	567.969	415.813	432.295	350.421	NITMOv2_4341	rbr	Rubrerythrin	422.887	120.976	4.33198	1.23926	2.11503	499	9.68365	0.683187	0.542456	0.137083	0.568467	-0.546104	0.56374	1.77842	0.410981	na	9.68365	0.683187	0.542456	1.25943	0.207874	na	9.68365	0.137083	0.568467	0.241145	0.809443	na	9.68365	0.82027	0.957613
NITMOv2_RS19180	NZ_CP011801	3941170	3942726	-	1557	ribonuclease Y	370.642	311.317	283.704	500.178	428.636	423.813	497.733	561.817	424.594	NITMOv2_4170	rny	Ribonuclease Y	422.493	90.4587	4.32795	0.926644	2.11368	500	35.2142	0.596641	0.30736	0.53464	0.308918	-0.0620011	0.308129	4.51372	0.104679	0.633815	35.2142	0.596641	0.30736	1.94118	0.0522367	0.575837	35.2142	0.53464	0.308918	1.73069	0.0835077	0.486955	35.2142	1.13128	0.533721
NITMOv2_RS20525	NZ_CP011801	4204740	4205960	-	1221	hypothetical protein	433.25	529.316	637.866	332.775	273.295	378.308	544.03	282.798	384.245	NITMOv2_4466	apgM	putative 2,3-bisphosphoglycerate-independent phosphoglycerate mutase	421.765	125.458	4.32049	1.28517	2.1112	501	27.4329	-0.595576	0.353548	-0.469461	0.349826	0.126115	0.375252	3.37863	0.184646	0.681664	27.4329	-0.595576	0.353548	-1.68457	0.0920718	0.590269	27.4329	-0.469461	0.349826	-1.34198	0.179601	0.599556	27.4329	-1.06504	0.594924
NITMOv2_RS00800	NZ_CP011801	184639	185058	-	420	hypothetical protein	171.753	288.525	304.448	241.856	467.357	314.227	527.191	767.324	710.853	NITMOv2_0186	-	conserved exported protein of unknown function	421.504	210.395	4.31782	2.15526	2.1103	502	9.30759	0.535522	0.596075	1.33117	0.561779	0.795647	0.563671	5.86889	0.0531602	na	9.30759	0.535522	0.596075	0.898413	0.368965	na	9.30759	1.33117	0.561779	2.36956	0.0178093	na	9.30759	1.86669	1.01197
NITMOv2_RS05230	NZ_CP011801	1067111	1067746	+	636	hypothetical protein	245.747	476.338	402.102	452.529	401.222	449.602	382.959	579.113	402.37	NITMOv2_1129	-	conserved exported protein of unknown function	421.331	88.8321	4.31605	0.909982	2.10971	503	14.287	0.356732	0.453994	0.230416	0.459235	-0.126315	0.466163	0.64016	0.726091	na	14.287	0.356732	0.453994	0.785762	0.432007	na	14.287	0.230416	0.459235	0.50174	0.615851	na	14.287	0.587148	0.785307
NITMOv2_RS09570	NZ_CP011801	1939344	1939904	-	561	elongation factor P	235.739	144.005	497.3	331.959	244.925	313.667	592.033	861.701	570.203	NITMOv2_2074	efp	Elongation factor P	421.281	227.225	4.31554	2.32766	2.10954	504	12.4071	0.0771438	0.541245	1.06514	0.503324	0.987998	0.525591	5.69885	0.0578775	na	12.4071	0.0771438	0.541245	0.14253	0.886661	na	12.4071	1.06514	0.503324	2.11622	0.0343265	na	12.4071	1.14229	0.903502
NITMOv2_RS01600	NZ_CP011801	339663	340334	+	672	(d)CMP kinase	554.619	390.71	570.841	428.287	321.308	425.516	461.292	479.578	158.673	NITMOv2_0357	cmk	cytidylate kinase	421.203	125.053	4.31473	1.28102	2.10927	505	15.1506	-0.279047	0.451333	-0.574258	0.464412	-0.29521	0.487866	1.57362	0.455295	na	15.1506	-0.279047	0.451333	-0.618274	0.536395	na	15.1506	-0.574258	0.464412	-1.23653	0.216263	na	15.1506	-0.853305	0.775079
NITMOv2_RS03025	NZ_CP011801	623339	623524	+	186	50S ribosomal protein L32	193.914	434.338	624.967	91.0211	316.597	946.061	595.216	123.762	458.615	NITMOv2_0655	rpmF	50S ribosomal protein L32	420.499	275.893	4.30752	2.82621	2.10686	506	4.15037	0.149007	0.877643	-0.138878	0.899401	-0.287884	0.922201	0.0979222	0.952218	na	4.15037	0.149007	0.877643	0.16978	0.865183	na	4.15037	-0.138878	0.899401	-0.154411	0.877286	na	4.15037	0.0101291	1.51918
NITMOv2_RS22475	NZ_CP011801	1076286	1076837	+	552	hypothetical protein	457.385	292.706	400.115	552.063	355.598	318.781	361.011	542.131	502.233	NITMOv2_1143	dksA	DnaK suppressor protein (Modular protein)	420.225	96.8167	4.30472	0.991775	2.10592	507	12.4423	0.198653	0.489339	0.182844	0.490385	-0.0158097	0.5034	0.20814	0.901162	na	12.4423	0.198653	0.489339	0.405962	0.68477	na	12.4423	0.182844	0.490385	0.372858	0.709254	na	12.4423	0.381497	0.840505
NITMOv2_RS19870	NZ_CP011801	4068269	4068979	+	711	Fe-S protein assembly co-chaperone HscB	456.558	511.309	326.987	642.909	220.861	278.429	435.989	453.272	449.907	NITMOv2_4322	hscB	Co-chaperone protein HscB (Hsc20)	419.58	127.46	4.29811	1.30568	2.1037	508	16.0099	-0.0135142	0.463119	-0.0101918	0.463324	0.00332241	0.479935	0.00100307	0.999499	na	16.0099	-0.0135142	0.463119	-0.0291807	0.97672	na	16.0099	-0.0101918	0.463324	-0.021997	0.98245	na	16.0099	-0.0237059	0.792439
NITMOv2_RS05085	NZ_CP011801	1039206	1039409	+	204	hypothetical protein	412.544	396.014	398.876	248.97	577.324	539.115	434.157	451.367	313.612	NITMOv2_1101	-	conserved protein of unknown function	419.109	101.096	4.29328	1.03561	2.10208	509	4.56662	0.25304	0.757082	-0.0936482	0.783924	-0.346688	0.801881	0.206165	0.902053	na	4.56662	0.25304	0.757082	0.334231	0.738205	na	4.56662	-0.0936482	0.783924	-0.119461	0.90491	na	4.56662	0.159392	1.31621
NITMOv2_RS20540	NZ_CP011801	4208341	4209537	-	1197	alanine transaminase	381.673	472.438	388.451	325.304	393.564	404.269	647.427	384.624	374.133	NITMOv2_4469	yfdZ	putative aminotransferase, PLP-dependent	419.098	93.6743	4.29317	0.959584	2.10204	510	26.7064	-0.0316571	0.350447	0.119804	0.346379	0.151462	0.360651	0.201652	0.90409	0.977169	26.7064	-0.0316571	0.350447	-0.0903336	0.928022	0.980274	26.7064	0.119804	0.346379	0.345876	0.729436	0.913993	26.7064	0.0881473	0.596249
NITMOv2_RS12440	NZ_CP011801	2537425	2538279	-	855	STAS domain-containing protein	590.589	354.328	448.661	574.231	505.074	308.715	284.868	350.008	349.191	NITMOv2_2687	-	putative RsbT co-antagonist protein rsbRA	418.407	114.997	4.2861	1.17801	2.09966	511	19.3924	0.100902	0.399907	-0.602743	0.425774	-0.703644	0.436215	2.9921	0.224013	na	19.3924	0.100902	0.399907	0.252313	0.800799	na	19.3924	-0.602743	0.425774	-1.41564	0.156881	na	19.3924	-0.501841	0.701523
NITMOv2_RS10890	NZ_CP011801	2198276	2198866	-	591	XTP/dITP diphosphatase	508.574	478.433	432.719	429.694	531.411	260.527	262.257	350.554	505.175	NITMOv2_2362	-	Non-canonical purine NTP pyrophosphatase	417.705	103.846	4.2789	1.06379	2.09724	512	13.2813	-0.0917501	0.469565	-0.41414	0.484518	-0.32239	0.504684	0.778786	0.677468	na	13.2813	-0.0917501	0.469565	-0.195394	0.845085	na	13.2813	-0.41414	0.484518	-0.854747	0.392691	na	13.2813	-0.50589	0.809809
NITMOv2_RS11250	NZ_CP011801	2260836	2261198	+	363	response regulator	298.083	222.553	256.185	233.195	432.595	424.164	365.984	697.568	822.475	NITMOv2_2436	-	Response regulator, CheY like	416.978	211.43	4.27145	2.16586	2.09473	513	7.98842	0.551621	0.636429	1.1845	0.60719	0.63288	0.60811	3.88632	0.143251	na	7.98842	0.551621	0.636429	0.866744	0.386082	na	7.98842	1.1845	0.60719	1.95079	0.0510818	na	7.98842	1.73612	1.08519
NITMOv2_RS01050	NZ_CP011801	232569	233672	-	1104	glycine cleavage system aminomethyltransferase GcvT	348.484	439.059	410.644	475.387	533.397	298.857	441.236	333.619	463.6	NITMOv2_0237	gcvT	Aminomethyltransferase, glycine cleavage system T protein	416.032	75.6962	4.26176	0.77542	2.09145	514	24.7044	0.261394	0.359077	-0.0107173	0.367259	-0.272111	0.37415	0.710256	0.701084	0.929113	24.7044	0.261394	0.359077	0.727962	0.466637	0.925151	24.7044	-0.0107173	0.367259	-0.0291819	0.97672	0.994032	24.7044	0.250677	0.62261
NITMOv2_RS10585	NZ_CP011801	2140397	2141416	-	1020	anthranilate phosphoribosyltransferase	412.544	396.014	353.29	348.557	384.883	388.163	520.989	519.072	418.149	NITMOv2_2295	trpD	Anthranilate phosphoribosyltransferase	415.74	63.5277	4.25877	0.650767	2.09044	515	22.5614	0.0546927	0.364212	0.250845	0.358272	0.196152	0.37255	0.532419	0.766278	0.9321	22.5614	0.0546927	0.364212	0.150167	0.880633	0.980274	22.5614	0.250845	0.358272	0.700151	0.483833	na	22.5614	0.305537	0.619052
NITMOv2_RS03060	NZ_CP011801	629221	629928	+	708	ribonuclease III	781.136	199.685	410.466	334.773	554.492	341.744	218.918	325.137	572.297	NITMOv2_0662	rnc	Ribonuclease 3	415.405	188.07	4.25535	1.92656	2.08928	516	15.8699	-0.121025	0.501225	-0.434546	0.512664	-0.31352	0.529163	0.757553	0.684699	na	15.8699	-0.121025	0.501225	-0.241459	0.8092	na	15.8699	-0.434546	0.512664	-0.847622	0.396648	na	15.8699	-0.555571	0.864922
NITMOv2_RS12500	NZ_CP011801	2548168	2550309	-	2142	PAS domain S-box protein	398.511	367.727	651.226	316.152	412.374	759.896	361.798	300.911	169.251	NITMOv2_2701	-	putative Histidine kinase family	415.316	181.411	4.25443	1.85834	2.08897	517	47.7671	0.13732	0.328537	-0.860068	0.347808	-0.997389	0.352333	8.95213	0.0113781	0.161362	47.7671	0.13732	0.328537	0.417975	0.675965	0.953323	47.7671	-0.860068	0.347808	-2.47283	0.0134049	0.202878	47.7671	-0.722748	0.577646
NITMOv2_RS19230	NZ_CP011801	3951984	3952733	-	750	F0F1 ATP synthase subunit A	368.696	403.934	433.977	474.038	209.376	469.246	442.84	675.245	255.907	NITMOv2_4181	atpB	ATP synthase F0, subunit A	414.807	134.698	4.24921	1.37983	2.0872	518	16.5378	0.0469853	0.449659	0.0972965	0.448198	0.0503112	0.463346	0.0471359	0.976708	na	16.5378	0.0469853	0.449659	0.104491	0.91678	na	16.5378	0.0972965	0.448198	0.217084	0.828143	na	16.5378	0.144282	0.769063
NITMOv2_RS02470	NZ_CP011801	511762	514425	-	2664	NADH dehydrogenase (quinone) subunit G	347.503	606.508	475.623	374.95	309.466	305.499	390.644	440.693	480.306	NITMOv2_0538	nuoG	NADH-quinone oxidoreductase, subunit G	414.577	96.9245	4.24686	0.992879	2.0864	519	58.7106	-0.387969	0.264957	-0.173925	0.261128	0.214044	0.274658	2.14539	0.342085	0.816061	58.7106	-0.387969	0.264957	-1.46427	0.14312	0.677738	58.7106	-0.173925	0.261128	-0.666054	0.505376	0.794002	58.7106	-0.561894	0.448712
NITMOv2_RS18270	NZ_CP011801	3751136	3752383	-	1248	NAD(P)/FAD-dependent oxidoreductase	452.778	501.681	372.577	447.666	707.777	246.749	319.356	387.351	290.493	NITMOv2_3979	sqr	Sulfidequinone oxidoreductase	414.048	137.496	4.24144	1.40848	2.08455	520	27.8997	0.213041	0.36313	-0.481562	0.382362	-0.694603	0.388534	3.29458	0.192571	0.682751	27.8997	0.213041	0.36313	0.58668	0.557419	0.925151	27.8997	-0.481562	0.382362	-1.25944	0.207871	0.606291	27.8997	-0.268521	0.636529
NITMOv2_RS16650	NZ_CP011801	3416227	3417354	-	1128	hypothetical protein	405.02	465.527	412.213	300.176	556.851	350.999	431.848	367.336	434.83	NITMOv2_3621	-	conserved membrane protein of unknown function	413.867	73.3147	4.23958	0.751023	2.08392	521	24.9628	0.0236386	0.354404	-0.11889	0.359024	-0.142529	0.371573	0.169748	0.918628	0.980355	24.9628	0.0236386	0.354404	0.0666996	0.946821	0.980864	24.9628	-0.11889	0.359024	-0.331148	0.740533	0.916999	24.9628	-0.0952515	0.609044
NITMOv2_RS11075	NZ_CP011801	2230239	2230478	+	240	(Fe-S)-binding protein	651.23	336.612	629.655	211.624	245.363	183.299	369.034	383.662	710.853	NITMOv2_2401	-	conserved protein of unknown function	413.481	200.765	4.23563	2.0566	2.08258	522	5.25904	-1.26018	0.789367	-0.247641	0.70171	1.01254	0.824091	2.77912	0.249185	na	5.25904	-1.26018	0.789367	-1.59645	0.110389	na	5.25904	-0.247641	0.70171	-0.352911	0.724155	na	5.25904	-1.50782	1.24574
NITMOv2_RS09600	NZ_CP011801	1943575	1944471	-	897	YicC family protein	402.097	360.254	375.816	301.983	612.723	269.738	320.899	718.565	356.615	NITMOv2_2080	-	conserved protein of unknown function	413.188	150.853	4.23263	1.54531	2.08155	523	19.7189	0.160795	0.426002	0.198636	0.425116	0.0378418	0.435635	0.249035	0.882923	na	19.7189	0.160795	0.426002	0.37745	0.705839	na	19.7189	0.198636	0.425116	0.467252	0.640319	na	19.7189	0.359431	0.73118
NITMOv2_RS17955	NZ_CP011801	3699011	3699586	-	576	DUF2238 domain-containing protein	271.346	350.637	343.081	146.961	374.86	572.81	653.497	439.613	555.354	NITMOv2_3911	-	conserved membrane protein of unknown function	412.018	160.241	4.22064	1.64148	2.07746	524	12.5244	0.249199	0.51643	0.712848	0.498791	0.463649	0.511529	2.12487	0.345614	na	12.5244	0.249199	0.51643	0.482541	0.629421	na	12.5244	0.712848	0.498791	1.42915	0.152961	na	12.5244	0.962047	0.877111
NITMOv2_RS00020	NZ_CP011801	5285	7759	+	2475	DNA gyrase subunit A	432.331	440.656	535.427	383.061	428.269	355.489	393.636	465.045	267.109	NITMOv2_0004	gyrA	DNA gyrase (type II topoisomerase), subunit A	411.225	74.9194	4.21252	0.767463	2.07468	525	54.4249	-0.164367	0.260332	-0.41085	0.265464	-0.246483	0.275518	2.42092	0.29806	0.783054	54.4249	-0.164367	0.260332	-0.631375	0.527795	0.925151	54.4249	-0.41085	0.265464	-1.54767	0.121702	0.539549	54.4249	-0.575217	0.447858
NITMOv2_RS11825	NZ_CP011801	2397925	2400843	-	2919	PAS domain S-box protein	444.828	422.062	533.631	394.394	396.749	519.944	439.958	252.357	292.232	NITMOv2_2557	-	protein of unknown function	410.684	92.7118	4.20698	0.949725	2.07278	526	64.4489	-0.00345483	0.251488	-0.585533	0.261949	-0.582078	0.2683	6.21166	0.0447874	0.409565	64.4489	-0.00345483	0.251488	-0.0137376	0.989039	0.993309	64.4489	-0.585533	0.261949	-2.23529	0.0253982	0.305572	64.4489	-0.588987	0.437883
NITMOv2_RS07315	NZ_CP011801	1489626	1490882	+	1257	bifunctional cobalt-precorrin-7 (C(5))-methyltransferase/cobalt-precorrin-6B (C(15))-methyltransferase	411.278	369.55	453.139	444.461	327.931	244.982	598.909	421.204	424.137	NITMOv2_1596	cobL	Precorrin-6Y C(5,15)-methyltransferase (Decarboxylating)	410.621	96.6055	4.20634	0.989612	2.07256	527	27.5521	-0.154131	0.354605	0.143553	0.346599	0.297684	0.363511	0.674329	0.713791	0.930513	27.5521	-0.154131	0.354605	-0.434656	0.663812	0.953323	27.5521	0.143553	0.346599	0.414177	0.678745	0.883669	27.5521	-0.0105781	0.599676
NITMOv2_RS19855	NZ_CP011801	4066169	4067386	+	1218	IscS subfamily cysteine desulfurase	335.609	431.129	286.315	347.494	273.968	361.181	672.623	548.089	437.718	NITMOv2_4319	iscS	cysteine desulfurase (tRNA sulfurtransferase), PLP-dependent	410.458	129.846	4.20467	1.33012	2.07199	528	26.4489	0.0335247	0.359237	0.603157	0.343815	0.569632	0.358447	3.84605	0.146164	0.681664	26.4489	0.0335247	0.359237	0.0933219	0.925648	0.980274	26.4489	0.603157	0.343815	1.75431	0.0793782	0.47751	26.4489	0.636682	0.605009
NITMOv2_RS16600	NZ_CP011801	3405669	3407726	-	2058	sodium-translocating pyrophosphatase	449.829	363.109	344.552	468.905	476.895	331.328	376.565	425.048	455.941	NITMOv2_3611	hppA	K(+)-insensitive pyrophosphate-energized proton pump	410.241	56.6314	4.20245	0.580123	2.07123	529	45.377	0.255405	0.282418	0.0377419	0.286958	-0.217663	0.29186	0.937634	0.625742	0.917781	45.377	0.255405	0.282418	0.904349	0.36581	0.890601	45.377	0.0377419	0.286958	0.131524	0.895361	0.971025	45.377	0.293146	0.488904
NITMOv2_RS20880	NZ_CP011801	4290697	4291287	-	591	hypothetical protein	325.488	273.39	472.057	401.047	232.493	669.926	449.584	389.505	469.091	NITMOv2_4542	-	conserved exported protein of unknown function	409.176	129.556	4.19153	1.32715	2.06748	530	12.9159	0.343291	0.490453	0.19143	0.496811	-0.151861	0.504179	0.494437	0.78097	na	12.9159	0.343291	0.490453	0.699946	0.483961	na	12.9159	0.19143	0.496811	0.385317	0.700002	na	12.9159	0.53472	0.848842
NITMOv2_RS11480	NZ_CP011801	2314259	2314831	-	573	Holliday junction resolvase RuvX	440.622	317.226	568.033	413.646	411.079	307.098	463.707	602.611	148.87	NITMOv2_2486	yqgF	putative Holliday junction resolvase	408.099	138.412	4.1805	1.41787	2.06368	531	12.4856	-0.134516	0.506252	-0.246009	0.511534	-0.111493	0.533903	0.243636	0.88531	na	12.4856	-0.134516	0.506252	-0.265709	0.790463	na	12.4856	-0.246009	0.511534	-0.480923	0.630571	na	12.4856	-0.380525	0.866525
NITMOv2_RS16335	NZ_CP011801	3359672	3359932	-	261	thiamine biosynthesis protein ThiS	737.024	1083.35	445.379	129.731	75.2069	252.827	84.8353	617.387	245.122	NITMOv2_3556	-	Thiamine biosynthesis protein ThiS (modular protein)	407.873	345.112	4.17819	3.53528	2.06288	532	5.57926	-2.20255	0.851572	-1.32468	0.75427	0.877877	0.929082	8.15141	0.0169802	na	5.57926	-2.20255	0.851572	-2.58646	0.00969684	na	5.57926	-1.32468	0.75427	-1.75624	0.0790478	na	5.57926	-3.52723	1.31339
NITMOv2_RS05640	NZ_CP011801	1151227	1151439	+	213	50S ribosomal protein L29	564.446	568.922	436.597	79.4832	460.775	103.267	415.813	540.369	500.601	NITMOv2_1214	rpmC	50S ribosomal protein L29	407.808	187.389	4.17752	1.91958	2.06265	533	4.57386	-1.18426	0.848944	-0.177729	0.756777	1.00654	0.883456	2.14396	0.34233	na	4.57386	-1.18426	0.848944	-1.39499	0.16302	na	4.57386	-0.177729	0.756777	-0.234849	0.814326	na	4.57386	-1.36199	1.344
NITMOv2_RS11095	NZ_CP011801	2232380	2232562	-	183	hypothetical protein	788.374	220.729	254.085	462.566	107.262	600.981	362.984	628.954	233.067	NITMOv2_2405	-	conserved protein of unknown function	406.556	227.908	4.16469	2.33465	2.05821	534	3.98	-0.0667944	0.874042	-0.192023	0.884567	-0.125229	0.921331	0.0500877	0.975267	na	3.98	-0.0667944	0.874042	-0.0764201	0.939085	na	3.98	-0.192023	0.884567	-0.217082	0.828145	na	3.98	-0.258818	1.49799
NITMOv2_RS09245	NZ_CP011801	1881804	1882274	-	471	Hsp20/alpha crystallin family protein	510.518	343.044	444.244	323.502	583.453	233.502	329.075	342.119	543.327	NITMOv2_2007	-	putative Molecular chaperone	405.865	118.984	4.15761	1.21885	2.05576	535	10.2612	-0.0935426	0.538754	-0.186367	0.543812	-0.0928247	0.568151	0.12262	0.940532	na	10.2612	-0.0935426	0.538754	-0.173628	0.862158	na	10.2612	-0.186367	0.543812	-0.342706	0.73182	na	10.2612	-0.27991	0.921509
NITMOv2_RS10895	NZ_CP011801	2198875	2199600	-	726	ribonuclease PH	298.083	361.649	464.335	303.153	270.372	484.758	762.466	317.076	381.863	NITMOv2_2363	rph	Ribonuclease PH	404.862	153.19	4.14734	1.56926	2.05219	536	15.6102	-0.00104667	0.46758	0.307136	0.456801	0.308183	0.475091	0.586481	0.745843	na	15.6102	-0.00104667	0.46758	-0.00223849	0.998214	na	15.6102	0.307136	0.456801	0.672363	0.501353	na	15.6102	0.306089	0.793023
NITMOv2_RS00010	NZ_CP011801	1572	2699	+	1128	DNA polymerase III subunit beta	575.555	447.622	401.907	405.238	435.04	292.499	314.071	469.374	283.585	NITMOv2_0002	dnaN	DNA polymerase III subunit beta	402.766	94.5931	4.12587	0.968996	2.0447	537	24.3669	-0.218173	0.362005	-0.509806	0.371887	-0.291633	0.3889	1.90413	0.385944	0.856027	24.3669	-0.218173	0.362005	-0.602679	0.546722	0.925151	24.3669	-0.509806	0.371887	-1.37086	0.170418	na	24.3669	-0.727979	0.622456
NITMOv2_RS06775	NZ_CP011801	1383703	1384212	+	510	peptidylprolyl isomerase	424.331	316.811	433.066	331.959	384.883	603.809	477.573	315.957	334.519	NITMOv2_1473	ppiB	Peptidyl-prolyl cis-trans isomerase	402.545	95.0738	4.12361	0.97392	2.04391	538	11.0016	0.229723	0.502876	-0.153389	0.521468	-0.383112	0.533268	0.53004	0.767191	na	11.0016	0.229723	0.502876	0.456818	0.647802	na	11.0016	-0.153389	0.521468	-0.294149	0.768644	na	11.0016	0.076334	0.874786
NITMOv2_RS16755	NZ_CP011801	3445375	3446289	-	915	hypothetical protein	538.722	309.021	419.24	314.545	429.049	240.392	362.984	377.373	629.28	NITMOv2_3647	-	conserved protein of unknown function	402.29	120.373	4.12099	1.23308	2.04299	539	19.6695	-0.275459	0.419888	0.0177769	0.410303	0.293236	0.43335	0.584074	0.746741	na	19.6695	-0.275459	0.419888	-0.65603	0.511805	na	19.6695	0.0177769	0.410303	0.0433264	0.965441	na	19.6695	-0.257682	0.708178
NITMOv2_RS09565	NZ_CP011801	1938778	1939254	-	477	acetyl-CoA carboxylase biotin carboxyl carrier protein	226.843	211.706	438.656	425.91	452.661	415.017	510.613	530.853	402.37	NITMOv2_2073	accB	Biotin carboxyl carrier protein of acetyl-CoA carboxylase	401.625	111.771	4.11419	1.14496	2.04061	540	10.2345	0.63538	0.537669	0.604774	0.539365	-0.0306062	0.53631	1.77474	0.411738	na	10.2345	0.63538	0.537669	1.18173	0.237312	na	10.2345	0.604774	0.539365	1.12127	0.262173	na	10.2345	1.24015	0.934011
NITMOv2_RS03220	NZ_CP011801	659485	660663	+	1179	ADP-forming succinate--CoA ligase subunit beta	377.303	291.216	325.365	545.663	316.328	205.221	431.948	410.021	705.427	NITMOv2_0696	sucC	succinyl-CoA synthetase, beta subunit	400.944	149.364	4.1072	1.53006	2.03816	541	25.3384	0.237074	0.402181	0.5592	0.394534	0.322126	0.40224	2.03117	0.36219	0.835	25.3384	0.237074	0.402181	0.589472	0.555545	0.925151	25.3384	0.5592	0.394534	1.41737	0.156375	0.5869	25.3384	0.796274	0.687761
NITMOv2_RS12425	NZ_CP011801	2535431	2536435	-	1005	hypothetical protein	418.701	381.828	636.161	235.84	253.908	766.027	330.478	343.578	233.415	NITMOv2_2684	-	putative anti-sigma regulatory factor, serine/threonine protein kinase	399.993	185.232	4.09746	1.89748	2.03473	542	21.436	-0.147016	0.424369	-0.756584	0.444713	-0.609568	0.458682	3.10088	0.212155	na	21.436	-0.147016	0.424369	-0.346434	0.729017	na	21.436	-0.756584	0.444713	-1.70129	0.0888892	na	21.436	-0.9036	0.738464
NITMOv2_RS17395	NZ_CP011801	3583715	3585541	-	1827	hypothetical protein	401.415	364.801	235.415	370.661	397.522	252.827	412.057	604.788	560.278	NITMOv2_3787	-	putative helicase	399.974	121.773	4.09727	1.24742	2.03466	543	38.835	0.155966	0.322981	0.583324	0.31452	0.427358	0.322618	3.70428	0.156901	0.681664	38.835	0.155966	0.322981	0.482894	0.629171	0.937745	38.835	0.583324	0.31452	1.85464	0.063647	0.445529	38.835	0.739289	0.549906
NITMOv2_RS02610	NZ_CP011801	545169	547043	-	1875	hypothetical protein	461.672	452.406	390.58	415.348	408.283	375.397	259.8	503.365	329.836	NITMOv2_0569	-	conserved protein of unknown function	399.632	73.1524	4.09376	0.749362	2.03343	544	40.1326	-0.00631208	0.292165	-0.337485	0.30019	-0.331173	0.309599	1.5637	0.457559	0.874976	40.1326	-0.00631208	0.292165	-0.0216045	0.982763	0.993309	40.1326	-0.337485	0.30019	-1.12424	0.260912	0.639083	40.1326	-0.343797	0.505072
NITMOv2_RS11390	NZ_CP011801	2293701	2295053	-	1353	hypothetical protein	417.64	328.402	352.254	375.386	348.186	438.943	360.033	408.332	551.66	NITMOv2_2466	-	2-dehydropantoate 2-reductase	397.871	68.1459	4.07572	0.698075	2.02706	545	28.7768	0.172003	0.334555	0.182191	0.334526	0.0101885	0.343418	0.381266	0.826436	0.951191	28.7768	0.172003	0.334555	0.514124	0.607165	0.933726	28.7768	0.182191	0.334526	0.544625	0.586011	0.832844	28.7768	0.354194	0.574224
NITMOv2_RS06625	NZ_CP011801	1348049	1348885	+	837	acetyl-CoA carboxylase carboxyltransferase subunit beta	459.649	386.078	402.757	303.404	492.484	525.589	317.448	385.037	305.743	NITMOv2_1441	accD	acetyl-CoA carboxylase, beta (carboxyltranferase) subunit	397.577	81.6137	4.07271	0.836038	2.02599	546	17.846	0.159346	0.397583	-0.396887	0.419322	-0.556233	0.429829	1.75165	0.416518	na	17.846	0.159346	0.397583	0.400787	0.688577	na	17.846	-0.396887	0.419322	-0.946497	0.343895	na	17.846	-0.237541	0.69502
NITMOv2_RS14660	NZ_CP011801	3005307	3007172	+	1866	transketolase	373.696	270.588	417.382	344.768	389.214	365.42	379.713	579.811	445.712	NITMOv2_3198	Tktl	Transketolase	396.256	84.2697	4.05918	0.863245	2.02119	547	39.3506	0.132457	0.298984	0.299283	0.295552	0.166826	0.303893	1.03107	0.597182	0.909564	39.3506	0.132457	0.298984	0.443022	0.65775	0.953323	39.3506	0.299283	0.295552	1.01262	0.31124	0.680837	39.3506	0.43174	0.511013
NITMOv2_RS15770	NZ_CP011801	3243330	3244895	-	1566	UDP-N-acetylglucosamine diphosphorylase/glucosamine-1-phosphate N-acetyltransferase	383.867	502.983	549.301	378.383	263.224	337.102	353.481	470.39	326.829	NITMOv2_3436	glmU	Bifunctional protein GlmU	396.173	92.6207	4.05834	0.948791	2.02089	548	33.0227	-0.43095	0.317734	-0.395039	0.316978	0.0359109	0.336747	2.41172	0.299435	0.783054	33.0227	-0.43095	0.317734	-1.35632	0.174997	0.758319	33.0227	-0.395039	0.316978	-1.24627	0.212667	0.606494	33.0227	-0.825989	0.538017
NITMOv2_RS17715	NZ_CP011801	3636369	3637268	+	900	universal stress protein	347.322	359.053	297.068	470.276	567.06	586.558	418.238	281.352	236.951	NITMOv2_3861	-	putative Universal stress protein	395.986	124.272	4.05642	1.27302	2.02021	549	19.2977	0.80175	0.384754	-0.167982	0.418308	-0.969732	0.412256	6.95046	0.0309547	na	19.2977	0.80175	0.384754	2.0838	0.0371786	na	19.2977	-0.167982	0.418308	-0.401576	0.687996	na	19.2977	0.633767	0.689985
NITMOv2_RS18545	NZ_CP011801	3814682	3816760	-	2079	HAMP domain-containing protein	318.061	349.727	503.22	350.162	387.104	412.622	426.013	487.19	328.244	NITMOv2_4036	-	putative Histidine kinase	395.816	67.0592	4.05467	0.686943	2.01959	550	43.8662	0.068081	0.285688	-0.0048442	0.287412	-0.0729252	0.295702	0.0784425	0.961538	0.992864	43.8662	0.068081	0.285688	0.238306	0.811644	0.980274	43.8662	-0.0048442	0.287412	-0.0168545	0.986553	0.994032	43.8662	0.0632368	0.490925
NITMOv2_RS07325	NZ_CP011801	1491658	1492797	+	1140	cobalamin biosynthesis protein	305.841	212.597	377.283	386.121	361.587	405.188	466.148	464.433	579.907	NITMOv2_1598	cbiG	Uroporphyrin-III C-methyltransferase	395.456	104.226	4.05099	1.06768	2.01827	551	24.0447	0.43697	0.367946	0.647884	0.362458	0.210914	0.365932	3.32043	0.190098	0.682751	24.0447	0.43697	0.367946	1.18759	0.234993	0.817217	24.0447	0.647884	0.362458	1.78747	0.073861	na	24.0447	1.08485	0.63215
NITMOv2_RS19760	NZ_CP011801	4052904	4053176	-	273	hypothetical protein	0	443.884	383.222	496.115	287.605	402.855	162.213	674.571	703.042	NITMOv2_4300	-	conserved protein of unknown function	394.834	225.724	4.04462	2.31229	2.016	552	5.71823	0.718133	0.814841	0.895702	0.806428	0.177569	0.797505	1.33769	0.512301	na	5.71823	0.718133	0.814841	0.881316	0.378147	na	5.71823	0.895702	0.806428	1.1107	0.266697	na	5.71823	1.61383	1.41159
NITMOv2_RS05550	NZ_CP011801	1131403	1131828	+	426	50S ribosomal protein L11	451.557	284.461	354.735	635.866	368.62	154.901	415.813	486.332	400.481	NITMOv2_1196	rplK	50S ribosomal protein L11	394.752	133.324	4.04377	1.36575	2.0157	553	9.06483	0.223623	0.583927	0.15153	0.587816	-0.0720928	0.601501	0.155771	0.92507	na	9.06483	0.223623	0.583927	0.382964	0.701746	na	9.06483	0.15153	0.587816	0.257785	0.796573	na	9.06483	0.375153	1.00558
NITMOv2_RS16325	NZ_CP011801	3358189	3358815	-	627	thiamine phosphate synthase	249.274	418.752	500.572	297.016	594.819	315.731	317.828	477.283	374.133	NITMOv2_3554	thiE	putative thiamine-phosphate synthase	393.934	112.865	4.0354	1.15617	2.01271	554	13.1861	0.161937	0.482599	-0.0693054	0.492529	-0.231242	0.505344	0.224608	0.893773	na	13.1861	0.161937	0.482599	0.335551	0.73721	na	13.1861	-0.0693054	0.492529	-0.140713	0.888096	na	13.1861	0.0926312	0.834027
NITMOv2_RS15685	NZ_CP011801	3228392	3229000	+	609	DNA-binding response regulator	276.384	364.801	171.789	472.592	451.242	469.535	399.938	377.992	560.278	NITMOv2_3419	-	conserved protein of unknown function	393.839	115.738	4.03442	1.1856	2.01236	555	12.8864	0.931717	0.487276	0.695448	0.496226	-0.236269	0.482227	3.87133	0.144328	na	12.8864	0.931717	0.487276	1.91209	0.0558641	na	12.8864	0.695448	0.496226	1.40147	0.161072	na	12.8864	1.62716	0.857212
NITMOv2_RS02245	NZ_CP011801	455457	456164	+	708	outer membrane lipoprotein carrier protein LolA	152.831	370.844	443.303	310.86	609.941	310.677	469.111	455.192	421.693	NITMOv2_0491	-	putative Outer membrane lipoprotein carrier protein LolA	393.828	128.339	4.03431	1.31469	2.01232	556	14.8713	0.475021	0.479869	0.421156	0.48201	-0.0538643	0.484692	1.17087	0.556862	na	14.8713	0.475021	0.479869	0.989896	0.322225	na	14.8713	0.421156	0.48201	0.873749	0.382255	na	14.8713	0.896177	0.830837
NITMOv2_RS15225	NZ_CP011801	3129492	3130442	-	951	M48 family peptidase	455.118	318.56	391.147	391.649	288.965	300.68	465.658	459.91	470.912	NITMOv2_3322	-	putative Peptidase M48, Ste24p	393.622	74.6444	4.0322	0.764645	2.01157	557	19.9572	-0.146026	0.39368	0.165958	0.383261	0.311984	0.404222	0.602042	0.740062	na	19.9572	-0.146026	0.39368	-0.370925	0.710693	na	19.9572	0.165958	0.383261	0.433017	0.665003	na	19.9572	0.0199327	0.663589
NITMOv2_RS16310	NZ_CP011801	3353924	3354751	-	828	proteasome subunit beta	464.645	561.02	322.9	184.021	331.892	425.042	240.674	444.826	566.622	NITMOv2_3551	prcB	Proteasome subunit beta	393.516	133.577	4.03111	1.36834	2.01118	558	17.2589	-0.422653	0.448001	-0.157793	0.438296	0.26486	0.467027	0.891897	0.640217	na	17.2589	-0.422653	0.448001	-0.94342	0.345466	na	17.2589	-0.157793	0.438296	-0.360014	0.718837	na	17.2589	-0.580446	0.753328
NITMOv2_RS02715	NZ_CP011801	559728	560093	+	366	hypothetical protein	624.129	551.823	317.606	370.053	160.894	240.392	665.471	377.373	233.067	NITMOv2_0591	-	conserved protein of unknown function	393.423	180.997	4.03016	1.85411	2.01084	559	7.65854	-0.810901	0.653032	-0.297903	0.620625	0.512998	0.686175	1.57005	0.456107	na	7.65854	-0.810901	0.653032	-1.24175	0.21433	na	7.65854	-0.297903	0.620625	-0.480004	0.631224	na	7.65854	-1.1088	1.07351
NITMOv2_RS07310	NZ_CP011801	1488979	1489629	+	651	precorrin-8X methylmutase	350.893	372.29	285.699	494.115	482.433	439.242	442.16	247.524	425.857	NITMOv2_1595	cbiC	Cobalt-precorrin-8X methylmutase	393.357	85.6845	4.02949	0.877738	2.0106	560	13.8345	0.614223	0.453486	0.0907733	0.474459	-0.523449	0.472765	2.12526	0.345545	na	13.8345	0.614223	0.453486	1.35445	0.175594	na	13.8345	0.0907733	0.474459	0.19132	0.848275	na	13.8345	0.704996	0.798758
NITMOv2_RS07085	NZ_CP011801	1445798	1446976	-	1179	hypothetical protein	214.145	239.825	374.662	402.068	416.222	223.877	563.41	527.169	578.812	NITMOv2_1543	-	putative Phage integrase	393.354	144.299	4.02946	1.47818	2.01059	561	24.6629	0.445998	0.384539	0.922975	0.372706	0.476976	0.375991	6.17977	0.0455072	0.409565	24.6629	0.445998	0.384539	1.15983	0.24612	0.817217	24.6629	0.922975	0.372706	2.47641	0.013271	0.202878	24.6629	1.36897	0.657413
NITMOv2_RS09710	NZ_CP011801	1969215	1970108	+	894	PDZ domain-containing protein	336.205	429.237	338.07	378.746	548.91	344.455	396.278	386.237	381.666	NITMOv2_2104	-	exported protein of unknown function	393.311	65.7722	4.02902	0.673759	2.01043	562	18.8637	0.334635	0.393036	0.0208995	0.404174	-0.313735	0.410448	0.88563	0.642226	na	18.8637	0.334635	0.393036	0.85141	0.394542	na	18.8637	0.0208995	0.404174	0.0517091	0.95876	na	18.8637	0.355534	0.68352
NITMOv2_RS16915	NZ_CP011801	3480918	3481769	+	852	glycosyltransferase family 2 protein	409.223	640.037	450.241	357.675	322.542	258.168	363.836	405.277	325.391	NITMOv2_3681	-	Glycosyl transferase, family 2	392.488	108.702	4.02058	1.11352	2.0074	563	17.8132	-0.524168	0.40981	-0.504433	0.409379	0.0197347	0.440282	2.24364	0.325687	na	17.8132	-0.524168	0.40981	-1.27905	0.200879	na	17.8132	-0.504433	0.409379	-1.23219	0.217878	na	17.8132	-1.0286	0.690813
NITMOv2_RS03760	NZ_CP011801	770441	771073	-	633	carbon monoxide dehydrogenase	550.803	670.033	312.187	320.946	310.095	451.733	349.795	254.563	303.208	NITMOv2_0815	porD	Pyruvateferredoxin oxidoreductase delta subunit (porD)	391.485	138.188	4.01031	1.41558	2.00371	564	13.2651	-0.379768	0.472766	-0.800004	0.494078	-0.420236	0.521912	2.66878	0.263319	na	13.2651	-0.379768	0.472766	-0.803288	0.421808	na	13.2651	-0.800004	0.494078	-1.61918	0.105408	na	13.2651	-1.17977	0.814156
NITMOv2_RS07295	NZ_CP011801	1486773	1487498	+	726	hypothetical protein	463.685	361.649	224.162	233.195	567.781	121.19	609.973	412.199	528.734	NITMOv2_1592	-	conserved protein of unknown function	391.396	169.669	4.0094	1.73806	2.00339	565	15.1184	-0.0678918	0.511546	0.492821	0.492625	0.560712	0.513409	1.50243	0.471792	na	15.1184	-0.0678918	0.511546	-0.132719	0.894416	na	15.1184	0.492821	0.492625	1.0004	0.317119	na	15.1184	0.424929	0.863209
NITMOv2_RS19865	NZ_CP011801	4067842	4068198	+	357	iron-sulfur cluster assembly accessory protein	235.739	565.734	162.807	379.382	384.883	246.453	558.202	451.367	537.62	NITMOv2_4321	iscA	FeS cluster assembly protein	391.354	150.364	4.00897	1.5403	2.00323	566	7.41916	0.2905	0.65465	0.707257	0.633568	0.416757	0.648369	1.26387	0.531563	na	7.41916	0.2905	0.65465	0.443748	0.657225	na	7.41916	0.707257	0.633568	1.11631	0.26429	na	7.41916	0.997757	1.11336
NITMOv2_RS07285	NZ_CP011801	1485199	1486380	+	1182	ferredoxin	325.488	427.173	481.891	286.462	215.886	316.354	674.376	370.029	414.965	NITMOv2_1590	cbiX	Sirohydrochlorin cobaltochelatase	390.292	133.388	3.99808	1.3664	1.99931	567	24.4092	-0.481431	0.382644	0.175752	0.362377	0.657184	0.39074	2.97751	0.225653	0.703555	24.4092	-0.481431	0.382644	-1.25817	0.20833	0.802865	24.4092	0.175752	0.362377	0.484999	0.627677	na	24.4092	-0.305679	0.634656
NITMOv2_RS05245	NZ_CP011801	1068661	1069539	-	879	protease HtpX	314.587	275.723	251.267	346.688	357.297	350.333	579.37	471.394	558.008	NITMOv2_1132	htpX	Protease HtpX	389.407	118.965	3.98903	1.21866	1.99604	568	18.1958	0.429812	0.413951	0.858991	0.400468	0.429179	0.405284	4.62514	0.0990063	na	18.1958	0.429812	0.413951	1.03832	0.299123	na	18.1958	0.858991	0.400468	2.14497	0.0319553	na	18.1958	1.2888	0.706544
NITMOv2_RS19850	NZ_CP011801	4065699	4066172	+	474	Rrf2 family transcriptional regulator	456.558	468.7	515.005	285.737	331.291	185.619	373.705	437.083	449.907	NITMOv2_4318	-	putative Transcription factor IscR	389.29	105.122	3.98782	1.07685	1.9956	569	9.80049	-0.720417	0.546649	-0.269722	0.520829	0.450695	0.576816	1.77988	0.410681	na	9.80049	-0.720417	0.546649	-1.31788	0.187544	na	9.80049	-0.269722	0.520829	-0.517871	0.604548	na	9.80049	-0.990139	0.898587
NITMOv2_RS11635	NZ_CP011801	2353788	2354615	-	828	peptidoglycan-binding protein	232.323	219.53	421.174	449.829	545.25	823.518	401.124	305.818	103.022	NITMOv2_2518	-	protein of unknown function	389.065	212.154	3.98552	2.17327	1.99477	570	17.4564	1.11942	0.4454	-0.218734	0.490287	-1.33815	0.476907	10.2362	0.00598731	na	17.4564	1.11942	0.4454	2.51329	0.011961	na	17.4564	-0.218734	0.490287	-0.446133	0.655501	na	17.4564	0.900686	0.806278
NITMOv2_RS02895	NZ_CP011801	599926	601125	+	1200	cell division protein FtsZ	190.359	387.104	426.228	409.14	376.223	604.887	369.034	306.93	426.512	NITMOv2_0628	ftsZ	GTP-binding tubulin-like cell division protein	388.491	109.865	3.97964	1.12544	1.99264	571	25.0051	0.582415	0.37224	0.0855252	0.385773	-0.49689	0.385191	2.85049	0.240449	0.74033	25.0051	0.582415	0.37224	1.56462	0.117672	0.672526	25.0051	0.0855252	0.385773	0.221699	0.824549	0.944795	25.0051	0.66794	0.652989
NITMOv2_RS05715	NZ_CP011801	1158799	1159017	+	219	translation initiation factor IF-1	164.695	645.557	477.715	463.834	537.781	0	808.841	105.113	292.131	NITMOv2_1229	infA	protein chain initiation factor IF-1	388.407	266.763	3.97878	2.73268	1.99233	572	4.56717	-0.147983	0.885108	-0.103558	0.882677	0.0444252	0.920415	0.0300379	0.985093	na	4.56717	-0.147983	0.885108	-0.167192	0.867219	na	4.56717	-0.103558	0.882677	-0.117323	0.906604	na	4.56717	-0.251541	1.50927
NITMOv2_RS06470	NZ_CP011801	1320510	1321901	-	1392	RIP metalloprotease RseP	397.302	464.292	467.648	291.895	352.533	331.835	270.413	628.412	291.082	NITMOv2_1408	ecfE	Peptidase M50	388.379	115.605	3.97849	1.18424	1.99222	573	28.6682	-0.336799	0.349983	-0.246029	0.347633	0.09077	0.366786	1.03415	0.596263	0.909564	28.6682	-0.336799	0.349983	-0.962331	0.335884	0.888099	28.6682	-0.246029	0.347633	-0.707727	0.479115	0.792845	28.6682	-0.582829	0.593416
NITMOv2_RS16895	NZ_CP011801	3476263	3477159	-	897	ATP-binding protein	294.871	360.254	259.184	320.857	284.478	343.303	493.69	538.923	594.359	NITMOv2_3677	nubp	Cytosolic Fe-S cluster assembly factor NUBP1 homolog	387.769	122.368	3.97224	1.25352	1.98995	574	18.4039	0.181882	0.41356	0.779543	0.393894	0.597662	0.407635	4.32014	0.115317	na	18.4039	0.181882	0.41356	0.439795	0.660085	na	18.4039	0.779543	0.393894	1.97907	0.0478081	na	18.4039	0.961425	0.697282
NITMOv2_RS01000	NZ_CP011801	222170	225058	+	2889	glycine dehydrogenase (aminomethyl-transferring)	416.154	377.509	366.154	369.188	360.103	289.32	429.198	430.275	450.281	NITMOv2_0227	gcvP	Glycine dehydrogenase, glycine cleavage system P protein	387.576	49.5122	3.97026	0.507195	1.98924	575	59.7565	-0.0721654	0.247917	0.0978584	0.245	0.170024	0.25457	0.452187	0.797643	0.937301	59.7565	-0.0721654	0.247917	-0.291087	0.770985	0.980274	59.7565	0.0978584	0.245	0.399422	0.689582	0.88833	59.7565	0.025693	0.422101
NITMOv2_RS11125	NZ_CP011801	2239232	2240410	-	1179	efflux RND transporter periplasmic adaptor subunit	438.487	222.695	374.662	502.585	266.382	298.503	375.607	527.169	470.285	NITMOv2_2411	-	putative Acriflavine resistance protein A	386.264	107.383	3.95682	1.10001	1.98434	576	24.3762	0.140656	0.388402	0.291947	0.384572	0.151291	0.394636	0.579883	0.748307	0.9321	24.3762	0.140656	0.388402	0.362139	0.717248	0.958372	24.3762	0.291947	0.384572	0.759146	0.447765	na	24.3762	0.432602	0.664656
NITMOv2_RS19750	NZ_CP011801	4050709	4051278	-	570	arginine decarboxylase, pyruvoyl-dependent	295.294	354.328	448.661	386.121	516.553	308.715	543.839	323.084	299.307	NITMOv2_4298	pdaD	putative pyruvoyl-dependent arginine decarboxylase	386.211	95.2372	3.95629	0.975595	1.98415	577	11.8135	0.254161	0.496651	0.00973681	0.507769	-0.244424	0.518555	0.324694	0.850146	na	11.8135	0.254161	0.496651	0.511749	0.608827	na	11.8135	0.00973681	0.507769	0.0191757	0.984701	na	11.8135	0.263898	0.860282
NITMOv2_RS12495	NZ_CP011801	2547779	2548159	-	381	hypothetical protein	378.668	424.078	457.653	311.049	515.197	404.124	406.809	241.677	335.836	NITMOv2_2700	-	conserved protein of unknown function	386.121	81.4359	3.95536	0.834216	1.98381	578	7.90209	0.063697	0.577369	-0.424631	0.6075	-0.488328	0.627881	0.70953	0.701338	na	7.90209	0.063697	0.577369	0.110323	0.912153	na	7.90209	-0.424631	0.6075	-0.698982	0.484564	na	7.90209	-0.360934	1.00528
NITMOv2_RS05460	NZ_CP011801	1117298	1117996	+	699	septal ring lytic transglycosylase RlpA family protein	464.396	520.087	498.901	339.083	533.55	220.274	158.384	493.986	244.07	NITMOv2_1177	-	conserved protein of unknown function	385.859	146.596	3.95268	1.50171	1.98283	579	14.4488	-0.315626	0.466447	-0.813405	0.489506	-0.497779	0.513087	2.80595	0.245864	na	14.4488	-0.315626	0.466447	-0.676659	0.498622	na	14.4488	-0.813405	0.489506	-1.66168	0.096576	na	14.4488	-1.12903	0.806921
NITMOv2_RS09490	NZ_CP011801	1923255	1924646	-	1392	Do family serine endopeptidase	500.946	594.875	492.701	243.246	380.735	237.025	349.946	396.892	275.762	NITMOv2_2058	-	putative periplasmic serine endoprotease DegP-like	385.792	124.698	3.95199	1.27739	1.98258	580	28.5667	-0.764447	0.33704	-0.705387	0.335349	0.0590598	0.364109	6.94815	0.0309905	0.342088	28.5667	-0.764447	0.33704	-2.26812	0.0233222	0.424299	28.5667	-0.705387	0.335349	-2.10344	0.0354271	0.33441	28.5667	-1.46983	0.565274
NITMOv2_RS19175	NZ_CP011801	3940394	3941173	-	780	TIGR00282 family metallophosphoesterase	462.411	336.612	402.383	325.576	377.481	422.998	397.421	472.2	273.405	NITMOv2_4169	-	conserved protein of unknown function	385.61	65.0729	3.95012	0.666597	1.9819	581	16.0634	-0.0146562	0.423029	-0.174542	0.429777	-0.159886	0.447042	0.194995	0.907105	na	16.0634	-0.0146562	0.423029	-0.0346458	0.972362	na	16.0634	-0.174542	0.429777	-0.406122	0.684653	na	16.0634	-0.189198	0.726276
NITMOv2_RS00965	NZ_CP011801	214381	214920	-	540	gamma carbonic anhydrase family protein	289.435	561.02	495.113	250.814	436.2	529.531	205.019	426.291	276.443	NITMOv2_0219	yrdA	Protein YrdA	385.541	132.116	3.94942	1.35338	1.98164	582	11.0969	-0.0385758	0.509415	-0.624855	0.539924	-0.586279	0.559153	1.57154	0.45577	na	11.0969	-0.0385758	0.509415	-0.0757257	0.939637	na	11.0969	-0.624855	0.539924	-1.1573	0.247149	na	11.0969	-0.663431	0.888477
NITMOv2_RS10575	NZ_CP011801	2139250	2139564	-	315	hypothetical protein	305.338	320.583	590.445	322.475	249.257	279.313	421.753	438.471	541.603	NITMOv2_2293	-	conserved exported protein of unknown function	385.471	119.865	3.9487	1.22788	1.98138	583	6.44051	-0.419482	0.67616	0.111203	0.641802	0.530685	0.69674	0.642303	0.725313	na	6.44051	-0.419482	0.67616	-0.620388	0.535002	na	6.44051	0.111203	0.641802	0.173267	0.862442	na	6.44051	-0.308279	1.11927
NITMOv2_RS04000	NZ_CP011801	815118	815990	+	873	rod shape-determining protein MreC	330.521	231.348	532.618	213.321	382.237	377.937	608.715	448.265	341.991	NITMOv2_0869	-	Cell shape-determining protein MreC	385.217	129.325	3.9461	1.32478	1.98043	584	17.8273	-0.117618	0.44307	0.242585	0.431163	0.360204	0.45149	0.676033	0.713184	na	17.8273	-0.117618	0.44307	-0.265462	0.790653	na	17.8273	0.242585	0.431163	0.562631	0.573687	na	17.8273	0.124967	0.74872
NITMOv2_RS02490	NZ_CP011801	518296	518775	-	480	NADH-quinone oxidoreductase subunit B	751.419	504.918	532.785	141.083	245.363	458.248	322.904	287.747	222.142	NITMOv2_0542	nuoB	NADH-quinone oxidoreductase, subunit B	385.179	191.924	3.94571	1.96604	1.98028	585	9.84512	-1.04157	0.556902	-1.1975	0.568041	-0.155933	0.625693	6.0344	0.0489382	na	9.84512	-1.04157	0.556902	-1.87028	0.0614443	na	9.84512	-1.1975	0.568041	-2.10812	0.0350207	na	9.84512	-2.23906	0.934949
NITMOv2_RS22260	NZ_CP011801	4582917	4583258	+	342	transcriptional regulator	386.695	354.328	509.842	198.011	459.158	450.209	323.714	336.546	436.489	NITMOv2_4857	glnB	Nitrogen regulatory protein P-II	383.888	93.5344	3.93249	0.958151	1.97544	586	7.00265	-0.115651	0.625584	-0.276929	0.636418	-0.161278	0.667555	0.192619	0.908183	na	7.00265	-0.115651	0.625584	-0.184868	0.853332	na	7.00265	-0.276929	0.636418	-0.435136	0.663464	na	7.00265	-0.392579	1.07105
NITMOv2_RS20335	NZ_CP011801	4165470	4165739	-	270	twin-arginine translocase TatA/TatE family subunit	178.114	299.211	301.373	250.814	290.8	407.332	574.052	596.808	552.886	NITMOv2_4427	tatA	Sec-independent protein translocase protein TatA	383.488	155.444	3.92839	1.59234	1.97394	587	5.45018	0.392976	0.746806	1.09111	0.705062	0.698135	0.717908	2.51585	0.284243	na	5.45018	0.392976	0.746806	0.526209	0.598743	na	5.45018	1.09111	0.705062	1.54754	0.121733	na	5.45018	1.48409	1.26264
NITMOv2_RS01555	NZ_CP011801	331098	331856	+	759	YebC/PmpR family DNA-binding transcriptional regulator	237.603	452.364	260.362	446.111	336.202	347.761	437.589	424.606	505.745	NITMOv2_0348	-	conserved protein of unknown function	383.149	92.3201	3.92492	0.945712	1.97266	588	15.5246	0.423727	0.446471	0.506079	0.443883	0.0823524	0.448648	1.49275	0.474082	na	15.5246	0.423727	0.446471	0.949057	0.342591	na	15.5246	0.506079	0.443883	1.14012	0.254237	na	15.5246	0.929806	0.76906
NITMOv2_RS23165	NZ_CP011801	4430628	4431269	+	642	acyloxyacyl hydrolase	543.081	346.05	398.344	158.224	183.449	239.831	586.315	358.563	631.131	NITMOv2_4693	-	exported protein of unknown function	382.776	173.772	3.9211	1.78009	1.97126	589	12.9562	-1.07938	0.527114	0.204239	0.462285	1.28362	0.536501	6.42263	0.0403036	na	12.9562	-1.07938	0.527114	-2.04771	0.040588	na	12.9562	0.204239	0.462285	0.441804	0.658631	na	12.9562	-0.875139	0.833834
NITMOv2_RS19715	NZ_CP011801	4042565	4043155	-	591	5-(carboxyamino)imidazole ribonucleotide mutase	244.116	239.217	334.373	343.755	298.919	707.144	599.446	350.554	324.755	NITMOv2_4291	purE	phosphoribosylaminoimidazole carboxylase, mutase subunit	382.475	160.973	3.91802	1.64898	1.97012	590	12.0726	0.784846	0.5132	0.551619	0.52232	-0.233227	0.514022	2.4477	0.294095	na	12.0726	0.784846	0.5132	1.52932	0.126186	na	12.0726	0.551619	0.52232	1.05609	0.290925	na	12.0726	1.33646	0.89898
NITMOv2_RS10340	NZ_CP011801	2096325	2097125	+	801	dienelactone hydrolase family protein	300.192	453.859	275.735	295.904	392.09	494.29	442.288	517.297	266.237	NITMOv2_2241	-	putative Carboxymethylenebutenolidase	381.988	99.1293	3.91302	1.01546	1.96828	591	16.2672	0.323372	0.434261	0.203075	0.438905	-0.120297	0.446271	0.57591	0.749795	na	16.2672	0.323372	0.434261	0.74465	0.456484	na	16.2672	0.203075	0.438905	0.462685	0.64359	na	16.2672	0.526447	0.750521
NITMOv2_RS15220	NZ_CP011801	3126219	3129473	-	3255	carbamoyl-phosphate synthase large subunit	380.442	539.82	371.409	343.28	325.643	418.97	285.703	431.399	340.685	NITMOv2_3321	carB	carbamoyl-phosphate synthase, large subunit	381.928	74.5688	3.91241	0.763871	1.96806	592	66.3095	-0.125402	0.244299	-0.347358	0.248328	-0.221956	0.256784	1.97098	0.373257	0.847982	66.3095	-0.125402	0.244299	-0.513314	0.607732	0.933726	66.3095	-0.347358	0.248328	-1.39879	0.161877	0.589815	66.3095	-0.47276	0.420428
NITMOv2_RS03210	NZ_CP011801	657065	657778	+	714	4Fe-4S ferredoxin	303.093	367.727	309.333	284.537	302.408	462.099	372.135	644.81	388.281	NITMOv2_0694	-	Ferredoxin	381.603	113.559	3.90907	1.16328	1.96683	593	14.4095	0.199761	0.459042	0.448596	0.449851	0.248835	0.463108	1.00223	0.605855	na	14.4095	0.199761	0.459042	0.43517	0.663439	na	14.4095	0.448596	0.449851	0.997211	0.318662	na	14.4095	0.648358	0.782114
NITMOv2_RS09655	NZ_CP011801	1957141	1957506	-	366	hypothetical protein	427.036	331.094	412.888	185.027	321.787	600.981	423.481	440.268	291.333	NITMOv2_2093	-	conserved protein of unknown function	381.544	116.879	3.90847	1.19729	1.96661	594	7.4152	-0.0391254	0.618595	-0.118941	0.623878	-0.0798159	0.651238	0.037191	0.981576	na	7.4152	-0.0391254	0.618595	-0.0632488	0.949568	na	7.4152	-0.118941	0.623878	-0.190648	0.848801	na	7.4152	-0.158067	1.05814
NITMOv2_RS05920	NZ_CP011801	1200875	1201105	+	231	hypothetical protein	572.509	349.727	654.187	219.869	679.793	285.661	95.8529	298.958	276.956	NITMOv2_1277	-	conserved protein of unknown function	381.501	204.78	3.90804	2.09773	1.96644	595	4.75211	-0.345927	0.751936	-1.34129	0.845439	-0.995368	0.88519	2.68333	0.26141	na	4.75211	-0.345927	0.751936	-0.460048	0.645482	na	4.75211	-1.34129	0.845439	-1.58651	0.112624	na	4.75211	-1.68722	1.33296
NITMOv2_RS05240	NZ_CP011801	1068045	1068542	-	498	glutathione peroxidase	531.123	365.001	396.817	373.954	394.157	265.011	533.543	231.122	342.58	NITMOv2_1131	gpo	Glutathione peroxidase	381.479	102.424	3.9078	1.04922	1.96636	596	10.2089	-0.219464	0.534474	-0.309373	0.539621	-0.0899085	0.568726	0.36933	0.831383	na	10.2089	-0.219464	0.534474	-0.410618	0.681353	na	10.2089	-0.309373	0.539621	-0.573315	0.566432	na	10.2089	-0.528837	0.911185
NITMOv2_RS20650	NZ_CP011801	4230001	4230336	+	336	hypothetical protein	143.127	240.437	138.386	302.32	642.616	392.784	395.393	479.578	698.159	NITMOv2_4491	-	conserved exported protein of unknown function	381.422	200.153	3.90723	2.05033	1.96615	597	6.84077	1.51505	0.702503	1.5819	0.699974	0.0668556	0.637897	6.28683	0.0431352	na	6.84077	1.51505	0.702503	2.15664	0.0310339	na	6.84077	1.5819	0.699974	2.25994	0.0238249	na	6.84077	3.09695	1.24901
NITMOv2_RS09650	NZ_CP011801	1956758	1957144	+	387	hypothetical protein	248.531	104.376	630.781	393.719	405.768	511.533	457.716	178.448	495.944	NITMOv2_2092	-	conserved exported protein of unknown function	380.757	171.172	3.90042	1.75346	1.96363	598	7.93779	0.445673	0.643094	0.0762827	0.661488	-0.36939	0.665949	0.548357	0.760196	na	7.93779	0.445673	0.643094	0.693013	0.488301	na	7.93779	0.0762827	0.661488	0.11532	0.908192	na	7.93779	0.521955	1.12196
NITMOv2_RS11105	NZ_CP011801	2232920	2234644	-	1725	ABC transporter ATP-binding protein	313.636	351.247	309.984	422.021	432.407	382.538	269.555	480.412	457.419	NITMOv2_2407	-	Multidrug resistance ABC transporter ATP-binding and permease	379.913	73.2514	3.89177	0.750376	1.96043	599	35.1138	0.464268	0.308069	0.238962	0.313414	-0.225306	0.315291	2.2737	0.320827	0.803418	35.1138	0.464268	0.308069	1.50703	0.131803	0.677738	35.1138	0.238962	0.313414	0.76245	0.445791	0.78586	35.1138	0.703231	0.535594
NITMOv2_RS15835	NZ_CP011801	3257295	3258353	+	1059	3-deoxy-7-phosphoheptulonate synthase	578.997	362.358	329.303	319.734	278.031	353.098	292.718	499.956	402.75	NITMOv2_3449	aroF	3-deoxy-D-arabino-heptulosonate-7-phosphate synthase, tyrosine-repressible	379.661	99.8491	3.88918	1.02284	1.95947	600	21.4275	-0.330299	0.395016	-0.186089	0.390452	0.14421	0.4133	0.724506	0.696106	na	21.4275	-0.330299	0.395016	-0.836166	0.403062	na	21.4275	-0.186089	0.390452	-0.476599	0.633648	na	21.4275	-0.516388	0.667956
NITMOv2_RS17290	NZ_CP011801	3559161	3559514	+	354	hypothetical protein	339.624	171.159	262.698	382.597	388.144	497.083	312.74	520.22	542.176	NITMOv2_3764	-	conserved exported protein of unknown function	379.605	124.133	3.88861	1.27159	1.95925	601	7.18579	0.763532	0.634019	0.707094	0.637336	-0.0564385	0.626881	1.78997	0.408613	na	7.18579	0.763532	0.634019	1.20427	0.228484	na	7.18579	0.707094	0.637336	1.10945	0.267235	na	7.18579	1.47063	1.10606
NITMOv2_RS20750	NZ_CP011801	4251522	4252181	-	660	endonuclease III	273.243	367.213	317.029	359.12	416.373	299.944	436.131	558.054	387.738	NITMOv2_4513	nth	Endonuclease III	379.427	85.5896	3.88679	0.876766	1.95858	602	13.3213	0.30158	0.468258	0.466133	0.462063	0.164552	0.472084	1.05043	0.591428	na	13.3213	0.30158	0.468258	0.644047	0.519545	na	13.3213	0.466133	0.462063	1.00881	0.313067	na	13.3213	0.767713	0.801669
NITMOv2_RS20625	NZ_CP011801	4227239	4228105	-	867	D-amino-acid transaminase	305.074	256.244	402.228	175.743	430.163	405.922	587.389	477.918	368.955	NITMOv2_4486	dat	D-alanine aminotransferase	378.849	121.984	3.88086	1.24958	1.95638	603	17.3889	0.126089	0.439572	0.474485	0.428234	0.348396	0.442187	1.31552	0.51801	na	17.3889	0.126089	0.439572	0.286845	0.774231	na	17.3889	0.474485	0.428234	1.10801	0.267859	na	17.3889	0.600574	0.746784
NITMOv2_RS03285	NZ_CP011801	674371	675366	-	996	outer membrane protein assembly factor BamD	325.917	405.557	221.75	305.963	532.112	309.179	400.157	392.907	513.87	NITMOv2_0710	-	conserved exported protein of unknown function	378.601	100.457	3.87833	1.02906	1.95544	604	20.1503	0.40333	0.40637	0.414247	0.406312	0.0109173	0.410729	1.3536	0.508242	na	20.1503	0.40333	0.40637	0.992519	0.320944	na	20.1503	0.414247	0.406312	1.01953	0.307952	na	20.1503	0.817577	0.701252
NITMOv2_RS01585	NZ_CP011801	336372	337385	+	1014	3-deoxy-7-phosphoheptulonate synthase	367.558	219.097	470.02	333.924	251.654	303.691	480.399	454.038	525.779	NITMOv2_0354	aroF	Phospho-2-dehydro-3-deoxyheptonate aldolase	378.462	109.178	3.8769	1.1184	1.95491	605	20.3872	-0.173501	0.4062	0.35468	0.389295	0.528182	0.411364	1.77057	0.412596	na	20.3872	-0.173501	0.4062	-0.427133	0.669283	na	20.3872	0.35468	0.389295	0.911084	0.362251	na	20.3872	0.181179	0.681085
NITMOv2_RS17330	NZ_CP011801	3567262	3569040	-	1779	tetratricopeptide repeat protein	358.18	454.114	346.314	361.629	397.214	346.198	336.051	336.432	467.509	NITMOv2_3773	-	conserved protein of unknown function	378.182	50.4206	3.87404	0.516501	1.95384	606	36.0123	0.0595852	0.301005	-0.0755337	0.30456	-0.135119	0.314179	0.186196	0.911104	0.979397	36.0123	0.0595852	0.301005	0.197954	0.843081	0.980274	36.0123	-0.0755337	0.30456	-0.248009	0.804127	0.939778	36.0123	-0.0159484	0.5177
NITMOv2_RS06605	NZ_CP011801	1344804	1345316	+	513	cyclic pyranopterin monophosphate synthase MoaC	398.413	196.849	385.214	264.014	114.79	428.77	690.589	673.091	249.422	NITMOv2_1437	moaC	molybdopterin biosynthesis, protein C	377.906	199.83	3.87121	2.04703	1.95278	607	10.1925	-0.237373	0.595785	0.588893	0.558758	0.826266	0.595011	2.16407	0.338905	na	10.1925	-0.237373	0.595785	-0.398421	0.69032	na	10.1925	0.588893	0.558758	1.05393	0.291914	na	10.1925	0.351519	0.990102
NITMOv2_RS16975	NZ_CP011801	3495037	3496602	-	1566	tol-pal system protein YbgF	261.029	270.837	452.802	345.95	501.38	561.837	509.012	264.595	231.504	NITMOv2_3694	-	putative Tol-Pal system protein YbgF (Modular protein)	377.661	128.594	3.86869	1.3173	1.95185	608	31.8167	0.594514	0.352731	-0.0572405	0.367639	-0.651755	0.366888	4.12764	0.126968	0.652275	31.8167	0.594514	0.352731	1.68546	0.0918998	0.590269	31.8167	-0.0572405	0.367639	-0.155698	0.876271	0.959791	31.8167	0.537274	0.620119
NITMOv2_RS09585	NZ_CP011801	1941222	1942445	-	1224	bifunctional phosphopantothenoylcysteine decarboxylase/phosphopantothenate--cysteine ligase CoaBC	353.609	429.015	351.391	359.623	384.883	359.41	397.977	413.753	348.458	NITMOv2_2077	coaBC	Coenzyme A biosynthesis bifunctional protein CoaBC	377.569	29.9681	3.86775	0.306988	1.9515	609	24.6909	0.0847185	0.343655	-0.030207	0.347535	-0.114925	0.359344	0.112328	0.945384	0.992017	24.6909	0.0847185	0.343655	0.246522	0.805278	0.980274	24.6909	-0.030207	0.347535	-0.0869178	0.930737	0.986747	24.6909	0.0545115	0.590449
NITMOv2_RS03300	NZ_CP011801	677220	678212	+	993	inorganic phosphate transporter	254.256	203.391	327.777	272.788	336.046	487.321	468.26	486.822	558.374	NITMOv2_0713	pit	Probable low-affinity inorganic phosphate transporter	377.226	125.311	3.86424	1.28366	1.95019	610	19.873	0.536465	0.404752	0.844909	0.395936	0.308444	0.396812	4.65376	0.0975997	na	19.873	0.536465	0.404752	1.32542	0.185033	na	19.873	0.844909	0.395936	2.13395	0.0328467	na	19.873	1.38137	0.695499
NITMOv2_RS04020	NZ_CP011801	819636	821144	+	1509	ribonuclease E/G	422.268	521.983	369.762	280.483	338.207	320.683	396.179	335.609	409.836	NITMOv2_0873	rng	ribonuclease G	377.223	70.9512	3.86421	0.726813	1.95018	611	30.3198	-0.362822	0.32305	-0.255937	0.320148	0.106885	0.340467	1.38401	0.500572	0.890786	30.3198	-0.362822	0.32305	-1.12312	0.261388	0.818938	30.3198	-0.255937	0.320148	-0.799435	0.424038	0.766005	30.3198	-0.61876	0.545705
NITMOv2_RS19790	NZ_CP011801	4056450	4056863	+	414	hypothetical protein	87.121	487.843	449.252	204.468	284.478	265.651	534.831	667.238	412.089	NITMOv2_4307	-	conserved protein of unknown function	376.997	181.192	3.8619	1.8561	1.94931	612	8.16265	-0.290921	0.660006	0.625722	0.6123	0.916642	0.657813	2.15526	0.340402	na	8.16265	-0.290921	0.660006	-0.440785	0.659369	na	8.16265	0.625722	0.6123	1.02192	0.306818	na	8.16265	0.334801	1.0901
NITMOv2_RS17765	NZ_CP011801	3650207	3651487	-	1281	hypothetical protein	619.436	315.327	508.17	224.675	337.11	343.418	328.414	341.432	366.248	NITMOv2_3872	-	Glycosyl transferase, family 2	376.026	116.961	3.85195	1.19813	1.94559	613	25.7201	-0.612774	0.365518	-0.583162	0.364841	0.0296122	0.390604	3.89886	0.142355	0.681664	25.7201	-0.612774	0.365518	-1.67645	0.0936494	0.592269	25.7201	-0.583162	0.364841	-1.5984	0.109954	0.539549	25.7201	-1.19594	0.617133
NITMOv2_RS16655	NZ_CP011801	3417425	3419206	-	1782	B12-binding domain-containing radical SAM protein	290.11	283.343	410.963	332.518	374.515	308.585	372.761	555.47	454.755	NITMOv2_3622	-	conserved protein of unknown function	375.891	88.0659	3.85057	0.902133	1.94507	614	35.5996	0.142896	0.312208	0.397051	0.306593	0.254155	0.315498	1.71931	0.423309	0.867735	35.5996	0.142896	0.312208	0.457694	0.647172	0.946489	35.5996	0.397051	0.306593	1.29504	0.195306	0.601542	35.5996	0.539947	0.532361
NITMOv2_RS00950	NZ_CP011801	211895	212791	+	897	acetylglutamate kinase	308.274	360.254	323.98	434.101	350.127	367.825	469.006	410.608	356.615	NITMOv2_0216	argB	Acetylglutamate kinase	375.643	52.2915	3.84803	0.535666	1.94412	615	18.0354	0.342324	0.400855	0.250325	0.404357	-0.0919988	0.411056	0.787653	0.674471	na	18.0354	0.342324	0.400855	0.853983	0.393114	na	18.0354	0.250325	0.404357	0.619069	0.535871	na	18.0354	0.592648	0.692395
NITMOv2_RS06115	NZ_CP011801	1238722	1239165	+	444	hypothetical protein	216.625	409.393	445.078	457.566	663.142	198.161	299.216	259.231	432.276	NITMOv2_1321	-	conserved protein of unknown function	375.632	147.781	3.84791	1.51384	1.94408	616	9.01941	0.448827	0.579092	-0.160569	0.60963	-0.609396	0.613666	1.11356	0.573053	na	9.01941	0.448827	0.579092	0.775053	0.438308	na	9.01941	-0.160569	0.60963	-0.263388	0.792252	na	9.01941	0.288258	1.01853
NITMOv2_RS22900	NZ_CP011801	3258497	3258847	+	351	hypothetical protein	274.022	230.162	331.179	385.867	391.462	438.665	315.413	524.666	486.054	na	-	na	375.277	97.3524	3.84427	0.997263	1.94271	617	7.03558	0.621145	0.629434	0.564599	0.632943	-0.0565469	0.630031	1.19047	0.551434	na	7.03558	0.621145	0.629434	0.986831	0.323725	na	7.03558	0.564599	0.632943	0.892022	0.372381	na	7.03558	1.18574	1.09392
NITMOv2_RS05655	NZ_CP011801	1152120	1152461	+	342	50S ribosomal protein L24	386.695	472.438	373.884	495.027	344.369	128.631	453.199	336.546	374.133	NITMOv2_1217	rplX	50S ribosomal subunit protein L24	373.88	107.969	3.82997	1.10601	1.93733	618	6.86271	-0.174025	0.647258	-0.13984	0.645713	0.034185	0.680952	0.0852657	0.958263	na	6.86271	-0.174025	0.647258	-0.268865	0.788034	na	6.86271	-0.13984	0.645713	-0.216566	0.828546	na	6.86271	-0.313865	1.09913
NITMOv2_RS00785	NZ_CP011801	181907	182350	+	444	hypothetical protein	433.25	500.369	418.897	266.913	486.304	495.403	99.7388	311.077	336.214	NITMOv2_0183	-	conserved protein of unknown function	372.019	132.705	3.8109	1.35941	1.93013	619	8.87218	-0.0201765	0.551176	-0.921081	0.607311	-0.900904	0.627028	2.79158	0.247638	na	8.87218	-0.0201765	0.551176	-0.0366063	0.970799	na	8.87218	-0.921081	0.607311	-1.51666	0.129354	na	8.87218	-0.941257	0.975745
NITMOv2_RS10590	NZ_CP011801	2141441	2142004	-	564	aminodeoxychorismate/anthranilate synthase component II	319.753	322.288	329.77	390.229	556.851	233.999	431.848	571.412	189.057	NITMOv2_2296	pabA	aminodeoxychorismate synthase, subunit II	371.69	131.027	3.80753	1.34222	1.92885	620	11.2202	0.403304	0.525701	0.202694	0.534541	-0.20061	0.540247	0.589817	0.7446	na	11.2202	0.403304	0.525701	0.767175	0.442978	na	11.2202	0.202694	0.534541	0.379193	0.704545	na	11.2202	0.605999	0.912318
NITMOv2_RS15945	NZ_CP011801	3275007	3275984	-	978	class 1 fructose-bisphosphatase	467.14	330.417	356.576	242.351	301.058	472.305	316.961	400.138	457.912	NITMOv2_3474	fbp	Fructose-1,6-bisphosphatase	371.651	82.2512	3.80713	0.842568	1.9287	621	19.3532	-0.121035	0.402664	-0.0642743	0.400995	0.0567606	0.41987	0.092245	0.954925	na	19.3532	-0.121035	0.402664	-0.300586	0.76373	na	19.3532	-0.0642743	0.400995	-0.160287	0.872655	na	19.3532	-0.185309	0.685258
NITMOv2_RS07305	NZ_CP011801	1487876	1488982	+	1107	cobalt-precorrin-5B (C(1))-methyltransferase	358.4	346.646	420.032	198.816	461.025	317.917	400.036	415.894	423.815	NITMOv2_1594	-	putative cobalt-precorrin-6A synthase (deacetylating)	371.398	78.5591	3.80454	0.804746	1.92772	622	21.8543	-0.119762	0.383449	0.057437	0.378005	0.177199	0.396214	0.207785	0.901322	0.976433	21.8543	-0.119762	0.383449	-0.312328	0.754791	0.980274	21.8543	0.057437	0.378005	0.151948	0.879228	na	21.8543	-0.0623248	0.650274
NITMOv2_RS11405	NZ_CP011801	2296716	2297864	+	1149	response regulator	355.763	527.329	435.029	235.752	256.253	555.162	366.143	400.692	204.162	NITMOv2_2469	-	putative Response regulator, CheY like (Modular protein)	370.698	123.938	3.79737	1.2696	1.925	623	22.619	-0.240976	0.390063	-0.506437	0.39919	-0.265461	0.416973	1.61936	0.445001	0.867735	22.619	-0.240976	0.390063	-0.617787	0.536715	0.925151	22.619	-0.506437	0.39919	-1.26866	0.204562	na	22.619	-0.747414	0.670178
NITMOv2_RS08415	NZ_CP011801	1713938	1715071	+	1134	iron ABC transporter permease	286.255	391.823	379.279	283.658	501.976	368.538	273.358	324.793	526.558	NITMOv2_1828	btuC	Vitamin B12 import system, permease protein BtuC	370.693	92.4255	3.79732	0.946792	1.92498	624	22.4937	0.23691	0.382769	0.0342623	0.38912	-0.202648	0.396948	0.438515	0.803115	0.937301	22.4937	0.23691	0.382769	0.618939	0.535956	0.925151	22.4937	0.0342623	0.38912	0.0880507	0.929836	na	22.4937	0.271173	0.662031
NITMOv2_RS17165	NZ_CP011801	3526495	3531012	-	4518	glutamate synthase large subunit	356.583	482.79	388.509	307.272	291.09	355.401	289.15	509.511	354.011	NITMOv2_3736	gltB	glutamate synthase, large subunit	370.48	78.9563	3.79513	0.808815	1.92415	625	88.8835	-0.246834	0.229238	-0.160234	0.228156	0.0866001	0.236696	1.21536	0.544614	0.894921	88.8835	-0.246834	0.229238	-1.07676	0.281588	0.831599	88.8835	-0.160234	0.228156	-0.7023	0.482492	0.792845	88.8835	-0.407068	0.391389
NITMOv2_RS09195	NZ_CP011801	1871563	1872576	+	1014	methyltransferase	379.415	537.782	550.267	300.531	406.518	412.152	262.036	136.211	336.499	NITMOv2_1997	tcmO	Tetracenomycin polyketide synthesis 8-O-methyl transferase TcmO	369.046	130.432	3.78044	1.33612	1.91856	626	20.1182	-0.28405	0.387481	-1.04748	0.418965	-0.763435	0.437361	6.48647	0.0390374	na	20.1182	-0.28405	0.387481	-0.733068	0.463517	na	20.1182	-1.04748	0.418965	-2.50017	0.0124132	na	20.1182	-1.33153	0.678278
NITMOv2_RS02920	NZ_CP011801	603786	604310	+	525	DivIVA domain-containing protein	458.008	384.699	376.409	290.227	373.886	335.176	379.577	306.93	406.202	NITMOv2_0633	-	putative Cell division protein DivIVA	367.902	51.1548	3.76872	0.524022	1.91408	627	10.3295	-0.192085	0.515682	-0.235604	0.518477	-0.0435186	0.547819	0.247692	0.883516	na	10.3295	-0.192085	0.515682	-0.372488	0.70953	na	10.3295	-0.235604	0.518477	-0.454415	0.64953	na	10.3295	-0.427689	0.877146
NITMOv2_RS07970	NZ_CP011801	1623287	1623730	-	444	gamma-glutamylcyclotransferase	568.641	272.929	340.354	266.913	265.257	495.403	349.086	414.77	336.214	NITMOv2_1740	-	conserved protein of unknown function	367.73	106.431	3.76696	1.09026	1.9134	628	8.71304	-0.157303	0.576484	-0.218603	0.580393	-0.0613	0.609929	0.160731	0.922779	na	8.71304	-0.157303	0.576484	-0.272867	0.784956	na	8.71304	-0.218603	0.580393	-0.376647	0.706436	na	8.71304	-0.375906	0.983039
NITMOv2_RS00795	NZ_CP011801	183897	184637	-	741	gamma-glutamyl-gamma-aminobutyrate hydrolase family protein	194.7	163.536	376.499	319.864	211.919	563.998	448.219	310.658	719.487	NITMOv2_0185	-	putative Gamma-glutamyl-gamma-aminobutyrate hydrolase	367.653	183.803	3.76618	1.88285	1.9131	629	14.4964	0.624592	0.512728	0.911301	0.50402	0.286709	0.501694	3.38364	0.184184	na	14.4964	0.624592	0.512728	1.21817	0.223158	na	14.4964	0.911301	0.50402	1.80807	0.0705963	na	14.4964	1.53589	0.884396
NITMOv2_RS02200	NZ_CP011801	446208	446939	-	732	hypothetical protein	443.46	193.138	397.008	231.283	509.496	270.442	483.979	283.029	495.267	NITMOv2_0482	-	conserved exported protein of unknown function	367.456	123.596	3.76416	1.2661	1.91233	630	14.3936	0.0238564	0.487611	0.177211	0.482236	0.153354	0.499408	0.156716	0.924633	na	14.3936	0.0238564	0.487611	0.0489251	0.960979	na	14.3936	0.177211	0.482236	0.367477	0.713263	na	14.3936	0.201067	0.831399
NITMOv2_RS05900	NZ_CP011801	1196819	1197706	+	888	nitrate ABC transporter, permease protein	311.399	341.161	405.806	381.305	663.142	272.472	199.478	440.693	288.184	NITMOv2_1272	nrtB	Nitrate ABC transporter, integral membrane subunit (modular protein)	367.071	133.141	3.76022	1.36387	1.91082	631	17.5716	0.428675	0.429516	-0.277037	0.454394	-0.705712	0.457553	2.49228	0.287613	na	17.5716	0.428675	0.429516	0.998043	0.318258	na	17.5716	-0.277037	0.454394	-0.609684	0.542071	na	17.5716	0.151638	0.756678
NITMOv2_RS03090	NZ_CP011801	634602	635492	+	891	5,10-methylenetetrahydrofolate reductase	296.857	408.014	365.301	380.021	308.424	271.554	298.209	542.553	430.82	NITMOv2_0669	metF	Methylenetetrahydrofolate reductase	366.861	85.8337	3.75807	0.879266	1.90999	632	17.3838	-0.0159503	0.42032	0.183975	0.413401	0.199926	0.431509	0.275119	0.871482	na	17.3838	-0.0159503	0.42032	-0.0379481	0.969729	na	17.3838	0.183975	0.413401	0.445029	0.656298	na	17.3838	0.168025	0.713399
NITMOv2_RS21270	NZ_CP011801	4366426	4366908	+	483	D-glycero-beta-D-manno-heptose 1-phosphate adenylyltransferase	398.267	376.336	481.341	280.413	121.919	728.643	275.056	285.959	353.219	NITMOv2_4626	rfaEb	D-beta-D-heptose 1-phosphate adenosyltransferase	366.795	168.707	3.75739	1.72821	1.90973	633	9.45187	-0.098297	0.574777	-0.538954	0.598542	-0.440657	0.621244	0.878796	0.644424	na	9.45187	-0.098297	0.574777	-0.171018	0.86421	na	9.45187	-0.538954	0.598542	-0.900445	0.367884	na	9.45187	-0.637251	0.99564
NITMOv2_RS19210	NZ_CP011801	3948748	3950133	+	1386	insulinase family protein	581.184	335.155	385.802	256.514	524.007	269.791	271.583	365.393	307.729	NITMOv2_4177	-	putative Zn-dependent peptidase, M16 family	366.351	115.199	3.75284	1.18008	1.90798	634	27.2569	-0.227367	0.368259	-0.563722	0.378317	-0.336355	0.393289	2.2512	0.324457	0.803418	27.2569	-0.227367	0.368259	-0.617412	0.536963	0.925151	27.2569	-0.563722	0.378317	-1.49008	0.136203	0.563592	27.2569	-0.791089	0.634665
NITMOv2_RS20875	NZ_CP011801	4289763	4290677	-	915	hypothetical protein	394.187	331.094	393.832	314.545	386.144	625.02	290.387	301.898	256.373	NITMOv2_4541	-	conserved exported protein of unknown function	365.942	108.844	3.74865	1.11498	1.90637	635	17.9977	0.311525	0.398016	-0.489675	0.428911	-0.8012	0.435056	3.42614	0.180311	na	17.9977	0.311525	0.398016	0.782694	0.433807	na	17.9977	-0.489675	0.428911	-1.14167	0.253591	na	17.9977	-0.17815	0.70391
NITMOv2_RS15240	NZ_CP011801	3132551	3133072	-	522	hypothetical protein	506.704	502.983	578.993	356.761	150.414	210.689	212.088	529.189	245.122	NITMOv2_3325	-	conserved membrane protein of unknown function	365.883	165.659	3.74804	1.69698	1.90614	636	10.145	-1.00965	0.557965	-0.783316	0.54466	0.226332	0.605127	4.04153	0.132554	na	10.145	-1.00965	0.557965	-1.80952	0.0703703	na	10.145	-0.783316	0.54466	-1.43817	0.150385	na	10.145	-1.79296	0.921835
NITMOv2_RS18685	NZ_CP011801	3841278	3841835	-	558	hypothetical protein	495.559	542.922	395.813	273.063	246.242	354.773	198.405	288.778	496.833	NITMOv2_4065	-	conserved membrane protein of unknown function	365.821	124.122	3.74741	1.27148	1.90589	637	10.8865	-0.604785	0.521493	-0.597415	0.521614	0.00737016	0.563948	1.9103	0.384754	na	10.8865	-0.604785	0.521493	-1.15972	0.246163	na	10.8865	-0.597415	0.521614	-1.14532	0.252076	na	10.8865	-1.2022	0.877516
NITMOv2_RS08880	NZ_CP011801	1815653	1815925	-	273	hypothetical protein	220.196	369.903	212.901	558.129	143.802	483.427	162.213	505.928	624.926	na	-	na	364.603	184.703	3.73493	1.89207	1.90108	638	5.32507	0.731227	0.766785	0.662134	0.771257	-0.0690925	0.761347	1.08784	0.580467	na	5.32507	0.731227	0.766785	0.953627	0.340272	na	5.32507	0.662134	0.771257	0.858513	0.390609	na	5.32507	1.39336	1.33639
NITMOv2_RS04180	NZ_CP011801	855871	856905	-	1035	energy transducer TonB	209.09	409.788	235.857	261.719	531.026	446.294	427.865	489.308	267.858	NITMOv2_0910	-	putative TonB protein	364.312	120.763	3.73195	1.23707	1.89993	639	20.0849	0.675562	0.413285	0.438188	0.4204	-0.237374	0.417207	2.72518	0.255997	na	20.0849	0.675562	0.413285	1.63461	0.10213	na	20.0849	0.438188	0.4204	1.04231	0.297267	na	20.0849	1.11375	0.721818
NITMOv2_RS07920	NZ_CP011801	1615007	1616959	+	1953	B12-binding domain-containing radical SAM protein	400.141	361.948	321.412	346.747	402.028	259.04	328.786	518.622	338.502	NITMOv2_1729	-	conserved protein of unknown function	364.136	72.1824	3.73015	0.739424	1.89923	640	37.9467	0.0128463	0.306705	0.0452485	0.306169	0.0324022	0.316373	0.0228605	0.988635	0.994035	37.9467	0.0128463	0.306705	0.0418848	0.966591	0.985543	37.9467	0.0452485	0.306169	0.147789	0.882509	0.959791	37.9467	0.0580947	0.524902
NITMOv2_RS00480	NZ_CP011801	110969	112105	-	1137	hypothetical protein	518.129	337.5	224.922	327.58	483.388	328.875	350.533	283.444	412.633	NITMOv2_0117	-	protein of unknown function	363	93.3012	3.71852	0.955763	1.89473	641	22.215	0.173525	0.399727	-0.125425	0.408886	-0.29895	0.417594	0.521477	0.770482	0.9321	22.215	0.173525	0.399727	0.434109	0.664209	0.953323	22.215	-0.125425	0.408886	-0.306748	0.759035	na	22.215	0.0481001	0.692499
NITMOv2_RS15730	NZ_CP011801	3235583	3236869	-	1287	phosphopyruvate hydratase	308.274	345.243	352.254	381.482	274.532	358.908	430.109	447.159	364.54	NITMOv2_3428	eno	Enolase	362.5	53.8483	3.71339	0.551613	1.89274	642	24.8664	0.1295	0.349907	0.229092	0.347229	0.0995924	0.358452	0.440309	0.802395	0.937301	24.8664	0.1295	0.349907	0.370099	0.711309	0.958372	24.8664	0.229092	0.347229	0.659774	0.509399	0.794002	24.8664	0.358592	0.597927
NITMOv2_RS01590	NZ_CP011801	337398	338291	+	894	prephenate dehydrogenase/arogenate dehydrogenase family protein	255.516	338.871	390.08	454.495	241.52	270.643	495.347	386.237	429.374	NITMOv2_0355	-	fragment of bifunctional protein [Includes putative prephenate or cyclohexadienyl dehydrogenase; 3-phosphoshikimate 1-carboxyvinyltransferase (5- enolpyruvylshikimate-3-phosphate synthase) (EPSP synthase) (EPSPS) (AroA)] (part 1)	362.454	91.505	3.71292	0.937363	1.89255	643	17.2996	0.113584	0.431429	0.345321	0.423775	0.231737	0.437866	0.685035	0.709981	na	17.2996	0.113584	0.431429	0.263273	0.792341	na	17.2996	0.345321	0.423775	0.814869	0.415147	na	17.2996	0.458904	0.734647
NITMOv2_RS03265	NZ_CP011801	671335	672249	+	915	c-type cytochrome biogenesis protein CcsB	275.931	662.187	203.268	314.545	193.072	504.824	483.979	226.424	396.213	NITMOv2_0706	ccsA	Cytochrome c biogenesis protein ccsA	362.271	161.374	3.71105	1.65309	1.89183	644	17.6359	-0.0201916	0.483769	-0.0455287	0.484856	-0.0253371	0.499481	0.0163193	0.991874	na	17.6359	-0.0201916	0.483769	-0.0417381	0.966707	na	17.6359	-0.0455287	0.484856	-0.0939015	0.925187	na	17.6359	-0.0657203	0.829913
NITMOv2_RS20285	NZ_CP011801	4155451	4156209	-	759	hypothetical protein	269.283	266.096	367.57	289.972	336.202	260.821	758.488	485.264	224.776	NITMOv2_4413	-	conserved protein of unknown function	362.053	167.758	3.70881	1.71849	1.89096	645	14.5528	0.0747166	0.491712	0.609045	0.47282	0.534328	0.490452	1.96769	0.37387	na	14.5528	0.0747166	0.491712	0.151952	0.879225	na	14.5528	0.609045	0.47282	1.28811	0.197707	na	14.5528	0.683762	0.830744
NITMOv2_RS11585	NZ_CP011801	2337576	2339117	-	1542	hypothetical protein	288.482	261.955	286.464	373.293	521.913	256.762	445.138	417.998	401.065	NITMOv2_2507	-	exported protein of unknown function	361.452	93.1835	3.70266	0.954557	1.88856	646	29.8778	0.572485	0.339607	0.512037	0.341235	-0.0604476	0.340923	3.40094	0.182598	0.681664	29.8778	0.572485	0.339607	1.68573	0.0918479	0.590269	29.8778	0.512037	0.341235	1.50054	0.133475	0.558562	29.8778	1.08452	0.589339
NITMOv2_RS01450	NZ_CP011801	309356	311071	+	1716	phenylalanine--tRNA ligase subunit beta	399.355	306.011	359.028	305.844	320.287	410.18	270.969	375.613	497.1	NITMOv2_0325	pheT	Phenylalanyl-tRNA synthetase beta chain	360.488	69.3338	3.69278	0.710244	1.88471	647	33.0442	0.0434363	0.321932	0.0176882	0.322796	-0.0257481	0.333181	0.0187026	0.990692	0.994035	33.0442	0.0434363	0.321932	0.134924	0.892672	0.980274	33.0442	0.0176882	0.322796	0.0547968	0.9563	0.98957	33.0442	0.0611245	0.551966
NITMOv2_RS10995	NZ_CP011801	2217418	2218494	-	1077	calcium/proton exchanger	379.547	337.55	377.766	220.073	273.385	408.466	472.856	555.722	217.81	NITMOv2_2383	VCX	Vacuolar calcium ion transporter	360.353	112.857	3.6914	1.15609	1.88417	648	20.5179	-0.205487	0.40748	0.0909396	0.398006	0.296427	0.419176	0.520623	0.770812	na	20.5179	-0.205487	0.40748	-0.504289	0.614059	na	20.5179	0.0909396	0.398006	0.228488	0.819267	na	20.5179	-0.114548	0.687887
NITMOv2_RS19845	NZ_CP011801	4065165	4065581	-	417	ferredoxin	374.808	339.034	167.257	284.195	470.72	263.74	584.082	441.625	306.843	NITMOv2_4317	fdxB	2Fe-2S ferredoxin	359.145	124.887	3.67902	1.27932	1.87932	649	7.981	0.334595	0.619613	0.534345	0.610073	0.19975	0.621306	0.78398	0.675711	na	7.981	0.334595	0.619613	0.540007	0.589192	na	7.981	0.534345	0.610073	0.875871	0.3811	na	7.981	0.86894	1.06122
NITMOv2_RS14625	NZ_CP011801	2996429	2999257	-	2829	pyruvate, phosphate dikinase	348.484	449.768	427.337	347.096	319.171	318.781	414.82	276.66	324.143	NITMOv2_3191	ppdK	Pyruvate, phosphate dikinase	358.473	58.6017	3.67214	0.600306	1.87662	650	54.2566	-0.192526	0.258569	-0.332276	0.26158	-0.13975	0.27245	1.66177	0.435664	0.867735	54.2566	-0.192526	0.258569	-0.744582	0.456524	0.925151	54.2566	-0.332276	0.26158	-1.27027	0.20399	0.606291	54.2566	-0.524803	0.443098
NITMOv2_RS18755	NZ_CP011801	3857564	3858733	+	1170	KamA family radical SAM protein	318.55	448.816	397.415	188.11	335.539	338.399	473.12	393.5	328.086	NITMOv2_4079	kamA	L-lysine 2,3-aminomutase	357.948	84.0508	3.66676	0.861003	1.87451	651	22.1718	-0.33287	0.379953	-0.0233041	0.36977	0.309566	0.394215	0.900879	0.637348	0.917781	22.1718	-0.33287	0.379953	-0.876082	0.380986	0.890601	22.1718	-0.0233041	0.36977	-0.063023	0.949748	na	22.1718	-0.356174	0.637795
NITMOv2_RS01060	NZ_CP011801	234156	235382	-	1227	hypothetical protein	382.14	444.427	388.427	317.35	399.939	376.458	342.867	262.654	295.465	NITMOv2_0239	-	conserved protein of unknown function	356.636	56.9472	3.65332	0.583358	1.86921	652	23.4794	-0.0402754	0.347739	-0.493877	0.363789	-0.453602	0.377574	2.13737	0.34346	0.816061	23.4794	-0.0402754	0.347739	-0.115821	0.907795	0.980274	23.4794	-0.493877	0.363789	-1.35759	0.174593	na	23.4794	-0.534152	0.603297
NITMOv2_RS14505	NZ_CP011801	2973970	2974899	-	930	RNA methyltransferase	374.901	434.338	412.478	327.676	337.703	354.773	261.895	222.772	481.546	NITMOv2_3165	-	putative 23S rRNA methyltransferase RlmB	356.454	81.5383	3.65145	0.835265	1.86847	653	17.7766	-0.147562	0.4105	-0.393796	0.420428	-0.246234	0.439508	0.887762	0.641542	na	17.7766	-0.147562	0.4105	-0.359468	0.719245	na	17.7766	-0.393796	0.420428	-0.936655	0.348936	na	17.7766	-0.541358	0.705246
NITMOv2_RS23185	NZ_CP011801	4517817	4518059	+	243	type II toxin-antitoxin system HicA family toxin	395.809	748.027	239.185	139.341	403.889	452.591	91.1194	473.657	263.279	NITMOv2_4788	-	conserved protein of unknown function	356.322	200.025	3.6501	2.04903	1.86794	654	4.58888	-0.347095	0.799322	-0.770162	0.836003	-0.423067	0.882376	0.855692	0.651912	na	4.58888	-0.347095	0.799322	-0.434237	0.664117	na	4.58888	-0.770162	0.836003	-0.921243	0.356924	na	4.58888	-1.11726	1.37733
NITMOv2_RS04355	NZ_CP011801	881618	882418	-	801	thiazole biosynthesis protein	195.125	403.43	377.321	274.768	318.573	384.448	525.216	459.82	266.237	NITMOv2_0947	-	putative ribose 1,5-bisphosphate isomerase	356.104	102.995	3.64787	1.05506	1.86706	655	15.1131	0.126354	0.459983	0.30618	0.453638	0.179826	0.468223	0.462232	0.793648	na	15.1131	0.126354	0.459983	0.274693	0.783552	na	15.1131	0.30618	0.453638	0.674944	0.499711	na	15.1131	0.432534	0.784545
NITMOv2_RS22065	NZ_CP011801	4542019	4543422	+	1404	3-isopropylmalate dehydratase large subunit	291.148	489.094	413.974	325.576	251.654	375.998	488.891	278.729	288.594	NITMOv2_4816	leuC	3-isopropylmalate dehydratase (isomerase), subunit with LeuD	355.962	90.6013	3.64642	0.928105	1.86648	656	26.6394	-0.198258	0.358586	-0.226027	0.359674	-0.0277696	0.37633	0.487173	0.783812	0.937301	26.6394	-0.198258	0.358586	-0.552887	0.580341	0.930135	26.6394	-0.226027	0.359674	-0.628422	0.529727	0.807864	26.6394	-0.424285	0.61178
NITMOv2_RS00310	NZ_CP011801	68270	68905	-	636	hypothetical protein	340.265	508.093	310.715	266.194	216.043	380.432	382.959	325.751	469.431	NITMOv2_0064	-	putative 4-hydroxyphenylpyruvate dioxygenase	355.543	92.3225	3.64212	0.945737	1.86478	657	12.0014	-0.298958	0.499621	-0.010987	0.4864	0.287971	0.519448	0.432448	0.805555	na	12.0014	-0.298958	0.499621	-0.598369	0.549593	na	12.0014	-0.010987	0.4864	-0.0225885	0.981979	na	12.0014	-0.309945	0.838205
NITMOv2_RS09250	NZ_CP011801	1882466	1882675	-	210	hypothetical protein	400.757	0	830.314	322.475	280.414	104.742	632.629	219.236	406.202	NITMOv2_2008	-	exported protein of unknown function	355.197	255.3	3.63858	2.61525	1.86337	658	3.98839	-0.732953	0.94686	-0.116132	0.897719	0.616821	0.980456	0.678854	0.712178	na	3.98839	-0.732953	0.94686	-0.774088	0.438879	na	3.98839	-0.116132	0.897719	-0.129363	0.897071	na	3.98839	-0.849084	1.5632
NITMOv2_RS20955	NZ_CP011801	4304379	4304981	-	603	metallophosphoesterase	418.701	334.937	346.997	308.838	423.179	182.387	293.758	458.104	424.39	NITMOv2_4559	-	Phosphoesterase, putative (modular protein)	354.588	86.814	3.63234	0.889308	1.8609	659	11.4129	-0.153296	0.510257	0.00690924	0.503181	0.160205	0.530375	0.120405	0.941574	na	11.4129	-0.153296	0.510257	-0.300428	0.763851	na	11.4129	0.00690924	0.503181	0.0137311	0.989044	na	11.4129	-0.146386	0.863602
NITMOv2_RS15715	NZ_CP011801	3232865	3234202	-	1338	magnesium transporter	350.437	528.315	382.267	291.023	220.056	312.348	264.778	361.296	478.152	NITMOv2_3425	mgtE	Magnesium transporter MgtE	354.297	98.9104	3.62936	1.01322	1.85972	660	25.1807	-0.482817	0.364992	-0.237723	0.357347	0.245094	0.382684	1.76598	0.413544	0.867735	25.1807	-0.482817	0.364992	-1.32281	0.185897	0.763156	25.1807	-0.237723	0.357347	-0.665245	0.505894	0.794002	25.1807	-0.72054	0.612687
NITMOv2_RS18700	NZ_CP011801	3843617	3846637	-	3021	VWA domain-containing protein	322.356	361.014	415.569	397.89	272.896	385.893	381.127	304.796	345.897	NITMOv2_4068	-	conserved protein of unknown function	354.16	46.8841	3.62796	0.480273	1.85916	661	57.3376	0.0547741	0.256213	-0.163161	0.260366	-0.217935	0.267315	0.717638	0.698501	0.929113	57.3376	0.0547741	0.256213	0.213784	0.830716	0.980274	57.3376	-0.163161	0.260366	-0.62666	0.530882	0.807864	57.3376	-0.108387	0.442055
NITMOv2_RS01575	NZ_CP011801	334190	335266	+	1077	prephenate dehydratase	334.894	243.786	237.453	392.988	473.867	326.773	328.944	213.739	633.63	NITMOv2_0352	pheA	P-protein, bifunctional chorismate mutase/prephenate dehydratase	354.008	132.862	3.6264	1.36102	1.85854	662	20.567	0.649397	0.425048	0.456097	0.430536	-0.1933	0.428123	2.43796	0.295532	na	20.567	0.649397	0.425048	1.52782	0.126557	na	20.567	0.456097	0.430536	1.05937	0.289432	na	20.567	1.10549	0.740787
NITMOv2_RS18465	NZ_CP011801	3790603	3791781	-	1179	sensor histidine kinase	336.513	393.999	256.348	344.63	332.977	541.036	338.046	273.347	361.757	NITMOv2_4018	-	putative Histidine kinase	353.184	81.9813	3.61796	0.839803	1.85518	663	22.3477	0.414614	0.370246	-0.0697629	0.385584	-0.484377	0.389056	1.91257	0.384318	0.856027	22.3477	0.414614	0.370246	1.11983	0.262784	0.818938	22.3477	-0.0697629	0.385584	-0.180928	0.856424	na	22.3477	0.344851	0.64819
NITMOv2_RS16630	NZ_CP011801	3412889	3413722	-	834	hypothetical protein	446.887	484.334	306.639	202.997	235.36	316.488	371.689	524.43	281.273	NITMOv2_3617	-	putative Nitrite oxidoreductase, membrane subunit	352.233	112.229	3.60822	1.14966	1.85129	664	15.5103	-0.608936	0.453517	-0.142405	0.433656	0.466531	0.473261	1.88869	0.388935	na	15.5103	-0.608936	0.453517	-1.3427	0.17937	na	15.5103	-0.142405	0.433656	-0.328382	0.742623	na	15.5103	-0.751341	0.750662
NITMOv2_RS19670	NZ_CP011801	4033921	4034526	-	606	hypothetical protein	178.555	466.591	287.732	474.932	226.738	290.375	255.766	531.809	457.48	NITMOv2_4282	-	conserved exported protein of unknown function	352.22	129.742	3.60808	1.32905	1.85123	665	11.3659	0.281671	0.538914	0.394625	0.534651	0.112953	0.545297	0.578468	0.748837	na	11.3659	0.281671	0.538914	0.522664	0.601208	na	11.3659	0.394625	0.534651	0.738097	0.460456	na	11.3659	0.676296	0.924777
NITMOv2_RS07610	NZ_CP011801	1553106	1553453	-	348	hypothetical protein	380.028	232.146	267.227	340.545	282.026	442.446	509.012	396.892	306.402	NITMOv2_1663	-	conserved protein of unknown function	350.747	89.6368	3.593	0.918225	1.84519	666	6.51947	0.34555	0.654564	0.357186	0.654434	0.0116361	0.666063	0.39063	0.822576	na	6.51947	0.34555	0.654564	0.527909	0.597563	na	6.51947	0.357186	0.654434	0.545794	0.585208	na	6.51947	0.702736	1.12687
NITMOv2_RS08775	NZ_CP011801	1793965	1794339	+	375	hypothetical protein	288.545	215.432	123.994	225.732	523.44	410.59	649.499	491.088	227.473	NITMOv2_1905	-	Pyruvateferredoxin oxidoreductase alpha subunit (fragment)	350.644	175.632	3.59194	1.79915	1.84476	667	6.9967	0.972627	0.68251	1.04214	0.679674	0.0695133	0.65682	2.86308	0.23894	na	6.9967	0.972627	0.68251	1.42507	0.154136	na	6.9967	1.04214	0.679674	1.53329	0.125203	na	6.9967	2.01477	1.19337
NITMOv2_RS16790	NZ_CP011801	3451671	3452654	-	984	methyltransferase domain-containing protein	354.328	246.301	271.708	292.489	458.808	290.596	405.037	444.487	390.102	NITMOv2_3654	-	putative O-methyltransferase, family 2	350.428	78.3746	3.58973	0.802857	1.84388	668	18.4152	0.343573	0.409124	0.409555	0.407263	0.0659816	0.413955	1.17292	0.556292	na	18.4152	0.343573	0.409124	0.839777	0.401033	na	18.4152	0.409555	0.407263	1.00563	0.314595	na	18.4152	0.753128	0.703657
NITMOv2_RS01110	NZ_CP011801	241954	242181	-	228	hypothetical protein	158.193	354.328	203.937	148.508	172.184	578.84	485.571	302.891	748.267	NITMOv2_0251	-	conserved exported protein of unknown function	350.302	212.703	3.58844	2.1789	1.84336	669	4.20459	0.439973	0.883109	1.10635	0.839515	0.66638	0.849693	1.79605	0.407374	na	4.20459	0.439973	0.883109	0.498209	0.618337	na	4.20459	1.10635	0.839515	1.31785	0.187555	na	4.20459	1.54633	1.49912
NITMOv2_RS04030	NZ_CP011801	822407	824749	+	2343	type I DNA topoisomerase	384.85	456.861	372.1	289.03	284.843	206.534	283.509	501.07	373.175	NITMOv2_0875	topA	DNA topoisomerase 1	350.219	93.1714	3.58759	0.954432	1.84301	670	43.5267	-0.503949	0.294089	-0.139267	0.28586	0.364681	0.305018	3.03993	0.21872	0.699872	43.5267	-0.503949	0.294089	-1.7136	0.0866031	0.587395	43.5267	-0.139267	0.28586	-0.487187	0.626126	0.859205	43.5267	-0.643216	0.493328
NITMOv2_RS15180	NZ_CP011801	3117066	3118082	-	1017	D-glycero-beta-D-manno-heptose-7-phosphate kinase	484.691	377.323	320.042	332.939	270.213	216.282	326.578	339.524	482.29	NITMOv2_3312	rfaEa	D-beta-D-heptose 7-phosphate kinase, domain I of bifunctional protein HldE	349.987	88.3757	3.58521	0.905307	1.84206	671	19.0106	-0.407112	0.413355	-0.117908	0.403049	0.289204	0.430868	1.00722	0.604344	na	19.0106	-0.407112	0.413355	-0.984897	0.324675	na	19.0106	-0.117908	0.403049	-0.292541	0.769873	na	19.0106	-0.525021	0.693524
NITMOv2_RS17975	NZ_CP011801	3703428	3704126	-	699	hypothetical protein	395.597	375.618	349.231	387.523	533.55	188.806	506.827	197.594	213.561	NITMOv2_3915	-	putative Secreted protein	349.812	127.601	3.58342	1.30712	1.84134	672	13.2084	0.114234	0.495774	-0.358565	0.515864	-0.4728	0.528745	0.859574	0.650648	na	13.2084	0.114234	0.495774	0.230417	0.817768	na	13.2084	-0.358565	0.515864	-0.695077	0.487007	na	13.2084	-0.244331	0.862695
NITMOv2_RS00695	NZ_CP011801	160426	161670	-	1245	NADH dehydrogenase (quinone) subunit D	309.017	486.668	252.095	299.163	346.858	247.344	284.556	406.774	513.87	NITMOv2_0164	nuoD	NADH-quinone oxidoreductase, subunit D	349.594	98.383	3.58118	1.00782	1.84044	673	23.1516	-0.0752386	0.388333	0.168978	0.381283	0.244217	0.397659	0.406164	0.816211	0.945512	23.1516	-0.0752386	0.388333	-0.193747	0.846374	0.980274	23.1516	0.168978	0.381283	0.443183	0.657633	na	23.1516	0.0937397	0.658959
NITMOv2_RS19765	NZ_CP011801	4053194	4053838	-	645	hypothetical protein	205.038	344.44	324.402	419.967	273.893	272.817	446.273	356.895	495.944	NITMOv2_4301	-	conserved exported protein of unknown function	348.852	92.8364	3.57359	0.951001	1.83737	674	12.0111	0.298812	0.503503	0.525653	0.494571	0.226841	0.505191	1.13649	0.56652	na	12.0111	0.298812	0.503503	0.593467	0.552869	na	12.0111	0.525653	0.494571	1.06285	0.287852	na	12.0111	0.824466	0.860822
NITMOv2_RS04750	NZ_CP011801	965054	965740	-	687	hypothetical protein	455.008	264.586	423.013	320.363	285.721	256.139	354.53	368.584	403.541	NITMOv2_1029	-	conserved protein of unknown function	347.943	71.2983	3.56427	0.730369	1.83361	675	12.7688	-0.320418	0.479544	-0.127734	0.471073	0.192684	0.502658	0.463608	0.793102	na	12.7688	-0.320418	0.479544	-0.668173	0.504023	na	12.7688	-0.127734	0.471073	-0.271155	0.786272	na	12.7688	-0.448152	0.806894
NITMOv2_RS18015	NZ_CP011801	3708948	3709310	-	363	hypothetical protein	331.204	556.383	544.393	233.195	486.67	424.164	60.9973	253.661	234.993	NITMOv2_3924	-	conserved exported protein of unknown function	347.295	167.527	3.55764	1.71612	1.83092	676	6.77024	-0.219793	0.62564	-1.44192	0.724152	-1.22213	0.75188	4.39535	0.111061	na	6.77024	-0.219793	0.62564	-0.351309	0.725356	na	6.77024	-1.44192	0.724152	-1.99119	0.04646	na	6.77024	-1.66172	1.12531
NITMOv2_RS04845	NZ_CP011801	991769	992002	+	234	hypothetical protein	154.137	345.243	248.384	217.05	167.769	281.999	662.368	590.249	455.675	NITMOv2_1049	-	conserved protein of unknown function	346.986	183.915	3.55447	1.88399	1.82963	677	4.24471	-0.0141079	0.87483	1.16776	0.787762	1.18187	0.840762	2.98046	0.225321	na	4.24471	-0.0141079	0.87483	-0.0161265	0.987134	na	4.24471	1.16776	0.787762	1.48238	0.138239	na	4.24471	1.15366	1.43698
NITMOv2_RS17100	NZ_CP011801	3517153	3518070	-	918	hypothetical protein	353.609	242.009	291.243	258.191	342.118	335.45	482.397	376.139	441.38	NITMOv2_3721	-	putative Phosphate-binding protein PstS	346.948	79.3008	3.55408	0.812345	1.82948	678	16.9527	0.151585	0.423807	0.456501	0.413343	0.304916	0.427238	1.26305	0.531779	na	16.9527	0.151585	0.423807	0.357674	0.720587	na	16.9527	0.456501	0.413343	1.10441	0.269415	na	16.9527	0.608086	0.719999
NITMOv2_RS01635	NZ_CP011801	345612	346883	+	1272	VCBS repeat-containing protein	425.331	317.558	484.35	266.194	277.769	397.725	330.738	289.556	318.543	NITMOv2_0365	-	conserved protein of unknown function	345.307	74.2558	3.53727	0.760664	1.82264	679	23.4749	-0.31227	0.36045	-0.481193	0.366609	-0.168923	0.386997	1.8801	0.390607	0.858236	23.4749	-0.31227	0.36045	-0.866333	0.386308	0.890601	23.4749	-0.481193	0.366609	-1.31255	0.189334	na	23.4749	-0.793463	0.615537
NITMOv2_RS06685	NZ_CP011801	1365780	1366178	+	399	hypothetical protein	421.849	404.947	378.74	339.447	393.564	385.893	610.432	57.6936	106.895	NITMOv2_1453	-	conserved protein of unknown function	344.384	167.477	3.52782	1.71561	1.81878	680	7.41953	-0.00429556	0.645685	-0.702665	0.688673	-0.698369	0.70944	1.28324	0.526439	na	7.41953	-0.00429556	0.645685	-0.00665272	0.994692	na	7.41953	-0.702665	0.688673	-1.02032	0.307578	na	7.41953	-0.706961	1.13095
NITMOv2_RS20895	NZ_CP011801	4293085	4294098	-	1014	TonB family protein	213.421	418.275	332.453	350.62	309.728	260.307	524.071	454.038	231.343	NITMOv2_4545	-	conserved exported protein of unknown function	343.806	104.97	3.52189	1.07529	1.81635	681	18.5265	0.0886873	0.427621	0.27822	0.421695	0.189533	0.435515	0.452419	0.797551	na	18.5265	0.0886873	0.427621	0.207397	0.8357	na	18.5265	0.27822	0.421695	0.659766	0.509404	na	18.5265	0.366907	0.729177
NITMOv2_RS01880	NZ_CP011801	390687	391118	+	432	hypothetical protein	389.624	280.51	376.716	391.896	272.625	407.332	307.528	319.718	345.554	NITMOv2_0416	-	conserved protein of unknown function	343.5	50.6239	3.51876	0.518583	1.81507	682	7.97054	0.118883	0.577119	-0.20372	0.596313	-0.322603	0.615239	0.281608	0.86866	na	7.97054	0.118883	0.577119	0.205994	0.836796	na	7.97054	-0.20372	0.596313	-0.341633	0.732627	na	7.97054	-0.0848371	0.999395
NITMOv2_RS14880	NZ_CP011801	3051735	3052886	-	1152	aminopeptidase P family protein	271.346	368.169	292.628	279.226	340.781	458.248	480.513	339.701	259.165	NITMOv2_3249	pepP	Xaa-Pro aminopeptidase	343.309	80.3176	3.5168	0.82276	1.81426	683	21.0933	0.318761	0.384643	0.15523	0.390045	-0.163531	0.396452	0.692051	0.707495	na	21.0933	0.318761	0.384643	0.82872	0.407263	na	21.0933	0.15523	0.390045	0.39798	0.690645	na	21.0933	0.473992	0.665579
NITMOv2_RS06390	NZ_CP011801	1300624	1302867	-	2244	hypothetical protein	466.121	333.012	248.65	316.87	262.42	362.678	315.751	379.559	399.142	NITMOv2_1387	-	Putative Histidine kinase, contains GAF domain (fragment)	342.689	67.9647	3.51045	0.69622	1.81166	684	41.0799	-0.0577372	0.309087	-0.0200008	0.308471	0.0377365	0.318959	0.0358053	0.982257	0.992864	41.0799	-0.0577372	0.309087	-0.186799	0.851818	0.980274	41.0799	-0.0200008	0.308471	-0.0648385	0.948303	0.986747	41.0799	-0.077738	0.528813
NITMOv2_RS22295	NZ_CP011801	4588465	4588782	+	318	hypothetical protein	226.843	317.558	219.328	159.716	61.7265	207.509	557.032	796.28	536.493	NITMOv2_4864	-	conserved exported protein of unknown function	342.498	236.962	3.5085	2.42741	1.81085	685	5.63631	-0.702481	0.825118	1.25658	0.678473	1.95906	0.796416	7.38829	0.0248688	na	5.63631	-0.702481	0.825118	-0.85137	0.394564	na	5.63631	1.25658	0.678473	1.85207	0.0640164	na	5.63631	0.554096	1.28375
NITMOv2_RS07965	NZ_CP011801	1622914	1623240	-	327	(2Fe-2S) ferredoxin domain-containing protein	257.367	432.346	213.292	414.188	420.193	134.532	406.276	281.587	521.727	NITMOv2_1739	-	Ferredoxin, 2Fe-2s	342.39	125.669	3.50738	1.28733	1.81039	686	6.0056	0.299732	0.705381	0.409985	0.699413	0.110254	0.713986	0.36912	0.83147	na	6.0056	0.299732	0.705381	0.424922	0.670894	na	6.0056	0.409985	0.699413	0.586185	0.557751	na	6.0056	0.709717	1.20984
NITMOv2_RS15245	NZ_CP011801	3133076	3134362	-	1287	dihydroorotase	383.008	235.393	307.094	473.564	366.042	307.635	309.679	465.045	231.98	NITMOv2_3326	pyrC	Dihydroorotase	342.16	87.7655	3.50503	0.899055	1.80943	687	23.7144	0.410085	0.376883	0.00783823	0.388502	-0.402247	0.391816	1.52074	0.467493	0.875147	23.7144	0.410085	0.376883	1.0881	0.276552	0.831599	23.7144	0.00783823	0.388502	0.0201755	0.983903	na	23.7144	0.417923	0.657594
NITMOv2_RS16620	NZ_CP011801	3411067	3412392	-	1326	hypothetical protein	353.609	365.551	298.061	280.889	281.26	331.763	417.459	347.206	402.066	NITMOv2_3615	-	putative Pentaheme cytochrome c	341.985	49.343	3.50324	0.505461	1.80869	688	24.1423	-0.0770318	0.354709	0.133076	0.348398	0.210108	0.365438	0.342372	0.842665	0.951857	24.1423	-0.0770318	0.354709	-0.217169	0.828077	0.980274	24.1423	0.133076	0.348398	0.381967	0.702486	na	24.1423	0.0560447	0.600712
NITMOv2_RS22275	NZ_CP011801	4584046	4584288	-	243	hypothetical protein	148.428	249.342	239.185	278.682	323.111	181.036	546.717	757.851	351.039	NITMOv2_4860	-	conserved protein of unknown function	341.71	194.237	3.50042	1.98973	1.80753	689	4.35866	0.447203	0.855507	1.31482	0.79876	0.86762	0.809336	2.90598	0.23387	na	4.35866	0.447203	0.855507	0.522735	0.601159	na	4.35866	1.31482	0.79876	1.64608	0.099747	na	4.35866	1.76203	1.44388
NITMOv2_RS08095	NZ_CP011801	1645526	1645807	-	282	hypothetical protein	255.802	358.098	123.664	360.211	139.213	0	314.071	979.563	529.359	NITMOv2_1765	-	putative Fe(2+)-trafficking protein YggX	339.998	286.381	3.48288	2.93364	1.80028	690	4.99897	-0.297974	0.895588	1.26858	0.79125	1.56656	0.863535	4.31479	0.115626	na	4.99897	-0.297974	0.895588	-0.332713	0.739351	na	4.99897	1.26858	0.79125	1.60326	0.108877	na	4.99897	0.970607	1.4528
NITMOv2_RS00075	NZ_CP011801	13989	16082	+	2094	sigma-54-dependent Fis family transcriptional regulator	367.456	443.672	394.141	315.314	271.844	294.119	327.795	318.802	325.893	NITMOv2_0015	-	Sigma-54 dependent transcriptional regulator	339.893	53.1388	3.48181	0.544346	1.79984	691	37.9974	-0.328508	0.286938	-0.373784	0.288398	-0.0452765	0.305177	2.11927	0.346583	0.816061	37.9974	-0.328508	0.286938	-1.14487	0.252262	0.818938	37.9974	-0.373784	0.288398	-1.29607	0.194951	0.601542	37.9974	-0.702292	0.48773
NITMOv2_RS03350	NZ_CP011801	691106	691684	+	579	ABC transporter substrate-binding protein	228.411	279.057	421.61	263.159	339.016	303.916	267.693	477.093	478.813	NITMOv2_0724	-	putative ABC transporter, auxiliary component, ATP-dependent toluene efflux transporter	339.863	95.7377	3.4815	0.980722	1.79971	692	10.4448	0.0559883	0.535206	0.310156	0.523836	0.254168	0.545118	0.390491	0.822633	na	10.4448	0.0559883	0.535206	0.104611	0.916685	na	10.4448	0.310156	0.523836	0.592087	0.553792	na	10.4448	0.366145	0.908045
NITMOv2_RS03885	NZ_CP011801	791397	793250	+	1854	DNA primase	389.084	381.276	369.924	228.289	222.335	284.737	406.056	397.32	379.582	NITMOv2_0846	dnaG	DNA primase	339.845	73.8261	3.48132	0.756262	1.79963	693	33.3723	-0.533838	0.310832	-0.0229832	0.29645	0.510854	0.321935	3.53421	0.170827	0.681664	33.3723	-0.533838	0.310832	-1.71745	0.085897	0.587395	33.3723	-0.0229832	0.29645	-0.0775281	0.938203	0.986747	33.3723	-0.556821	0.515127
NITMOv2_RS21465	NZ_CP011801	4410165	4411301	+	1137	hypothetical protein	507.555	373.026	245.37	312.69	258.958	212.801	311.585	404.92	431.389	NITMOv2_4665	-	protein of unknown function	339.81	96.8162	3.48096	0.991769	1.79949	694	20.5979	-0.400239	0.412064	-0.0517444	0.400545	0.348495	0.426633	1.06544	0.587006	na	20.5979	-0.400239	0.412064	-0.971304	0.331397	na	20.5979	-0.0517444	0.400545	-0.129185	0.897211	na	20.5979	-0.451983	0.691701
NITMOv2_RS12505	NZ_CP011801	2550197	2551417	-	1221	hypothetical protein	600.643	496.234	542.662	180.253	273.295	414.337	199.478	188.532	157.191	NITMOv2_2702	-	putative Histidine kinase family	339.181	175.004	3.47451	1.79272	1.79681	695	22.1808	-0.852508	0.372965	-1.67431	0.411671	-0.821797	0.440095	18.2007	0.000111624	0.00580447	22.1808	-0.852508	0.372965	-2.28576	0.0222684	0.424299	22.1808	-1.67431	0.411671	-4.06709	4.76e-05	na	22.1808	-2.52681	0.650745
NITMOv2_RS05280	NZ_CP011801	1072889	1073992	+	1104	alanine dehydrogenase	315.814	311	357.998	276.031	337.818	378.553	421.18	312.768	328.383	NITMOv2_1139	ald	Alanine dehydrogenase	337.727	42.9435	3.45962	0.439906	1.79061	696	19.9105	0.100117	0.382275	0.0297545	0.385023	-0.0703621	0.39794	0.0710988	0.965075	na	19.9105	0.100117	0.382275	0.261897	0.793401	na	19.9105	0.0297545	0.385023	0.0772799	0.938401	na	19.9105	0.129871	0.656047
NITMOv2_RS20685	NZ_CP011801	4236890	4238071	-	1182	HEAT repeat domain-containing protein	345.831	239.217	383.546	315.109	348.739	334.963	318.455	428.455	324.755	NITMOv2_4498	-	conserved protein of unknown function	337.674	51.5765	3.45908	0.528341	1.79039	697	21.3292	0.12166	0.37518	0.0364359	0.378251	-0.0852242	0.389868	0.110586	0.946208	na	21.3292	0.12166	0.37518	0.324272	0.745732	na	21.3292	0.0364359	0.378251	0.0963275	0.92326	na	21.3292	0.158096	0.644724
NITMOv2_RS07720	NZ_CP011801	1572982	1574268	-	1287	serine--tRNA ligase	317.616	376.629	361.286	223.628	396.546	324.726	498.927	339.841	198.84	NITMOv2_1686	serS	Serine--tRNA ligase	337.56	89.7213	3.45791	0.91909	1.7899	698	23.1388	-0.0585943	0.383071	-0.0968096	0.384524	-0.0382153	0.399293	0.0651971	0.967927	0.992864	23.1388	-0.0585943	0.383071	-0.152959	0.87843	0.980274	23.1388	-0.0968096	0.384524	-0.251765	0.801223	na	23.1388	-0.155404	0.655568
NITMOv2_RS16980	NZ_CP011801	3496649	3497389	-	741	peptidoglycan-associated lipoprotein Pal	178.475	163.536	345.124	319.864	397.348	682.734	478.1	155.329	316.574	NITMOv2_3695	pal	Peptidoglycan-associated lipoprotein Pal (Modular protein)	337.454	170.324	3.45682	1.74477	1.78945	699	13.4772	1.07393	0.507463	0.372184	0.53176	-0.701748	0.515569	4.73813	0.0935681	na	13.4772	1.07393	0.507463	2.11628	0.0343214	na	13.4772	0.372184	0.53176	0.699909	0.483984	na	13.4772	1.44612	0.902643
NITMOv2_RS04400	NZ_CP011801	893479	894714	+	1236	multidrug ABC transporter substrate-binding protein	369.63	277.787	404.408	232.855	524.076	302.533	214.971	260.741	448.597	NITMOv2_0957	macB	fragment of macrolide transport protein (ABC superfamily, atp_bind (N-terminal), membrane (C-terminal)) (part 2)	337.289	105.656	3.45513	1.08232	1.78874	700	22.3947	0.0898929	0.399465	-0.271587	0.410668	-0.36148	0.420878	0.793857	0.672382	0.926213	22.3947	0.0898929	0.399465	0.225033	0.821953	0.980274	22.3947	-0.271587	0.410668	-0.661331	0.5084	na	22.3947	-0.181694	0.692316
NITMOv2_RS09455	NZ_CP011801	1916441	1916851	+	411	hypothetical protein	234.018	442.264	593.947	288.344	334.314	374.626	215.494	336.054	207.548	NITMOv2_2049	-	putative Murein lipoprotein (Modular protein)	336.29	124.004	3.4449	1.27027	1.78446	701	7.38394	-0.243073	0.609417	-0.818949	0.64882	-0.575876	0.680486	1.64666	0.438967	na	7.38394	-0.243073	0.609417	-0.398861	0.689996	na	7.38394	-0.818949	0.64882	-1.26221	0.206872	na	7.38394	-1.06202	1.05908
NITMOv2_RS14535	NZ_CP011801	2979856	2980050	-	195	hypothetical protein	123.31	207.146	59.6123	434.101	704.631	225.599	454.195	708.299	109.362	NITMOv2_3171	-	conserved protein of unknown function	336.251	249.968	3.4445	2.56063	1.78429	702	3.51756	2.02967	1.01873	1.70512	1.03769	-0.324556	0.903572	4.39169	0.111265	na	3.51756	2.02967	1.01873	1.99235	0.0463322	na	3.51756	1.70512	1.03769	1.64319	0.100343	na	3.51756	3.73479	1.84737
NITMOv2_RS16545	NZ_CP011801	3395920	3396237	+	318	tetratricopeptide repeat protein	340.265	254.047	182.773	372.671	185.179	138.339	557.032	723.891	268.247	NITMOv2_3600	-	conserved protein of unknown function	335.827	192.769	3.44016	1.97469	1.78248	703	5.6307	-0.00673221	0.765986	0.900517	0.710768	0.907249	0.750052	2.14592	0.341994	na	5.6307	-0.00673221	0.765986	-0.00878894	0.992988	na	5.6307	0.900517	0.710768	1.26696	0.205169	na	5.6307	0.893785	1.27329
NITMOv2_RS00840	NZ_CP011801	191106	191738	-	633	ATP-dependent Clp endopeptidase proteolytic subunit ClpP	398.857	223.344	330.551	187.219	620.19	312.738	384.774	327.295	235.828	NITMOv2_0194	clpP	ATP-dependent Clp protease, proteolytic subunit clpP	335.644	128.744	3.43828	1.31884	1.78169	704	11.4045	0.291965	0.526381	-0.118865	0.544534	-0.41083	0.553303	0.600586	0.740601	na	11.4045	0.291965	0.526381	0.554665	0.579124	na	11.4045	-0.118865	0.544534	-0.218287	0.827205	na	11.4045	0.173101	0.917084
NITMOv2_RS09725	NZ_CP011801	1973469	1973912	+	444	type II secretion system protein GspG	297.86	181.952	366.535	266.913	265.257	346.782	398.955	414.77	480.306	NITMOv2_2107	gspG	General secretion pathway protein G	335.481	91.516	3.43662	0.937476	1.78099	705	7.91273	0.107678	0.605928	0.495392	0.585789	0.387714	0.60934	0.785172	0.675308	na	7.91273	0.107678	0.605928	0.177707	0.858953	na	7.91273	0.495392	0.585789	0.845682	0.39773	na	7.91273	0.603069	1.02435
NITMOv2_RS16230	NZ_CP011801	3336517	3337347	-	831	DUF1009 domain-containing protein	347.226	291.649	377.688	264.848	141.726	476.446	399.675	360.116	359.276	NITMOv2_3535	-	conserved protein of unknown function	335.406	94.5619	3.43584	0.968677	1.78066	706	14.8022	-0.137431	0.463607	0.0491279	0.456567	0.186559	0.479398	0.162673	0.921883	na	14.8022	-0.137431	0.463607	-0.29644	0.766894	na	14.8022	0.0491279	0.456567	0.107603	0.914311	na	14.8022	-0.0883035	0.78546
NITMOv2_RS01460	NZ_CP011801	311573	311767	-	195	50S ribosomal protein L35	184.965	310.719	476.898	260.46	201.323	563.998	227.098	354.15	437.448	NITMOv2_0327	rpmI	50S ribosomal subunit protein L35	335.229	133.044	3.43403	1.36288	1.7799	707	3.47538	0.145863	0.887299	-0.00835897	0.901181	-0.154222	0.929399	0.0361396	0.982092	na	3.47538	0.145863	0.887299	0.164389	0.869425	na	3.47538	-0.00835897	0.901181	-0.00927557	0.992599	na	3.47538	0.137504	1.52809
NITMOv2_RS01025	NZ_CP011801	229204	229983	-	780	enoyl-ACP reductase	184.965	310.719	163.934	368.986	427.812	366.598	454.195	383.662	355.427	NITMOv2_0232	fabI	Enoyl-[acyl-carrier-protein] reductase [NADH] FabI	335.144	100.077	3.43316	1.02518	1.77954	708	13.9964	0.983978	0.468035	0.836476	0.473446	-0.147503	0.457477	5.00298	0.0819626	na	13.9964	0.983978	0.468035	2.10236	0.0355218	na	13.9964	0.836476	0.473446	1.76678	0.0772647	na	13.9964	1.82045	0.822879
NITMOv2_RS16580	NZ_CP011801	3400441	3401199	+	759	DUF192 domain-containing protein	427.685	319.316	321.624	245.361	232.755	463.682	320.899	424.606	252.873	NITMOv2_3607	-	protein of unknown function	334.311	85.9013	3.42463	0.87996	1.77595	709	13.5028	-0.115351	0.469017	-0.195174	0.472909	-0.0798235	0.495027	0.176923	0.915338	na	13.5028	-0.115351	0.469017	-0.245942	0.805727	na	13.5028	-0.195174	0.472909	-0.41271	0.679819	na	13.5028	-0.310525	0.801367
NITMOv2_RS02130	NZ_CP011801	434170	435012	+	843	hypothetical protein	313.76	335.414	358.522	200.83	349.271	260.924	393.986	464.218	328.865	NITMOv2_0468	-	putative Daunorubicin resistance ABC transporter, membrane protein	333.976	74.9183	3.4212	0.767451	1.7745	710	14.9103	-0.216531	0.447432	0.155038	0.432443	0.371568	0.460112	0.655578	0.720515	na	14.9103	-0.216531	0.447432	-0.483941	0.628428	na	14.9103	0.155038	0.432443	0.358515	0.719958	na	14.9103	-0.061493	0.750134
NITMOv2_RS20595	NZ_CP011801	4221177	4222154	-	978	tRNA pseudouridine(55) synthase TruB	196.69	495.625	261.489	276.972	120.423	314.87	520.722	447.214	370.69	NITMOv2_4480	truB	tRNA pseudouridine synthase B	333.855	136.242	3.41996	1.39565	1.77398	711	17.1872	-0.256707	0.466283	0.471464	0.441198	0.728171	0.468617	2.58734	0.274263	na	17.1872	-0.256707	0.466283	-0.550539	0.58195	na	17.1872	0.471464	0.441198	1.0686	0.28525	na	17.1872	0.214757	0.777527
NITMOv2_RS03525	NZ_CP011801	728427	728627	+	201	hypothetical protein	418.701	200.962	404.83	252.685	292.97	437.73	220.319	458.104	318.293	na	-	na	333.844	98.436	3.41984	1.00836	1.77393	712	3.57902	-0.0238235	0.858774	-0.172483	0.872655	-0.148659	0.911343	0.0459788	0.977273	na	3.57902	-0.0238235	0.858774	-0.0277413	0.977868	na	3.57902	-0.172483	0.872655	-0.197653	0.843316	na	3.57902	-0.196306	1.47224
NITMOv2_RS03345	NZ_CP011801	690567	691010	+	444	outer membrane lipid asymmetry maintenance protein MlaD	135.391	136.464	314.173	266.913	309.466	544.944	398.955	311.077	576.368	NITMOv2_0723	yrbD	putative ABC transporter, periplasmic binding component, ATP-dependent toluene efflux transporter	332.639	154.891	3.4075	1.58667	1.76871	713	7.8715	0.973673	0.6392	1.0288	0.637164	0.0551227	0.615685	3.2424	0.197661	na	7.8715	0.973673	0.6392	1.52327	0.127692	na	7.8715	1.0288	0.637164	1.61465	0.106387	na	7.8715	2.00247	1.11805
NITMOv2_RS09475	NZ_CP011801	1919104	1919673	-	570	16S rRNA (guanine(966)-N(2))-methyltransferase RsmD	232.017	212.597	326.299	267.315	275.495	270.125	466.148	484.626	448.96	NITMOv2_2053	-	putative Ribosomal RNA small subunit methyltransferase D	331.509	106.336	3.39592	1.08929	1.7638	714	9.99907	0.162658	0.547523	0.761436	0.520215	0.598778	0.540149	2.38995	0.302711	na	9.99907	0.162658	0.547523	0.29708	0.766406	na	9.99907	0.761436	0.520215	1.4637	0.143277	na	9.99907	0.924094	0.921439
NITMOv2_RS03375	NZ_CP011801	696807	697823	+	1017	adenosyl-hopene transferase HpnH	212.791	258.168	240.032	382.879	366.717	259.539	457.21	407.429	398.413	NITMOv2_0728	-	Radical SAM protein	331.464	88.6988	3.39547	0.908616	1.76361	715	18.0155	0.640441	0.413485	0.764955	0.40986	0.124514	0.407302	3.95664	0.138302	na	18.0155	0.640441	0.413485	1.54888	0.12141	na	18.0155	0.764955	0.40986	1.86638	0.0619883	na	18.0155	1.4054	0.715553
NITMOv2_RS00690	NZ_CP011801	157620	160325	-	2706	hypothetical protein	337.666	417.966	373.733	331.591	239.378	341.4	310.937	306.249	323.115	NITMOv2_0163	-	putative NADH-quinone oxidoreductase, subunit G	331.337	48.7506	3.39417	0.499393	1.76306	716	47.9131	-0.18819	0.265482	-0.327669	0.268796	-0.139479	0.280718	1.52915	0.465532	0.874976	47.9131	-0.18819	0.265482	-0.708859	0.478412	0.925151	47.9131	-0.327669	0.268796	-1.21902	0.222835	0.619675	47.9131	-0.515859	0.454601
NITMOv2_RS08430	NZ_CP011801	1718360	1719766	+	1407	cobyrinate a,c-diamide synthase	333.252	387.57	413.091	204.555	306.921	343.93	440.637	278.135	272.822	NITMOv2_1831	cbiA	Cobyrinic acid A,C-diamide synthase	331.213	74.899	3.39289	0.767254	1.76251	717	24.7946	-0.316261	0.359561	-0.263666	0.358159	0.0525949	0.379034	0.933466	0.627048	0.917781	24.7946	-0.316261	0.359561	-0.879575	0.379089	0.890601	24.7946	-0.263666	0.358159	-0.73617	0.461627	0.792845	24.7946	-0.579927	0.609472
NITMOv2_RS20475	NZ_CP011801	4196845	4197123	+	279	DNA-binding response regulator	474.013	434.338	291.651	303.404	140.71	788.384	158.724	82.508	305.743	NITMOv2_4457	-	Transcriptional regulator, LuxR family	331.053	215.324	3.39125	2.20575	1.76182	718	4.98225	0.107467	0.751188	-1.18174	0.860756	-1.28921	0.879273	2.56922	0.276758	na	4.98225	0.107467	0.751188	0.143062	0.886241	na	4.98225	-1.18174	0.860756	-1.37291	0.169781	na	4.98225	-1.07427	1.35545
NITMOv2_RS11610	NZ_CP011801	2346442	2347743	+	1302	MFS transporter	350.893	310.241	357.124	377.087	256.293	253.409	357.129	371.286	343.961	NITMOv2_2513	-	putative Permease, MFS family	330.825	47.048	3.38892	0.481952	1.76082	719	23.0326	-0.0809326	0.36518	-0.0113561	0.363245	0.0695765	0.379796	0.0583432	0.97125	0.992864	23.0326	-0.0809326	0.36518	-0.221624	0.824607	0.980274	23.0326	-0.0113561	0.363245	-0.031263	0.97506	na	23.0326	-0.0922887	0.62158
NITMOv2_RS02795	NZ_CP011801	577235	577798	-	564	PilZ domain-containing protein	319.753	393.908	247.328	240.141	313.229	350.999	471.107	367.336	264.679	NITMOv2_0608	-	protein of unknown function	329.831	75.3263	3.37873	0.771631	1.75648	720	9.88827	0.0305875	0.539162	0.14652	0.533863	0.115933	0.556384	0.0845086	0.958626	na	9.88827	0.0305875	0.539162	0.0567315	0.954759	na	9.88827	0.14652	0.533863	0.274453	0.783736	na	9.88827	0.177108	0.917522
NITMOv2_RS11690	NZ_CP011801	2367273	2367491	+	219	hypothetical protein	274.491	276.667	371.556	154.611	268.891	401.752	505.526	420.452	292.131	NITMOv2_2529	-	conserved protein of unknown function	329.564	104.714	3.376	1.07267	1.75532	721	3.81107	-0.106724	0.859575	0.309007	0.826173	0.415732	0.876185	0.251506	0.881833	na	3.81107	-0.106724	0.859575	-0.124159	0.901189	na	3.81107	0.309007	0.826173	0.374023	0.708387	na	3.81107	0.202283	1.44054
NITMOv2_RS02135	NZ_CP011801	435009	435887	+	879	hypothetical protein	259.876	344.654	304.165	520.032	357.297	225.214	201.52	314.262	436.702	NITMOv2_0469	-	conserved protein of unknown function	329.303	101.102	3.37332	1.03567	1.75417	722	15.641	0.43543	0.453922	0.0125696	0.469292	-0.422861	0.472779	1.17008	0.557084	na	15.641	0.43543	0.453922	0.959262	0.337427	na	15.641	0.0125696	0.469292	0.0267843	0.978632	na	15.641	0.448	0.793121
NITMOv2_RS17285	NZ_CP011801	3558501	3559133	+	633	hypothetical protein	379.864	382.876	202.004	481.42	217.066	312.738	279.836	436.393	269.518	NITMOv2_3763	-	conserved exported protein of unknown function	329.079	96.9095	3.37104	0.992725	1.75319	723	11.1823	0.218059	0.52371	-0.035437	0.53539	-0.253497	0.54738	0.261424	0.877471	na	11.1823	0.218059	0.52371	0.416375	0.677136	na	11.1823	-0.035437	0.53539	-0.0661892	0.947227	na	11.1823	0.182622	0.906754
NITMOv2_RS01820	NZ_CP011801	376451	378379	+	1929	radical SAM protein	504.841	387.392	337.463	324.732	244.218	239.458	264.005	238.67	420.1	NITMOv2_0404	-	Radical SAM (modular protein)	328.986	93.7472	3.37008	0.960331	1.75278	724	34.0275	-0.489624	0.334566	-0.487132	0.334738	0.00249199	0.353806	3.02814	0.220013	0.699872	34.0275	-0.489624	0.334566	-1.46346	0.143342	0.677738	34.0275	-0.487132	0.334738	-1.45526	0.145597	0.583903	34.0275	-0.976755	0.568146
NITMOv2_RS16670	NZ_CP011801	3421681	3422283	-	603	hypothetical protein	518.392	602.887	404.83	84.2285	97.6568	328.297	330.478	267.227	318.293	NITMOv2_3626	napG	Ferredoxin-type protein NapG	328.032	171.023	3.36031	1.75193	1.74859	725	10.4219	-1.52494	0.580552	-0.793027	0.53197	0.73191	0.622627	7.48924	0.0236446	na	10.4219	-1.52494	0.580552	-2.6267	0.00862166	na	10.4219	-0.793027	0.53197	-1.49073	0.136031	na	10.4219	-2.31796	0.923256
NITMOv2_RS15170	NZ_CP011801	3114622	3116223	-	1602	CTP synthase	330.211	516.895	370.065	232.496	220.551	164.763	359.359	474.189	279.549	NITMOv2_3310	pyrG	CTP synthetase	327.564	116.977	3.35551	1.19829	1.74653	726	27.6896	-0.828416	0.359055	-0.187089	0.33857	0.641327	0.373406	5.59682	0.0609069	0.491456	27.6896	-0.828416	0.359055	-2.30721	0.0210429	0.424299	27.6896	-0.187089	0.33857	-0.552586	0.580547	0.832844	27.6896	-1.01551	0.589634
NITMOv2_RS19215	NZ_CP011801	3950292	3951101	+	810	ATP-dependent sacrificial sulfur transferase LarE	296.857	349.079	315.724	188.11	290.8	380.176	546.717	369.452	210.623	NITMOv2_4178	-	conserved protein of unknown function	327.504	105.22	3.3549	1.07786	1.74627	727	14.0543	-0.0741365	0.47579	0.158387	0.466797	0.232523	0.488715	0.240849	0.886544	na	14.0543	-0.0741365	0.47579	-0.155818	0.876177	na	14.0543	0.158387	0.466797	0.339305	0.73438	na	14.0543	0.0842504	0.806045
NITMOv2_RS22715	NZ_CP011801	2143615	2143989	-	375	LysM peptidoglycan-binding domain-containing protein	224.424	430.863	185.99	90.2929	418.752	234.623	472.363	491.088	398.078	na	-	na	327.386	144.603	3.35369	1.48129	1.74575	728	6.45106	-0.0349268	0.709498	0.681899	0.667949	0.716826	0.704373	1.43409	0.488193	na	6.45106	-0.0349268	0.709498	-0.0492275	0.960738	na	6.45106	0.681899	0.667949	1.02089	0.307309	na	6.45106	0.646972	1.18446
NITMOv2_RS16675	NZ_CP011801	3422299	3423297	-	999	hypothetical protein	324.938	242.603	442.169	321.991	235.784	154.125	332.463	460.855	426.939	NITMOv2_3627	-	conserved protein of unknown function	326.874	104.017	3.34845	1.06554	1.74349	729	17.3473	-0.390582	0.441529	0.168586	0.421169	0.559168	0.451684	1.60437	0.448349	na	17.3473	-0.390582	0.441529	-0.884611	0.376366	na	17.3473	0.168586	0.421169	0.400281	0.68895	na	17.3473	-0.221996	0.735285
NITMOv2_RS00115	NZ_CP011801	25927	26202	+	276	hypothetical protein	174.242	219.53	463.291	122.681	426.718	637.563	481.348	333.619	77.2667	NITMOv2_0023	-	conserved protein of unknown function	326.251	189.68	3.34206	1.94305	1.74074	730	4.79258	0.501483	0.802495	-0.0509003	0.839523	-0.552383	0.842452	0.557862	0.756592	na	4.79258	0.501483	0.802495	0.624905	0.532033	na	4.79258	-0.0509003	0.839523	-0.06063	0.951654	na	4.79258	0.450583	1.40992
NITMOv2_RS11435	NZ_CP011801	2304115	2306034	+	1920	molecular chaperone DnaK	313.091	368.169	193.74	352.707	613.407	274.949	265.243	287.747	266.57	NITMOv2_2476	dnaK	chaperone Hsp70 in DNA biosynthesis/cell division	326.18	119.397	3.34134	1.22309	1.74043	731	33.8791	0.639335	0.345655	-0.148972	0.363203	-0.788307	0.361744	5.72203	0.0572106	0.478117	33.8791	0.639335	0.345655	1.84964	0.0643661	0.586672	33.8791	-0.148972	0.363203	-0.410162	0.681687	0.883669	33.8791	0.490363	0.60986
NITMOv2_RS21090	NZ_CP011801	4332704	4333687	+	984	hypothetical protein	293.237	389.977	248.082	326.899	359.067	223.536	360.033	467.881	260.068	NITMOv2_4586	-	conserved exported protein of unknown function	325.42	77.8326	3.33355	0.797305	1.73706	732	17.0648	0.116311	0.426521	0.167216	0.425028	0.0509051	0.438649	0.166509	0.920117	na	17.0648	0.116311	0.426521	0.272698	0.785085	na	17.0648	0.167216	0.425028	0.393424	0.694006	na	17.0648	0.283528	0.72988
NITMOv2_RS06700	NZ_CP011801	1366854	1367297	+	444	tetratricopeptide repeat protein	297.86	409.393	261.811	305.044	221.047	346.782	299.216	259.231	528.337	NITMOv2_1456	-	conserved exported protein of unknown function	325.413	93.4513	3.33348	0.9573	1.73703	733	7.70641	-0.0158181	0.61214	0.13277	0.604257	0.148588	0.632013	0.0700873	0.965563	na	7.70641	-0.0158181	0.61214	-0.0258406	0.979384	na	7.70641	0.13277	0.604257	0.219724	0.826086	na	7.70641	0.116952	1.03935
NITMOv2_RS02240	NZ_CP011801	453031	455460	+	2430	DNA translocase FtsK	291.909	365.702	363.561	278.682	185.789	380.176	309.806	369.452	368.591	NITMOv2_0490	ftsK	DNA translocase FtsK 2	323.741	64.1296	3.31635	0.656933	1.7296	734	41.7992	-0.170072	0.29464	-0.0305456	0.291716	0.139526	0.304794	0.365262	0.833075	0.951191	41.7992	-0.170072	0.29464	-0.577218	0.563792	0.925151	41.7992	-0.0305456	0.291716	-0.10471	0.916606	0.98299	41.7992	-0.200617	0.500921
NITMOv2_RS12105	NZ_CP011801	2448102	2451269	+	3168	CusA/CzcA family heavy metal efflux RND transporter	303.604	299.636	253.183	299.266	247.841	409.646	356.453	377.849	356.773	NITMOv2_2616	czcA	Cation efflux system protein CzcA	322.694	55.6592	3.30563	0.570163	1.72493	735	54.4888	0.259461	0.259746	0.276989	0.25959	0.0175283	0.264326	1.44072	0.486576	0.890325	54.4888	0.259461	0.259746	0.998903	0.317842	0.861737	54.4888	0.276989	0.25959	1.06703	0.28596	0.665118	54.4888	0.53645	0.447036
NITMOv2_RS09750	NZ_CP011801	1976752	1978332	+	1581	hypothetical protein	349.807	357.69	463.211	203.459	310.389	361.729	336.122	305.765	215.819	NITMOv2_2113	-	protein of unknown function	322.666	78.6497	3.30533	0.805675	1.7248	736	27.1853	-0.340487	0.342661	-0.534833	0.349144	-0.194346	0.368177	2.52724	0.282629	0.769013	27.1853	-0.340487	0.342661	-0.993658	0.32039	0.861737	27.1853	-0.534833	0.349144	-1.53184	0.125562	0.54316	27.1853	-0.87532	0.585731
NITMOv2_RS03320	NZ_CP011801	682093	685779	+	3687	chromosome segregation protein SMC	322.823	388.925	362.573	238.773	383.317	435.503	270.244	231.009	266.064	NITMOv2_0717	smc	Chromosome partition protein Smc	322.137	73.978	3.29992	0.757819	1.72243	737	63.6919	0.0717746	0.245841	-0.549805	0.257278	-0.62158	0.26296	6.52627	0.0382682	0.3655	63.6919	0.0717746	0.245841	0.291955	0.770321	0.980274	63.6919	-0.549805	0.257278	-2.13701	0.0325973	0.321794	63.6919	-0.47803	0.429082
NITMOv2_RS08140	NZ_CP011801	1652953	1653345	+	393	CBS domain-containing protein	214.145	565.302	384.522	172.315	149.84	335.815	563.41	292.872	217.054	NITMOv2_1775	-	conserved protein of unknown function	321.697	156.969	3.29541	1.60796	1.72046	738	6.65658	-0.697034	0.69568	-0.142955	0.658693	0.554079	0.725456	1.06182	0.588069	na	6.65658	-0.697034	0.69568	-1.00195	0.316369	na	6.65658	-0.142955	0.658693	-0.217028	0.828186	na	6.65658	-0.839989	1.14429
NITMOv2_RS08560	NZ_CP011801	1745230	1746486	-	1257	beta-ketoacyl-[acyl-carrier-protein] synthase II	315.632	289.213	332.918	269.37	265.468	279.98	546.064	256.385	339.309	NITMOv2_1857	fabF	3-oxoacyl-[acyl-carrier-protein] synthase 2	321.593	89.2849	3.29435	0.91462	1.71999	739	21.54	-0.103387	0.391545	0.207014	0.381951	0.310401	0.400415	0.634244	0.728242	na	21.54	-0.103387	0.391545	-0.26405	0.791742	na	21.54	0.207014	0.381951	0.54199	0.587825	na	21.54	0.103626	0.661858
NITMOv2_RS01105	NZ_CP011801	241307	241567	+	261	hypothetical protein	276.384	464.292	311.765	194.597	376.035	337.102	254.506	352.793	326.829	NITMOv2_0249	-	conserved protein of unknown function	321.589	76.9233	3.29431	0.787989	1.71998	740	4.46407	-0.0891193	0.771001	-0.210995	0.78162	-0.121875	0.820695	0.0731724	0.964075	na	4.46407	-0.0891193	0.771001	-0.115589	0.907978	na	4.46407	-0.210995	0.78162	-0.269945	0.787202	na	4.46407	-0.300114	1.31803
NITMOv2_RS02875	NZ_CP011801	595738	596682	+	945	UDP-N-acetylmuramate dehydrogenase	470.73	448.816	282.922	412.051	290.8	139.657	257.738	341.033	248.234	NITMOv2_0624	murB	UDP-N-acetylenolpyruvoylglucosamine reductase 2	321.331	107.233	3.29166	1.09848	1.71882	741	16.3215	-0.355757	0.451853	-0.57862	0.461257	-0.222863	0.485507	1.66933	0.434019	na	16.3215	-0.355757	0.451853	-0.787329	0.43109	na	16.3215	-0.57862	0.461257	-1.25444	0.209682	na	16.3215	-0.934377	0.773397
NITMOv2_RS13800	NZ_CP011801	2829563	2829913	-	351	hypothetical protein	376.78	460.324	397.415	192.934	447.385	250.666	315.413	327.916	121.513	NITMOv2_2995	-	exported protein of unknown function	321.15	114.868	3.2898	1.17669	1.718	742	6.01945	-0.361133	0.67133	-0.766585	0.702838	-0.405452	0.745024	1.22008	0.543329	na	6.01945	-0.361133	0.67133	-0.537936	0.590621	na	6.01945	-0.766585	0.702838	-1.0907	0.275405	na	6.01945	-1.12772	1.15511
NITMOv2_RS18885	NZ_CP011801	3882026	3882676	-	651	DNA-3-methyladenine glycosylase I	350.893	558.435	339.268	260.06	150.76	304.091	374.135	353.606	196.549	NITMOv2_4110	-	DNA-3-methyladenine glycosylase I	320.866	117.238	3.2869	1.20097	1.71673	743	11.0716	-0.666976	0.524855	-0.482543	0.515319	0.184433	0.56139	1.83159	0.400199	na	11.0716	-0.666976	0.524855	-1.27078	0.203807	na	11.0716	-0.482543	0.515319	-0.936397	0.349069	na	11.0716	-1.14952	0.875724
NITMOv2_RS07360	NZ_CP011801	1497607	1498980	+	1374	cobyrinate a,c-diamide synthase	288.755	279.285	287.649	160.181	385.723	464.251	467.335	335.076	217.291	NITMOv2_1604	cobB	Cobyrinic acid A,C-diamide synthase	320.616	104.182	3.28434	1.06722	1.7156	744	23.4406	0.308239	0.396818	0.171983	0.40077	-0.136256	0.406551	0.609324	0.737372	0.9321	23.4406	0.308239	0.396818	0.776778	0.43729	0.925151	23.4406	0.171983	0.40077	0.429132	0.667827	na	23.4406	0.480223	0.686206
NITMOv2_RS05750	NZ_CP011801	1162996	1163586	+	591	hypothetical protein	284.802	239.217	255.697	200.524	332.132	297.745	224.792	545.307	505.175	NITMOv2_1236	-	conserved exported protein of unknown function	320.599	122.949	3.28416	1.25947	1.71553	745	10.0218	0.171732	0.556282	0.619258	0.536367	0.447527	0.554413	1.42479	0.490467	na	10.0218	0.171732	0.556282	0.308713	0.75754	na	10.0218	0.619258	0.536367	1.15454	0.248278	na	10.0218	0.79099	0.941755
NITMOv2_RS01780	NZ_CP011801	368971	369576	-	606	2,3-bisphosphoglycerate-dependent phosphoglycerate mutase	277.752	199.967	364.461	446.995	161.956	326.672	292.304	531.809	281.526	NITMOv2_0395	gpmA	2,3-bisphosphoglycerate-dependent phosphoglycerate mutase	320.382	115.341	3.28195	1.18154	1.71455	746	10.3653	0.248386	0.55072	0.273097	0.550035	0.0247106	0.56223	0.306594	0.857875	na	10.3653	0.248386	0.55072	0.451021	0.651974	na	10.3653	0.273097	0.550035	0.496508	0.619536	na	10.3653	0.521483	0.94634
NITMOv2_RS08000	NZ_CP011801	1626885	1627193	+	309	thiamine-binding protein	350.176	0	188.097	383.526	317.622	213.553	501.599	372.488	552.119	NITMOv2_1746	-	conserved protein of unknown function	319.909	167.963	3.27709	1.72059	1.71242	747	5.29622	0.765655	0.796491	1.20539	0.773436	0.439733	0.75988	2.49515	0.287201	na	5.29622	0.765655	0.796491	0.961286	0.336408	na	5.29622	1.20539	0.773436	1.55848	0.119118	na	5.29622	1.97104	1.37397
NITMOv2_RS02265	NZ_CP011801	460141	461523	-	1383	radical SAM protein	304.262	350.485	336.208	306.036	212.896	270.376	400.253	399.475	292.976	NITMOv2_0497	-	putative Radical SAM superfamily protein, Coenzyme PQQ synthesis protein E	319.219	60.26	3.27003	0.617293	1.7093	748	23.4635	-0.205159	0.363352	0.068029	0.354807	0.273188	0.375435	0.572444	0.751096	0.9321	23.4635	-0.205159	0.363352	-0.56463	0.572325	0.925151	23.4635	0.068029	0.354807	0.191735	0.84795	na	23.4635	-0.13713	0.612269
NITMOv2_RS10610	NZ_CP011801	2146541	2147815	-	1275	HlyC/CorC family transporter	339.464	396.014	392.038	199.176	277.115	189.769	277.861	415.258	384.697	NITMOv2_2300	-	conserved membrane protein of unknown function	319.044	86.4376	3.26823	0.885452	1.70851	749	21.5331	-0.643979	0.384079	-0.136985	0.365633	0.506995	0.400551	2.99103	0.224133	na	21.5331	-0.643979	0.384079	-1.67668	0.0936043	na	21.5331	-0.136985	0.365633	-0.374651	0.70792	na	21.5331	-0.780964	0.634009
NITMOv2_RS02345	NZ_CP011801	482736	485405	-	2670	PAS domain S-box protein	297.19	279.88	444.078	355.085	301.419	378.956	298.544	284.513	231.626	NITMOv2_0513	-	protein of unknown function	319.032	63.3427	3.26812	0.648872	1.70846	750	45.7794	0.112946	0.279142	-0.417398	0.290755	-0.530344	0.297257	3.47703	0.175781	0.681664	45.7794	0.112946	0.279142	0.404617	0.685759	0.954332	45.7794	-0.417398	0.290755	-1.43557	0.151126	0.5869	45.7794	-0.304452	0.48637
NITMOv2_RS15930	NZ_CP011801	3271247	3272272	-	1026	PIN domain-containing protein	199.207	236.219	328.565	330.018	286.974	343.016	410.037	381.418	353.348	NITMOv2_3471	-	conserved membrane protein of unknown function	318.756	67.4367	3.26528	0.690811	1.70721	751	17.4411	0.429044	0.415771	0.499176	0.413731	0.0701324	0.418074	1.71051	0.425176	na	17.4411	0.429044	0.415771	1.03192	0.302108	na	17.4411	0.499176	0.413731	1.20652	0.227615	na	17.4411	0.928221	0.716444
NITMOv2_RS06215	NZ_CP011801	1261843	1263399	+	1557	glutamine-hydrolyzing GMP synthase	270.26	376.175	321.033	456.684	252.139	254.288	341.303	251.339	342.415	NITMOv2_1344	guaA	GMP synthetase (glutamine aminotransferase)	318.404	69.7174	3.26168	0.714174	1.70561	752	26.6763	0.146032	0.359424	-0.101622	0.366499	-0.247654	0.375252	0.444879	0.800564	0.937301	26.6763	0.146032	0.359424	0.406295	0.684526	0.954332	26.6763	-0.101622	0.366499	-0.277278	0.781567	0.934482	26.6763	0.0444099	0.62145
NITMOv2_RS14545	NZ_CP011801	2980746	2981189	-	444	hypothetical protein	297.86	181.952	287.992	266.913	221.047	495.403	349.086	570.309	192.123	NITMOv2_3173	-	conserved protein of unknown function	318.076	134.056	3.25832	1.37325	1.70413	753	7.49063	0.401605	0.632957	0.404835	0.633266	0.00323033	0.64102	0.547262	0.760613	na	7.49063	0.401605	0.632957	0.63449	0.525761	na	7.49063	0.404835	0.633266	0.639282	0.52264	na	7.49063	0.80644	1.09198
NITMOv2_RS04420	NZ_CP011801	897902	898342	-	441	division/cell wall cluster transcriptional repressor MraZ	190.836	366.38	237.233	268.729	445.102	99.7547	301.252	469.79	483.574	NITMOv2_0961	mraZ	Protein MraZ	318.072	133.221	3.25828	1.3647	1.70411	754	7.44829	0.214223	0.65295	0.630364	0.631818	0.416141	0.650252	1.03166	0.597004	na	7.44829	0.214223	0.65295	0.328086	0.742847	na	7.44829	0.630364	0.631818	0.997699	0.318425	na	7.44829	0.844588	1.10826
NITMOv2_RS15160	NZ_CP011801	3112721	3113749	-	1029	KpsF/GutQ family sugar-phosphate isomerase	257.045	471.06	282.42	213.886	343.365	256.512	430.36	335.565	269.42	NITMOv2_3308	kdsD	D-arabinose 5-phosphate isomerase	317.737	85.8527	3.25485	0.879461	1.70259	755	17.3561	-0.169273	0.428308	0.000728924	0.422309	0.170002	0.444369	0.19973	0.90496	na	17.3561	-0.169273	0.428308	-0.395212	0.692686	na	17.3561	0.000728924	0.422309	0.00172605	0.998623	na	17.3561	-0.168544	0.725342
NITMOv2_RS02890	NZ_CP011801	598636	599868	+	1233	cell division protein FtsA	253.52	212.942	292.26	398.19	318.394	285.429	251.41	429.403	415.097	NITMOv2_0627	ftsA	ATP-binding cell division protein involved in recruitment of FtsK to Z ring	317.405	78.7546	3.25144	0.806749	1.70108	756	20.9709	0.505734	0.389453	0.434121	0.39183	-0.0716127	0.393357	1.97232	0.373006	na	20.9709	0.505734	0.389453	1.29857	0.194091	na	20.9709	0.434121	0.39183	1.10793	0.267891	na	20.9709	0.939855	0.67504
NITMOv2_RS16235	NZ_CP011801	3337360	3338172	-	813	acyl-ACP--UDP-N-acetylglucosamine O-acyltransferase	325.337	248.422	386.05	270.712	289.727	405.829	299.585	198.202	419.692	NITMOv2_3536	lpxA	UDP-N-acetylglucosamine acetyltransferase	315.951	75.224	3.23655	0.770583	1.69446	757	13.7738	0.077113	0.463301	-0.151825	0.473253	-0.228938	0.48853	0.227957	0.892277	na	13.7738	0.077113	0.463301	0.166443	0.867809	na	13.7738	-0.151825	0.473253	-0.320812	0.748353	na	13.7738	-0.0747121	0.799106
NITMOv2_RS17780	NZ_CP011801	3654661	3655335	-	675	hypothetical protein	409.662	448.816	482.197	250.814	261.72	130.346	393.636	238.723	221.154	NITMOv2_3875	-	conserved protein of unknown function	315.23	120.772	3.22916	1.23717	1.69116	758	11.3456	-0.925133	0.517175	-0.724662	0.506133	0.200471	0.560919	3.94224	0.139301	na	11.3456	-0.925133	0.517175	-1.78882	0.0736436	na	11.3456	-0.724662	0.506133	-1.43176	0.152212	na	11.3456	-1.6498	0.85595
NITMOv2_RS08410	NZ_CP011801	1713058	1713930	+	873	cobalamin-binding protein	413.151	323.888	332.886	271.499	179.876	277.153	405.81	263.685	366.419	NITMOv2_1827	-	putative Vitamin B12 import system, periplasmic binding protein BtuF	314.93	75.1159	3.22609	0.769475	1.68979	759	14.6516	-0.455611	0.455833	-0.126844	0.441835	0.328767	0.476561	1.04026	0.594444	na	14.6516	-0.455611	0.455833	-0.999512	0.317547	na	14.6516	-0.126844	0.441835	-0.287086	0.774047	na	14.6516	-0.582455	0.76085
NITMOv2_RS18210	NZ_CP011801	3737563	3738060	+	498	DNA-binding response regulator	217.278	527.224	186.737	203.975	236.494	353.348	400.157	323.57	385.402	NITMOv2_3967	-	protein of unknown function	314.909	113.623	3.22588	1.16394	1.68969	760	8.29343	-0.064573	0.611985	0.261942	0.595034	0.326516	0.624854	0.327535	0.84894	na	8.29343	-0.064573	0.611985	-0.105514	0.915968	na	8.29343	0.261942	0.595034	0.440214	0.659782	na	8.29343	0.197369	1.03283
NITMOv2_RS15175	NZ_CP011801	3116273	3117073	-	801	3-deoxy-manno-octulosonate cytidylyltransferase	375.24	252.144	174.148	274.768	269.562	494.29	304.073	316.126	372.732	NITMOv2_3311	kdsB	3-deoxy-manno-octulosonate cytidylyltransferase	314.787	91.3102	3.22463	0.935367	1.68913	761	13.4949	0.447071	0.480884	0.226246	0.489661	-0.220825	0.493417	0.866463	0.648411	na	13.4949	0.447071	0.480884	0.929686	0.352534	na	13.4949	0.226246	0.489661	0.462046	0.644049	na	13.4949	0.673317	0.835807
NITMOv2_RS14540	NZ_CP011801	2980197	2980718	+	522	hypothetical protein	230.32	425.601	289.496	97.2984	338.431	379.24	381.759	440.991	245.122	NITMOv2_3172	-	conserved exported protein of unknown function	314.251	110.302	3.21914	1.12991	1.68667	762	8.64401	-0.114138	0.599514	0.131319	0.58705	0.245457	0.617324	0.162476	0.921974	na	8.64401	-0.114138	0.599514	-0.190384	0.849008	na	8.64401	0.131319	0.58705	0.223694	0.822996	na	8.64401	0.0171816	1.01341
NITMOv2_RS01645	NZ_CP011801	347168	347359	+	192	hypothetical protein	187.855	736.339	484.35	176.353	204.469	343.686	230.646	239.789	222.142	NITMOv2_0367	-	conserved protein of unknown function	313.959	185.748	3.21614	1.90278	1.68533	763	3.18966	-0.820615	0.935681	-1.03965	0.962479	-0.21903	1.05268	1.44008	0.486732	na	3.18966	-0.820615	0.935681	-0.877025	0.380473	na	3.18966	-1.03965	0.962479	-1.08017	0.280065	na	3.18966	-1.86026	1.57975
NITMOv2_RS15725	NZ_CP011801	3235217	3235576	-	360	septum formation initiator family protein	267.171	280.51	290.61	188.11	327.15	366.598	430.539	255.775	414.664	NITMOv2_3427	ftsB	Cell division protein FtsB homolog	313.459	78.8604	3.21102	0.807833	1.68303	764	6.00533	0.153355	0.682695	0.326227	0.672469	0.172872	0.695839	0.237026	0.88824	na	6.00533	0.153355	0.682695	0.224632	0.822266	na	6.00533	0.326227	0.672469	0.485118	0.627593	na	6.00533	0.479582	1.16292
NITMOv2_RS07775	NZ_CP011801	1584286	1584525	-	240	hypothetical protein	200.378	336.612	242.175	211.624	245.363	458.248	461.292	575.493	88.8567	NITMOv2_1697	-	conserved protein of unknown function	313.338	156.26	3.20978	1.60071	1.68248	765	3.96505	0.343606	0.861999	0.471885	0.853328	0.128279	0.868723	0.330509	0.847678	na	3.96505	0.343606	0.861999	0.398616	0.690176	na	3.96505	0.471885	0.853328	0.552993	0.580268	na	3.96505	0.815491	1.4791
NITMOv2_RS16300	NZ_CP011801	3351762	3353138	-	1377	Pup--protein ligase	279.395	484.017	371.44	147.537	285.098	271.554	401.997	384.498	185.844	NITMOv2_3549	pafA	Pup--protein ligase	312.376	107.74	3.19993	1.10367	1.67804	766	22.7147	-0.577204	0.397623	-0.280241	0.387891	0.296963	0.416389	2.12203	0.346105	0.816061	22.7147	-0.577204	0.397623	-1.45164	0.146602	0.677738	22.7147	-0.280241	0.387891	-0.722474	0.470003	na	22.7147	-0.857445	0.666143
NITMOv2_RS16255	NZ_CP011801	3340108	3342429	-	2322	outer membrane protein assembly factor BamA	352.086	234.846	265.329	255.188	177.523	217.875	371.894	525.429	404.103	NITMOv2_3540	-	putative Outer membrane protein assembly factor YaeT	311.586	110.414	3.19184	1.13106	1.67439	767	38.2096	-0.290878	0.318174	0.51091	0.300043	0.801788	0.31902	6.74147	0.0343643	0.351711	38.2096	-0.290878	0.318174	-0.914208	0.360608	0.890601	38.2096	0.51091	0.300043	1.70279	0.0886079	0.48724	38.2096	0.220033	0.529857
NITMOv2_RS00025	NZ_CP011801	7787	8356	+	570	hypothetical protein	253.109	566.925	469.054	59.4033	241.058	231.536	233.074	525.011	224.48	NITMOv2_0005	-	conserved protein of unknown function	311.517	168.706	3.19113	1.7282	1.67407	768	9.28314	-1.18492	0.62153	-0.45225	0.576305	0.732666	0.654417	3.70106	0.157154	na	9.28314	-1.18492	0.62153	-1.90645	0.056592	na	9.28314	-0.45225	0.576305	-0.784741	0.432606	na	9.28314	-1.63717	1.00429
NITMOv2_RS15385	NZ_CP011801	3158846	3160159	-	1314	glutamate-5-semialdehyde dehydrogenase	301.94	322.779	318.477	257.685	283.829	368.272	235.912	437.97	275.902	NITMOv2_3357	proA	Gamma-glutamyl phosphate reductase	311.418	61.3673	3.19012	0.628637	1.67361	769	21.7828	0.0440929	0.372012	-0.0726117	0.376167	-0.116705	0.38948	0.0914263	0.955316	0.992864	21.7828	0.0440929	0.372012	0.118525	0.905652	0.980274	21.7828	-0.0726117	0.376167	-0.193031	0.846935	na	21.7828	-0.0285188	0.638823
NITMOv2_RS18150	NZ_CP011801	3729093	3730271	-	1179	hypothetical protein	254.934	222.695	502.836	229.753	349.626	354.472	356.826	312.397	217.054	NITMOv2_3955	-	putative Sulfitecytochrome c oxidoreductase, subunit A	311.177	92.6368	3.18765	0.948957	1.67249	770	19.5931	-0.00517817	0.416166	-0.251487	0.424696	-0.246309	0.438457	0.439787	0.802604	na	19.5931	-0.00517817	0.416166	-0.0124426	0.990073	na	19.5931	-0.251487	0.424696	-0.592158	0.553745	na	19.5931	-0.256665	0.717549
NITMOv2_RS20545	NZ_CP011801	4209821	4210534	+	714	["pyridoxine 5'-phosphate synthase"]	319.932	198.007	260.491	213.402	192.441	308.066	217.079	612.57	477.885	NITMOv2_4470	pdxJ	pyridoxine 5'-phosphate synthase	311.097	144.311	3.18683	1.47829	1.67212	771	11.7018	-0.0611834	0.535122	0.63595	0.505999	0.697133	0.532896	2.26543	0.322158	na	11.7018	-0.0611834	0.535122	-0.114335	0.908972	na	11.7018	0.63595	0.505999	1.25682	0.208819	na	11.7018	0.574766	0.894877
NITMOv2_RS11070	NZ_CP011801	2229964	2230236	+	273	MoaD/ThiS family protein	132.118	221.942	468.382	124.029	647.11	161.142	405.531	168.643	468.694	NITMOv2_2400	-	conserved protein of unknown function	310.844	190.116	3.18423	1.94752	1.67094	772	4.53853	0.261984	0.847375	0.266786	0.847652	0.00480191	0.864916	0.131791	0.936229	na	4.53853	0.261984	0.847375	0.309171	0.757192	na	4.53853	0.266786	0.847652	0.314735	0.752963	na	4.53853	0.528769	1.45775
NITMOv2_RS02830	NZ_CP011801	584241	584573	+	333	hypothetical protein	361.042	181.952	209.449	152.522	235.784	396.323	332.463	414.77	512.327	NITMOv2_0615	-	conserved protein of unknown function	310.737	122.108	3.18314	1.25086	1.67045	773	5.47324	0.0897744	0.742199	0.633908	0.708293	0.544134	0.738973	0.932669	0.627297	na	5.47324	0.0897744	0.742199	0.120957	0.903725	na	5.47324	0.633908	0.708293	0.89498	0.370798	na	5.47324	0.723683	1.2486
NITMOv2_RS07345	NZ_CP011801	1494834	1496309	+	1476	uroporphyrinogen-III C-methyltransferase	333.964	314.718	244.144	194.992	252.677	238.438	330.03	467.881	418.999	NITMOv2_1602	cobA/hemD	Uroporphyrinogen-III C-methyltransferase and Uroporphyrinogen-III synthase (Modular protein)	310.649	89.2831	3.18224	0.914602	1.67004	774	24.222	-0.275562	0.368579	0.373038	0.348597	0.6486	0.372934	3.11717	0.210433	0.699872	24.222	-0.275562	0.368579	-0.747634	0.454681	0.925151	24.222	0.373038	0.348597	1.07011	0.284569	na	24.222	0.0974761	0.612912
NITMOv2_RS06225	NZ_CP011801	1264333	1266096	+	1764	aspartate--tRNA ligase	361.226	274.785	329.49	268.729	155.786	311.733	389.117	326.243	374.77	NITMOv2_1346	aspS	aspartyl-tRNA synthetase	310.209	71.1077	3.17773	0.728416	1.668	775	29.0909	-0.302663	0.344417	0.0874948	0.33376	0.390157	0.354024	1.32766	0.514876	0.890786	29.0909	-0.302663	0.344417	-0.878768	0.379527	0.890601	29.0909	0.0874948	0.33376	0.262149	0.793207	0.93609	29.0909	-0.215168	0.578536
NITMOv2_RS06770	NZ_CP011801	1382620	1383684	+	1065	hypothetical protein	191.912	284.461	403.852	238.45	258.034	268.495	353.441	410.681	380.457	NITMOv2_1472	-	conserved exported protein of unknown function	309.976	79.0061	3.17534	0.809326	1.66691	776	17.483	-0.0996297	0.427303	0.30101	0.413274	0.40064	0.434693	0.952304	0.621169	na	17.483	-0.0996297	0.427303	-0.233159	0.815638	na	17.483	0.30101	0.413274	0.728354	0.466397	na	17.483	0.20138	0.719589
NITMOv2_RS13485	NZ_CP011801	2774606	2774947	+	342	hypothetical protein	281.233	295.274	203.937	297.016	172.184	257.262	258.971	336.546	685.911	na	-	na	309.815	149.522	3.17369	1.53168	1.66616	777	5.62776	0.0306467	0.741445	0.667026	0.702129	0.636379	0.736634	1.13479	0.567001	na	5.62776	0.0306467	0.741445	0.0413337	0.96703	na	5.62776	0.667026	0.702129	0.950006	0.342109	na	5.62776	0.697673	1.2421
NITMOv2_RS17175	NZ_CP011801	3532345	3533667	+	1323	DUF1015 domain-containing protein	345.323	381.646	316.31	230.339	252.225	399.019	368.197	278.394	209.549	NITMOv2_3738	-	conserved protein of unknown function	309	69.3687	3.16535	0.710602	1.66236	778	21.8022	-0.148898	0.37511	-0.353723	0.382527	-0.204825	0.399853	0.85795	0.651176	0.920639	21.8022	-0.148898	0.37511	-0.396946	0.691407	0.954415	21.8022	-0.353723	0.382527	-0.924701	0.355121	na	21.8022	-0.502622	0.643573
NITMOv2_RS09515	NZ_CP011801	1928499	1928864	-	366	hypothetical protein	197.093	165.547	476.41	555.08	107.262	300.491	483.979	377.373	116.533	NITMOv2_2063	-	conserved protein of unknown function	308.863	171.314	3.16394	1.75492	1.66172	779	6.07695	0.305117	0.742524	0.0970469	0.754621	-0.20807	0.766314	0.177735	0.914967	na	6.07695	0.305117	0.742524	0.410918	0.681132	na	6.07695	0.0970469	0.754621	0.128604	0.897671	na	6.07695	0.402164	1.28622
NITMOv2_RS10285	NZ_CP011801	2084295	2085719	-	1425	sigma-54-dependent Fis family transcriptional regulator	236.235	184.251	293.669	320.778	344.369	277.843	372.918	420.009	329.237	NITMOv2_2230	yfhA	putative DNA-binding response regulator in two-component system	308.812	70.9492	3.16342	0.726792	1.66149	780	23.5009	0.487859	0.365683	0.545366	0.364332	0.0575064	0.366368	2.70495	0.258599	0.756317	23.5009	0.487859	0.365683	1.3341	0.182169	0.763156	23.5009	0.545366	0.364332	1.49689	0.134422	na	23.5009	1.03323	0.631426
NITMOv2_RS01595	NZ_CP011801	338297	339628	+	1332	3-phosphoshikimate 1-carboxyvinyltransferase	162.469	227.44	279.265	343.174	324.203	396.323	365.709	328.359	352.225	NITMOv2_0356	-	fragment of bifunctional protein [Includes putative prephenate or cyclohexadienyl dehydrogenase; 3-phosphoshikimate 1-carboxyvinyltransferase (5- enolpyruvylshikimate-3-phosphate synthase) (EPSP synthase) (EPSPS) (AroA)] (part 2)	308.796	73.7313	3.16326	0.755292	1.66141	781	22.0274	0.774634	0.37493	0.574122	0.380838	-0.200512	0.374886	4.5507	0.102761	0.633815	22.0274	0.774634	0.37493	2.06608	0.0388211	0.534361	22.0274	0.574122	0.380838	1.50752	0.131677	na	22.0274	1.34876	0.656262
NITMOv2_RS09110	NZ_CP011801	1855822	1856046	-	225	hypothetical protein	534.342	359.053	516.64	300.976	174.48	391.038	196.818	204.62	94.7804	NITMOv2_1980	-	Membrane protein (modular protein)	308.083	154.374	3.15595	1.58139	1.65808	782	3.73114	-0.62845	0.823954	-1.61659	0.941567	-0.988141	1.0015	3.19488	0.202414	na	3.73114	-0.62845	0.823954	-0.762724	0.445628	na	3.73114	-1.61659	0.941567	-1.71691	0.0859947	na	3.73114	-2.24504	1.45873
NITMOv2_RS22550	NZ_CP011801	1255769	1256587	+	819	SMC-Scp complex subunit ScpB	308.274	369.903	340.642	268.729	215.703	295.427	270.354	337.285	364.54	NITMOv2_1340	scpB	Segregation and condensation protein B	307.873	50.7296	3.1538	0.519666	1.65709	783	13.4184	-0.270013	0.460028	-0.132238	0.454147	0.137775	0.483584	0.348217	0.840206	na	13.4184	-0.270013	0.460028	-0.58695	0.557237	na	13.4184	-0.132238	0.454147	-0.291179	0.770914	na	13.4184	-0.402252	0.775821
NITMOv2_RS21790	NZ_CP011801	4478815	4479522	-	708	DNA-binding response regulator	322.643	342.317	246.28	358.685	304.971	341.744	281.466	390.165	180.725	NITMOv2_4755	-	putative Phosphate regulon transcriptional regulatory protein PhoB	307.666	63.8076	3.15168	0.653634	1.65612	784	11.6824	0.266797	0.487791	-0.171121	0.508402	-0.437918	0.518508	0.739502	0.690906	na	11.6824	0.266797	0.487791	0.54695	0.584413	na	11.6824	-0.171121	0.508402	-0.336586	0.736429	na	11.6824	0.095676	0.850866
NITMOv2_RS06705	NZ_CP011801	1367320	1367787	+	468	thioredoxin-dependent thiol peroxidase	256.895	129.466	124.192	325.576	545.25	93.9996	378.496	590.249	318.973	NITMOv2_1457	bcp	Peroxiredoxin	307.011	178.679	3.14497	1.83036	1.65305	785	7.67512	1.01821	0.68003	1.21357	0.672166	0.195363	0.647705	3.63864	0.162136	na	7.67512	1.01821	0.68003	1.4973	0.134314	na	7.67512	1.21357	0.672166	1.80547	0.0710016	na	7.67512	2.23179	1.187
NITMOv2_RS11450	NZ_CP011801	2308035	2309027	-	993	hypothetical protein	363.224	264.408	199.008	238.69	336.046	465.17	289.875	301.366	300.663	NITMOv2_2479	-	conserved protein of unknown function	306.494	77.078	3.13968	0.789574	1.65062	786	16.3043	0.404922	0.43241	0.0267527	0.446348	-0.37817	0.450828	1.0722	0.585024	na	16.3043	0.404922	0.43241	0.936432	0.349051	na	16.3043	0.0267527	0.446348	0.0599369	0.952206	na	16.3043	0.431675	0.75443
NITMOv2_RS22660	NZ_CP011801	1721788	1722531	+	744	bifunctional adenosylcobinamide kinase/adenosylcobinamide-phosphate guanylyltransferase	355.51	217.169	296.859	364.084	184.682	295.644	446.412	309.405	286.634	NITMOv2_1836	cobU	Bifunctional adenosylcobalamin biosynthesis protein CobU	306.267	78.0435	3.13735	0.799465	1.64954	787	12.1955	0.050155	0.499319	0.157589	0.495114	0.107434	0.513813	0.10517	0.948774	na	12.1955	0.050155	0.499319	0.100447	0.919989	na	12.1955	0.157589	0.495114	0.318289	0.750266	na	12.1955	0.207744	0.851416
NITMOv2_RS16775	NZ_CP011801	3449295	3450365	-	1071	hypothetical protein	246.965	301.725	336.467	268.729	293.244	266.99	268.764	451.367	318.59	NITMOv2_3651	-	conserved membrane protein of unknown function	305.871	61.4225	3.1333	0.629202	1.64768	788	17.4099	0.0174981	0.413197	0.150997	0.408644	0.133498	0.425664	0.15791	0.924082	na	17.4099	0.0174981	0.413197	0.042348	0.966221	na	17.4099	0.150997	0.408644	0.369506	0.71175	na	17.4099	0.168495	0.703032
NITMOv2_RS11620	NZ_CP011801	2350128	2351018	+	891	carboxypeptidase regulatory-like domain-containing protein	485.766	226.675	287.022	399.022	286.394	246.868	372.761	232.523	215.41	NITMOv2_2515	-	conserved exported protein of unknown function	305.827	93.2501	3.13284	0.955239	1.64747	789	14.7275	-0.00511355	0.466919	-0.392773	0.482859	-0.387659	0.498497	0.828632	0.660792	na	14.7275	-0.00511355	0.466919	-0.0109517	0.991262	na	14.7275	-0.392773	0.482859	-0.813432	0.41597	na	14.7275	-0.397886	0.808599
NITMOv2_RS20395	NZ_CP011801	4180132	4180611	-	480	rRNA maturation RNase YbeY	275.52	336.612	411.697	105.812	245.363	595.723	230.646	239.789	310.998	NITMOv2_4442	-	putative rRNA maturation factor	305.796	137.303	3.13252	1.40651	1.64732	790	7.80044	-0.0701991	0.621125	-0.460511	0.644535	-0.390312	0.669375	0.563124	0.754604	na	7.80044	-0.0701991	0.621125	-0.113019	0.910015	na	7.80044	-0.460511	0.644535	-0.714485	0.474927	na	7.80044	-0.53071	1.07442
NITMOv2_RS11090	NZ_CP011801	2232039	2232368	+	330	hypothetical protein	473.621	306.011	105.676	153.908	297.409	466.58	201.291	488.297	258.492	NITMOv2_2404	-	conserved exported protein of unknown function	305.699	143.034	3.13153	1.46522	1.64687	791	5.35842	0.114793	0.760836	0.00728407	0.768393	-0.107509	0.791611	0.0283006	0.985949	na	5.35842	0.114793	0.760836	0.150877	0.880073	na	5.35842	0.00728407	0.768393	0.00947961	0.992436	na	5.35842	0.122077	1.30842
NITMOv2_RS20480	NZ_CP011801	4197127	4197864	-	738	["23S rRNA (guanosine(2251)-2'-O)-methyltransferase RlmB"]	260.655	465.236	441.034	160.582	186.183	327.852	270.025	374.305	260.068	NITMOv2_4458	yacO	putative TrmH family tRNA/rRNA methyltransferase YacO	305.104	105.882	3.12544	1.08464	1.64406	792	11.8842	-0.692984	0.50807	-0.427925	0.494669	0.26506	0.540928	1.99041	0.369648	na	11.8842	-0.692984	0.50807	-1.36395	0.172582	na	11.8842	-0.427925	0.494669	-0.865073	0.386999	na	11.8842	-1.12091	0.84443
NITMOv2_RS16295	NZ_CP011801	3350794	3351765	-	972	M23 family peptidase	309.226	477.906	298.981	243.847	302.917	158.407	318.918	355.243	263.279	NITMOv2_3548	-	conserved protein of unknown function	303.191	86.3231	3.10584	0.88428	1.63499	793	15.6633	-0.466746	0.4444	-0.259741	0.435942	0.207005	0.468571	1.13214	0.567751	na	15.6633	-0.466746	0.4444	-1.05028	0.293588	na	15.6633	-0.259741	0.435942	-0.595816	0.551298	na	15.6633	-0.726487	0.745328
NITMOv2_RS15255	NZ_CP011801	3135363	3135923	-	561	bifunctional pyr operon transcriptional regulator/uracil phosphoribosyltransferase PyrR	171.447	468.017	435.138	150.891	69.9787	392.084	315.751	451.367	266.095	NITMOv2_3328	pyrR	Bifunctional protein PyrR	302.307	146.16	3.09679	1.49724	1.63077	794	8.88225	-0.717427	0.631169	-0.10804	0.597584	0.609387	0.654268	1.41053	0.493977	na	8.88225	-0.717427	0.631169	-1.13666	0.255679	na	8.88225	-0.10804	0.597584	-0.180794	0.856529	na	8.88225	-0.825466	1.04062
NITMOv2_RS22970	NZ_CP011801	3614522	3614692	+	171	hypothetical protein	140.616	472.438	271.916	198.011	344.369	514.524	258.971	269.237	249.422	NITMOv2_3832	-	putative Regulatory protein, FmdB family	302.167	122.2	3.09535	1.2518	1.6301	795	2.7544	0.403106	0.972802	-0.185247	1.0315	-0.588353	1.04306	0.350306	0.839329	na	2.7544	0.403106	0.972802	0.414376	0.678598	na	2.7544	-0.185247	1.0315	-0.17959	0.857474	na	2.7544	0.217859	1.71251
NITMOv2_RS10530	NZ_CP011801	2129719	2130864	+	1146	peptide chain release factor 2	262.275	281.979	304.303	265.915	342.566	422.26	289.817	361.566	186.087	NITMOv2_2284	prfB	Peptide chain release factor 2	301.863	67.5709	3.09224	0.692185	1.62865	796	18.5083	0.369665	0.396101	-0.105212	0.413136	-0.474877	0.418253	1.48547	0.475811	na	18.5083	0.369665	0.396101	0.93326	0.350686	na	18.5083	-0.105212	0.413136	-0.254667	0.79898	na	18.5083	0.264453	0.692979
NITMOv2_RS07375	NZ_CP011801	1500475	1501038	+	564	bifunctional adenosylcobinamide kinase/adenosylcobinamide-phosphate guanylyltransferase	277.119	286.478	226.717	210.123	487.245	233.999	431.848	448.966	113.434	NITMOv2_1607	cobP	Bifunctional adenosylcobalamin biosynthesis protein CobP	301.77	126.454	3.09128	1.29537	1.62821	797	9.06983	0.347736	0.592101	0.248965	0.597131	-0.0987704	0.605844	0.369015	0.831514	na	9.06983	0.347736	0.592101	0.587291	0.557008	na	9.06983	0.248965	0.597131	0.416936	0.676725	na	9.06983	0.596701	1.02335
NITMOv2_RS08135	NZ_CP011801	1651348	1652913	+	1566	uroporphyrinogen-III C-methyltransferase	276.384	348.219	400.841	237.841	325.897	182.597	353.481	338.093	245.122	NITMOv2_1774	hemD	Porphyrin biosynthesis protein HemD	300.942	69.5382	3.0828	0.712339	1.62424	798	25.0876	-0.338018	0.361466	-0.206502	0.35759	0.131516	0.379039	0.91978	0.631353	0.917781	25.0876	-0.338018	0.361466	-0.935131	0.349721	0.890601	25.0876	-0.206502	0.35759	-0.577481	0.563614	0.832844	25.0876	-0.544519	0.611053
NITMOv2_RS08045	NZ_CP011801	1638183	1638746	-	564	ribosome recycling factor	298.436	143.239	412.213	300.176	34.8032	233.999	353.33	244.891	680.604	NITMOv2_1755	frr	ribosome recycling factor	300.188	181.175	3.07508	1.85592	1.62062	799	8.98795	-0.501188	0.664894	0.478189	0.617649	0.979377	0.667552	2.19234	0.334149	na	8.98795	-0.501188	0.664894	-0.753786	0.450978	na	8.98795	0.478189	0.617649	0.774209	0.438807	na	8.98795	-0.0229986	1.09614
NITMOv2_RS03960	NZ_CP011801	807799	809022	+	1224	hypothetical protein	255.384	396.014	313.403	165.98	304.699	449.263	271.348	300.911	243.92	NITMOv2_0861	-	conserved protein of unknown function	300.102	83.3805	3.0742	0.854136	1.62021	800	19.5416	0.0250825	0.402179	-0.295702	0.413762	-0.320784	0.427197	0.696996	0.705747	na	19.5416	0.0250825	0.402179	0.0623664	0.950271	na	19.5416	-0.295702	0.413762	-0.714665	0.474816	na	19.5416	-0.270619	0.695268
NITMOv2_RS02480	NZ_CP011801	515800	516330	-	531	NADH-quinone oxidoreductase subunit NuoE	384.907	380.352	394.047	191.299	110.898	248.541	375.288	173.407	441.773	NITMOv2_0540	nuoE	NADH-quinone oxidoreductase, subunit E	300.057	119.649	3.07374	1.22567	1.61999	801	8.45236	-0.978159	0.613877	-0.289358	0.569845	0.688801	0.644627	2.63035	0.268428	na	8.45236	-0.978159	0.613877	-1.59341	0.111068	na	8.45236	-0.289358	0.569845	-0.507783	0.611605	na	8.45236	-1.26752	0.993777
NITMOv2_RS11495	NZ_CP011801	2317974	2319047	-	1074	recombinase RecA	279.858	263.272	227.293	362.559	420.361	307.205	474.177	300.071	59.5687	NITMOv2_2489	recA	DNA strand exchange and recombination protein with protease and nuclease activity	299.374	119.182	3.06674	1.22088	1.6167	802	17.3345	0.615448	0.46701	0.0296575	0.485386	-0.585791	0.48384	2.20562	0.331937	na	17.3345	0.615448	0.46701	1.31785	0.187555	na	17.3345	0.0296575	0.485386	0.0611007	0.951279	na	17.3345	0.645106	0.820546
NITMOv2_RS07330	NZ_CP011801	1492794	1493630	+	837	precorrin-3B C(17)-methyltransferase	258.553	289.559	361.092	182.042	257.968	341.633	290.994	330.032	382.179	NITMOv2_1599	cbiH	Cobalt-precorrin-3B C(17)-methyltransferase	299.339	61.9533	3.06638	0.63464	1.61654	803	13.2947	-0.141216	0.469963	0.0644519	0.461392	0.205668	0.486832	0.186068	0.911162	na	13.2947	-0.141216	0.469963	-0.300484	0.763808	na	13.2947	0.0644519	0.461392	0.13969	0.888905	na	13.2947	-0.0767644	0.794034
NITMOv2_RS00945	NZ_CP011801	210439	211836	+	1398	ATP-dependent protease ATPase subunit HslU	275.198	332.278	266.081	302.753	280.816	188.806	269.252	411.655	366.105	NITMOv2_0215	hslU	molecular chaperone and ATPase component of HslUV protease	299.216	64.5404	3.06512	0.661142	1.61594	804	22.2741	-0.0348473	0.377813	0.197567	0.370761	0.232415	0.387118	0.433136	0.805278	0.937487	22.2741	-0.0348473	0.377813	-0.0922343	0.926512	0.980274	22.2741	0.197567	0.370761	0.53287	0.594124	na	22.2741	0.16272	0.640744
NITMOv2_RS20580	NZ_CP011801	4217374	4218627	-	1254	insulinase family protein	287.624	289.905	268.826	283.516	328.716	245.568	282.514	312.07	391.139	NITMOv2_4477	ymxG	Uncharacterized zinc protease YmxG	298.875	41.8815	3.06163	0.429027	1.6143	805	20.0418	0.135561	0.384866	0.150423	0.384678	0.0148623	0.396833	0.189708	0.909506	na	20.0418	0.135561	0.384866	0.352229	0.724666	na	20.0418	0.150423	0.384678	0.391036	0.695771	na	20.0418	0.285984	0.659334
NITMOv2_RS04015	NZ_CP011801	818363	819484	+	1122	rod shape-determining protein RodA	353.609	558.02	414.417	196.158	174.947	215.646	315.751	328.267	133.047	NITMOv2_0872	mrdB	Rod shape-determining protein RodA	298.873	134.622	3.06161	1.37905	1.61429	806	17.7508	-1.04658	0.432035	-0.833766	0.422604	0.212816	0.468663	7.26837	0.0264055	na	17.7508	-1.04658	0.432035	-2.42244	0.0154165	na	17.7508	-0.833766	0.422604	-1.97292	0.0485043	na	17.7508	-1.88035	0.71474
NITMOv2_RS07800	NZ_CP011801	1588668	1590032	+	1365	glutamate-5-semialdehyde dehydrogenase	290.659	325.515	408.77	248.058	230.084	257.828	324.425	269.828	328.086	NITMOv2_1701	proA	Gamma-glutamyl phosphate reductase	298.139	54.9984	3.05409	0.563394	1.61074	807	21.6804	-0.373685	0.373266	-0.227414	0.368369	0.14627	0.393382	1.06123	0.588243	0.909564	21.6804	-0.373685	0.373266	-1.00112	0.316768	0.861737	21.6804	-0.227414	0.368369	-0.617355	0.537001	na	21.6804	-0.601099	0.628727
NITMOv2_RS09510	NZ_CP011801	1928131	1928493	-	363	hypothetical protein	132.482	278.192	352.254	326.472	378.521	242.379	365.984	253.661	352.489	NITMOv2_2062	-	conserved protein of unknown function	298.048	79.5904	3.05316	0.815311	1.6103	808	5.80048	0.445267	0.696673	0.293849	0.706443	-0.151418	0.712867	0.424171	0.808896	na	5.80048	0.445267	0.696673	0.639133	0.522736	na	5.80048	0.293849	0.706443	0.415956	0.677442	na	5.80048	0.739116	1.20857
NITMOv2_RS02500	NZ_CP011801	519362	520579	-	1218	hypothetical protein	404.705	265.31	238.596	208.497	451.242	288.945	254.506	340.193	227.613	NITMOv2_0544	-	conserved protein of unknown function	297.734	83.8041	3.04994	0.858475	1.60878	809	19.4454	0.142729	0.4114	-0.241909	0.424607	-0.384638	0.434763	0.794183	0.672273	na	19.4454	0.142729	0.4114	0.346936	0.72864	na	19.4454	-0.241909	0.424607	-0.569724	0.568865	na	19.4454	-0.0991793	0.714187
NITMOv2_RS08460	NZ_CP011801	1722556	1723614	+	1059	nicotinate-nucleotide--dimethylbenzimidazole phosphoribosyltransferase	295.175	247.929	504.931	223.814	296.567	290.786	397.26	152.161	261.787	NITMOv2_1837	cobT	nicotinate-nucleotide dimethylbenzimidazole-P phophoribosyl transferase	296.712	102.049	3.03947	1.04537	1.60382	810	16.8248	-0.294893	0.446942	-0.458216	0.453607	-0.163323	0.476164	1.10875	0.574432	na	16.8248	-0.294893	0.446942	-0.6598	0.509382	na	16.8248	-0.458216	0.453607	-1.01016	0.312418	na	16.8248	-0.753109	0.764396
NITMOv2_RS02505	NZ_CP011801	521078	523801	-	2724	preprotein translocase subunit SecA	388.398	296.574	315.787	217.528	281.032	250.321	349.525	397.183	172.233	NITMOv2_0547	secA	preprotein translocase subunit, ATPase	296.509	75.6775	3.03739	0.775228	1.60283	811	42.9683	-0.326007	0.306141	-0.220083	0.304023	0.105924	0.318507	1.224	0.542266	0.894921	42.9683	-0.326007	0.306141	-1.06489	0.286925	0.831599	42.9683	-0.220083	0.304023	-0.723902	0.469126	0.792845	42.9683	-0.54609	0.52044
NITMOv2_RS00530	NZ_CP011801	121747	123204	+	1458	hypothetical protein	338.087	304.752	334.859	174.176	242.333	377.159	364.478	221.04	307.159	NITMOv2_0128	-	conserved protein of unknown function	296.005	69.0096	3.03222	0.706923	1.60038	812	22.9852	-0.231652	0.376015	-0.206887	0.375506	0.0247643	0.394915	0.479482	0.786832	0.937301	22.9852	-0.231652	0.376015	-0.61607	0.537848	0.925151	22.9852	-0.206887	0.375506	-0.550956	0.581664	na	22.9852	-0.438539	0.639395
NITMOv2_RS21930	NZ_CP011801	4517588	4517833	+	246	type II toxin-antitoxin system HicB family antitoxin	97.7455	410.502	236.268	275.283	558.549	0	270.025	467.881	346.758	NITMOv2_4787	-	conserved protein of unknown function	295.89	175.269	3.03105	1.79543	1.59982	813	3.87599	0.389465	0.916918	0.541706	0.906994	0.15224	0.918723	0.376498	0.828408	na	3.87599	0.389465	0.916918	0.424755	0.671015	na	3.87599	0.541706	0.906994	0.597254	0.550338	na	3.87599	0.931171	1.57566
NITMOv2_RS01825	NZ_CP011801	378372	379634	+	1263	diaminopimelate decarboxylase	266.536	351.803	423.375	294.9	341.915	174.156	280.501	291.62	236.388	NITMOv2_0405	lysA	Diaminopimelate decarboxylase	295.688	71.5662	3.02898	0.733113	1.59883	814	19.9959	-0.231279	0.394845	-0.440595	0.402814	-0.209316	0.422565	1.22905	0.540897	na	19.9959	-0.231279	0.394845	-0.585746	0.558046	na	19.9959	-0.440595	0.402814	-1.09379	0.274046	na	19.9959	-0.671874	0.676582
NITMOv2_RS17980	NZ_CP011801	3704123	3704542	-	420	PilZ domain-containing protein	257.629	288.525	442.834	241.856	46.7357	418.97	210.876	548.089	203.101	NITMOv2_3916	-	protein of unknown function	295.402	151.119	3.02605	1.54804	1.59743	815	6.5381	-0.412165	0.706573	-0.145113	0.690378	0.267052	0.737623	0.346947	0.840739	na	6.5381	-0.412165	0.706573	-0.58333	0.559671	na	6.5381	-0.145113	0.690378	-0.210194	0.833517	na	6.5381	-0.557278	1.18644
NITMOv2_RS00190	NZ_CP011801	43413	43697	-	285	hypothetical protein	464.034	141.731	367.086	118.807	413.242	308.715	233.074	161.542	448.96	NITMOv2_0040	-	conserved protein of unknown function	295.243	135.933	3.02443	1.39248	1.59666	816	4.51445	-0.194716	0.804045	-0.324094	0.814774	-0.129377	0.856524	0.172133	0.917533	na	4.51445	-0.194716	0.804045	-0.242171	0.808648	na	4.51445	-0.324094	0.814774	-0.397771	0.690799	na	4.51445	-0.51881	1.3737
NITMOv2_RS19185	NZ_CP011801	3943285	3943599	-	315	cell division protein ZapA	343.506	641.166	221.417	214.983	311.572	279.313	210.876	365.393	67.7003	NITMOv2_4172	-	putative Cell division protein ZapA	295.103	157.408	3.02299	1.61246	1.59597	817	4.94748	-0.425658	0.75629	-0.946096	0.801869	-0.520438	0.849607	1.41536	0.492785	na	4.94748	-0.425658	0.75629	-0.562824	0.573555	na	4.94748	-0.946096	0.801869	-1.17986	0.238055	na	4.94748	-1.37175	1.30695
NITMOv2_RS22330	NZ_CP011801	91001	91642	-	642	acyloxyacyl hydrolase	280.904	157.295	235.385	421.93	244.598	102.785	172.446	573.7	465.044	NITMOv2_0088	-	exported protein of unknown function	294.899	158.083	3.02089	1.61938	1.59498	818	10.1002	0.317869	0.601872	0.728725	0.585749	0.410856	0.595957	1.56846	0.456472	na	10.1002	0.317869	0.601872	0.528134	0.597406	na	10.1002	0.728725	0.585749	1.24409	0.213467	na	10.1002	1.04659	1.02739
NITMOv2_RS12890	NZ_CP011801	2635217	2635453	+	237	hypothetical protein	355.101	85.2182	392.385	285.737	248.469	92.8097	653.984	0	539.889	NITMOv2_2790	-	conserved protein of unknown function	294.843	216.824	3.02033	2.22111	1.59471	819	3.75068	-0.330289	0.974237	0.401934	0.919322	0.732223	0.982908	0.571571	0.751424	na	3.75068	-0.330289	0.974237	-0.339023	0.734592	na	3.75068	0.401934	0.919322	0.437207	0.661961	na	3.75068	0.071645	1.61941
NITMOv2_RS22095	NZ_CP011801	4547310	4547762	-	453	hypothetical protein	663.504	267.506	333.592	298.983	303.318	194.224	97.7573	254.081	235.382	NITMOv2_4822	-	conserved exported protein of unknown function	294.261	155.085	3.01436	1.58866	1.59185	820	7.2063	-0.578974	0.63604	-1.2231	0.683968	-0.644131	0.72647	3.39874	0.182799	na	7.2063	-0.578974	0.63604	-0.910278	0.362676	na	7.2063	-1.2231	0.683968	-1.78825	0.0737362	na	7.2063	-1.80208	1.10316
NITMOv2_RS02915	NZ_CP011801	603480	603776	+	297	YggT family protein	202.402	204.007	313.115	399.022	198.273	370.301	223.657	232.523	502.624	NITMOv2_0632	-	conserved protein of unknown function	293.992	109.042	3.0116	1.11701	1.59053	821	4.69527	0.523899	0.772171	0.333257	0.785493	-0.190642	0.787906	0.473162	0.789322	na	4.69527	0.523899	0.772171	0.678475	0.49747	na	4.69527	0.333257	0.785493	0.424265	0.671373	na	4.69527	0.857156	1.34376
NITMOv2_RS07300	NZ_CP011801	1487495	1487872	+	378	hypothetical protein	349.867	267.152	246.019	179.153	259.643	349.141	351.461	304.494	338.502	na	-	na	293.937	60.1531	3.01104	0.616199	1.59026	822	5.90859	-0.0628104	0.684161	0.12077	0.672598	0.18358	0.707714	0.0703146	0.965454	na	5.90859	-0.0628104	0.684161	-0.0918064	0.926852	na	5.90859	0.12077	0.672598	0.179558	0.8575	na	5.90859	0.0579597	1.15761
NITMOv2_RS06620	NZ_CP011801	1347160	1347927	+	768	hypothetical protein	407.018	368.169	272.447	154.309	230.027	286.405	345.969	329.71	249.909	NITMOv2_1440	-	putative Nickel/cobalt efflux system RcnA	293.774	77.719	3.00937	0.796141	1.58946	823	11.9619	-0.558386	0.499695	-0.254099	0.484735	0.304287	0.527112	1.26303	0.531787	na	11.9619	-0.558386	0.499695	-1.11745	0.2638	na	11.9619	-0.254099	0.484735	-0.524201	0.600139	na	11.9619	-0.812484	0.831552
NITMOv2_RS10315	NZ_CP011801	2092248	2092463	-	216	hypothetical protein	0	280.51	215.267	627.034	90.8751	0	615.056	319.718	493.648	NITMOv2_2236	-	conserved exported protein of unknown function	293.568	243.675	3.00726	2.49617	1.58845	824	3.39173	0.847836	1.09916	1.55551	1.05623	0.707678	1.03117	2.16475	0.33879	na	3.39173	0.847836	1.09916	0.771349	0.4405	na	3.39173	1.55551	1.05623	1.47271	0.14083	na	3.39173	2.40335	1.89321
NITMOv2_RS14010	NZ_CP011801	2876593	2876871	+	279	ribbon-helix-helix domain-containing protein	129.276	144.779	208.322	242.723	562.839	394.192	158.724	495.048	305.743	NITMOv2_3054	-	conserved protein of unknown function	293.516	158.327	3.00673	1.62187	1.5882	825	4.38684	1.38917	0.825632	0.888362	0.856369	-0.500806	0.800214	2.89764	0.234847	na	4.38684	1.38917	0.825632	1.68255	0.092462	na	4.38684	0.888362	0.856369	1.03736	0.299568	na	4.38684	2.27753	1.47977
NITMOv2_RS15765	NZ_CP011801	3241452	3243281	-	1830	glutamine--fructose-6-phosphate transaminase (isomerizing)	256.221	286.948	304.902	305.294	203.798	252.412	302.487	377.373	349.6	NITMOv2_3435	glmS	L-glutamineD-fructose-6-phosphate aminotransferase	293.226	52.0795	3.00376	0.533494	1.58677	826	28.56	-0.0340433	0.334546	0.20433	0.328185	0.238373	0.342569	0.58525	0.746302	0.9321	28.56	-0.0340433	0.334546	-0.10176	0.918947	0.980274	28.56	0.20433	0.328185	0.622607	0.533543	0.808717	28.56	0.170287	0.567361
NITMOv2_RS00015	NZ_CP011801	2726	5194	+	2469	DNA topoisomerase (ATP-hydrolyzing) subunit B	384.687	302.664	291.905	246.852	254.406	222.721	367.688	307.676	259.12	NITMOv2_0003	gyrB	DNA gyrase, subunit B	293.08	54.7734	3.00226	0.56109	1.58605	827	38.591	-0.331368	0.299298	-0.152782	0.295106	0.178586	0.312059	1.24056	0.537793	0.894921	38.591	-0.331368	0.299298	-1.10715	0.268228	0.825861	38.591	-0.152782	0.295106	-0.51772	0.604654	0.840403	38.591	-0.48415	0.505917
NITMOv2_RS19880	NZ_CP011801	4070834	4071046	+	213	Fe-S assembly protein IscX	282.223	284.461	109.149	238.45	276.465	413.069	207.906	324.222	500.601	NITMOv2_4324	iscX	Iron-sulfur cluster assembly protein IscX	292.949	113.451	3.00093	1.16218	1.58541	828	3.32849	0.574843	0.922411	0.576246	0.923033	0.00140353	0.922342	0.519962	0.771066	na	3.32849	0.574843	0.922411	0.623196	0.533156	na	3.32849	0.576246	0.923033	0.624297	0.532433	na	3.32849	1.15109	1.59842
NITMOv2_RS03380	NZ_CP011801	697828	698223	+	396	hypothetical protein	425.045	153.005	352.254	384.771	198.273	111.09	223.657	406.914	376.968	NITMOv2_0729	-	conserved protein of unknown function	292.442	120.346	2.99573	1.2328	1.58291	829	6.20456	-0.314195	0.705808	-0.0175038	0.687502	0.296692	0.732537	0.248118	0.883328	na	6.20456	-0.314195	0.705808	-0.445157	0.656207	na	6.20456	-0.0175038	0.687502	-0.02546	0.979688	na	6.20456	-0.331699	1.18534
NITMOv2_RS04445	NZ_CP011801	900682	901611	+	930	dihydroorotate oxidase	297.336	325.753	299.984	327.676	211.065	283.818	261.895	371.286	252.238	NITMOv2_0967	pyrD	Dihydroorotate dehydrogenase	292.339	47.2947	2.99467	0.484479	1.5824	830	14.5199	-0.042554	0.442738	-0.136676	0.447115	-0.0941219	0.466625	0.0963085	0.952987	na	14.5199	-0.042554	0.442738	-0.0961155	0.923429	na	14.5199	-0.136676	0.447115	-0.305684	0.759845	na	14.5199	-0.17923	0.757706
NITMOv2_RS21550	NZ_CP011801	4431448	4432461	+	1014	nitrite reductase, copper-containing	165.994	378.439	183.422	384.012	193.58	281.999	371.217	204.317	462.686	NITMOv2_4695	-	Copper-containing nitrite reductase (fragment)	291.741	109.822	2.98854	1.125	1.57944	831	15.8375	0.427091	0.479276	0.512393	0.476807	0.0853016	0.48092	1.31028	0.519369	na	15.8375	0.427091	0.479276	0.891118	0.372866	na	15.8375	0.512393	0.476807	1.07463	0.282538	na	15.8375	0.939484	0.826327
NITMOv2_RS18665	NZ_CP011801	3838429	3838824	-	396	hypothetical protein	212.522	459.016	234.836	171.009	446.114	166.636	279.571	116.261	538.525	NITMOv2_4061	PTS	6-pyruvoyl tetrahydrobiopterin synthase	291.61	151.409	2.98721	1.55101	1.5788	832	6.17033	-0.0480861	0.721872	0.0474375	0.716616	0.0955236	0.747038	0.018491	0.990797	na	6.17033	-0.0480861	0.721872	-0.066613	0.94689	na	6.17033	0.0474375	0.716616	0.0661965	0.947221	na	6.17033	-0.000648558	1.22931
NITMOv2_RS16215	NZ_CP011801	3332588	3334333	-	1746	lipid A export permease/ATP-binding protein MsbA	316.749	312.32	306.255	223.017	281.057	251.958	393.129	342.791	195.424	NITMOv2_3532	msbA	Lipid A export ATP-binding/permease protein MsbA	291.411	61.0747	2.98517	0.62564	1.57781	833	27.0733	-0.204026	0.34642	-0.0881693	0.343254	0.115857	0.361041	0.348939	0.839903	0.951754	27.0733	-0.204026	0.34642	-0.588956	0.555891	0.925151	27.0733	-0.0881693	0.343254	-0.256863	0.797284	0.93609	27.0733	-0.292196	0.58763
NITMOv2_RS09540	NZ_CP011801	1934087	1934980	-	894	hypothetical protein	349.653	316.28	247.051	170.436	329.346	344.455	297.208	257.491	310.104	NITMOv2_2068	-	conserved exported protein of unknown function	291.336	57.4454	2.9844	0.588461	1.57744	834	13.8993	-0.0301151	0.4589	-0.147688	0.464323	-0.117573	0.483536	0.108845	0.947032	na	13.8993	-0.0301151	0.4589	-0.0656245	0.947677	na	13.8993	-0.147688	0.464323	-0.318073	0.75043	na	13.8993	-0.177803	0.786487
NITMOv2_RS00485	NZ_CP011801	112106	113698	-	1593	ATP-binding protein	256.605	253.568	262.698	414.48	209.475	276.157	361.389	289.011	294.515	NITMOv2_0118	-	putative Tn7-like transposition protein C	290.878	61.7151	2.9797	0.632199	1.57517	835	24.8931	0.347218	0.364771	0.213886	0.368688	-0.133332	0.37374	0.925349	0.629597	0.917781	24.8931	0.347218	0.364771	0.951878	0.341159	0.890601	24.8931	0.213886	0.368688	0.580128	0.561829	0.832844	24.8931	0.561104	0.631107
NITMOv2_RS09420	NZ_CP011801	1904062	1907523	-	3462	DNA polymerase III subunit alpha	347.276	350.03	218.251	224.95	317.511	279.555	236.642	339.112	301.835	NITMOv2_2042	dnaE	DNA polymerase III alpha subunit	290.574	53.0633	2.97659	0.543572	1.57366	836	53.6786	-0.0455206	0.274748	-0.129471	0.276463	-0.08395	0.285037	0.222437	0.894743	0.976083	53.6786	-0.0455206	0.274748	-0.165681	0.868408	0.980274	53.6786	-0.129471	0.276463	-0.46831	0.639563	0.86095	53.6786	-0.174991	0.471796
NITMOv2_RS10565	NZ_CP011801	2137364	2138557	-	1194	tryptophan synthase subunit beta	342.355	169.152	301.806	326.121	443.872	202.642	278.166	192.795	357.213	NITMOv2_2291	trpB	tryptophan synthase beta chain	290.458	89.5837	2.9754	0.917681	1.57309	837	18.7664	0.341735	0.429125	-0.0769968	0.442736	-0.418731	0.44802	1.03507	0.595989	na	18.7664	0.341735	0.429125	0.796352	0.425827	na	18.7664	-0.0769968	0.442736	-0.173911	0.861935	na	18.7664	0.264738	0.748067
NITMOv2_RS09595	NZ_CP011801	1942862	1943578	-	717	guanylate kinase	335.361	338.02	275.613	259.734	273.766	337.455	370.578	288.951	118.971	NITMOv2_2079	gmk	Guanylate kinase	288.717	73.9358	2.95757	0.757386	1.56441	838	11.0737	-0.0200168	0.50731	-0.363963	0.524793	-0.343946	0.544828	0.571504	0.751449	na	11.0737	-0.0200168	0.50731	-0.0394568	0.968526	na	11.0737	-0.363963	0.524793	-0.693536	0.487973	na	11.0737	-0.383979	0.876757
NITMOv2_RS10595	NZ_CP011801	2142104	2143600	-	1497	anthranilate synthase component I	265.029	310.304	287.31	203.566	157.347	323.253	310.609	384.431	356.139	NITMOv2_2297	trpE	Anthranilate synthase component 1	288.665	71.5164	2.95704	0.732602	1.56415	839	22.8448	-0.23851	0.37517	0.216516	0.36075	0.455026	0.383486	1.41093	0.493878	0.890786	22.8448	-0.23851	0.37517	-0.635738	0.524947	0.925151	22.8448	0.216516	0.36075	0.600181	0.548386	na	22.8448	-0.0219947	0.628272
NITMOv2_RS04010	NZ_CP011801	816498	818366	+	1869	penicillin-binding protein 2	225.144	226.929	329.638	307.982	252.058	200.07	402.798	344.865	308.074	NITMOv2_0871	mrdA	Penicillin-binding protein 2	288.617	66.7539	2.95655	0.683816	1.56392	840	28.7534	0.0742946	0.345593	0.345243	0.338798	0.270948	0.350338	1.13808	0.56607	0.89776	28.7534	0.0742946	0.345593	0.214977	0.829785	0.980274	28.7534	0.345243	0.338798	1.01902	0.308192	0.680819	28.7534	0.419537	0.587963
NITMOv2_RS19890	NZ_CP011801	4073667	4075523	+	1857	translational GTPase TypA	213.651	206.644	206.572	300.855	274.827	236.897	369.63	409.074	378.969	NITMOv2_4326	bipA	GTP-binding protein	288.569	80.0954	2.95605	0.820484	1.56367	841	28.5225	0.491051	0.336159	0.805819	0.328543	0.314768	0.330505	6.08665	0.0476762	0.419441	28.5225	0.491051	0.336159	1.46077	0.144078	0.677738	28.5225	0.805819	0.328543	2.4527	0.0141788	0.202878	28.5225	1.29687	0.576762
NITMOv2_RS14670	NZ_CP011801	3008003	3008953	+	951	nitrite reductase	303.412	233.611	330.03	338.242	536.65	323.809	232.829	72.6174	224.244	NITMOv2_3200	-	putative Copper-containing nitrite reductase (NO-forming)	288.383	124.546	2.95415	1.27582	1.56274	842	14.9712	0.555402	0.44588	-0.789984	0.503869	-1.34539	0.503884	7.30704	0.0258999	na	14.9712	0.555402	0.44588	1.24563	0.212899	na	14.9712	-0.789984	0.503869	-1.56784	0.116919	na	14.9712	-0.234582	0.807147
NITMOv2_RS10570	NZ_CP011801	2138605	2139240	-	636	phosphoribosylanthranilate isomerase	207.94	254.047	365.547	239.574	339.495	449.602	348.145	180.973	201.185	NITMOv2_2292	trpF	N-(5'-phosphoribosyl)anthranilate isomerase	287.39	91.7154	2.94397	0.939518	1.55777	843	9.81544	0.389158	0.535201	-0.259536	0.568049	-0.648693	0.574154	1.32834	0.514701	na	9.81544	0.389158	0.535201	0.727125	0.46715	na	9.81544	-0.259536	0.568049	-0.456889	0.647751	na	9.81544	0.129622	0.942648
NITMOv2_RS19960	NZ_CP011801	4086257	4086847	-	591	DUF3501 domain-containing protein	467.888	375.912	295.035	114.585	232.493	223.309	299.723	311.604	252.587	NITMOv2_4339	-	conserved protein of unknown function	285.904	99.6153	2.92875	1.02044	1.55029	844	8.95282	-0.921009	0.581771	-0.480609	0.554076	0.4404	0.620519	2.63142	0.268284	na	8.95282	-0.921009	0.581771	-1.58311	0.113396	na	8.95282	-0.480609	0.554076	-0.867406	0.385719	na	8.95282	-1.40162	0.951772
NITMOv2_RS07925	NZ_CP011801	1617021	1617278	-	258	hypothetical protein	326.197	156.564	135.167	328.099	76.0814	426.277	600.752	356.895	165.315	NITMOv2_1730	-	conserved protein of unknown function	285.705	167.815	2.92672	1.71907	1.54928	845	3.92409	0.490822	0.897045	0.74783	0.880216	0.257008	0.885472	0.742835	0.689756	na	3.92409	0.490822	0.897045	0.547155	0.584273	na	3.92409	0.74783	0.880216	0.849599	0.395548	na	3.92409	1.23865	1.54106
NITMOv2_RS21765	NZ_CP011801	4474471	4474686	-	216	hypothetical protein	333.964	0	376.716	156.759	363.5	305.499	205.019	532.864	296.189	NITMOv2_4749	-	conserved protein of unknown function	285.612	151.252	2.92576	1.5494	1.54881	846	3.27694	0.186256	0.957562	0.338574	0.946156	0.152318	0.973497	0.131796	0.936226	na	3.27694	0.186256	0.957562	0.194511	0.845776	na	3.27694	0.338574	0.946156	0.357842	0.720461	na	3.27694	0.52483	1.63602
NITMOv2_RS11220	NZ_CP011801	2257238	2257543	+	306	hypothetical protein	235.739	132.005	113.965	442.612	128.294	287.528	144.719	526.595	557.532	NITMOv2_2431	-	protein of unknown function	285.443	179.169	2.92403	1.83537	1.54796	847	4.66178	0.941749	0.846865	1.24608	0.830242	0.304331	0.802962	2.39158	0.302465	na	4.66178	0.941749	0.846865	1.11204	0.26612	na	4.66178	1.24608	0.830242	1.50086	0.133391	na	4.66178	2.18783	1.47249
NITMOv2_RS17570	NZ_CP011801	3612256	3612678	-	423	hypothetical protein	198.957	190.985	384.732	360.211	232.021	207.999	418.762	217.681	352.906	NITMOv2_3829	-	Putative Blue copper protein (modular protein)	284.917	91.935	2.91865	0.941767	1.5453	848	6.46274	0.152944	0.67218	0.257296	0.666614	0.104352	0.687848	0.152554	0.92656	na	6.46274	0.152944	0.67218	0.227534	0.820009	na	6.46274	0.257296	0.666614	0.385974	0.699516	na	6.46274	0.41024	1.14859
NITMOv2_RS01800	NZ_CP011801	372514	373491	+	978	ornithine carbamoyltransferase	270.449	144.557	166.402	346.215	200.706	404.833	362.242	188.3	479.717	NITMOv2_0400	argF	Ornithine carbamoyltransferase	284.825	118.557	2.9177	1.21448	1.54483	849	14.9751	0.78177	0.487358	0.732475	0.489188	-0.0492946	0.481767	3.16898	0.205053	na	14.9751	0.78177	0.487358	1.6041	0.108693	na	14.9751	0.732475	0.489188	1.49733	0.134307	na	14.9751	1.51424	0.849439
NITMOv2_RS02770	NZ_CP011801	571927	573009	+	1083	aminotransferase class V-fold PLP-dependent enzyme	299.735	354.328	279.071	312.649	217.496	223.412	347.566	318.833	196.912	NITMOv2_0603	phnW	2-aminoethylphosphonate aminotransferase	283.334	58.0589	2.90242	0.594746	1.53726	850	16.3875	-0.168525	0.426916	-0.179299	0.427719	-0.0107745	0.449682	0.230855	0.890985	na	16.3875	-0.168525	0.426916	-0.394749	0.693028	na	16.3875	-0.179299	0.427719	-0.419199	0.67507	na	16.3875	-0.347824	0.726765
NITMOv2_RS01065	NZ_CP011801	235400	235627	-	228	hypothetical protein	0	88.5821	101.968	519.778	86.0922	385.893	291.342	605.782	467.667	NITMOv2_0240	-	conserved protein of unknown function	283.012	222.048	2.89913	2.27463	1.53562	851	3.43379	2.57667	1.16859	2.8248	1.15705	0.248131	0.903201	7.35628	0.02527	na	3.43379	2.57667	1.16859	2.20494	0.027458	na	3.43379	2.8248	1.15705	2.44139	0.0146309	na	3.43379	5.40147	2.14311
NITMOv2_RS10295	NZ_CP011801	2086489	2088018	-	1530	HAMP domain-containing protein	267.171	330.012	265.917	265.567	141.124	273.152	274.966	406.23	320.581	NITMOv2_2232	-	putative Sensor histidine kinase	282.747	70.6614	2.89641	0.723844	1.53427	852	22.925	-0.21905	0.378121	0.149641	0.36666	0.368691	0.387972	0.910543	0.634276	0.917781	22.925	-0.21905	0.378121	-0.579311	0.562379	0.925151	22.925	0.149641	0.36666	0.408119	0.683186	na	22.925	-0.069409	0.635853
NITMOv2_RS07945	NZ_CP011801	1621107	1621541	+	435	CBS domain-containing protein	276.384	371.434	213.782	194.597	225.621	202.261	101.802	370.432	588.292	NITMOv2_1735	-	conserved protein of unknown function	282.734	143.161	2.89628	1.46652	1.5342	853	6.5103	-0.330832	0.704645	0.262076	0.668553	0.592908	0.717939	0.686313	0.709527	na	6.5103	-0.330832	0.704645	-0.469502	0.638711	na	6.5103	0.262076	0.668553	0.392004	0.695055	na	6.5103	-0.0687567	1.17113
NITMOv2_RS16970	NZ_CP011801	3494261	3495040	-	780	tol-pal system protein YbgF	154.137	258.932	283.158	347.281	301.985	169.199	283.872	472.2	273.405	NITMOv2_3693	-	putative Tol-Pal system protein YbgF	282.685	93.8858	2.89578	0.961751	1.53395	854	11.7509	0.384664	0.516882	0.493335	0.512873	0.108671	0.519769	1.01933	0.600697	na	11.7509	0.384664	0.516882	0.744199	0.456756	na	11.7509	0.493335	0.512873	0.961904	0.336098	na	11.7509	0.877998	0.888961
NITMOv2_RS22140	NZ_CP011801	4555562	4557016	-	1455	TldD/PmbA family protein	338.784	208.214	303.592	221.078	242.833	544.229	304.358	189.853	190.538	NITMOv2_4831	-	conserved protein of unknown function	282.609	112.081	2.895	1.14814	1.53356	855	22.0837	0.291565	0.400631	-0.411541	0.422485	-0.703106	0.427957	2.70537	0.258545	0.756317	22.0837	0.291565	0.400631	0.727764	0.466758	0.925151	22.0837	-0.411541	0.422485	-0.974095	0.330009	na	22.0837	-0.119976	0.703456
[truncated: 3,536 more rows]
[truncated: 3 more columns]
