# Supplementary material for: Cultivation and Transcriptional Analysis of a Canonical Nitrospira Under Stable Growth Conditions
Source: Front Microbiol. 2019 Jun 26;10:1325. doi: 10.3389/fmicb.2019.01325 (PMC6606698; doi:10.3389/fmicb.2019.01325)
Supplement: Supplementary file 3 [file Table_2.xlsx]

## Sheet: Sheet 1
Supplementary table S2. Gene expression levels of selected Nitrospira moscoviensis proteins with function in key metabolic pathways during growth on nitrite.
Identifier	Gene	Product	EC no.	Locus Tag MicroScope	Locus Tag RefSeq	RPKM	RPKM standard deviation	Fold to median	Fold to median standard deviation	Log2-fold to median	Rank
Energy metabolism
Complex I
CI_1	nuoN	NADH-quinone oxidoreductase 1, membrane subunit N	1.6.99.5	NITMOv2_0156	NITMOv2_RS00655	122.2	48.9453	1.2518	0.501387	0.323999	1899
CI_1	nuoM	NADH-quinone oxidoreductase 1, membrane subunit M	1.6.99.5	NITMOv2_0157	NITMOv2_RS00660	88.9679	43.229	0.911373	0.44283	-0.133887	2296
CI_1	nuoM	NADH-quinone oxidoreductase 1, membrane subunit M	1.6.99.5	NITMOv2_0158	NITMOv2_RS00665	136.283	53.8288	1.39606	0.551414	0.481358	1759
CI_1	nuoL	NADH-quinone oxidoreductase 1, membrane subunit L	1.6.99.5	NITMOv2_0159	NITMOv2_RS00670	168.24	51.8635	1.72342	0.531282	0.785278	1498
CI_1	nuoK	NADH-quinone oxidoreductase 1, membrane subunit K	1.6.99.5	NITMOv2_0160	NITMOv2_RS00675	22.8784	47.8684	0.234362	0.490356	-2.09319	3441
CI_1	nuoJ	NADH-quinone oxidoreductase 1, membrane subunit J	1.6.99.5	NITMOv2_0161	NITMOv2_RS00680	115.69	38.7203	1.18511	0.396644	0.245023	1978
CI_1	nuoI	NADH-quinone oxidoreductase 1, subunit I (modular protein)	1.6.99.5	NITMOv2_0162	NITMOv2_RS00685	201.7	69.1796	2.06618	0.708665	1.04697	1241
CI_1		putative NADH-quinone oxidoreductase 1, subunit G	1.6.99.5	NITMOv2_0163	NITMOv2_RS00690	331.337	48.7506	3.39417	0.499393	1.76306	716
CI_1	nuoD	NADH-quinone oxidoreductase 1, subunit D	1.6.99.5	NITMOv2_0164	NITMOv2_RS00695	349.594	98.383	3.58118	1.00782	1.84044	673
CI_1	nuoC	NADH-quinone oxidoreductase 1, subunit C	1.6.99.5	NITMOv2_0165	NITMOv2_RS00700	165.644	106.813	1.69683	1.09417	0.762843	1512
CI_1	nuoB	NADH-quinone oxidoreductase 1, subunit B	1.6.99.5	NITMOv2_0166	NITMOv2_RS00705	123.649	57.737	1.26664	0.591449	0.341004	1881
CI_1	nuoA	NADH-quinone oxidoreductase 1, membrane subunit A	1.6.99.5	NITMOv2_0167	NITMOv2_RS00710	111.263	65.6661	1.13976	0.672672	0.188732	2030
CI_2	nuoN	NADH-quinone oxidoreductase 2, membrane subunit N	1.6.99.5	NITMOv2_0531	NITMOv2_RS02435	115.197	52.4147	1.18005	0.536928	0.238853	1984
CI_2	nuoM	NADH-quinone oxidoreductase 2, membrane subunit M	1.6.99.5	NITMOv2_0532	NITMOv2_RS02440	137.006	47.6651	1.40347	0.488274	0.488997	1751
CI_2	nuoL	NADH-quinone oxidoreductase 2, membrane subunit L	1.6.99.5	NITMOv2_0533	NITMOv2_RS02445	154.658	58.1829	1.58429	0.596016	0.66384	1605
CI_2	nuoK	NADH-quinone oxidoreductase 2, membrane subunit K	1.6.99.5	NITMOv2_0534	NITMOv2_RS02450	148.899	62.5198	1.5253	0.640442	0.609089	1651
CI_2	nuoJ	NADH-quinone oxidoreductase 2, membrane subunit J	1.6.99.5	NITMOv2_0535	NITMOv2_RS02455	96.4586	53.3804	0.988106	0.54682	-0.017262	2209
CI_2	nuoI	NADH-quinone oxidoreductase 2, subunit I	1.6.99.5	NITMOv2_0536	NITMOv2_RS02460	269.31	123.348	2.75877	1.26356	1.46402	892
CI_2	nuoH	NADH-quinone oxidoreductase 2, membrane subunit H	1.6.99.5	NITMOv2_0537	NITMOv2_RS02465	234.222	67.1162	2.39933	0.687527	1.26263	1059
CI_2	nuoG	NADH-quinone oxidoreductase 2, subunit G	1.6.99.5	NITMOv2_0538	NITMOv2_RS02470	414.577	96.9245	4.24686	0.992879	2.0864	519
CI_2	nuoF	NADH-quinone oxidoreductase 2, subunit F	1.6.99.5	NITMOv2_0539	NITMOv2_RS02475	204.092	76.4122	2.09068	0.782754	1.06398	1220
CI_2	nuoE	NADH-quinone oxidoreductase 2, subunit E	1.6.99.5	NITMOv2_0540	NITMOv2_RS02480	300.057	119.649	3.07374	1.22567	1.61999	801
CI_2	nuoCD	NADH-quinone oxidoreductase 2, subunits C and D	1.6.99.5	NITMOv2_0541	NITMOv2_RS02485	243.994	41.9264	2.49943	0.429487	1.3216	994
CI_2	nuoB	NADH-quinone oxidoreductase 2, subunit B	1.6.99.5	NITMOv2_0542	NITMOv2_RS02490	385.179	191.924	3.94571	1.96604	1.98028	585
CI_2	nuoA	NADH-quinone oxidoreductase 2, membrane subunit A	1.6.99.5	NITMOv2_0543	NITMOv2_RS02495	122.696	37.9685	1.25687	0.388944	0.32984	1894
CI_3	nuoA	NADH-quinone oxidoreductase 3, membrane subunit A	1.6.99.5	NITMOv2_2776	NITMOv2_RS12820	3.31179	9.93538	0.0339255	0.101776	-4.88149	4207
CI_3	nuoB	NADH-quinone oxidoreductase 3, subunit B	1.6.99.5	NITMOv2_2777	NITMOv2_RS12825	4.75226	9.86009	0.0486813	0.101005	-4.36049	4127
CI_3	nuoCD	NADH-quinone oxidoreductase 3, subunits C and D	1.6.99.5	NITMOv2_2778	NITMOv2_RS12830	3.54355	5.60382	0.0362995	0.0574046	-4.78391	4198
CI_3	nuoE	NADH-quinone oxidoreductase 3, subunit E	1.6.99.5	NITMOv2_2779	NITMOv2_RS12835	11.3961	26.1547	0.116739	0.267925	-3.09864	3807
CI_3	nuoF	NADH-quinone oxidoreductase 3, subunit F	1.6.99.5	NITMOv2_2780	NITMOv2_RS12840	6.14684	10.6266	0.0629672	0.108857	-3.98926	4050
CI_3	nuoG	NADH-ubiquinone oxidoreductase, subunit G	1.6.5.3	NITMOv2_2781	NITMOv2_RS12845	5.41871	7.95634	0.0555084	0.0815034	-4.17115	4096
CI_3	nuoH	NADH-quinone oxidoreductase 3, membrane subunit H	1.6.99.5	NITMOv2_2782	NITMOv2_RS12850	1.40027	4.2008	0.0143441	0.0430323	-6.1234	4257
CI_3	nuoI	NADH-quinone oxidoreductase 3, subunit I	1.6.99.5	NITMOv2_2783	NITMOv2_RS12855	2.47381	7.42142	0.0253413	0.0760238	-5.30237	4231
CI_3	nuoJ	NADH-quinone oxidoreductase 3, membrane subunit J	1.6.99.5	NITMOv2_2784	NITMOv2_RS12860	8.61374	17.2868	0.0882378	0.177083	-3.50246	3921
CI_3	nuoK	NADH-quinone oxidoreductase 3, membrane subunit K	1.6.99.5	NITMOv2_2785	NITMOv2_RS12865	20.6527	32.5688	0.211563	0.333629	-2.24084	3490
CI_3	nuoL	NADH-quinone oxidoreductase 3, membrane subunit L	1.6.99.5	NITMOv2_2786	NITMOv2_RS12870	9.79886	11.2098	0.100378	0.114831	-3.31649	3870
CI_3	nuoM	NADH-quinone oxidoreductase 3, membrane subunit M	1.6.99.5	NITMOv2_2787	NITMOv2_RS12875	0.827948	2.48384	0.00848137	0.0254441	-6.88149	4267
CI_3	nuoN	NADH-quinone oxidoreductase 3, membrane subunit N	1.6.99.5	NITMOv2_2788	NITMOv2_RS12880	0.875067	2.6252	0.00896405	0.0268921	-6.80163	4266
	nuoF	NADH-quinone oxidoreductase, subunit F	1.6.99.5	NITMOv2_4064	NITMOv2_RS18680	555.709	137.982	5.69259	1.41347	2.50909	332
		putative NADH-quinone oxidoreductase, membrane subunit M		NITMOv2_3006	NITMOv2_RS13845	25.2223	13.9833	0.258373	0.143243	-1.95247	3376
		putative NADH-quinone oxidoreductase, subunit L		NITMOv2_3007	NITMOv2_RS13850	12.1162	11.8491	0.124116	0.12138	-3.01024	3781
	nuoL	NADH-quinone oxidoreductase, membrane subunit L		NITMOv2_3253	NITMOv2_RS14900	44.4323	15.9179	0.455158	0.163061	-1.13556	2984
		putative NADH-quinone oxidoreductase, subunit M		NITMOv2_4855	NITMOv2_RS22250	53.4393	35.5967	0.547424	0.364647	-0.869271	2819
		putative NADH-quinone oxidoreductase, subunit L		NITMOv2_4854	NITMOv2_RS22245	86.6695	23.8905	0.887828	0.24473	-0.171648	2318
Complex II
CII	sdhB	Succinate dehydrogenase/fumarate reductase, Fe-S protein subunit	1.3.99.1	NITMOv2_4642	NITMOv2_RS21350	82.6649	28.6782	0.846806	0.293775	-0.239897	2369
CII	sdhA	Succinate dehydrogenase or fumarate reductase, flavoprotein subunit	1.3.99.1	NITMOv2_4643	NITMOv2_RS21355	75.3957	23.7068	0.772341	0.242848	-0.372689	2468
CII	sdhC	Succinate dehydrogenase/fumarate reductase 1, cytochrome b558 subunit		NITMOv2_4644	NITMOv2_RS21360	46.6426	33.9894	0.477799	0.348182	-1.06552	2940
	sdhA or nadB	Succinate dehydrogenase/fumarate reductase, flavoprotein subunit		NITMOv2_0695	NITMOv2_RS03215	573.999	102.513	5.87996	1.05013	2.55581	313
Complex III
CIII_1		putative Quinol-cytochrome c reductase 1, FeS subunit, modulated with PRC-barrel (modular protein)	1.10.2.2	NITMOv2_0734	NITMOv2_RS03405	935.225	183.069	9.58029	1.87533	3.26007	148
CIII_1		putative Quinol-cytochrome c reductase 1, cytochrome b subunit	1.10.2.2	NITMOv2_0735	NITMOv2_RS03410	691.441	220.224	7.08301	2.25594	2.82436	237
CIII_2		putative Quinol-cytochrome c reductase 3, cytochrome c subunit	1.10.2.2	NITMOv2_3959	NITMOv2_RS18170	127.708	72.3424	1.30822	0.741064	0.3876	1838
CIII_2	qcrB	Quinol-cytochrome c reductase 3, fused cytochrome b/c subunit	1.10.2.2	NITMOv2_3960	NITMOv2_RS18175	154.988	77.7463	1.58767	0.79642	0.66691	1599
CIII_2		putative Quinol-cytochrome c reductase 3, iron-sulfur subunit (Rieske iron-sulfur protein)	1.10.2.2	NITMOv2_3961	NITMOv2_RS18180	577.547	247.761	5.9163	2.53802	2.5647	310
Complex IV and Terminal oxidases
bd-like_1		putative Cytochrome bd-like oxidase 1		NITMOv2_0732	NITMOv2_RS03395	1166.5	135.033	11.9495	1.38325	3.57887	112
bd-like_2 (CIV)		putative Cytochrome bd-like oxidase 2, terminal oxidase		NITMOv2_0737	NITMOv2_RS03420	815.533	151.334	8.35419	1.55024	3.0625	185
CydA_1		Cytochrome bd oxidase 1, subunit I	1.10.3.-	NITMOv2_2587	NITMOv2_RS11960	1.41543	4.24628	0.0144994	0.0434982	-6.10786	4256
CydB_1		putative Cytochrome bd oxidase 1, subunit II	1.10.3.-	NITMOv2_2588	NITMOv2_RS11965	24.9621	22.2021	0.255708	0.227435	-1.96743	3385
CydB_2		putative Cytochrome bd oxidase 2, subunit II	1.10.3.-	NITMOv2_2987	NITMOv2_RS13760	54.1198	19.5097	0.554395	0.199855	-0.851015	2804
CydA_2		Cytochrome bd oxidase 2, subunit I	1.10.3.-	NITMOv2_2988	NITMOv2_RS13765	75.6978	53.7728	0.775436	0.55084	-0.36692	2461
bd-like_3		putative Cytochrome bd-like oxidase 3		NITMOv2_3643	NITMOv2_RS16745	2645.26	394.638	27.0977	4.04261	4.7601	37
bd-like_4		putative Cytochrome bd-like oxidase 4		NITMOv2_3650	NITMOv2_RS16770	262.099	55.191	2.6849	0.565368	1.42487	921
Complex V
CV		putative ATP synthase F1, delta subunit	3.6.3.14	NITMOv2_0296	NITMOv2_RS01315	516.218	216.748	5.28805	2.22034	2.40274	366
CV	atpA	ATP synthase F1, alpha subunit	3.6.3.14	NITMOv2_0297	NITMOv2_RS01320	831.762	128.543	8.52043	1.31677	3.09093	178
CV	atpG	ATP synthase F1, gamma subunit	3.6.3.14	NITMOv2_0298	NITMOv2_RS01325	451.686	112.75	4.62699	1.15499	2.21008	450
CV	atpD	ATP synthase F1, beta subunit	3.6.3.14	NITMOv2_0299	NITMOv2_RS01330	594.823	105.466	6.09328	1.08038	2.60722	295
CV	atpC	ATP synthase F1, epsilon subunit	3.6.3.14	NITMOv2_0300	NITMOv2_RS01335	246.536	136.654	2.52548	1.39986	1.33656	988
CV	atpF	ATP synthase FO, subunit B	3.6.3.14	NITMOv2_4179	NITMOv2_RS19220	2160.32	334.358	22.13	3.42511	4.46793	45
CV	atpE	ATP synthase FO, subunit C	3.6.3.14	NITMOv2_4180	NITMOv2_RS19225	859.309	259.97	8.80262	2.66309	3.13793	165
CV	atpB	ATP synthase FO, subunit A	3.6.3.14	NITMOv2_4181	NITMOv2_RS19230	414.807	134.698	4.24921	1.37983	2.0872	518
	oxaA	Inner-membrane protein insertion factor OxaA		NITMOv2_0285	NITMOv2_RS01270	154.001	35.3658	1.57756	0.362282	0.657692	1612
Nitrite metabolism
NirK_1	nirK	Copper-containing nitrite reductase	1.7.2.1	NITMOv2_0073	NITMOv2_RS00340	35.8744	23.2749	0.367492	0.238425	-1.44422	3131
NirK_2		Copper-containing nitrite reductase (fragment)	1.7.2.1	NITMOv2_0086	NITMOv2_RS00395	265.512	85.2042	2.71986	0.872818	1.44353	906
NxrB_11	nxrB	putative Nitrite oxidoreductase, beta subunit 1	1.7.99.4	NITMOv2_0254	NITMOv2_RS01125	3468.53	806.467	35.5311	8.26132	5.15101	26
NxrA_11	nxrA	putative Nitrite oxidoreductase, alpha subunit 1	1.7.99.4	NITMOv2_0255	NITMOv2_RS01130	3422.75	979.695	35.0621	10.0358	5.13184	28
alt_NxrC_11	nxrC	putative Nitrite oxidoreductase, gamma subunit 1	1.7.99.4	NITMOv2_0740	NITMOv2_RS03435	724.777	197.796	7.4245	2.02619	2.89229	219
NirK_3		putative Copper-containing nitrite reductase	1.7.2.1	NITMOv2_3200	NITMOv2_RS14670	288.383	124.546	2.95415	1.27582	1.56274	842
NxrC_11	nxrC	putative Nitrite oxidoreductase, gamma subunit 2	1.7.99.4	NITMOv2_3617	NITMOv2_RS16630	352.233	112.229	3.60822	1.14966	1.85129	664
NxrC_21	nxrC	putative Nitrite oxidoreductase, gamma subunit 3	1.7.99.4	NITMOv2_3624	NITMOv2_RS16660	18780.4	1845.02	192.383	18.9001	7.58784	2
		conserved Protein of unknown function, putative chaperone protein		NITMOv2_3625	NITMOv2_RS16665	2417.18	379.177	24.7612	3.88423	4.63001	40
	napG	Ferredoxin-type protein NapG		NITMOv2_3626	NITMOv2_RS16670	328.032	171.023	3.36031	1.75193	1.74859	725
alt_NxrC_21	nxrC	putative Nitrite oxidoreductase, cytochrome c containing gamma subunit 4		NITMOv2_3640	NITMOv2_RS16730	4742.88	840.127	48.5853	8.60613	5.60245	17
NxrB_21	nxrB	putative Nitrite oxidoreductase, beta subunit 2	1.7.99.4	NITMOv2_4027	NITMOv2_RS18510	1799.81	413.584	18.437	4.23669	4.20453	58
NxrA_21	nxrA	putative Nitrite oxidoreductase, alpha subunit 2	1.7.99.4	NITMOv2_4028	NITMOv2_RS18515	1460.65	532.28	14.9627	5.45259	3.9033	75
		Sigma-54 dependent transcriptional regulator		NITMOv2_4030	NITMOv2_RS18520	17.9252	14.5915	0.183623	0.149473	-2.44518	3560
NxrB_31	nxrB	putative Nitrite oxidoreductase, beta subunit 3	1.7.99.4	NITMOv2_4032	NITMOv2_RS18530	1481.6	378.475	15.1773	3.87704	3.92384	73
NxrA_31	nxrA	putative Nitrite oxidoreductase, alpha subunit 3	1.7.99.4	NITMOv2_4033	NITMOv2_RS18535	1238.66	361.901	12.6886	3.70726	3.66547	102
		Sigma-54 dependent transcriptional regulator		NITMOv2_4035	NITMOv2_RS18540	430.952	91.6464	4.41461	0.938811	2.14229	483
NxrC_31	nxrC	putative Nitrite oxidoreductase, gamma subunit 5	1.7.99.4	NITMOv2_4208	NITMOv2_RS19340	37.8291	28.6859	0.387515	0.293853	-1.36768	3092
NirK_4		putative Copper-containing nitrite reductase		NITMOv2_4530	NITMOv2_RS20825	80.8088	41.8575	0.827792	0.428782	-0.272659	2389
	nifA	Nif-specific regulatory protein NifA		NITMOv2_4531	NITMOv2_RS20830	5315.82	909.345	54.4544	9.31518	5.76698	14
NxrB_4/5 1,2	nxrB	putative Nitrite oxidoreductase, beta subunit 4, fused with beta subunit 5	1.7.99.4	NITMOv2_4533	NITMOv2_RS20840	15635.7	3866.75	160.17	39.6104	7.32346	4
NxrB_4/5 1,2	nxrB	putative Nitrite oxidoreductase, beta subunit 5, fused with beta subunit 4	1.7.99.4	NITMOv2_4537	NITMOv2_RS20855	2943.01	917.62	30.1477	9.39995	4.91398	35
NxrA_51	nxrA	putative Nitrite oxidoreductase, alpha subunit 5	1.7.99.4	NITMOv2_4538	NITMOv2_RS20860	26030	6947.99	266.647	71.1741	8.05879	1
		Sigma-54 dependent transcriptional regulator		NITMOv2_4539	NITMOv2_RS20865	147.533	49.4276	1.5113	0.506329	0.595792	1667
NirK_5		Copper-containing nitrite reductase (fragment)	1.7.2.1	NITMOv2_4695	NITMOv2_RS21550	291.741	109.822	2.98854	1.125	1.57944	831
NirK_6	nirK	Copper-containing nitrite reductase		NITMOv2_4708	NITMOv2_RS21605	27.5032	23.9766	0.281738	0.245613	-1.82757	3313
TCA cycle
	prpC	2-Methylcitrate synthase		NITMOv2_0045	NITMOv2_RS00215	55.6789	29.3035	0.570366	0.300181	-0.810041	2782
	bkdAB	2-oxoisovalerate dehydrogenase, beta subunit		NITMOv2_0059	NITMOv2_RS00285	27.6056	25.6561	0.282787	0.262817	-1.82221	3308
	bkdAA	2-Oxoisovalerate dehydrogenase, alpha subunit (TPP-binding module)		NITMOv2_0060	NITMOv2_RS00290	53.3062	32.2716	0.54606	0.330585	-0.872868	2822
	ppsA	Phosphoenolpyruvate synthase		NITMOv2_0414	NITMOv2_RS01870	62.3955	21.7241	0.63917	0.222538	-0.645729	2659
	forB	2-Oxoacid:ferredoxin oxidoreductase, beta subunit		NITMOv2_0678	NITMOv2_RS03135	907.501	190.633	9.29629	1.95281	3.21666	154
	forC	2-Oxoglutarate:ferredoxin oxidoredutase, gamma subunit		NITMOv2_0679	NITMOv2_RS03140	1055.72	249.574	10.8146	2.5566	3.43491	123
	forD	2-Oxoglutarate:ferredoxin oxidoredutase delta subunit		NITMOv2_0681	NITMOv2_RS03150	809.321	211.608	8.29056	2.16768	3.05147	186
	forA	Pyruvate:ferredoxin oxidoreductase alpha subunit		NITMOv2_0682	NITMOv2_RS03155	1393.94	207.814	14.2793	2.12881	3.83585	79
	aclB	ATP-citrate lyase, beta subunit		NITMOv2_0690	NITMOv2_RS03190	847.95	163.837	8.68627	1.67832	3.11874	169
	aclA	ATP-citrate lyase, alpha subunit		NITMOv2_0691	NITMOv2_RS03195	676.791	124.228	6.93293	1.27257	2.79347	246
	acnA	Aconitate hydratase		NITMOv2_0692	NITMOv2_RS03200	747.945	87.3242	7.66183	0.894535	2.93769	209
	idh	Isocitrate dehydrogenase (NADP(+))		NITMOv2_0693	NITMOv2_RS03205	700.669	84.44	7.17754	0.864989	2.84349	233
	sucC	Succinyl-CoA synthetase, beta subunit		NITMOv2_0696	NITMOv2_RS03220	400.944	149.364	4.1072	1.53006	2.03816	541
	sucD	Succinyl-CoA synthetase alpha chain		NITMOv2_0697	NITMOv2_RS03225	801.534	193.212	8.21078	1.97923	3.03752	189
	porE	Pyruvate:ferredoxin oxidoreductase epsilon subunit		NITMOv2_0811	NITMOv2_RS03740	780.711	396.491	7.99748	4.06159	2.99955	196
	porC	Pyruvate:ferredoxin oxidoreductase gamma subunit		NITMOv2_0812	NITMOv2_RS03745	967.477	209.104	9.91068	2.14202	3.30898	138
	porB	Pyruvate:ferredoxin oxidoreductase, beta subunit		NITMOv2_0813	NITMOv2_RS03750	1128.69	310.546	11.5621	3.18119	3.53133	116
	porA	Pyruvate:ferredoxin oxidoreductase alpha subunit		NITMOv2_0814	NITMOv2_RS03755	884.157	142.854	9.05716	1.46338	3.17906	158
	porD	Pyruvate:ferredoxin oxidoreductase delta subunit		NITMOv2_0815	NITMOv2_RS03760	391.485	138.188	4.01031	1.41558	2.00371	564
	pycB	Pyruvate carboxylase, subunit B		NITMOv2_1095	NITMOv2_RS05060	191.994	27.0674	1.96676	0.277274	0.975819	1307
	pycA	Pyruvate carboxylase, subunit A		NITMOv2_1096	NITMOv2_RS05065	227.841	58.2326	2.33397	0.596525	1.22278	1092
	lpd	Dihydrolipoyl dehydrogenase		NITMOv2_1820	NITMOv2_RS08370	677.708	135.298	6.94233	1.38597	2.79542	245
	forB	2-Oxoacid:ferredoxin oxidoreductase beta subunit		NITMOv2_1906	NITMOv2_RS08780	64.0574	57.8223	0.656194	0.592323	-0.607806	2636
	fumC	Fumarate hydratase (fumarase C), aerobic Class II		NITMOv2_2088	NITMOv2_RS09635	172.304	41.81	1.76505	0.428295	0.819713	1472
	gltA	Citrate synthase		NITMOv2_2090	NITMOv2_RS09645	92.9739	35.0343	0.952409	0.358885	-0.0703464	2248
		putative Isocitrate dehydrogenase (NADP)		NITMOv2_2966	NITMOv2_RS13665	75.6592	56.1322	0.77504	0.575009	-0.367656	2462
	idh	Isocitrate dehydrogenase [NAD] catalytic subunit		NITMOv2_2967	NITMOv2_RS13670	70.0972	32.045	0.718064	0.328264	-0.477815	2558
	icd	Isocitrate dehydrogenase (NAD(+))		NITMOv2_3291	NITMOv2_RS15075	1.84966	5.54898	0.0189476	0.0568428	-5.72184	4248
		putative Isocitrate dehydrogenase (NADP)		NITMOv2_3292	NITMOv2_RS15080	21.5877	26.4008	0.221141	0.270446	-2.17696	3470
	pdhA	Pyruvate dehydrogenase E1 component (Transketolase)		NITMOv2_4048	NITMOv2_RS18600	99.6827	29.9213	1.02113	0.306509	0.0301715	2172
	aceF	Pyruvate dehydrogenase complex, dihydrolipoyllysine-residue acetyltransferase (E2) component		NITMOv2_4049	NITMOv2_RS18605	125.01	52.0491	1.28058	0.533183	0.356799	1865
	lpd	Dihydrolipoyl dehydrogenase, E3 component		NITMOv2_4051	NITMOv2_RS18610	75.6083	31.7385	0.77452	0.325124	-0.368626	2463
	mdh	Malate dehydrogenase		NITMOv2_4066	NITMOv2_RS18690	233.682	64.8325	2.3938	0.664133	1.2593	1062
	lpd	Dihydrolipoyl dehydrogenase, E3 component of pyruvate and 2-oxoglutarate dehydrogenase complexes		NITMOv2_4808	NITMOv2_RS22025	72.0027	31.837	0.737584	0.326133	-0.439121	2533
Nitrogen assimilation
	gdhA	Glutamate dehydrogenase	1.4.1.3	NITMOv2_0371	NITMOv2_RS01665	139.233	31.2358	1.42628	0.319975	0.512259	1730
		putative Urea ABC transporter, urea binding protein UrtA		NITMOv2_1251	NITMOv2_RS05810	73.4084	55.0558	0.751984	0.563982	-0.411226	2506
	ureA	Urease gamma subunit	3.5.1.5	NITMOv2_1253	NITMOv2_RS05820	55.5222	38.0749	0.568761	0.390033	-0.814107	2785
	ureB	Urease subunit beta (modular protein)	3.5.1.5	NITMOv2_1255	NITMOv2_RS05830	127.087	60.1723	1.30186	0.616396	0.380571	1847
	ureC	Urease alpha subunit	3.5.1.5	NITMOv2_1260	NITMOv2_RS05840	223.025	50.8855	2.28464	0.521263	1.19196	1119
		putative Urease accessory protein UreF		NITMOv2_1261	NITMOv2_RS05845	236.977	92.9565	2.42755	0.952231	1.2795	1036
	ureG	Urease accessory protein UreG		NITMOv2_1262	NITMOv2_RS05850	150.862	62.9945	1.5454	0.645305	0.627984	1638
		putative Urease accessory protein UreD		NITMOv2_1263	NITMOv2_RS05855	200.587	74.0137	2.05479	0.758184	1.03899	1249
	nadE	Glutamine-dependent NAD(+) synthase	6.3.5.1	NITMOv2_1265	NITMOv2_RS05865	190.833	90.4568	1.95486	0.926625	0.967068	1315
AmtB_1	amtB	Ammonium transporter		NITMOv2_1267	NITMOv2_RS05875	1199.18	231.948	12.2842	2.37604	3.61873	106
	glnB	Nitrogen regulatory protein PII		NITMOv2_1268	NITMOv2_RS05880	1277.45	264.556	13.086	2.71007	3.70995	95
		putative (Protein-PII) uridylyltransferase GlnD	2.7.7.59	NITMOv2_1269	NITMOv2_RS05885	1294.59	207.157	13.2616	2.12208	3.72918	92
	glnA	Glutamine synthetase	6.3.1.2	NITMOv2_1270	NITMOv2_RS05890	2323.56	373.756	23.8022	3.82869	4.57302	41
		putative Nitrate ABC transporter, nitrate binding protein NrtA		NITMOv2_1271	NITMOv2_RS05895	431.207	124.306	4.41721	1.27337	2.14314	482
	nrtB	Nitrate ABC transporter, integral membrane subunit (modular protein)		NITMOv2_1272	NITMOv2_RS05900	367.071	133.141	3.76022	1.36387	1.91082	631
		ABC transporter, ATP-binding protein NrtD		NITMOv2_1273	NITMOv2_RS05905	561.655	362.552	5.7535	3.71393	2.52444	326
	cynS	Cyanate hydratase	4.2.1.104	NITMOv2_1274	NITMOv2_RS05910	1730.56	644.72	17.7275	6.6044	4.14792	59
AmtB_2	amtB	Ammonium transporter		NITMOv2_1275	NITMOv2_RS05915	146.778	43.7474	1.50357	0.448142	0.588395	1674
AmtB_3	amtB	Ammonium transporter		NITMOv2_1278	NITMOv2_RS05925	552.363	189.61	5.65832	1.94233	2.50037	334
		putative Quinol-cytochrome c reductase 2, iron sulfur subunit	1.10.2.2	NITMOv2_1279	NITMOv2_RS05930	770.1	254.713	7.88878	2.60924	2.9798	200
		putative Quinol-cytochrome c reductase 2, cytochrome b subunit	1.10.2.2	NITMOv2_1280	NITMOv2_RS05935	712.441	154.224	7.29813	1.57984	2.86753	227
		putative Octaheme cytochrome c		NITMOv2_1281	NITMOv2_RS05940	774.405	188.701	7.93288	1.93302	2.98784	198
	gltD	Glutamate synthase [NADPH] small chain	1.4.1.13	NITMOv2_3735	NITMOv2_RS17160	448.034	63.0278	4.58959	0.645647	2.19837	461
	gltB	Glutamate synthase, large subunit	1.4.1.13	NITMOv2_3736	NITMOv2_RS17165	370.48	78.9563	3.79513	0.808815	1.92415	625
ROS protection
Catalase 1	katA	Catalase	1.11.1.6	NITMOv2_0085	NITMOv2_RS00390	187.489	51.5981	1.9206	0.528563	0.94156	1348
	sod	Superoxide dismutase (Fe)	1.15.1.1	NITMOv2_2805	NITMOv2_RS12970	5.55924	11.5344	0.056948	0.118157	-4.13421	4092
Catalase 2	katA	Catalase (hydroperoxidase II)		NITMOv2_4696	NITMOv2_RS21555	176.084	45.0205	1.80378	0.461183	0.851024	1442
Hydrogen
	hupS	putative [NiFe] Hydrogenase small subunit		NITMOv2_1639	NITMOv2_RS07505	654.327	347.967	6.70282	3.56452	2.74477	260
	hupL	putative [NiFe] Hydrogenase large subunit		NITMOv2_1640	NITMOv2_RS07510	1261.61	560.322	12.9238	5.73985	3.69195	98
Quorum sensing
	aubI	N-acyl-L-homoserine lactone synthetase		NITMOv2_0516	NITMOv2_RS02360	454.175	85.4015	4.6525	0.87484	2.21801	445
	aubR	putative Transcriptional regulator of the LuxR family		NITMOv2_0517	NITMOv2_RS02365	669.498	123.651	6.85823	1.26666	2.77784	251
1Due to a high similarity of nxrAB copies, gene expression analysis based on a more stringent mapping was performed for all nxrA,B and C genes, see table 2.
2Fused nxrB copy after genome deletion event, see supplement figure 1.
